# Supplementary material
Source: PubMed Central journal article supplement (PMC8300883)
Supplement: NIHMS1671262-supplement-1.pdf [file NIHMS1671262-supplement-1.pdf]

**Supplementary Table. 1 siRNA screen of tumor suppressor genes in HUVEC**

| <b>Gene ID</b> | <b>Gene</b> | <b>Z score</b> | <b>Z SD</b> |
|----------------|-------------|----------------|-------------|
| 340061         | STING1      | -4.86          | 0.1         |
| 1613           | DAPK3       | -3.49          | 0.4         |
| 3661           | IRF3        | -3.43          | 0.2         |
| 8125           | ANP32A      | -2.87          | 0.4         |
| 8031           | NCOA4       | -2.70          | 0.7         |
| 1672           | DEFB1       | -2.54          | 0.0         |
| 10524          | KAT5        | -2.45          | 0.3         |
| 84632          | AFAP1L2     | -2.43          | 0.3         |
| 390            | RND3        | -2.43          | 0.2         |
| 51548          | SIRT6       | -2.42          | 0.6         |
| 51741          | WWOX        | -2.39          | 1.3         |
| 92304          | SCGB3A1     | -2.27          | 0.5         |
| 85403          | EAF1        | -2.27          | 0.6         |
| 29760          | BLNK        | -2.25          | 0.8         |
| 23047          | PDS5B       | -2.20          | 1.0         |
| 29110          | TBK1        | -2.18          | 0.2         |
| 29072          | SETD2       | -2.15          | 0.1         |
| 84816          | RTN4IP1     | -2.09          | 0.3         |
| 6767           | ST13        | -2.04          | 0.8         |
| 4853           | NOTCH2      | -2.00          | 0.8         |
| 6424           | SFRP4       | -1.98          | 0.2         |
| 388            | RHOB        | -1.98          | 0.8         |
| 29108          | PYCARD      | -1.97          | 0.3         |
| 5947           | RBP1        | -1.94          | 0.5         |
| 117581         | TWIST2      | -1.90          | 0.2         |
| 10641          | NPRL2       | -1.88          | 0.5         |
| 56998          | CTNNBIP1    | -1.87          | 0.4         |
| 2066           | ERBB4       | -1.86          | 0.2         |
| 23239          | PHLPP1      | -1.85          | 0.8         |
| 2810           | SFN         | -1.84          | 0.2         |
| 7403           | KDM6A       | -1.82          | 0.3         |
| 79633          | FAT4        | -1.81          | 0.3         |
| 7739           | ZNF185      | -1.78          | 0.3         |
| 7182           | NR2C2       | -1.74          | 0.3         |
| 55901          | THSD1       | -1.74          | 0.4         |
| 57510          | XPO5        | -1.74          | 1.4         |
| 27173          | SLC39A1     | -1.73          | 0.8         |
| 55259          | CASC1       | -1.73          | 0.3         |
| 7421           | VDR         | -1.73          | 0.2         |
| 55164          | SHQ1        | -1.72          | 0.2         |
| 8289           | ARID1A      | -1.71          | 0.4         |
| 11315          | PARK7       | -1.71          | 0.9         |
| 10253          | SPRY2       | -1.69          | 0.2         |
| 10481          | HOXB13      | -1.68          | 0.2         |

|        |         |       |     |
|--------|---------|-------|-----|
| 8314   | BAP1    | -1.67 | 0.4 |
| 3621   | ING1    | -1.65 | 0.4 |
| 8870   | IER3    | -1.64 | 0.4 |
| 8572   | PDLIM4  | -1.64 | 0.3 |
| 2132   | EXT2    | -1.63 | 0.1 |
| 200504 | GKN2    | -1.63 | 0.5 |
| 7879   | RAB7A   | -1.62 | 1.1 |
| 3417   | IDH1    | -1.61 | 0.4 |
| 5519   | PPP2R1B | -1.61 | 0.4 |
| 1015   | CDH17   | -1.61 | 0.5 |
| 7869   | SEMA3B  | -1.61 | 0.8 |
| 4494   | MT1F    | -1.61 | 0.4 |
| 10637  | LEFTY1  | -1.61 | 0.5 |
| 355    | FAS     | -1.59 | 0.3 |
| 5909   | RAP1GAP | -1.59 | 0.7 |
| 4495   | MT1G    | -1.59 | 0.2 |
| 54556  | ING3    | -1.58 | 0.7 |
| 7251   | TSG101  | -1.56 | 0.5 |
| 135138 | PACRG   | -1.56 | 0.3 |
| 695    | BTK     | -1.51 | 0.1 |
| 9891   | NUAK1   | -1.50 | 0.1 |
| 7422   | VEGFA   | -1.49 | 0.1 |
| 1264   | CNN1    | -1.47 | 0.6 |
| 43     | ACHE    | -1.43 | 0.1 |
| 375    | ARF1    | -1.43 | 0.2 |
| 7070   | THY1    | -1.42 | 0.3 |
| 3248   | HPGD    | -1.42 | 0.3 |
| 27113  | BBC3    | -1.42 | 0.3 |
| 639    | PRDM1   | -1.41 | 0.5 |
| 9770   | RASSF2  | -1.41 | 0.2 |
| 7248   | TSC1    | -1.41 | 0.2 |
| 7249   | TSC2    | -1.40 | 0.1 |
| 8404   | SPARCL1 | -1.40 | 0.1 |
| 2050   | EPHB4   | -1.39 | 0.2 |
| 27330  | RPS6KA6 | -1.39 | 0.3 |
| 10277  | UBE4B   | -1.39 | 0.3 |
| 8633   | UNC5C   | -1.38 | 0.7 |
| 2262   | GPC5    | -1.38 | 0.5 |
| 4916   | NTRK3   | -1.38 | 0.4 |
| 6041   | RNASEL  | -1.37 | 0.0 |
| 659    | BMP2    | -1.37 | 0.2 |
| 83787  | ARMC10  | -1.36 | 0.0 |
| 5771   | PTPN2   | -1.35 | 0.2 |
| 79893  | GGNBP2  | -1.35 | 1.1 |
| 1050   | CEBPA   | -1.34 | 0.3 |
| 222235 | FBXL13  | -1.34 | 0.4 |
| 79798  | ARMC5   | -1.32 | 0.0 |

|        |           |       |      |
|--------|-----------|-------|------|
| 7268   | TTC4      | -1.32 | 0.3  |
| 5795   | PTPRJ     | -1.30 | 0.3  |
| 51523  | CXXC5     | -1.30 | 1.7  |
| 185    | AGTR1     | -1.30 | 0.2  |
| 8379   | MAD1L1    | -1.29 | 0.2  |
| 4814   | NINJ1     | -1.28 | 0.2  |
| 27253  | PCDH17    | -1.28 | 0.2  |
| 10653  | SPINT2    | -1.27 | 0.3  |
| 5783   | PTPN13    | -1.27 | 0.5  |
| 2203   | FBP1      | -1.26 | 0.4  |
| 9940   | DLEC1     | -1.26 | 0.1  |
| 10210  | TOPORS    | -1.25 | 0.5  |
| 56999  | ADAMTS9   | -1.24 | 0.3  |
| 4311   | MME       | -1.24 | 0.3  |
| 54904  | WHSC1L1   | -1.22 | 0.4  |
| 23365  | ARHGEF12  | -1.20 | 0.0  |
| 4087   | SMAD2     | -1.19 | 0.0  |
| 445    | ASS1      | -1.18 | 0.1  |
| 84289  | ING5      | -1.18 | 0.6  |
| 1969   | EPHA2     | -1.18 | 1.1  |
| 4862   | NPAS2     | -1.18 | 0.4  |
| 11009  | IL24      | -1.17 | 0.4  |
| 8821   | INPP4B    | -1.17 | 0.5  |
| 84464  | SLX4      | -1.17 | 0.2  |
| 1437   | CSF2      | -1.17 | 0.3  |
| 9368   | SLC9A3R1  | -1.16 | 0.3  |
| 5934   | RBL2      | -1.16 | 0.4  |
| 5071   | PARK2     | -1.14 | 0.20 |
| 79626  | TNFAIP8L2 | -1.14 | 0.3  |
| 1894   | ECT2      | -1.14 | 0.4  |
| 11095  | ADAMTS8   | -1.13 | 0.4  |
| 2145   | EZH1      | -1.12 | 0.6  |
| 23671  | TMEFF2    | -1.12 | 0.3  |
| 8841   | HDAC3     | -1.12 | 0.7  |
| 2626   | GATA4     | -1.12 | 0.1  |
| 51473  | DCDC2     | -1.12 | 1.0  |
| 56981  | PRDM11    | -1.12 | 0.8  |
| 1756   | DMD       | -1.12 | 0.4  |
| 51100  | SH3GLB1   | -1.11 | 0.5  |
| 6050   | RNH1      | -1.11 | 0.4  |
| 153090 | DAB2IP    | -1.10 | 0.5  |
| 91608  | RASL10B   | -1.10 | 0.4  |
| 6297   | SALL2     | -1.09 | 0.0  |
| 1796   | DOK1      | -1.09 | 0.4  |
| 7048   | TGFBR2    | -1.07 | 0.5  |
| 688    | KLF5      | -1.06 | 0.2  |
| 55743  | CHFR      | -1.06 | 0.3  |

|        |          |       |     |
|--------|----------|-------|-----|
| 1030   | CDKN2B   | -1.06 | 0.2 |
| 92597  | MOB1B    | -1.06 | 0.2 |
| 2308   | FOXO1    | -1.06 | 0.4 |
| 57142  | RTN4     | -1.05 | 0.2 |
| 1080   | CFTR     | -1.05 | 0.4 |
| 8726   | EED      | -1.04 | 0.3 |
| 6597   | SMARCA4  | -1.04 | 0.3 |
| 5371   | PML      | -1.03 | 0.4 |
| 4899   | NRF1     | -1.03 | 0.6 |
| 6648   | SOD2     | -1.02 | 0.2 |
| 78986  | DUSP26   | -1.02 | 0.3 |
| 7832   | BTG2     | -1.02 | 0.2 |
| 463    | ZFH3     | -1.02 | 0.8 |
| 3605   | IL17A    | -1.02 | 0.2 |
| 347252 | IGFBPL1  | -1.01 | 0.4 |
| 122953 | JDP2     | -1.01 | 0.8 |
| 64579  | NDST4    | -1.01 | 0.4 |
| 7184   | HSP90B1  | -1.00 | 0.3 |
| 9113   | LATS1    | -1.00 | 0.2 |
| 8991   | SELENBP1 | -0.99 | 1.0 |
| 3094   | HINT1    | -0.98 | 0.3 |
| 7941   | PLA2G7   | -0.97 | 0.2 |
| 1739   | DLG1     | -0.97 | 0.1 |
| 59269  | HIVEP3   | -0.95 | 0.4 |
| 4144   | MAT2A    | -0.95 | 1.1 |
| 2114   | ETS2     | -0.95 | 0.2 |
| 219285 | SAMD9L   | -0.95 | 0.3 |
| 57575  | PCDH10   | -0.94 | 0.4 |
| 1643   | DDB2     | -0.94 | 0.3 |
| 8682   | PEA15    | -0.93 | 0.4 |
| 10788  | IQGAP2   | -0.93 | 0.4 |
| 7980   | TFPI2    | -0.93 | 0.3 |
| 8915   | BCL10    | -0.93 | 0.7 |
| 10904  | BLCAP    | -0.93 | 0.2 |
| 170692 | ADAMTS18 | -0.93 | 0.3 |
| 26260  | FBXO25   | -0.93 | 0.2 |
| 150094 | SIK1     | -0.89 | 0.1 |
| 65009  | NDRG4    | -0.89 | 0.5 |
| 2034   | EPAS1    | -0.89 | 0.2 |
| 2099   | ESR1     | -0.89 | 0.2 |
| 6390   | SDHB     | -0.89 | 1.0 |
| 5047   | PAEP     | -0.88 | 0.3 |
| 219699 | UNC5B    | -0.88 | 0.3 |
| 841    | CASP8    | -0.87 | 0.2 |
| 83593  | RASSF5   | -0.87 | 0.3 |
| 55630  | SLC39A4  | -0.87 | 0.1 |
| 4854   | NOTCH3   | -0.86 | 0.5 |

|        |          |       |     |
|--------|----------|-------|-----|
| 4601   | MXI1     | -0.86 | 0.1 |
| 7538   | ZFP36    | -0.86 | 0.2 |
| 5048   | PAFAH1B1 | -0.85 | 0.6 |
| 3337   | DNAJB1   | -0.85 | 0.6 |
| 8742   | TNFSF12  | -0.84 | 1.1 |
| 28996  | HIPK2    | -0.84 | 0.3 |
| 29119  | CTNNA3   | -0.84 | 1.0 |
| 7262   | PHLDA2   | -0.81 | 0.5 |
| 5333   | PLCD1    | -0.81 | 0.3 |
| 10550  | ARL6IP5  | -0.81 | 0.1 |
| 57410  | SCYL1    | -0.80 | 0.2 |
| 7982   | ST7      | -0.80 | 0.3 |
| 23152  | CIC      | -0.79 | 0.3 |
| 84152  | PPP1R1B  | -0.79 | 0.3 |
| 199    | AIF1     | -0.79 | 0.1 |
| 1500   | CTNND1   | -0.78 | 0.4 |
| 863    | CBFA2T3  | -0.78 | 0.1 |
| 2077   | ERF      | -0.78 | 0.3 |
| 196528 | ARID2    | -0.78 | 0.6 |
| 160492 | LMNTD1   | -0.77 | 0.3 |
| 84446  | BRSK1    | -0.77 | 0.2 |
| 23136  | EPB41L3  | -0.77 | 0.4 |
| 4640   | MYO1A    | -0.77 | 0.8 |
| 80013  | FAM188A  | -0.77 | 0.4 |
| 668    | FOXL2    | -0.76 | 0.3 |
| 29948  | OSGIN1   | -0.76 | 0.2 |
| 5157   | PDGFRL   | -0.76 | 0.2 |
| 1031   | CDKN2C   | -0.76 | 0.5 |
| 57531  | HACE1    | -0.75 | 0.5 |
| 23582  | CCNDBP1  | -0.75 | 0.4 |
| 84879  | MFSD2A   | -0.74 | 0.4 |
| 3273   | HRG      | -0.74 | 0.6 |
| 2189   | FANCG    | -0.74 | 0.1 |
| 23032  | USP33    | -0.74 | 0.8 |
| 84897  | TBRG1    | -0.74 | 0.3 |
| 5729   | PTGDR    | -0.73 | 0.7 |
| 1687   | DFNA5    | -0.73 | 0.6 |
| 1848   | DUSP6    | -0.73 | 0.5 |
| 5789   | PTPRD    | -0.73 | 0.3 |
| 3690   | ITGB3    | -0.72 | 0.2 |
| 7157   | TP53     | -0.72 | 0.1 |
| 93492  | TPTE2    | -0.72 | 0.3 |
| 4692   | NDN      | -0.72 | 0.2 |
| 26524  | LATS2    | -0.71 | 0.2 |
| 678    | ZFP36L2  | -0.70 | 0.1 |
| 81848  | SPRY4    | -0.70 | 0.4 |
| 26468  | LHX6     | -0.70 | 0.3 |

|        |           |       |      |
|--------|-----------|-------|------|
| 11107  | PRDM5     | -0.69 | 0.4  |
| 2932   | GSK3B     | -0.69 | 0.9  |
| 339967 | TMPRSS11A | -0.69 | 0.33 |
| 7520   | XRCC5     | -0.69 | 0.2  |
| 5524   | PPP2R4    | -0.68 | 0.5  |
| 90627  | STARD13   | -0.68 | 0.4  |
| 56954  | NIT2      | -0.68 | 0.4  |
| 7345   | UCHL1     | -0.68 | 0.1  |
| 23512  | SUZ12     | -0.68 | 0.8  |
| 5468   | PPARG     | -0.67 | 0.4  |
| 10553  | HTATIP2   | -0.67 | 0.5  |
| 4502   | MT2A      | -0.66 | 0.8  |
| 2195   | FAT1      | -0.66 | 0.2  |
| 6793   | STK10     | -0.65 | 0.4  |
| 9093   | DNAJA3    | -0.65 | 0.3  |
| 9052   | GPRC5A    | -0.64 | 0.4  |
| 84934  | RITA1     | -0.64 | 0.2  |
| 7049   | TGFBR3    | -0.64 | 0.5  |
| 58189  | WFDC1     | -0.64 | 0.1  |
| 57586  | SYT13     | -0.64 | 1.0  |
| 7703   | PCGF2     | -0.62 | 0.4  |
| 84707  | BEX2      | -0.62 | 0.2  |
| 5788   | PTPRC     | -0.62 | 0.1  |
| 51474  | LIMA1     | -0.61 | 0.6  |
| 84872  | ZC3H10    | -0.61 | 0.7  |
| 2444   | FRK       | -0.61 | 0.6  |
| 55654  | TMEM127   | -0.61 | 0.1  |
| 838    | CASP5     | -0.61 | 0.45 |
| 1496   | CTNNA2    | -0.61 | 0.3  |
| 1026   | CDKN1A    | -0.60 | 0.5  |
| 55193  | PBRM1     | -0.60 | 0.3  |
| 56940  | DUSP22    | -0.60 | 0.2  |
| 657    | BMPR1A    | -0.60 | 0.7  |
| 2192   | FBLN1     | -0.59 | 0.3  |
| 5515   | PPP2CA    | -0.59 | 0.4  |
| 55748  | CNDP2     | -0.58 | 0.4  |
| 85480  | TSLP      | -0.58 | 0.2  |
| 3164   | NR4A1     | -0.58 | 0.3  |
| 10612  | TRIM3     | -0.57 | 0.3  |
| 5925   | RB1       | -0.57 | 0.8  |
| 6392   | SDHD      | -0.57 | 0.4  |
| 3579   | CXCR2     | -0.56 | 0.4  |
| 6498   | SKIL      | -0.56 | 0.2  |
| 7545   | ZIC1      | -0.55 | 0.4  |
| 6688   | SPI1      | -0.55 | 0.8  |
| 25930  | PTPN23    | -0.55 | 0.6  |
| 5915   | RARB      | -0.54 | 0.2  |

|        |          |       |     |
|--------|----------|-------|-----|
| 2878   | GPX3     | -0.54 | 0.1 |
| 54778  | RNF111   | -0.54 | 0.6 |
| 10370  | CITED2   | -0.53 | 0.2 |
| 11184  | MAP4K1   | -0.53 | 1.1 |
| 171024 | SYNPO2   | -0.52 | 0.4 |
| 9455   | HOMER2   | -0.52 | 0.2 |
| 51247  | PAIP2    | -0.52 | 0.2 |
| 2934   | GSN      | -0.52 | 0.3 |
| 2719   | GPC3     | -0.52 | 0.5 |
| 64326  | RFWD2    | -0.52 | 0.4 |
| 6282   | S100A11  | -0.51 | 0.3 |
| 79648  | MCPH1    | -0.51 | 0.4 |
| 960    | CD44     | -0.51 | 0.3 |
| 5927   | KDM5A    | -0.50 | 0.2 |
| 8434   | RECK     | -0.50 | 0.5 |
| 6422   | SFRP1    | -0.47 | 0.1 |
| 3479   | IGF1     | -0.47 | 0.5 |
| 55591  | VEZT     | -0.47 | 0.3 |
| 7965   | AIMP2    | -0.47 | 0.3 |
| 1832   | DSP      | -0.47 | 0.4 |
| 94241  | TP53INP1 | -0.47 | 0.5 |
| 6477   | SIAH1    | -0.47 | 0.6 |
| 6910   | TBX5     | -0.47 | 0.3 |
| 5079   | PAX5     | -0.46 | 0.1 |
| 2070   | EYA4     | -0.46 | 0.7 |
| 8994   | LIMD1    | -0.46 | 0.2 |
| 4089   | SMAD4    | -0.45 | 0.1 |
| 2587   | GALR1    | -0.45 | 0.4 |
| 3096   | HIVEP1   | -0.44 | 0.4 |
| 10320  | IKZF1    | -0.44 | 0.2 |
| 58508  | KMT2C    | -0.44 | 0.3 |
| 4826   | NNAT     | -0.44 | 0.1 |
| 3728   | JUP      | -0.43 | 0.3 |
| 2697   | GJA1     | -0.43 | 0.3 |
| 56616  | DIABLO   | -0.43 | 0.1 |
| 9447   | AIM2     | -0.43 | 0.3 |
| 3329   | HSPD1    | -0.42 | 0.4 |
| 9821   | RB1CC1   | -0.42 | 0.6 |
| 310    | ANXA7    | -0.42 | 0.2 |
| 51696  | HECA     | -0.41 | 0.2 |
| 247    | ALOX15B  | -0.41 | 0.4 |
| 9411   | ARHGAP29 | -0.41 | 0.4 |
| 3678   | ITGA5    | -0.40 | 0.2 |
| 1647   | GADD45A  | -0.39 | 0.2 |
| 2131   | EXT1     | -0.39 | 0.6 |
| 2633   | GBP1     | -0.39 | 0.5 |
| 1387   | CREBBP   | -0.38 | 0.2 |

|        |         |       |     |
|--------|---------|-------|-----|
| 4477   | MSMB    | -0.38 | 0.6 |
| 5465   | PPARA   | -0.38 | 0.2 |
| 10180  | RBM6    | -0.38 | 0.3 |
| 5320   | PLA2G2A | -0.38 | 0.3 |
| 8567   | MADD    | -0.38 | 0.2 |
| 55735  | DNAJC11 | -0.37 | 0.3 |
| 3688   | ITGB1   | -0.37 | 0.1 |
| 4920   | ROR2    | -0.37 | 0.3 |
| 51201  | ZDHHC2  | -0.36 | 0.3 |
| 3977   | LIFR    | -0.36 | 0.3 |
| 4978   | OPCML   | -0.35 | 0.5 |
| 3394   | IRF8    | -0.35 | 0.1 |
| 1012   | CDH13   | -0.35 | 0.3 |
| 6596   | HLTF    | -0.35 | 0.6 |
| 22943  | DKK1    | -0.34 | 0.1 |
| 23327  | NEDD4L  | -0.34 | 0.3 |
| 1739   | DLG1    | -0.33 | 0.5 |
| 1630   | DCC     | -0.33 | 0.1 |
| 23411  | SIRT1   | -0.33 | 0.2 |
| 285671 | RNF180  | -0.33 | 0.2 |
| 116173 | CMTM5   | -0.32 | 0.2 |
| 53353  | LRP1B   | -0.32 | 0.7 |
| 6772   | STAT1   | -0.32 | 0.5 |
| 1852   | DUSP9   | -0.32 | 0.2 |
| 317    | APAF1   | -0.32 | 0.2 |
| 1620   | BRINP1  | -0.31 | 0.5 |
| 84417  | C2orf40 | -0.31 | 0.6 |
| 5071   | PARK2   | -0.31 | 0.8 |
| 23513  | SCRIB   | -0.31 | 0.4 |
| 5581   | PRKCE   | -0.30 | 0.3 |
| 4216   | MAP3K4  | -0.30 | 0.4 |
| 50943  | FOXP3   | -0.30 | 0.4 |
| 2950   | GSTP1   | -0.30 | 0.4 |
| 3486   | IGFBP3  | -0.29 | 0.6 |
| 3172   | HNF4A   | -0.29 | 0.9 |
| 23193  | GANAB   | -0.29 | 0.4 |
| 8065   | CUL5    | -0.29 | 0.4 |
| 5770   | PTPN1   | -0.28 | 0.3 |
| 9636   | ISG15   | -0.28 | 0.6 |
| 79026  | AHNAK   | -0.28 | 0.5 |
| 254394 | MCM9    | -0.28 | 0.4 |
| 10771  | ZMYND11 | -0.27 | 0.3 |
| 2170   | FABP3   | -0.27 | 0.3 |
| 6387   | CXCL12  | -0.27 | 0.4 |
| 2395   | FXN     | -0.27 | 0.3 |
| 4734   | NEDD4   | -0.26 | 0.8 |
| 8065   | CUL5    | -0.26 | 0.3 |



|        |           |       |     |
|--------|-----------|-------|-----|
| 4015   | LOX       | -0.26 | 0.6 |
| 7068   | THRB      | -0.26 | 0.3 |
| 27132  | CPNE7     | -0.25 | 0.1 |
| 7159   | TP53BP2   | -0.25 | 0.5 |
| 6091   | ROBO1     | -0.25 | 0.6 |
| 9148   | NEURL1    | -0.25 | 0.5 |
| 2042   | EPHA3     | -0.24 | 0.5 |
| 22925  | PLA2R1    | -0.24 | 0.1 |
| 4763   | NF1       | -0.23 | 0.2 |
| 2521   | FUS       | -0.23 | 0.9 |
| 2146   | EZH2      | -0.22 | 0.5 |
| 64651  | CSRNP1    | -0.22 | 0.5 |
| 11178  | LZTS1     | -0.21 | 0.5 |
| 4616   | GADD45B   | -0.21 | 0.6 |
| 9049   | AIP       | -0.21 | 0.2 |
| 10628  | TXNIP     | -0.21 | 0.1 |
| 5563   | PRKAA2    | -0.21 | 0.3 |
| 57491  | AHRR      | -0.21 | 0.4 |
| 8795   | TNFRSF10B | -0.20 | 0.1 |
| 23409  | SIRT4     | -0.20 | 0.4 |
| 1755   | DMBT1     | -0.20 | 0.2 |
| 3169   | FOXA1     | -0.19 | 0.3 |
| 8099   | CDK2AP1   | -0.19 | 0.2 |
| 51684  | SUFU      | -0.19 | 0.4 |
| 5216   | PFN1      | -0.19 | 0.2 |
| 8431   | NROB2     | -0.19 | 0.2 |
| 5601   | MAPK9     | -0.18 | 0.2 |
| 23095  | KIF1B     | -0.18 | 0.3 |
| 255877 | BCL6B     | -0.17 | 0.2 |
| 10010  | TANK      | -0.17 | 0.3 |
| 2012   | EMP1      | -0.17 | 0.4 |
| 650    | BMP2      | -0.17 | 0.2 |
| 22954  | TRIM32    | -0.16 | 0.7 |
| 23300  | ATMIN     | -0.15 | 0.3 |
| 414899 | BLID      | -0.15 | 0.3 |
| 5527   | PPP2R5C   | -0.15 | 0.2 |
| 55799  | CACNA2D3  | -0.15 | 0.1 |
| 56475  | RPRM      | -0.15 | 0.9 |
| 5414   | SEPTIN4   | -0.15 | 0.6 |
| 472    | ATM       | -0.15 | 0.3 |
| 5602   | MAPK10    | -0.14 | 0.4 |
| 51129  | ANGPTL4   | -0.14 | 0.1 |
| 3488   | IGFBP5    | -0.14 | 0.0 |
| 10078  | TSSC4     | -0.14 | 0.5 |
| 10472  | ZBTB18    | -0.13 | 0.2 |
| 1191   | CLU       | -0.13 | 0.5 |
| 1601   | DAB2      | -0.13 | 0.1 |

|        |         |       |     |
|--------|---------|-------|-----|
| 54766  | BTG4    | -0.13 | 0.5 |
| 55717  | WDR11   | -0.13 | 0.5 |
| 5933   | RBL1    | -0.13 | 0.2 |
| 3627   | CXCL10  | -0.13 | 0.8 |
| 8665   | EIF3F   | -0.13 | 0.5 |
| 1676   | DFFA    | -0.13 | 0.2 |
| 56849  | TCEAL7  | -0.13 | 0.0 |
| 26512  | INTS6   | -0.13 | 0.5 |
| 2134   | EXTL1   | -0.12 | 0.3 |
| 9901   | SRGAP3  | -0.12 | 0.2 |
| 11010  | GLIPR1  | -0.12 | 0.2 |
| 89884  | LHX4    | -0.12 | 0.2 |
| 4335   | MNT     | -0.12 | 0.3 |
| 9077   | DIRAS3  | -0.12 | 0.4 |
| 11108  | PRDM4   | -0.11 | 0.5 |
| 7447   | VSNL1   | -0.11 | 0.3 |
| 91133  | L3MBTL4 | -0.11 | 0.5 |
| 115761 | ARL11   | -0.10 | 1.3 |
| 10768  | AHCYL1  | -0.10 | 0.5 |
| 134111 | UBE2QL1 | -0.09 | 0.3 |
| 1002   | CDH4    | -0.09 | 0.5 |
| 5522   | PPP2R2C | -0.08 | 0.4 |
| 51177  | PLEKHO1 | -0.08 | 0.1 |
| 338442 | HCAR2   | -0.08 | 0.6 |
| 79961  | DENND2D | -0.08 | 0.2 |
| 10273  | STUB1   | -0.08 | 0.3 |
| 23612  | PHLDA3  | -0.07 | 0.4 |
| 8406   | SRPX    | -0.07 | 0.3 |
| 2706   | GJB2    | -0.07 | 0.5 |
| 3611   | ILK     | -0.07 | 0.3 |
| 22806  | IKZF3   | -0.07 | 0.6 |
| 115426 | UHRF2   | -0.06 | 0.2 |
| 117153 | MIA2    | -0.06 | 0.1 |
| 26959  | HBP1    | -0.06 | 0.6 |
| 92344  | GORAB   | -0.06 | 0.2 |
| 139285 | AMER1   | -0.06 | 0.5 |
| 2035   | EPB41   | -0.05 | 0.4 |
| 23604  | DAPK2   | -0.05 | 0.1 |
| 5196   | PF4     | -0.05 | 0.2 |
| 4849   | CNOT3   | -0.05 | 0.4 |
| 1602   | DACH1   | -0.04 | 0.1 |
| 2041   | EPHA1   | -0.04 | 0.8 |
| 9314   | KLF4    | -0.04 | 0.2 |
| 257218 | SHPRH   | -0.03 | 1.3 |
| 4921   | DDR2    | -0.03 | 0.2 |
| 2322   | FLT3    | -0.03 | 0.3 |
| 4507   | MTAP    | -0.01 | 0.2 |

|        |          |       |     |
|--------|----------|-------|-----|
| 284406 | ZFP82    | -0.01 | 1.0 |
| 57805  | CCAR2    | -0.01 | 0.5 |
| 9521   | EEF1E1   | -0.01 | 0.2 |
| 63035  | BCORL1   | -0.01 | 0.7 |
| 26136  | TES      | -0.01 | 0.6 |
| 283349 | RASSF3   | 0.00  | 0.3 |
| 3175   | ONECUT1  | 0.00  | 0.0 |
| 4499   | MT1M     | 0.01  | 0.3 |
| 1316   | KLF6     | 0.01  | 0.6 |
| 6924   | TCEB3    | 0.01  | 0.3 |
| 104    | ADARB1   | 0.01  | 0.2 |
| 51700  | CYB5R2   | 0.02  | 0.3 |
| 1786   | DNMT1    | 0.02  | 0.3 |
| 6294   | SAFB     | 0.02  | 0.3 |
| 1915   | EEF1A1   | 0.03  | 0.2 |
| 222236 | NAPEPLD  | 0.03  | 0.2 |
| 3880   | KRT19    | 0.03  | 0.7 |
| 8838   | WISP3    | 0.04  | 0.3 |
| 7429   | VIL1     | 0.04  | 0.2 |
| 11145  | PLA2G16  | 0.05  | 0.1 |
| 4221   | MEN1     | 0.05  | 0.8 |
| 84651  | SPINK7   | 0.05  | 0.3 |
| 22882  | ZHX2     | 0.05  | 0.4 |
| 29997  | GLTSCR2  | 0.05  | 0.9 |
| 171023 | ASXL1    | 0.06  | 0.4 |
| 55818  | KDM3A    | 0.07  | 0.3 |
| 4773   | NFATC2   | 0.07  | 0.3 |
| 7490   | WT1      | 0.07  | 0.3 |
| 1528   | CYB5A    | 0.07  | 0.3 |
| 4013   | VWA5A    | 0.07  | 0.3 |
| 55223  | TRIM62   | 0.08  | 0.2 |
| 5331   | PLCB3    | 0.08  | 0.1 |
| 56287  | GKN1     | 0.08  | 0.3 |
| 55544  | RBM38    | 0.08  | 0.5 |
| 114757 | CYGB     | 0.09  | 0.4 |
| 6929   | TCF3     | 0.09  | 0.5 |
| 8577   | TMEFF1   | 0.09  | 0.5 |
| 5101   | PCDH9    | 0.09  | 0.1 |
| 7799   | PRDM2    | 0.09  | 0.5 |
| 25855  | BRMS1    | 0.09  | 0.7 |
| 7056   | THBD     | 0.10  | 0.3 |
| 11080  | DNAJB4   | 0.10  | 0.5 |
| 4033   | LRMP     | 0.10  | 0.6 |
| 11068  | CYB561D2 | 0.10  | 0.1 |
| 6117   | RPA1     | 0.10  | 0.4 |
| 2271   | FH       | 0.11  | 0.1 |
| 2048   | EPHB2    | 0.11  | 0.3 |

|        |         |      |     |
|--------|---------|------|-----|
| 6664   | SOX11   | 0.11 | 0.2 |
| 51364  | ZMYND10 | 0.12 | 0.2 |
| 5906   | RAP1A   | 0.12 | 0.4 |
| 2103   | ESRRB   | 0.12 | 0.4 |
| 4045   | LSAMP   | 0.12 | 0.4 |
| 1612   | DAPK1   | 0.13 | 0.3 |
| 6595   | SMARCA2 | 0.13 | 0.1 |
| 383    | ARG1    | 0.13 | 0.1 |
| 201501 | ZBTB7C  | 0.13 | 0.5 |
| 283518 | KCNRG   | 0.13 | 1.0 |
| 259230 | SGMS1   | 0.13 | 0.6 |
| 8626   | TP63    | 0.13 | 0.1 |
| 7405   | UVRAG   | 0.14 | 0.7 |
| 1017   | CDK2    | 0.14 | 0.9 |
| 5625   | PRODH   | 0.14 | 0.3 |
| 23328  | SASH1   | 0.14 | 0.5 |
| 8453   | CUL2    | 0.14 | 0.7 |
| 130399 | ACVR1C  | 0.14 | 0.5 |
| 3428   | IFI16   | 0.15 | 0.9 |
| 6925   | TCF4    | 0.15 | 0.6 |
| 378708 | APITD1  | 0.15 | 0.5 |
| 4771   | NF2     | 0.16 | 0.3 |
| 580    | BARD1   | 0.16 | 0.2 |
| 5074   | PAWR    | 0.16 | 0.8 |
| 9429   | ABCG2   | 0.17 | 0.3 |
| 64478  | CSMD1   | 0.17 | 0.2 |
| 5573   | PRKAR1A | 0.17 | 0.5 |
| 26257  | NKX2-8  | 0.17 | 0.1 |
| 6416   | MAP2K4  | 0.18 | 0.4 |
| 9788   | MTSS1   | 0.18 | 0.4 |
| 219333 | USP12   | 0.18 | 0.7 |
| 3662   | IRF4    | 0.18 | 0.5 |
| 5936   | RBM4    | 0.18 | 0.3 |
| 8650   | NUMB    | 0.19 | 0.4 |
| 84700  | MYO18B  | 0.19 | 0.4 |
| 25792  | CIZ1    | 0.19 | 0.3 |
| 9255   | AIMP1   | 0.19 | 0.1 |
| 6678   | SPARC   | 0.19 | 0.2 |
| 6711   | SPTBN1  | 0.19 | 1.2 |
| 10562  | OLFM4   | 0.20 | 0.1 |
| 9988   | DMTF1   | 0.20 | 0.4 |
| 2309   | FOXO3   | 0.20 | 0.2 |
| 10769  | PLK2    | 0.20 | 0.6 |
| 27232  | GNMT    | 0.20 | 0.5 |
| 7158   | TP53BP1 | 0.21 | 0.2 |
| 8805   | TRIM24  | 0.21 | 0.8 |
| 27250  | PDCD4   | 0.21 | 0.4 |

|        |            |      |     |
|--------|------------|------|-----|
| 4897   | NRCAM      | 0.21 | 1.2 |
| 1027   | CDKN1B     | 0.22 | 0.4 |
| 401    | PHOX2A     | 0.22 | 0.9 |
| 11122  | PTPRT      | 0.22 | 0.2 |
| 2135   | EXTL2      | 0.22 | 0.3 |
| 249    | ALPL       | 0.22 | 0.7 |
| 6405   | SEMA3F     | 0.22 | 0.1 |
| 5276   | SERPINI2   | 0.23 | 0.1 |
| 5727   | PTCH1      | 0.23 | 0.3 |
| 5580   | PRKCD      | 0.23 | 0.3 |
| 6876   | TAGLN      | 0.24 | 0.6 |
| 581    | BAX        | 0.24 | 0.2 |
| 3685   | ITGAV      | 0.24 | 0.5 |
| 27302  | BMP10      | 0.24 | 0.2 |
| 90480  | GADD45GIP1 | 0.25 | 0.3 |
| 5080   | PAX6       | 0.25 | 0.2 |
| 56925  | LXN        | 0.25 | 0.1 |
| 10154  | PLXNC1     | 0.26 | 0.3 |
| 864    | RUNX3      | 0.26 | 0.9 |
| 80319  | CXXC4      | 0.26 | 0.2 |
| 5310   | PKD1       | 0.27 | 0.4 |
| 10817  | FRS3       | 0.27 | 0.6 |
| 7071   | KLF10      | 0.27 | 0.3 |
| 11334  | TUSC2      | 0.27 | 0.3 |
| 6850   | SYK        | 0.27 | 0.4 |
| 8856   | NR1I2      | 0.28 | 0.5 |
| 84911  | ZNF382     | 0.28 | 0.4 |
| 10152  | ABI2       | 0.28 | 0.1 |
| 835    | CASP2      | 0.29 | 0.2 |
| 141    | ADPRH      | 0.29 | 0.4 |
| 1843   | DUSP1      | 0.29 | 0.2 |
| 199731 | CADM4      | 0.29 | 0.3 |
| 54739  | XAF1       | 0.30 | 0.6 |
| 10018  | BCL2L11    | 0.30 | 0.4 |
| 9547   | CXCL14     | 0.30 | 0.5 |
| 1958   | EGR1       | 0.30 | 0.1 |
| 10950  | BTG3       | 0.30 | 0.3 |
| 2903   | GRIN2A     | 0.30 | 0.5 |
| 2013   | EMP2       | 0.30 | 0.2 |
| 22933  | SIRT2      | 0.30 | 0.4 |
| 1029   | CDKN2A     | 0.31 | 0.3 |
| 6389   | SDHA       | 0.31 | 0.2 |
| 8313   | AXIN2      | 0.31 | 0.1 |
| 286826 | LIN9       | 0.31 | 0.2 |
| 8454   | CUL1       | 0.31 | 0.8 |
| 26047  | CNTNAP2    | 0.31 | 0.3 |
| 7078   | TIMP3      | 0.32 | 0.1 |

|        |         |      |     |
|--------|---------|------|-----|
| 151742 | PPM1L   | 0.32 | 0.6 |
| 675    | BRCA2   | 0.32 | 0.5 |
| 1111   | CHEK1   | 0.32 | 0.1 |
| 83595  | SOX7    | 0.32 | 0.1 |
| 80012  | PHC3    | 0.33 | 0.9 |
| 5533   | PPP3CC  | 0.33 | 0.1 |
| 3732   | CD82    | 0.33 | 0.3 |
| 55840  | EAF2    | 0.33 | 0.1 |
| 5100   | PCDH8   | 0.33 | 0.2 |
| 55275  | VPS53   | 0.34 | 0.3 |
| 4928   | NUP98   | 0.34 | 0.1 |
| 9353   | SLIT2   | 0.34 | 0.1 |
| 3663   | IRF5    | 0.34 | 0.7 |
| 54984  | PINX1   | 0.34 | 0.5 |
| 545    | ATR     | 0.34 | 0.4 |
| 7428   | VHL     | 0.34 | 0.3 |
| 5037   | PEBP1   | 0.34 | 0.4 |
| 51339  | DACT1   | 0.35 | 1.1 |
| 60561  | RINT1   | 0.35 | 0.2 |
| 652    | BMP4    | 0.35 | 0.7 |
| 112858 | TP53RK  | 0.35 | 0.4 |
| 9656   | MDC1    | 0.35 | 0.2 |
| 1634   | DCN     | 0.35 | 0.5 |
| 137970 | UNC5D   | 0.35 | 0.1 |
| 4683   | NBN     | 0.35 | 0.2 |
| 64866  | CDCP1   | 0.36 | 0.3 |
| 5178   | PEG3    | 0.37 | 0.4 |
| 1028   | CDKN1C  | 0.37 | 0.4 |
| 2272   | FHIT    | 0.37 | 0.5 |
| 1959   | EGR2    | 0.37 | 0.3 |
| 114826 | SMYD4   | 0.37 | 0.6 |
| 8848   | TSC22D1 | 0.37 | 0.5 |
| 7431   | VIM     | 0.37 | 0.4 |
| 23410  | SIRT3   | 0.38 | 0.8 |
| 5629   | PROX1   | 0.38 | 0.2 |
| 644943 | RASSF10 | 0.39 | 0.5 |
| 220296 | HEPACAM | 0.39 | 0.3 |
| 5889   | RAD51C  | 0.39 | 0.3 |
| 1946   | EFNA5   | 0.39 | 0.2 |
| 11083  | DIDO1   | 0.40 | 1.8 |
| 51147  | ING4    | 0.40 | 0.4 |
| 90993  | CREB3L1 | 0.40 | 0.4 |
| 112858 | TP53RK  | 0.40 | 0.3 |
| 641    | BLM     | 0.41 | 0.6 |
| 301    | ANXA1   | 0.41 | 0.5 |
| 8312   | AXIN1   | 0.41 | 0.2 |
| 89870  | TRIM15  | 0.42 | 0.2 |

|        |         |      |     |
|--------|---------|------|-----|
| 140628 | GATA5   | 0.42 | 1.2 |
| 57107  | PDSS2   | 0.42 | 0.0 |
| 55749  | CCAR1   | 0.43 | 0.5 |
| 23221  | RHOBTB2 | 0.43 | 0.3 |
| 123879 | DCUN1D3 | 0.43 | 0.4 |
| 26608  | TBL2    | 0.43 | 0.7 |
| 9318   | COPS2   | 0.43 | 0.2 |
| 1847   | DUSP5   | 0.43 | 0.2 |
| 80198  | MUS81   | 0.43 | 0.4 |
| 6273   | S100A2  | 0.43 | 0.5 |
| 4118   | MAL     | 0.44 | 0.4 |
| 23189  | KANK1   | 0.44 | 0.2 |
| 665    | BNIP3L  | 0.44 | 0.2 |
| 146691 | TOM1L2  | 0.45 | 0.9 |
| 8190   | MIA     | 0.45 | 0.2 |
| 2100   | ESR2    | 0.46 | 0.4 |
| 4830   | NME1    | 0.46 | 0.1 |
| 10424  | PGRMC2  | 0.46 | 0.5 |
| 613    | BCR     | 0.47 | 0.3 |
| 54802  | TRIT1   | 0.47 | 0.3 |
| 26471  | NUPR1   | 0.47 | 0.4 |
| 2984   | GUCY2C  | 0.47 | 0.2 |
| 5078   | PAX4    | 0.47 | 0.5 |
| 23705  | CADM1   | 0.48 | 0.5 |
| 2779   | GNAT1   | 0.48 | 0.2 |
| 123920 | CMTM3   | 0.48 | 0.5 |
| 22807  | IKZF2   | 0.48 | 0.4 |
| 7067   | THRA    | 0.49 | 0.1 |
| 8772   | FADD    | 0.50 | 0.5 |
| 51343  | FZR1    | 0.50 | 0.2 |
| 7128   | TNFAIP3 | 0.50 | 0.0 |
| 5782   | PTPN12  | 0.50 | 0.3 |
| 112464 | PRKCDBP | 0.50 | 0.4 |
| 8635   | RNASET2 | 0.50 | 0.3 |
| 90427  | BMF     | 0.50 | 0.5 |
| 4436   | MSH2    | 0.50 | 0.6 |
| 54845  | ESRP1   | 0.51 | 0.1 |
| 11200  | CHEK2   | 0.51 | 0.6 |
| 3065   | HDAC1   | 0.51 | 0.4 |
| 23541  | SEC14L2 | 0.51 | 0.5 |
| 9046   | DOK2    | 0.51 | 0.4 |
| 406    | ARNTL   | 0.51 | 0.4 |
| 253738 | EBF3    | 0.52 | 0.2 |
| 1803   | DPP4    | 0.52 | 0.4 |
| 3487   | IGFBP4  | 0.52 | 0.6 |
| 55615  | PRR5    | 0.52 | 0.7 |
| 3170   | FOXA2   | 0.52 | 0.3 |

|        |         |      |      |
|--------|---------|------|------|
| 5325   | PLAGL1  | 0.53 | 0.5  |
| 8405   | SPOP    | 0.53 | 0.4  |
| 11337  | GABARAP | 0.53 | 0.5  |
| 5931   | RBBP7   | 0.54 | 0.3  |
| 91768  | CABLES1 | 0.54 | 0.2  |
| 65268  | WNK2    | 0.54 | 0.1  |
| 8930   | MBD4    | 0.54 | 0.2  |
| 7791   | ZYX     | 0.55 | 0.4  |
| 999    | CDH1    | 0.55 | 0.7  |
| 95     | ACY1    | 0.55 | 0.3  |
| 26298  | EHF     | 0.56 | 0.4  |
| 9076   | CLDN1   | 0.56 | 0.8  |
| 7020   | TFAP2A  | 0.57 | 0.1  |
| 26018  | LRIG1   | 0.57 | 0.2  |
| 5777   | PTPN6   | 0.57 | 0.2  |
| 2049   | EPHB3   | 0.57 | 0.5  |
| 11197  | WIF1    | 0.57 | 0.2  |
| 286319 | TUSC1   | 0.57 | 0.2  |
| 5655   | KLK10   | 0.58 | 0.20 |
| 55233  | MOB1A   | 0.58 | 0.5  |
| 1523   | CUX1    | 0.58 | 0.2  |
| 160728 | SLC5A8  | 0.58 | 0.2  |
| 9462   | RASAL2  | 0.59 | 0.6  |
| 4057   | LTF     | 0.59 | 0.4  |
| 54979  | HRASLS2 | 0.59 | 0.7  |
| 79930  | DOK3    | 0.60 | 0.3  |
| 112399 | EGLN3   | 0.60 | 0.3  |
| 23586  | DDX58   | 0.60 | 0.3  |
| 867    | CBL     | 0.60 | 0.5  |
| 847    | CAT     | 0.60 | 1.4  |
| 65979  | PHACTR4 | 0.60 | 0.1  |
| 8554   | PIAS1   | 0.60 | 0.4  |
| 324    | APC     | 0.60 | 0.6  |
| 3622   | ING2    | 0.60 | 0.2  |
| 57863  | CADM3   | 0.61 | 0.2  |
| 5337   | PLD1    | 0.61 | 0.2  |
| 50486  | GOS2    | 0.61 | 0.1  |
| 57509  | MTUS1   | 0.61 | 0.4  |
| 84260  | TCHP    | 0.61 | 0.3  |
| 27303  | RBMS3   | 0.61 | 0.2  |
| 5781   | PTPN11  | 0.62 | 0.2  |
| 10399  | GNB2L1  | 0.62 | 0.4  |
| 1003   | CDH5    | 0.63 | 0.1  |
| 9937   | DCLRE1A | 0.64 | 0.3  |
| 10077  | TSPAN32 | 0.64 | 0.4  |
| 83719  | YPEL3   | 0.64 | 0.1  |
| 149628 | PYHIN1  | 0.64 | 0.0  |



|        |         |      |     |
|--------|---------|------|-----|
| 1490   | CTGF    | 0.64 | 0.4 |
| 25898  | RCHY1   | 0.64 | 0.6 |
| 3400   | ID4     | 0.64 | 0.2 |
| 892    | CCNC    | 0.65 | 0.6 |
| 27075  | TSPAN13 | 0.65 | 0.2 |
| 1869   | E2F1    | 0.66 | 0.5 |
| 857    | CAV1    | 0.66 | 0.3 |
| 7045   | TGFBI   | 0.67 | 0.2 |
| 889    | KRIT1   | 0.67 | 0.2 |
| 27429  | HTRA2   | 0.67 | 0.1 |
| 30845  | EHD3    | 0.68 | 0.5 |
| 9590   | AKAP12  | 0.68 | 0.2 |
| 57599  | WDR48   | 0.68 | 0.9 |
| 3482   | IGF2R   | 0.68 | 0.5 |
| 231    | AKR1B1  | 0.68 | 0.3 |
| 5347   | PLK1    | 0.68 | 0.4 |
| 2051   | EPHB6   | 0.68 | 0.5 |
| 2273   | FHL1    | 0.69 | 0.1 |
| 1825   | DSC3    | 0.69 | 0.2 |
| 116135 | LRRC3B  | 0.69 | 0.3 |
| 29998  | GLTSCR1 | 0.69 | 0.7 |
| 57659  | ZBTB4   | 0.70 | 0.1 |
| 7128   | TNFAIP3 | 0.70 | 0.6 |
| 8100   | IFT88   | 0.70 | 0.4 |
| 11228  | RASSF8  | 0.71 | 0.7 |
| 26038  | CHD5    | 0.71 | 0.1 |
| 167465 | ZNF366  | 0.71 | 0.4 |
| 64753  | CCDC136 | 0.71 | 0.9 |
| 3091   | HIF1A   | 0.71 | 0.1 |
| 23261  | CAMTA1  | 0.72 | 0.4 |
| 8744   | TNFSF9  | 0.72 | 0.2 |
| 4149   | MAX     | 0.73 | 0.3 |
| 23336  | SYNM    | 0.73 | 1.1 |
| 57447  | NDRG2   | 0.73 | 0.5 |
| 6794   | STK11   | 0.74 | 0.4 |
| 10432  | RBM14   | 0.75 | 0.7 |
| 79831  | KDM8    | 0.76 | 0.1 |
| 51780  | KDM3B   | 0.76 | 0.2 |
| 638    | BIK     | 0.76 | 0.2 |
| 10409  | BASP1   | 0.77 | 0.3 |
| 25833  | POU2F3  | 0.77 | 0.3 |
| 8711   | TNK1    | 0.77 | 1.0 |
| 373863 | DND1    | 0.78 | 0.2 |
| 4804   | NGFR    | 0.78 | 0.2 |
| 83989  | FAM172A | 0.78 | 0.8 |
| 7462   | LAT2    | 0.79 | 0.4 |
| 1045   | CDX2    | 0.79 | 0.6 |

|        |           |      |     |
|--------|-----------|------|-----|
| 51237  | MZB1      | 0.79 | 0.1 |
| 10397  | NDRG1     | 0.79 | 0.2 |
| 9486   | CHST10    | 0.79 | 0.1 |
| 3679   | ITGA7     | 0.79 | 0.2 |
| 8788   | DLK1      | 0.79 | 0.9 |
| 467    | ATF3      | 0.80 | 0.6 |
| 57111  | RAB25     | 0.80 | 0.2 |
| 57167  | SALL4     | 0.80 | 0.4 |
| 84295  | PHF6      | 0.81 | 0.7 |
| 7161   | TP73      | 0.81 | 0.3 |
| 6934   | TCF7L2    | 0.81 | 0.5 |
| 4851   | NOTCH1    | 0.81 | 0.4 |
| 8643   | PTCH2     | 0.82 | 0.6 |
| 4303   | FOXO4     | 0.82 | 0.2 |
| 196    | AHR       | 0.82 | 0.4 |
| 2972   | BRF1      | 0.82 | 0.9 |
| 10633  | RASL10A   | 0.82 | 0.2 |
| 3090   | HIC1      | 0.82 | 0.0 |
| 401494 | HACD4     | 0.83 | 0.5 |
| 2120   | ETV6      | 0.83 | 0.3 |
| 54206  | ERRFI1    | 0.83 | 0.3 |
| 1540   | CYLD      | 0.84 | 0.2 |
| 7053   | TGM3      | 0.84 | 0.3 |
| 11186  | RASSF1    | 0.84 | 0.2 |
| 27022  | FOXD3     | 0.85 | 0.1 |
| 253559 | CADM2     | 0.85 | 0.4 |
| 79791  | FBXO31    | 0.85 | 0.5 |
| 4824   | NKX3-1    | 0.86 | 0.6 |
| 1474   | CST6      | 0.86 | 0.6 |
| 121227 | LRIG3     | 0.87 | 0.6 |
| 51196  | PLCE1     | 0.88 | 0.1 |
| 5887   | RAD23B    | 0.88 | 0.2 |
| 387    | RHOA      | 0.88 | 1.0 |
| 92335  | STRADA    | 0.89 | 0.5 |
| 159989 | CCDC67    | 0.89 | 0.9 |
| 5562   | PRKAA1    | 0.89 | 0.3 |
| 55966  | AJAP1     | 0.90 | 0.5 |
| 27316  | RBMX      | 0.90 | 0.2 |
| 8678   | BECN1     | 0.90 | 0.4 |
| 152573 | SHISA3    | 0.90 | 0.3 |
| 6125   | RPL5      | 0.91 | 0.4 |
| 55124  | PIWIL2    | 0.91 | 0.2 |
| 8797   | TNFRSF10A | 0.91 | 0.1 |
| 8437   | RASAL1    | 0.91 | 0.1 |
| 672    | BRCA1     | 0.91 | 0.4 |
| 5920   | RARRES3   | 0.92 | 0.4 |
| 11281  | POU6F2    | 0.92 | 0.3 |

|        |          |      |     |
|--------|----------|------|-----|
| 274    | BIN1     | 0.92 | 0.3 |
| 2316   | FLNA     | 0.92 | 0.2 |
| 7044   | LEFTY2   | 0.92 | 0.3 |
| 201163 | FLCN     | 0.92 | 0.3 |
| 6997   | TDGF1    | 0.93 | 0.4 |
| 1147   | CHUK     | 0.93 | 0.5 |
| 116071 | BATF2    | 0.93 | 0.5 |
| 137075 | CLDN23   | 0.93 | 0.3 |
| 142    | PARP1    | 0.94 | 0.3 |
| 4292   | MLH1     | 0.95 | 0.2 |
| 861    | RUNX1    | 0.95 | 0.1 |
| 429    | ASCL1    | 0.97 | 0.1 |
| 23405  | DICER1   | 0.97 | 0.1 |
| 5516   | PPP2CB   | 0.97 | 0.6 |
| 8651   | SOCS1    | 0.98 | 1.4 |
| 29959  | NRBP1    | 0.98 | 0.8 |
| 6672   | SP100    | 0.99 | 0.0 |
| 10514  | MYBBP1A  | 1.00 | 0.2 |
| 4856   | NOV      | 1.00 | 0.2 |
| 1105   | CHD1     | 1.00 | 0.1 |
| 1473   | CST5     | 1.00 | 0.3 |
| 5268   | SERPINB5 | 1.00 | 0.4 |
| 7270   | TTF1     | 1.00 | 0.1 |
| 10181  | RBM5     | 1.01 | 0.2 |
| 29914  | UBIAD1   | 1.02 | 0.6 |
| 822    | CAPG     | 1.02 | 0.2 |
| 127700 | OSCP1    | 1.02 | 0.3 |
| 1036   | CDO1     | 1.02 | 0.3 |
| 27165  | GLS2     | 1.03 | 0.0 |
| 90249  | UNC5A    | 1.04 | 0.7 |
| 1021   | CDK6     | 1.04 | 0.2 |
| 8013   | NR4A3    | 1.04 | 0.3 |
| 9141   | PDCD5    | 1.04 | 0.0 |
| 60401  | EDA2R    | 1.04 | 0.4 |
| 27122  | DKK3     | 1.05 | 0.2 |
| 2619   | GAS1     | 1.05 | 0.4 |
| 10217  | CTDSPL   | 1.05 | 0.3 |
| 54756  | IL17RD   | 1.05 | 0.3 |
| 79192  | IRX1     | 1.05 | 0.1 |
| 6135   | RPL11    | 1.05 | 0.7 |
| 1870   | E2F2     | 1.06 | 0.1 |
| 27129  | HSPB7    | 1.06 | 0.3 |
| 5241   | PGR      | 1.07 | 0.3 |
| 114907 | FBXO32   | 1.08 | 0.1 |
| 27086  | FOXP1    | 1.08 | 0.4 |
| 140690 | CTCF     | 1.08 | 0.1 |
| 7474   | WNT5A    | 1.09 | 0.2 |

|        |           |      |      |
|--------|-----------|------|------|
| 9365   | KL        | 1.09 | 0.1  |
| 1009   | CDH11     | 1.10 | 0.2  |
| 94031  | HTRA3     | 1.11 | 0.32 |
| 84525  | HOPX      | 1.12 | 0.5  |
| 6776   | STAT5A    | 1.12 | 0.5  |
| 6502   | SKP2      | 1.12 | 0.5  |
| 9538   | EI24      | 1.13 | 0.3  |
| 7704   | ZBTB16    | 1.14 | 0.3  |
| 2296   | FOXC1     | 1.14 | 0.4  |
| 920    | CD4       | 1.15 | 0.2  |
| 4869   | NPM1      | 1.15 | 0.1  |
| 5728   | PTEN      | 1.16 | 0.3  |
| 50514  | DELEC1    | 1.17 | 0.4  |
| 3014   | H2AFX     | 1.17 | 0.1  |
| 29117  | BRD7      | 1.20 | 0.4  |
| 5499   | PPP1CA    | 1.21 | 0.7  |
| 49860  | CRNN      | 1.21 | 0.3  |
| 80023  | NRSN2     | 1.22 | 0.5  |
| 54971  | BANP      | 1.22 | 0.5  |
| 2952   | GSTT1     | 1.22 | 0.2  |
| 1326   | MAP3K8    | 1.23 | 0.7  |
| 10912  | GADD45G   | 1.24 | 0.4  |
| 10048  | RANBP9    | 1.24 | 0.2  |
| 6774   | STAT3     | 1.25 | 0.1  |
| 6134   | RPL10     | 1.25 | 0.2  |
| 64682  | ANAPC1    | 1.26 | 0.0  |
| 8864   | PER2      | 1.26 | 0.1  |
| 144165 | PRICKLE1  | 1.26 | 0.3  |
| 3659   | IRF1      | 1.26 | 0.3  |
| 79365  | BHLHE41   | 1.26 | 0.4  |
| 4163   | MCC       | 1.28 | 0.5  |
| 83937  | RASSF4    | 1.28 | 0.3  |
| 634    | CEACAM1   | 1.28 | 0.8  |
| 246    | ALOX15    | 1.29 | 0.3  |
| 5316   | PKNOX1    | 1.29 | 0.7  |
| 1789   | DNMT3B    | 1.30 | 0.1  |
| 5300   | PIN1      | 1.30 | 0.2  |
| 23635  | SSBP2     | 1.30 | 0.2  |
| 3490   | IGFBP7    | 1.31 | 0.2  |
| 10335  | MRVI1     | 1.32 | 0.1  |
| 3996   | LLGL1     | 1.33 | 0.2  |
| 51330  | TNFRSF12A | 1.33 | 0.2  |
| 57727  | NCOA5     | 1.33 | 0.6  |
| 6898   | TAT       | 1.34 | 0.1  |
| 3651   | PDX1      | 1.34 | 0.4  |
| 54583  | EGLN1     | 1.35 | 0.3  |
| 79728  | PALB2     | 1.37 | 0.2  |

|        |         |      |      |
|--------|---------|------|------|
| 5579   | PRKCB   | 1.39 | 2.1  |
| 7476   | WNT7A   | 1.39 | 0.1  |
| 9667   | SAFB2   | 1.40 | 0.2  |
| 9025   | RNF8    | 1.40 | 0.6  |
| 9516   | LITAF   | 1.42 | 0.6  |
| 3483   | IGFALS  | 1.42 | 0.1  |
| 10019  | SH2B3   | 1.42 | 0.3  |
| 4485   | MST1    | 1.43 | 0.4  |
| 51720  | UIMC1   | 1.44 | 0.2  |
| 23560  | GTPBP4  | 1.44 | 0.8  |
| 1801   | DPH1    | 1.44 | 0.7  |
| 563    | AZGP1   | 1.45 | 0.9  |
| 5932   | RBBP8   | 1.45 | 0.1  |
| 10413  | YAP1    | 1.46 | 0.2  |
| 7040   | TGFB1   | 1.46 | 0.2  |
| 1871   | E2F3    | 1.46 | 0.3  |
| 5653   | KLK6    | 1.47 | 0.22 |
| 11074  | TRIM31  | 1.47 | 1.8  |
| 4790   | NFKB1   | 1.47 | 0.2  |
| 1052   | CEBPD   | 1.48 | 0.4  |
| 9021   | SOCS3   | 1.49 | 0.8  |
| 9781   | RNF144A | 1.51 | 0.6  |
| 5245   | PHB     | 1.51 | 0.0  |
| 64101  | LRRC4   | 1.53 | 0.2  |
| 57758  | SCUBE2  | 1.56 | 0.4  |
| 3814   | KISS1   | 1.57 | 0.2  |
| 5654   | HTRA1   | 1.58 | 0.4  |
| 8854   | ALDH1A2 | 1.60 | 0.5  |
| 374654 | KIF7    | 1.61 | 0.3  |
| 1452   | CSNK1A1 | 1.61 | 0.1  |
| 5494   | PPM1A   | 1.62 | 0.5  |
| 7290   | HIRA    | 1.62 | 0.4  |
| 79759  | ZNF668  | 1.63 | 0.6  |
| 55294  | FBXW7   | 1.64 | 0.3  |
| 23035  | PHLPP2  | 1.65 | 0.1  |
| 4486   | MST1R   | 1.67 | 1.1  |
| 860    | RUNX2   | 1.67 | 0.3  |
| 3104   | ZBTB48  | 1.69 | 0.6  |
| 2137   | EXTL3   | 1.70 | 0.4  |
| 55450  | CAMK2N1 | 1.70 | 0.6  |
| 6425   | SFRP5   | 1.70 | 0.5  |
| 5411   | PNN     | 1.73 | 0.2  |
| 6196   | RPS6KA2 | 1.73 | 0.1  |
| 5796   | PTPRK   | 1.76 | 0.3  |
| 7057   | THBS1   | 1.80 | 0.8  |
| 79577  | CDC73   | 1.80 | 0.2  |
| 26585  | GREM1   | 1.80 | 0.2  |

|        |         |      |      |
|--------|---------|------|------|
| 1654   | DDX3X   | 1.82 | 0.1  |
| 6423   | SFRP2   | 1.85 | 0.2  |
| 4627   | MYH9    | 1.85 | 0.4  |
| 10206  | TRIM13  | 1.90 | 0.3  |
| 23087  | TRIM35  | 1.91 | 0.2  |
| 164656 | TMPRSS6 | 1.97 | 0.3  |
| 27030  | MLH3    | 2.00 | 0.2  |
| 6764   | ST5     | 2.03 | 0.20 |
| 4082   | MARCKS  | 2.14 | 0.4  |
| 2735   | GLI1    | 2.22 | 0.9  |
| 10664  | CTCF    | 2.27 | 0.0  |
| 54790  | TET2    | 2.38 | 0.4  |
| 148252 | DIRAS1  | 2.38 | 0.3  |
| 6665   | SOX15   | 2.41 | 0.2  |
| 6598   | SMARCB1 | 2.49 | 0.3  |
| 56666  | PANX2   | 2.50 | 0.2  |
| 6599   | SMARCC1 | 2.80 | 0.7  |
| 23468  | CBX5    | 2.92 | 0.7  |
| 1910   | EDNRB   | 4.27 | 0.5  |

**Supplementary Table. 2 Genes scored in phosphoproteomics, related to Figure 6 and Figure 7**

Raw data of phosphoproteomics are available with the following orders;

| DATA SET NO. | NOTE                                                                                                                                                                                                                                                  |
|--------------|-------------------------------------------------------------------------------------------------------------------------------------------------------------------------------------------------------------------------------------------------------|
| 1            | phosphosites downregulated in shDAPK3#1 cells (420 genes)(P<0.05, log2FC<-0.4)                                                                                                                                                                        |
| 2            | phosphosites downregulated in shTBK1#1 cells (887 genes)(P<0.05, log2FC<-0.4)                                                                                                                                                                         |
| 3            | phosphosites downregulated in both shDAPK3#1 and shTBK1#1 cells (301 genes)(P<0.05, log2FC<-0.4)                                                                                                                                                      |
| 4            | phosphosites downregulated in shDAPK3#1 cells and shTBK1#1 cells at different phosphosite(s) in the same protein(29 genes) (P<0.05, log2FC<-0.4)                                                                                                      |
|              | blue; P<0.05, log2FC<-0.4 for shDAPK3#1<br>yellow; P<0.05, log2FC<-0.4 for shTBK1#1                                                                                                                                                                   |
| 5            | phosphosites downregulated at DAPK3 consensus site (R/K-X-X-S/T) in shDAPK3#1 cells(165 genes) (P<0.05, log2FC<-0.4)                                                                                                                                  |
|              | 16 proteins in red character have phosphosites corresponds to both DAPK3 consensus and IKK consensus (S-X-X-X-S/T)                                                                                                                                    |
| 6            | E3 ligases which phosphorylation were downregulated at DAPK3 consensus site (R/K-X-X-S/T) in shDAPK3#1 cells and/or shTBK1#1 cells<br>*; P<0.05, log2FC<-0.4 for shDAPK3#1, \$; P<0.1, log2FC<-0.4 for shDAPK3#1, #; P<0.05, log2FC<-0.4 for shTBK1#1 |

1. Phosphotases downregulated in shDAPK3#1 cells (420 genes) (P<0.05, log2FC<-0.4)

| Unique_ID_REAL                    | Protein_ID | Gene    | Gene_ID | Description                         | Prot_Loc    | PTM_Score         | Flank_Seq                                              | shControl                    | shControl | shDAPK3# | shDAPK3# | shDAPK3# | shDAPK3# | shControl | FC       | F-test   | P-value  | LogOR    | LogFC    |          |          |          |          |          |          |          |
|-----------------------------------|------------|---------|---------|-------------------------------------|-------------|-------------------|--------------------------------------------------------|------------------------------|-----------|----------|----------|----------|----------|-----------|----------|----------|----------|----------|----------|----------|----------|----------|----------|----------|----------|----------|
| AA088WTT2_1s5TDDGYDLOK_S2_S3_T4_1 | AA088WTT2  | TMEM230 | 29058   | Transmembrane protein 230           | S23.524.125 | 32.81;32.81;32.81 | KVYSRLSSSTDDGYD...KVYSRLSSSTDDGYD...KVYSRLSSSTDDGYD... | 0.178482                     | 0.244887  | 0.179319 | 0.110008 | 0.098079 | 0.142562 | 0.100760  | 0.581292 | 0.020896 | 0.581292 | 0.534659 | -0.78109 |          |          |          |          |          |          |          |
| AA088WXR8_rRfQDTGQK_S3_1          | AA088WXR8  | ZCCHC17 | 51538   | zinc finger CCHC-type containing 17 | S136        |                   | 89.21                                                  | RRRRRRSFFDYGTQ               |           |          |          |          |          |           | 0.363187 | 0.298686 | 0.320236 | 0.176035 | 0.243942 | 0.172443 | 0.197473 | 0.326763 | 0.604332 | 0.821674 | 0.012981 | -0.72659 |
| AA088X1R1_1s5FGVFNANSK_S3_1       | AA088X1R1  | SMTN    | 6525    | Smoothelin                          | S875        |                   | 94.39                                                  | PRAAVRRSTFGFVNP              |           |          |          |          |          |           | 0.397225 | 0.278898 | 0.327075 | 0.161737 | 0.252951 | 0.188415 | 0.20095  | 0.334399 | 0.600527 | 0.767194 | 0.038035 | -0.73474 |
| AA088X1R1_1s5FGVFNANSK_S3_1       | AA088X1R1  | SMTN    | 6525    | Smoothelin                          | S877        |                   | 92.14                                                  | TSYRSKSLSSVQVFN              |           |          |          |          |          |           | 0.261246 | 0.255648 | 0.336669 | 0.140623 | 0.216575 | 0.154623 | 0.247649 | 0.664741 | 0.319129 | 0.042928 | -0.58914 |          |
| AA088X2D8_KRSTLSQLQGD_S3_1        | AA088X2D8  | SPAG9   | 9043    | sperm associated antigen 9          | S584        |                   | 94.23                                                  | AAVYVQSTADIFDQ               |           |          |          |          |          |           | 0.205292 | 0.198959 | 0.178189 | 0.121135 | 0.143717 | 0.122428 | 0.129093 | 0.194146 | 0.664928 | 0.888918 | 0.004069 | -0.58873 |
| AA08896LCS_IVQSDAIDGDEEGLFK_S4_1  | AA08896LCS | WASH2C2 | 253725  | WASH complex subunit 2C             | S478        |                   | 94.98                                                  | SKTRVQSTADIFDQ               |           |          |          |          |          |           | 0.198002 | 0.229524 | 0.216204 | 0.129463 | 0.136937 | 0.138133 | 0.134844 | 0.214498 | 0.628649 | 0.21544  | 0.000648 | -0.66567 |
| AA08896LCS_IVQSDAIDGDEEGLFK_S4_1  | AA08896LCS | WASH2C2 | 253725  | WASH complex subunit 2C             | S478        |                   | 91.44                                                  | SKTRVQSTADIFDQ               |           |          |          |          |          |           | 0.226889 | 0.192276 | 0.200855 | 0.095639 | 0.112244 | 0.104536 | 0.10414  | 0.206667 | 0.503903 | 0.350889 | 0.000862 | -0.98878 |
| AA08896LCS_IVQSDAIDGDEEGLFK_S4_1  | AA08896LCS | WASH2C2 | 253725  | WASH complex subunit 2C             | S478.7479   | 50.50             |                                                        | SKTRVQSTADIFDQ.KTRVQSTADIFDQ |           |          |          |          |          |           | 0.238333 | 0.187364 | 0.229894 | 0.11232  | 0.11143  | 0.081297 | 0.101682 | 0.21853  | 0.465301 | 0.589439 | 0.003398 | -1.10376 |
| AA08896LCS_IVQSDAIDGDEEGLFK_S4_1  | AA08896LCS | WASH2C2 | 253725  | WASH complex subunit 2C             | S836        |                   | 95.49                                                  | DDPDAVQSTVFQDE               |           |          |          |          |          |           | 0.219783 | 0.218866 | 0.203679 | 0.109032 | 0.113006 | 0.107402 | 0.109003 | 0.214109 | 0.5091   | 0.546264 | 0.01E-05 | -0.97398 |
| AA08896LCS_IVQSDAIDGDEEGLFK_S4_1  | AA08896LCS | WASH2C2 | 253725  | WASH complex subunit 2C             | S836        |                   | 95.49                                                  | DDPDAVQSTVFQDE               |           |          |          |          |          |           | 0.289189 | 0.288845 | 0.253498 | 0.150135 | 0.164336 | 0.187157 | 0.16721  | 0.25015  | 0.618126 | 0.957715 | 0.002294 | -0.69403 |
| AA08896LCS_IVQSDAIDGDEEGLFK_S4_1  | AA08896LCS | WASH2C2 | 253725  | WASH complex subunit 2C             | S836        |                   | 95.49                                                  | DDPDAVQSTVFQDE               |           |          |          |          |          |           | 0.265911 | 0.268107 | 0.303135 | 0.144708 | 0.162085 | 0.219076 | 0.17529  | 0.279051 | 0.628164 | 0.447508 | 0.01522  | -0.67079 |
| AA08896LCS_IVQSDAIDGDEEGLFK_S4_1  | AA08896LCS | WASH2C2 | 253725  | WASH complex subunit 2C             | S836        |                   | 95.49                                                  | DDPDAVQSTVFQDE               |           |          |          |          |          |           | 0.266714 | 0.295254 | 0.30297  | 0.239191 | 0.155389 | 0.212484 | 0.202348 | 0.288833 | 0.701835 | 0.331847 | 0.03675  | -0.5108  |
| AA08896LCS_IVQSDAIDGDEEGLFK_S4_1  | AA08896LCS | WASH2C2 | 253725  | WASH complex subunit 2C             | S836        |                   | 95.49                                                  | DDPDAVQSTVFQDE               |           |          |          |          |          |           | 0.227267 | 0.184602 | 0.197609 | 0.149224 | 0.159351 | 0.134062 | 0.146345 | 0.20226  | 0.273553 | 0.765073 | 0.01502  | -0.46683 |
| AA08896LCS_IVQSDAIDGDEEGLFK_S4_1  | AA08896LCS | WASH2C2 | 253725  | WASH complex subunit 2C             | S836        |                   | 95.49                                                  | DDPDAVQSTVFQDE               |           |          |          |          |          |           | 0.219165 | 0.180648 | 0.235574 | 0.150811 | 0.169757 | 0.1403   | 0.153623 | 0.208462 | 0.756933 | 0.54799  | 0.019092 | -0.4004  |
| AA08896LCS_IVQSDAIDGDEEGLFK_S4_1  | AA08896LCS | WASH2C2 | 253725  | WASH complex subunit 2C             | S836        |                   | 95.49                                                  | DDPDAVQSTVFQDE               |           |          |          |          |          |           | 0.196017 | 0.197445 | 0.162172 | 0.146304 | 0.11476  | 0.135996 | 0.132354 | 0.185211 | 0.714608 | 0.787164 | 0.023356 | -0.48478 |
| AA08896LCS_IVQSDAIDGDEEGLFK_S4_1  | AA08896LCS | WASH2C2 | 253725  | WASH complex subunit 2C             | S836        |                   | 95.49                                                  | DDPDAVQSTVFQDE               |           |          |          |          |          |           | 0.223186 | 0.215024 | 0.219122 | 0.146726 | 0.131888 | 0.140124 | 0.139579 | 0.231141 | 0.603872 | 0.310137 | 0.01009  | -0.72769 |
| AA08896LCS_IVQSDAIDGDEEGLFK_S4_1  | AA08896LCS | WASH2C2 | 253725  | WASH complex subunit 2C             | S836        |                   | 95.49                                                  | DDPDAVQSTVFQDE               |           |          |          |          |          |           | 0.197406 | 0.207126 | 0.220715 | 0.143546 | 0.146863 | 0.152173 | 0.147528 | 0.204427 | 0.707814 | 0.242831 | 0.001076 | -0.49856 |
| AA08896LCS_IVQSDAIDGDEEGLFK_S4_1  | AA08896LCS | WASH2C2 | 253725  | WASH complex subunit 2C             | S836        |                   | 95.49                                                  | DDPDAVQSTVFQDE               |           |          |          |          |          |           | 0.234911 | 0.222615 | 0.174126 | 0.145943 | 0.08133  | 0.104205 | 0.110382 | 0.20554  | 0.524485 | 0.980295 | 0.019478 | -0.93103 |
| AA08896LCS_IVQSDAIDGDEEGLFK_S4_1  | AA08896LCS | WASH2C2 | 253725  | WASH complex subunit 2C             | S836        |                   | 95.49                                                  | DDPDAVQSTVFQDE               |           |          |          |          |          |           | 0.283318 | 0.231699 | 0.266543 | 0.161384 | 0.146617 | 0.150938 | 0.152979 | 0.26052  | 0.587207 | 0.153507 | 0.002447 | -0.78006 |
| AA08896LCS_IVQSDAIDGDEEGLFK_S4_1  | AA08896LCS | WASH2C2 | 253725  | WASH complex subunit 2C             | S836        |                   | 95.49                                                  | DDPDAVQSTVFQDE               |           |          |          |          |          |           | 0.228693 | 0.215398 | 0.203023 | 0.107085 | 0.156602 | 0.133511 | 0.123399 | 0.21675  | 0.613799 | 0.423266 | 0.006649 | -0.70416 |
| AA08896LCS_IVQSDAIDGDEEGLFK_S4_1  | AA08896LCS | WASH2C2 | 253725  | WASH complex subunit 2C             | S836        |                   | 95.49                                                  | DDPDAVQSTVFQDE               |           |          |          |          |          |           | 0.168365 | 0.174082 | 0.213441 | 0.119053 | 0.131967 | 0.147384 | 0.132801 | 0.185296 | 0.166988 | 0.500803 | 0.032661 | -0.49936 |
| AA08896LCS_IVQSDAIDGDEEGLFK_S4_1  | AA08896LCS | WASH2C2 | 253725  | WASH complex subunit 2C             | S836        |                   | 95.49                                                  | DDPDAVQSTVFQDE               |           |          |          |          |          |           | 0.190221 | 0.221815 | 0.183485 | 0.130653 | 0.172232 | 0.133871 | 0.130586 | 0.19729  | 0.661895 | 0.063135 | 0.003477 | -0.58053 |
| AA08896LCS_IVQSDAIDGDEEGLFK_S4_1  | AA08896LCS | WASH2C2 | 253725  | WASH complex subunit 2C             | S836        |                   | 95.49                                                  | DDPDAVQSTVFQDE               |           |          |          |          |          |           | 0.103660 | 0.110077 | 0.190721 | 0.100443 | 0.061101 | 0.092479 | 0.084674 | 0.332564 | 0.332564 | 0.009127 | -1.57663 |          |
| AA08896LCS_IVQSDAIDGDEEGLFK_S4_1  | AA08896LCS | WASH2C2 | 253725  | WASH complex subunit 2C             | S836        |                   | 95.49                                                  | DDPDAVQSTVFQDE               |           |          |          |          |          |           | 0.255092 | 0.211192 | 0.264223 | 0.174002 | 0.15559  | 0.177616 | 0.169069 | 0.266866 | 0.639609 | 0.886064 | 0.000674 | -0.65833 |
| AA08896LCS_IVQSDAIDGDEEGLFK_S4_1  | AA08896LCS | WASH2C2 | 253725  | WASH complex subunit 2C             | S836        |                   | 95.49                                                  | DDPDAVQSTVFQDE               |           |          |          |          |          |           | 0.288913 | 0.221922 | 0.228656 | 0.151452 | 0.152211 | 0.159534 | 0.159349 | 0.225656 | 0.579694 | 0.900094 | 0.00119  | -0.57225 |
| AA08896LCS_IVQSDAIDGDEEGLFK_S4_1  | AA08896LCS | WASH2C2 | 253725  | WASH complex subunit 2C             | S836        |                   | 95.49                                                  | DDPDAVQSTVFQDE               |           |          |          |          |          |           | 0.178038 | 0.173784 | 0.156676 | 0.148958 | 0.095771 | 0.108886 | 0.118772 | 0.164939 | 0.695411 | 0.285496 | 0.004417 | -0.52406 |
| AA08896LCS_IVQSDAIDGDEEGLFK_S4_1  | AA08896LCS | WASH2C2 | 253725  | WASH complex subunit 2C             | S836        |                   | 95.49                                                  | DDPDAVQSTVFQDE               |           |          |          |          |          |           | 0.180777 | 0.183357 | 0.153763 | 0.144933 | 0.095594 | 0.109166 | 0.116564 | 0.172632 | 0.675217 | 0.585187 | 0.032758 | -0.56568 |
| AA08896LCS_IVQSDAIDGDEEGLFK_S4_1  | AA08896LCS | WASH2C2 | 253725  | WASH complex subunit 2C             | S836        |                   | 95.49                                                  | DDPDAVQSTVFQDE               |           |          |          |          |          |           | 0.150521 | 0.18226  | 0.15552  | 0.129521 | 0.086972 | 0.130229 | 0.116174 | 0.164267 | 0.707226 | 0.549486 | 0.04873  | -0.49976 |
| AA08896LCS_IVQSDAIDGDEEGLFK_S4_1  | AA08896LCS | WASH2C2 | 253725  | WASH complex subunit 2C             | S836        |                   | 95.49                                                  | DDPDAVQSTVFQDE               |           |          |          |          |          |           | 0.192458 | 0.214613 | 0.166598 | 0.104156 | 0.113495 | 0.12441  | 0.11402  | 0.191223 | 0.596268 | 0.302113 | 0.00683  | -0.74597 |
| AA08896LCS_IVQSDAIDGDEEGLFK_S4_1  | AA08896LCS | WASH2C2 | 253725  | WASH complex subunit 2C             | S836        |                   | 95.49                                                  | DDPDAVQSTVFQDE               |           |          |          |          |          |           | 0.19123  | 0.217547 | 0.201445 | 0.141128 | 0.164069 | 0.173002 | 0.1474   | 0.203407 | 0.724653 | 0.905825 | 0.007927 | -0.46464 |
| AA08896LCS_IVQSDAIDGDEEGLFK_S4_1  | AA08896LCS | WASH2C2 | 253725  | WASH complex subunit 2C             | S836        |                   | 95.49                                                  | DDPDAVQSTVFQDE               |           |          |          |          |          |           | 0.199978 | 0.244117 | 0.191094 | 0.105161 | 0.145804 | 0.157277 | 0.136081 | 0.211729 | 0.64271  | 0.963882 | 0.029343 | -0.6776  |
| AA08896LCS_IVQSDAIDGDEEGLFK_S4_1  | AA08896LCS | WASH2C2 | 253725  | WASH complex subunit 2C             | S836        |                   | 95.49                                                  | DDPDAVQSTVFQDE               |           |          |          |          |          |           | 0.196688 | 0.229597 | 0.271029 | 0.142835 | 0.148003 | 0.153594 | 0.14761  | 0.161005 | 0.665367 | 0.129442 | 0.007731 | -0.54927 |
| AA08896LCS_IVQSDAIDGDEEGLFK_S4_1  | AA08896LCS | WASH2C2 | 253725  | WASH complex subunit 2C             | S836        |                   | 95.49                                                  | DDPDAVQSTVFQDE               |           |          |          |          |          |           | 0.172451 | 0.271285 | 0.176101 | 0.160336 | 0.084141 | 0.131988 | 0.12122  | 0.406852 | 0.53721  | 0.63484  | 0.037812 | -0.98983 |
| AA08896LCS_IVQSDAIDGDEEGLFK_S4_1  | AA08896LCS | WASH2C2 | 253725  | WASH complex subunit 2C             | S836        |                   | 95.49                                                  | DDPDAVQSTVFQDE               |           |          |          |          |          |           | 0.23593  | 0.192058 | 0.214406 | 0.126403 | 0.188061 | 0.115381 | 0.103942 | 0.142008 | 0.206659 | 0.647207 | 0.007217 | -0.91159 |
| AA08896LCS_IVQSDAIDGDEEGLFK_S4_1  | AA08896LCS | WASH2C2 | 253725  | WASH complex subunit 2C             | S836        |                   | 95.49                                                  | DDPDAVQSTVFQDE               |           |          |          |          |          |           | 0.217785 | 0.236132 | 0.229297 | 0.137891 | 0.140589 | 0.108832 | 0.129104 | 0.227738 | 0.565897 | 0.343251 | 0.01011  | -0.81884 |
| AA08896LCS_IVQSDAIDGDEEGLFK_S4_1  | AA08896LCS | WASH2C2 | 253725  | WASH complex subunit 2C             | S836        |                   | 95.49                                                  | DDPDAVQSTVFQDE               |           |          |          |          |          |           | 0.264813 | 0.275532 | 0.195121 | 0.174234 | 0.083459 | 0.127554 | 0.128415 | 0.245155 | 0.523812 | 0.961108 | 0.032577 | -0.93288 |
| AA08896LCS_IVQSDAIDGDEEGLFK_S4_1  | AA08896LCS | WASH2C2 | 253725  | WASH complex subunit 2C             | S836        |                   | 95.49                                                  | DDPDAVQSTVFQDE               |           |          |          |          |          |           | 0.290178 | 0.261813 | 0.219773 | 0.169352 | 0.131095 | 0.145052 | 0.1485   | 0.257255 | 0.577248 | 0.460003 | 0.009545 | -0.79274 |
| AA08896LCS_IVQSDAIDGDEEGLFK_S4_1  | AA08896LCS | WASH2C2 | 253725  | WASH complex subunit 2C             | S836        |                   | 95.49                                                  | DDPDAVQSTVFQDE               |           |          |          |          |          |           | 0.319514 | 0.243555 | 0.282213 | 0.145227 | 0.161786 | 0.       |          |          |          |          |          |          |



|                                            |         |          |        |                                                            |             |                   |                                |          |          |          |          |          |          |          |          |          |          |          |          |
|--------------------------------------------|---------|----------|--------|------------------------------------------------------------|-------------|-------------------|--------------------------------|----------|----------|----------|----------|----------|----------|----------|----------|----------|----------|----------|----------|
| J8KQR7_01PHSQDTHLHK_S1_1                   | J8KQR7  | CEP170B  | 283638 | centrosomal protein 170B                                   | 5908        | 100               | AARMDFHQDTHLIL                 | 0.196247 | 0.21124  | 0.195609 | 0.158695 | 0.131919 | 0.139071 | 0.143228 | 0.201032 | 0.172465 | 0.576887 | 0.003681 | -0.48911 |
| J8KQR7_01SNLSTPRTR_S1_53_1                 | J8KQR7  | CEP170B  | 283638 | centrosomal protein 170B                                   | 5113.51115  | 49.74,49.74       | PKQALTRNSLSLTPF_QALTRNSLSLTPRT | 0.229577 | 0.197091 | 0.224622 | 0.152669 | 0.10846  | 0.117421 | 0.126183 | 0.170096 | 0.581231 | 0.178616 | 0.005718 | -0.78282 |
| J8KQR7_01KQFHSPSGDPK_S1_1                  | J8KQR7  | CEP170B  | 283638 | centrosomal protein 170B                                   | 5422        | 92.98             | GRKALQKSTHSPSG                 | 0.204402 | 0.244581 | 0.245879 | 0.17323  | 0.123501 | 0.131456 | 0.142729 | 0.214977 | 0.663929 | 0.962872 | 0.027956 | -0.5009  |
| J8KQV8_01SRSHLSPSEASSQPVK_S1_53_1          | J8KQV8  | SYNJ1    | 8867   | synaptotajin 1                                             | 5139.51331  | 47.67,47.67       | PQPPFRSSRHSLPE_QPPFRSSRHSLPE   | 0.236841 | 0.197928 | 0.2488   | 0.158689 | 0.16217  | 0.148858 | 0.156572 | 0.225857 | 0.693238 | 0.133646 | 0.010878 | -0.52858 |
| J8KQV8_01SRSHLSPSEASSQPVK_S1_54_1          | J8KQV8  | SYNJ1    | 8867   | synaptotajin 1                                             | 5133.51332  | 45.8,45.8         | QPPFRSSRHSLPE_QPPFRSSRHSLPE    | 0.236841 | 0.286508 | 0.212514 | 0.165191 | 0.185989 | 0.13127  | 0.160817 | 0.245127 | 0.566505 | 0.704118 | 0.034948 | -0.60811 |
| J8KQV8_01SNLSTPRTR_S1_53_1                 | J8KQV8  | SYNJ1    | 8867   | synaptotajin 1                                             | 5125        | 100               | RQJQRRSGVALLML                 | 0.272025 | 0.20088  | 0.221338 | 0.142291 | 0.08802  | 0.116301 | 0.115537 | 0.231418 | 0.49926  | 0.709121 | 0.016564 | -0.00214 |
| J8K7A1_01XNFAVPVPPSSVGGGR_S19_123_1        | J8K7A1  | F8KL20   | 84961  | F-box and leucine-rich repeat protein 20, isoform CRA_A    | 7419.5423   | 100-100           | HAKLFLVPPVPPSSVGGGR            | 0.155182 | 0.201394 | 0.171905 | 0.134002 | 0.136154 | 0.107176 | 0.125778 | 0.17616  | 0.713994 | 0.645099 | 0.037303 | -0.48602 |
| J8K760_01RRPPLQIVTDLSD_S15_1               | J8K760  | MNNL1    | 752    | formin like 1                                              | 5681        | 100               | LQVTSDEL                       | 0.191649 | 0.266989 | 0.184788 | 0.148425 | 0.131866 | 0.135274 | 0.138521 | 0.12712  | 0.666892 | 0.1245   | 0.027901 | -0.58447 |
| MOQ213_kvqPnTR_S3_1                        | MOQ213  | FCOH1    | 23149  | FCH and mu domain containing endocytic adaptor 1           | 5577        | 99.97             | RLRSKRSVCFLTRSN                | 0.150103 | 0.189877 | 0.172564 | 0.111072 | 0.10672  | 0.115166 | 0.095988 | 0.178084 | 0.561829 | 0.620264 | 0.02234  | -0.8318  |
| MOR0H3_q5HFSGSLGSR_S3_1                    | MOR0H3  | ZFP36    | 7538   | ZFP36 ring finger protein                                  | 5201.5203   | 49.98,49.98       | HPVVLRSYFSGELG_PVLRSYFSGELG    | 0.283859 | 0.339879 | 0.236141 | 0.142407 | 0.088420 | 0.129662 | 0.120157 | 0.285866 | 0.420326 | 0.472462 | 0.007807 | -1.25042 |
| OO0443_v5NLQVqP_S3_1                       | OO0443  | PIK3C2A  | 5286   | phosphatidylinositol-4-ophosphate 3-kinase catalytic subun | 5259        | 100               | KVSNLQVSPSPDEIS                | 0.180942 | 0.20416  | 0.195885 | 0.140622 | 0.06704  | 0.131507 | 0.113056 | 0.193896 | 0.583079 | 0.160313 | 0.028624 | -0.77824 |
| OO0446_n5TEDIM5SL5GDIYNLQTR_S10_711_1      | OO0446  | RAB29    | 8934   | RAB29, member of Ras superfamily                           | 5185.7186   | 50,50             | TDRNLSLTQGGYINL                | 0.206215 | 0.179932 | 0.189407 | 0.14801  | 0.147183 | 0.139114 | 0.149919 | 0.191851 | 0.755685 | 0.254286 | 0.004486 | -0.40414 |
| OL4974_01LSTSDIEEK_S4_75_1                 | OL4974  | PPP1R12A | 4659   | protein phosphatase 1 regulatory subunit 12A               | 5507.57508  | 48.66,48.66       | TIPRRLASTSDIEEK                | 0.233729 | 0.221557 | 0.168233 | 0.104398 | 0.079959 | 0.103668 | 0.104887 | 0.20784  | 0.504652 | 0.699199 | 0.014515 | -0.98664 |
| OL4974_01LSTSDIEEK_S4_76_1                 | OL4974  | PPP1R12A | 4659   | protein phosphatase 1 regulatory subunit 12A               | 5507        | 83.04             | TIPRRLASTSDIEEK                | 0.285813 | 0.179886 | 0.237091 | 0.13111  | 0.103631 | 0.10363  | 0.11269  | 0.234263 | 0.481041 | 0.16602  | 0.019053 | -1.05577 |
| OL4974_01LSTSDIEEK_S4_77_1                 | OL4974  | PPP1R12A | 4659   | protein phosphatase 1 regulatory subunit 12A               | 5509        | 99.49             | TIPRRLASTSDIEEK                | 0.187175 | 0.218121 | 0.136112 | 0.110766 | 0.05016  | 0.092755 | 0.084561 | 0.180469 | 0.468559 | 0.731056 | 0.032694 | -1.0937  |
| OL4980_01RNVPGPNNPHEFEEMK_S3_1             | OL4980  | XPO1     | 7514   | exportin 1                                                 | 51055       | 100               | ERKHKQKRVVPGFNP                | 0.173811 | 0.172713 | 0.150085 | 0.141693 | 0.108656 | 0.101119 | 0.117159 | 0.165536 | 0.707756 | 0.556139 | 0.029554 | -0.49868 |
| OL5014_01PnTDLV_S3_1                       | OL5014  | ZNF609   | 23060  | zinc finger protein 609                                    | 51055       | 92.67             | FLTKAPSLDVLKWS                 | 0.246523 | 0.246578 | 0.230924 | 0.153156 | 0.150056 | 0.194792 | 0.166002 | 0.240741 | 0.689543 | 0.207627 | 0.08011  | -0.53629 |
| OL5042_01NLFHEEEK_S1_1                     | OL5042  | UZSURP   | 23350  | U2 snRNP associated SURP domain containing                 | 5202        | 100               | GEKMKKKNLLEFKE                 | 0.195988 | 0.212214 | 0.234551 | 0.122604 | 0.134704 | 0.105038 | 0.107882 | 0.214251 | 0.563744 | 0.744023 | 0.002695 | -0.82689 |
| OL5164_01SLEDVPSQKsPHVGEZR_S7_1            | OL5164  | TRIM24   | 8805   | tripartite motif containing 24                             | 5808        | 90.3              | KEEKKQKSLMFLV                  | 0.213771 | 0.207219 | 0.212103 | 0.154252 | 0.139848 | 0.176058 | 0.15672  | 0.20141  | 0.732263 | 0.252547 | 0.007037 | -0.44957 |
| OL43149_hQVPELELAWPHTPPHNNK_S21_1          | OL43149 | ZZF1     | 23140  | zinc finger ZZ-type and EF-hand domain containing 1        | 51276       | 90.45             | PTFHPRNKSEKVNIP                | 0.196374 | 0.218801 | 0.157146 | 0.148401 | 0.122461 | 0.11915  | 0.130004 | 0.190774 | 0.681457 | 0.417049 | 0.039917 | -0.55331 |
| OL43491_01qkTVLVAK_S3_1                    | OL43491 | EPB41L2  | 2037   | erythrocyte membrane protein band 4.1 like 2               | 587         | 88.4              | PWLKQKQSYLVLVAK                | 0.236715 | 0.224661 | 0.220368 | 0.140475 | 0.120317 | 0.114976 | 0.125256 | 0.227448 | 0.551185 | 0.568518 | 0.000373 | -0.85939 |
| OL43491_01qkTVLVAK_S3_V4_1                 | OL43491 | EPB41L2  | 2037   | erythrocyte membrane protein band 4.1 like 2               | 587.788     | 49.9,49.9         | PWLKQKQSYLVLVAK                | 0.246455 | 0.24349  | 0.228328 | 0.165793 | 0.119203 | 0.098391 | 0.127796 | 0.239425 | 0.533763 | 0.147068 | 0.005722 | -0.90573 |
| OL43491_01qkTVLVAK_S3_V4_T5_1              | OL43491 | EPB41L2  | 2037   | erythrocyte membrane protein band 4.1 like 2               | 587.788.789 | 33.33,33.33,33.33 | PWLKQKQSYLVLVAK                | 0.246455 | 0.24349  | 0.228328 | 0.165793 | 0.119203 | 0.098391 | 0.127796 | 0.239425 | 0.533763 | 0.147068 | 0.005722 | -0.90573 |
| OL43491_01qkTVLVAK_S3_V4_T5_T1_1           | OL43491 | EPB41L2  | 2037   | erythrocyte membrane protein band 4.1 like 2               | 587         | 92.44             | PWLKQKQSYLVLVAK                | 0.229463 | 0.256626 | 0.203375 | 0.136296 | 0.156808 | 0.147044 | 0.146716 | 0.230488 | 0.636544 | 0.276022 | 0.006281 | -0.65167 |
| OL43516_01LDDPMPPPPVPNPGR_S18_1            | OL43516 | WIPI1    | 7456   | WAS/WASL interacting protein family member 1               | 5276        | 100               | PPVQNRPIHREAVP                 | 0.220387 | 0.255492 | 0.246427 | 0.155307 | 0.128606 | 0.184238 | 0.15605  | 0.207808 | 0.648134 | 0.600393 | 0.011585 | -0.62564 |
| OL43516_01LSSSTPSPR_S3_1                   | OL43516 | WIPI1    | 7456   | WAS/WASL interacting protein family member 1               | 5340        | 99.45             | RLPQNLKQSLSTPTP                | 0.246575 | 0.240137 | 0.24572  | 0.153284 | 0.149983 | 0.167685 | 0.156984 | 0.262544 | 0.625774 | 0.701577 | 0.00053  | -0.67214 |
| OL43566_01LQVLEELQGLPVEGQGRPR_S1_1         | OL43566 | RGS14    | 10636  | regulator of G-protein signaling 14                        | 5218        | 100               | ATLTKQKQSHMAHF                 | 0.1838   | 0.219378 | 0.242482 | 0.143652 | 0.152747 | 0.159936 | 0.152111 | 0.21522  | 0.706773 | 0.141629 | 0.032495 | -0.50068 |
| OL43572_01QPHEEAHFGDGLR_S4_1               | OL43572 | AKAP10   | 11216  | A-kinase anchoring protein 10                              | 5296        | 100               | ATLTKQKQSHMAHF                 | 0.29484  | 0.265682 | 0.197986 | 0.166    | 0.178962 | 0.129344 | 0.108422 | 0.292504 | 0.690193 | 0.739237 | 0.04554  | -0.53493 |
| OL60293_01r2SDLSEK_S3_1                    | OL60293 | ZFCH1    | 196441 | zinc finger CCH1-type containing                           | 5352        | 94.48             | QNLTRIRTSDDISEL                | 0.198088 | 0.24033  | 0.229368 | 0.150309 | 0.122832 | 0.175498 | 0.149544 | 0.22596  | 0.671829 | 0.818312 | 0.020979 | -0.57383 |
| OL60307_01RWSVSSGSS-QSSSSOPEP_S3_1         | OL60307 | MST31    | 23001  | microtubule associated serine/threonine kinase 3           | 5754        | 99.99             | SADILRLSWSSGSS                 | 0.225708 | 0.175645 | 0.184739 | 0.095267 | 0.147727 | 0.142478 | 0.128419 | 0.195364 | 0.657699 | 0.920108 | 0.042144 | -6.045   |
| OL60493_01RQDFEWLR_S4_1                    | OL60493 | SNX3     | 8724   | sorting nexin 3                                            | 572         | 99.75             | STVYRYSDFEFLRS                 | 0.230664 | 0.22501  | 0.201001 | 0.142477 | 0.145121 | 0.148739 | 0.145446 | 0.14891  | 0.664465 | 0.076622 | 0.001375 | -0.58974 |
| OL75044_01NGDGLPHVQVQDTEGTVRSPPK_S26_527_1 | OL75044 | SRGAP2   | 23380  | SLIT-ROBO Rho GTPase activating protein 2                  | 5795.5796   | 50,50             | EDGVVRSPPKSHQV                 | 0.183115 | 0.227238 | 0.206446 | 0.147166 | 0.123834 | 0.152822 | 0.141274 | 0.209649 | 0.673859 | 0.592436 | 0.013754 | -0.56948 |
| OL75044_01FNHHRMPDVEPQIAQETMNSALNEER_S1_1  | OL75044 | SRGAP2   | 23380  | SLIT-ROBO Rho GTPase activating protein 2                  | 5930        | 100               | ATAGKSSPNNHRR                  | 0.183115 | 0.236266 | 0.206155 | 0.130061 | 0.124038 | 0.141043 | 0.131714 | 0.208512 | 0.631684 | 0.189473 | 0.008982 | -0.66272 |
| OL75113_01nKAGVSPVELTR_T5_1                | OL75113 | N4BP1    | 9683   | NEDD4 binding protein 1                                    | 7242        | 98.65             | EARNKAGTVPVELTR                | 0.217445 | 0.196353 | 0.234766 | 0.146485 | 0.139933 | 0.157893 | 0.141033 | 0.216183 | 0.685205 | 0.368081 | 0.005208 | -0.54539 |
| OL75151_01eKAPITMDDLEAHTT_S4_1             | OL75151 | PHF2     | 5253   | PHD finger protein 2                                       | 5539        | 91.68             | KKRSEASPTIPNLD                 | 0.210389 | 0.234781 | 0.237593 | 0.132059 | 0.123341 | 0.16097  | 0.13879  | 0.227588 | 0.696829 | 0.731705 | 0.003405 | -0.71352 |
| OL75152_01SASPHAGV-specific ribonuclease   | OL75152 | PHF2     | 5253   | PHD finger protein 2                                       | 5809        | 99.99             | RRKKRGGDDAFSTP                 | 0.26226  | 0.284009 | 0.230322 | 0.152416 | 0.140448 | 0.134555 | 0.155806 | 0.258663 | 0.602352 | 0.586667 | 0.007782 | -0.71332 |
| OL75152_01SASPHAGV-specific ribonuclease   | OL75152 | ZCH31A   | 9877   | zinc finger CCH2-type containing 11A                       | 5290        | 99.72             | RLKRFKSGAGSDP                  | 0.239672 | 0.265291 | 0.251099 | 0.125795 | 0.184786 | 0.135773 | 0.147418 | 0.265354 | 0.658434 | 0.495486 | 0.038332 | -0.60289 |
| OL75152_01SASPHAGV-specific ribonuclease   | OL75152 | ZCH31A   | 9877   | zinc finger CCH2-type containing 11A                       | 5759        | 86.02             | MKTRLSASTQKP                   | 0.225745 | 0.274219 | 0.216033 | 0.158284 | 0.1476   | 0.172274 | 0.159386 | 0.266686 | 0.66782  | 0.727269 | 0.01492  | -0.58247 |
| OL75152_01SASPHAGV-specific ribonuclease   | OL75152 | ZCH31A   | 9877   | zinc finger CCH2-type containing 11A                       | 5758        | 84.48             | SMKTRLSASTQKP                  | 0.17462  | 0.246065 | 0.200887 | 0.12068  | 0.096145 | 0.158059 | 0.125028 | 0.207194 | 0.603436 | 0.853061 | 0.040644 | -0.72873 |
| OL75179_01pAPPSVPLGSEKPSNVQDR_S3_1         | OL75179 | ANKRD17  | 26057  | ankyrin repeat domain 17                                   | 52401       | 97.71             | SSGVPRAPSPAPSV                 | 0.211497 | 0.225494 | 0.26106  | 0.140962 | 0.164772 | 0.179726 | 0.16182  | 0.236864 | 0.695448 | 0.738471 | 0.018858 | -0.52398 |
| OL75376_01HEAPSISGQPGCDQNASPSK_S6_1        | OL75376 | NCOR1    | 9611   | nuclear receptor corepressor 1                             | 5158        | 92.78             | KHEAPSSISGQPGC                 | 0.197553 | 0.256619 | 0.281106 | 0.139093 | 0.174566 | 0.180598 | 0.164752 | 0.245239 | 0.671802 | 0.432223 | 0.045655 | -0.57389 |
| OL75376_01PALLEFHGSDRRPQR_S3_1             | OL75376 | NCOR1    | 9611   | nuclear receptor corepressor 1                             | 570         | 100               | QQLRLRPSLLSEFHP                | 0.239973 | 0.197551 | 0.230599 | 0.130875 | 0.194295 | 0.140361 | 0.157221 | 0.220641 | 0.703302 | 0.573821 | 0.048859 | -0.50778 |
| OL75376_01PALLEFHGSDRRPQR_S3_1             | OL75376 | NCOR1    | 9611   | nuclear receptor corepressor 1                             | 5997.5999   | 66.52,66.52       | STSPCKTSSKNPREK                | 0.246249 | 0.27595  | 0.278388 | 0.132308 | 0.135088 | 0.150899 | 0.139425 | 0.266862 | 0.524549 | 0.490439 | 0.000423 | -0.93661 |
| OL75420_01SLVPSGSR_S3_1                    | OL75420 | LRCH4    | 64599  | LRCH4 interacting GVF protein 1                            |             |                   |                                |          |          |          |          |          |          |          |          |          |          |          |          |

|                                                   |        |          |      |                                                     |                |                          |                                                     |                                                          |          |          |          |          |          |          |          |          |          |          |          |          |
|---------------------------------------------------|--------|----------|------|-----------------------------------------------------|----------------|--------------------------|-----------------------------------------------------|----------------------------------------------------------|----------|----------|----------|----------|----------|----------|----------|----------|----------|----------|----------|----------|
| P23284_IDSRDPLKDVIIADLGGK_S3_1                    | P23284 | PPIB     | 5479 | peptidylprolyl isomerase B                          | S189           | 89.25                    | VEBTRDSDRDKPLKD                                     | 0.140664                                                 | 0.160231 | 0.19266  | 0.063756 | 0.103032 | 0.110587 | 0.092458 | 0.164518 | 0.561995 | 0.956473 | 0.026464 | -0.83137 |          |
| P23470_rNRNSVVPSE_S4_1                            | P23470 | PTPRG    | 5793 | protein tyrosine phosphatase receptor type G        | S1182          | 99.76                    | NKRNKRNSVVPSE                                       | 0.134854                                                 | 0.15283  | 0.132743 | 0.105922 | 0.081949 | 0.120706 | 0.102859 | 0.140142 | 0.73396  | 0.483133 | 0.05226  | -0.4623  |          |
| P25098_nkPRpRVVLELX_S5_1                          | P25098 | GRK2     | 156  | G protein-coupled receptor kinase 2                 | S670           | 100                      | KMKNRPSPVLELX                                       | 0.172106                                                 | 0.157892 | 0.154329 | 0.111359 | 0.126421 | 0.125162 | 0.109811 | 0.16442  | 0.749375 | 0.882281 | 0.005089 | -0.41624 |          |
| P26639_nkEGGDGGRAELNMPWEYVYTR_S5_1                | P26639 | TAR51    | 6987 | atypical-rRNA synthetase 1                          | S39            | 100                      | KKNKHEGSDGGRAE                                      | 0.206347                                                 | 0.189188 | 0.147448 | 0.133822 | 0.120355 | 0.116515 | 0.123564 | 0.180094 | 0.686105 | 0.115126 | 0.0415   | -0.6635  |          |
| P29374_rTSLNMPVPLGSK_S1_S4_S5_1                   | P29374 | ARID4A   | 589  | thrombolytic domain 4A                              | S673,5676,5677 | 32.37,52,57,32,57        | RGKFFPLSTSLVSNMP_PPLKSTLSTSNMPYLFL_PLKSTLSTSNMPYLFL | 0.268452                                                 | 0.211292 | 0.237407 | 0.149614 | 0.146672 | 0.154838 | 0.150375 | 0.23902  | 0.625129 | 0.048064 | 0.030881 | -0.5487  |          |
| P29590_IARSPFQCRPPKST_S4_S12_2                    | P29590 | PM       | 371  | Protein PM                                          | S504           | 56.83,76,93              | KEARLARSPPQPPR_SFEQPPFSTSKAVSP                      | 0.159826                                                 | 0.117931 | 0.136282 | 0.089665 | 0.05927  | 0.077136 | 0.075407 | 0.138477 | 0.545446 | 0.709437 | 0.03189  | -0.87588 |          |
| P30523_VYSHQGYTEAEFEPR_Y7_S8_1                    | P30523 | LRPAP1   | 6443 | LDL receptor related protein associated protein 1   | S312           | 99.1                     | ASLKRSPSTAEFE                                       | 0.182193                                                 | 0.200491 | 0.186719 | 0.119985 | 0.119845 | 0.14391  | 0.127913 | 0.189779 | 0.673946 | 0.641908 | 0.003105 | -0.5692  |          |
| P30622_sPAKSLSSVSSVAVSRPSPR_S3_1                  | P30622 | KLMP1    | 4209 | CAP-Gly domain containing linker protein 1          | S312           | 99.1                     | ASLKRSPSTAEFE                                       | 0.238908                                                 | 0.200491 | 0.186719 | 0.119985 | 0.119845 | 0.14391  | 0.127913 | 0.189779 | 0.558944 | 0.462197 | 0.01619  | -0.8399  |          |
| P31749_rHFPQFYSASGTA_S8_Y9_S10_1                  | P31749 | AKT1     | 207  | AKT serine/threonine kinase 1                       | S473,5474,5475 | 33.33,33,33,33,33        | RHFQPFQYSASGTA_HFPQFQYSASGTA_HFPQFQYSASGTA          | 0.199261                                                 | 0.176136 | 0.242681 | 0.149412 | 0.117822 | 0.153002 | 0.140079 | 0.206026 | 0.679909 | 0.494353 | 0.042664 | -0.55659 |          |
| P33241_QASIELPMSNAVASTK_S8_1                      | P33241 | LSP1     | 4046 | lymphocyte specific protein 1                       | S257           | 89.99                    | QASIELPMSNAVASTK                                    | 0.20342                                                  | 0.148476 | 0.184325 | 0.138327 | 0.09459  | 0.118367 | 0.116629 | 0.208074 | 0.578813 | 0.664859 | 0.005418 | -0.78883 |          |
| P33241_rPSPVLEGTIEQSPSPSTL_S15_1                  | P33241 | LSP1     | 4046 | lymphocyte specific protein 1                       | S189           | 85.42                    | EGTIEQSPSPSTL                                       | 0.214841                                                 | 0.184061 | 0.196309 | 0.14498  | 0.117927 | 0.127478 | 0.145621 | 0.198404 | 0.732152 | 0.482624 | 0.043335 | -0.44979 |          |
| P34910_rTShLTPWPKPS_S3_S6_2                       | P34910 | E12B     | 2124 | ectopic viral integration site 2B                   | S268,S271      | 93.03,99.94              | E12KTRTSIISLTPW_TKRTSIISLTPWPKPS                    | 0.325091                                                 | 0.304669 | 0.243455 | 0.208216 | 0.170269 | 0.168488 | 0.168813 | 0.296072 | 0.579042 | 0.966917 | 0.02773  | -0.78826 |          |
| P34910_rTShLTPWPKPS_T2_S3_1                       | P34910 | E12B     | 2124 | ectopic viral integration site 2B                   | T267,S268      | 99.27,92.19              | NE12KTRTSIISLTPW_E12KTRTSIISLTPW                    | 0.282274                                                 | 0.267728 | 0.203222 | 0.185049 | 0.153432 | 0.107841 | 0.148774 | 0.215075 | 0.59255  | 0.919506 | 0.036835 | -0.75499 |          |
| P35367_rAGGGVSLKSPQTK_S10_1                       | P35367 | HRH1     | 3269 | histamine receptor H1                               | S275           | 100                      | GGGVSLKSPQTKPE                                      | 0.250175                                                 | 0.316789 | 0.293073 | 0.146385 | 0.15104  | 0.115978 | 0.137804 | 0.286679 | 0.480692 | 0.482406 | 0.02651  | -1.05682 |          |
| P35611_rAVVTPPTTAPAHK_T5_1                        | P35611 | ADD1     | 118  | adducin 1                                           | T11            | 99.59                    | DSRAAVVTPPTTAP                                      | 0.219739                                                 | 0.205474 | 0.240672 | 0.133105 | 0.116497 | 0.195537 | 0.14838  | 0.221962 | 0.668491 | 0.305748 | 0.048086 | -0.58102 |          |
| P35611_rAVVTPPTTAPAHKR_T5_S6_1                    | P35611 | ADD1     | 118  | adducin 1                                           | T11,S12        | 49.76,49.76              | DSRAAVVTPPTTAP_SRAAVVTPPTTAP                        | 0.217818                                                 | 0.202167 | 0.20581  | 0.134087 | 0.092382 | 0.148305 | 0.124957 | 0.235092 | 0.531387 | 0.674135 | 0.08917  | -0.91217 |          |
| P35611_rHFLK_S3_1                                 | P35611 | ADD1     | 118  | adducin 1                                           | S726           | 99.76                    | KKFFKSTFLKSKK                                       | 0.19775                                                  | 0.220019 | 0.116321 | 0.143832 | 0.102341 | 0.128698 | 0.124957 | 0.212621 | 0.590476 | 0.905932 | 0.03485  | -0.76005 |          |
| P36507_rKPVLPALINPTIAGSPSEGAELNVDLQK_S19_P36507   | P36507 | MAP2K2   | 5605 | mitogen-activated protein kinase kinase 2           | S23            | 100                      | FTIAGSPSEGAEL                                       | 0.127896                                                 | 0.200799 | 0.199304 | 0.133873 | 0.113144 | 0.115759 | 0.120925 | 0.210367 | 0.593538 | 0.206394 | 0.015079 | -0.75259 |          |
| P36507_rKPVLPALINPTIAGSPSEGAELNVDLQK_S19_P36507   | P36507 | MAP2K2   | 5605 | mitogen-activated protein kinase kinase 2           | S23,725        | 40.78,40.78              | FTIAGSPSEGAEL_IAGSPSEGAEL                           | 0.224898                                                 | 0.253023 | 0.179258 | 0.134524 | 0.117366 | 0.09497  | 0.11562  | 0.21906  | 0.5278   | 0.442227 | 0.01385  | -0.92194 |          |
| P36915_rLQQQPSGLGPR_S7_1                          | P36915 | GNL1     | 2794 | G protein nuclear 1                                 | S34            | 99.76                    | RLQQPSGLGPR                                         | 0.247623                                                 | 0.270204 | 0.210143 | 0.16987  | 0.114186 | 0.141311 | 0.141789 | 0.221597 | 0.639851 | 0.793994 | 0.018226 | -0.64419 |          |
| P36915_rLQQQPSGLGPR_S7_1                          | P36915 | GNL1     | 2794 | G protein nuclear 1                                 | S68            | 100                      | RLQQPSGLGPR                                         | 0.224898                                                 | 0.253023 | 0.179258 | 0.134524 | 0.117366 | 0.09497  | 0.11562  | 0.21906  | 0.5278   | 0.442227 | 0.01385  | -0.92194 |          |
| P37802_rASQAQGMtGYmPr_S3_1                        | P37802 | TAGLN2   | 8407 | transgelin 2                                        | S185           | 94.95                    | MGTNQASQAQGM                                        | 0.295606                                                 | 0.217412 | 0.252337 | 0.143969 | 0.092711 | 0.120786 | 0.119155 | 0.255118 | 0.467058 | 0.600792 | 0.007341 | -1.09833 |          |
| P38398_rSPFHHTLAAGDQK_S3_T6_1                     | P38398 | BRC1A    | 672  | BRC1A associated ATM activator 1                    | S1191,T1194    | 44.96,44.96              | GELSSPFFHTLTHLAAGDQK                                | 0.313217                                                 | 0.274203 | 0.320961 | 0.214063 | 0.209797 | 0.223055 | 0.215638 | 0.307293 | 0.712163 | 0.135951 | 0.004453 | -0.89973 |          |
| P39687_rRTPDVKVLVDNR_S5_1                         | P39687 | ANP32A   | 8125 | acidic nuclear phosphoprotein 32 family member A    | T15            | 98.71                    | ELRNRTPDVKVLEL                                      | 0.169224                                                 | 0.148829 | 0.180978 | 0.131292 | 0.112783 | 0.103932 | 0.117822 | 0.166341 | 0.708306 | 0.688612 | 0.013879 | -0.40974 |          |
| P39687_rRTPDVKVLVDNR_S5_1                         | P39687 | ANP32A   | 8125 | acidic nuclear phosphoprotein 32 family member A    | S15,S17        | 50.50                    | HELNRTPDVKVLEL                                      | 0.142178                                                 | 0.150652 | 0.152673 | 0.131009 | 0.11567  | 0.093401 | 0.11336  | 0.103401 | 0.75422  | 0.255362 | 0.039477 | -0.49755 |          |
| P42166_rASFSFQNFQPSSELSRFAK_S2_1                  | P42166 | TMPO     | 7112 | thymopoietin                                        | S442           | 91.24                    | ERVDFQNFQPSSELSRFAK                                 | 0.218746                                                 | 0.209971 | 0.314791 | 0.100316 | 0.131129 | 0.166157 | 0.139867 | 0.147836 | 0.564355 | 0.283905 | 0.040781 | -0.82333 |          |
| P42166_rASFSFQNFQPSSELSRFAK_S2_1                  | P42166 | TMPO     | 7112 | thymopoietin                                        | S279           | 99.99                    | SEANLFLKSSSELSRFAK                                  | 0.223958                                                 | 0.137549 | 0.188309 | 0.125664 | 0.088259 | 0.10827  | 0.100731 | 0.24327  | 0.414068 | 0.235614 | 0.027376 | -1.27026 |          |
| P42166_rASFSFQNFQPSSELSRFAK_S2_1                  | P42166 | TMPO     | 7112 | thymopoietin                                        | S272           | 100                      | QLQLASERNLFTIS                                      | 0.244841                                                 | 0.318318 | 0.187928 | 0.122936 | 0.07755  | 0.104294 | 0.101594 | 0.250362 | 0.405786 | 0.217141 | 0.02045  | -1.30121 |          |
| P42166_rRPLPAGINSK_T9_1                           | P42166 | TMPO     | 7112 | thymopoietin                                        | T57            | 98.95                    | RPLPAGINSKGPDD                                      | 0.211353                                                 | 0.18366  | 0.243521 | 0.122805 | 0.10124  | 0.089952 | 0.107665 | 0.12845  | 0.50584  | 0.323543 | 0.005099 | -0.98325 |          |
| P42166_rRPLPAGINSK_T9_1                           | P42166 | TMPO     | 7112 | thymopoietin                                        | T160           | 97.98                    | GTESSSPLPTISS                                       | 0.22834                                                  | 0.226745 | 0.237675 | 0.147294 | 0.150584 | 0.202136 | 0.166672 | 0.23092  | 0.721771 | 0.071077 | 0.02373  | -0.47039 |          |
| P42166_rRPLPAGINSK_T9_1                           | P42166 | TMPO     | 7112 | thymopoietin                                        | T57            | 98.95                    | RPLPAGINSKGPDD                                      | 0.246044                                                 | 0.176372 | 0.244071 | 0.122412 | 0.116685 | 0.091546 | 0.110214 | 0.221262 | 0.496099 | 0.292533 | 0.01687  | -1.0113  |          |
| P42167_rVEHNQSYQAQITETWSSGSK_Y8_S9_1              | P42167 | TMPO     | 7112 | thymopoietin                                        | S222,Y222,S224 | 33.17,33.17,33.17        | RRVHNQSYQAQITETWSSGSK                               | 0.275193                                                 | 0.186727 | 0.232615 | 0.168775 | 0.140499 | 0.10069  | 0.106625 | 0.231256 | 0.902035 | 0.748631 | 0.042422 | -0.76064 |          |
| P42167_rRPLPAGINSK_T9_1                           | P42167 | TMPO     | 7112 | thymopoietin                                        | T160           | 97.98                    | GTESSSPLPTISS                                       | 0.265819                                                 | 0.127447 | 0.238213 | 0.146824 | 0.173558 | 0.187008 | 0.16913  | 0.240593 | 0.702971 | 0.836494 | 0.017343 | -0.50846 |          |
| P42226_rGKGYVPATIK_Y5_1                           | P42226 | STAT6    | 6778 | signal transducer and activator of transcription 6  | Y641           | 100                      | MGKDRGYVPATIKM                                      | 0.261756                                                 | 0.166869 | 0.163368 | 0.057452 | 0.041371 | 0.058485 | 0.051223 | 0.197331 | 0.259577 | 0.04669  | 0.042522 | -1.94576 |          |
| P42226_rGKGYVPATIK_Y5_1                           | P42226 | STAT6    | 6778 | signal transducer and activator of transcription 6  | Y641           | 100                      | MGKDRGYVPATIKM                                      | 0.244566                                                 | 0.243643 | 0.243122 | 0.085726 | 0.099953 | 0.107885 | 0.078955 | 0.243777 | 0.360391 | 0.00294  | 0.040891 | -1.47236 |          |
| P42226_rGKGYVPATIK_Y5_1                           | P42226 | STAT6    | 6778 | signal transducer and activator of transcription 6  | S178           | 99.78                    | REANCSPPGAGLVD                                      | 0.171645                                                 | 0.192429 | 0.205568 | 0.128964 | 0.109667 | 0.141289 | 0.141289 | 0.210927 | 0.641249 | 0.703189 | 0.02129  | -0.70319 |          |
| P42229_rYMSDLSRPLPAGLFTSAR_S11_1                  | P42229 | STAT5A   | 6776 | signal transducer and activator of transcription 5A | S780           | 98.14                    | YMSDLSRPLPAGLFTSAR                                  | 0.222191                                                 | 0.18049  | 0.193425 | 0.126852 | 0.07766  | 0.137617 | 0.114043 | 0.187309 | 0.608851 | 0.98222  | 0.048579 | -0.71584 |          |
| P42231_rYMSDLSRPLPAGLFTSAR_S11_T18_S19_S24_P2229  | P42231 | STAT5A   | 6776 | signal transducer and activator of transcription 5A | S780           | 77.87,57.88              | 99.27,25,25,25,25,01,25,01                          | DLSDLSRPLPAGLFT_SPPAGLFTSARGLSLS_SPPAGLFTSARGLSLS_LFTSAR | 0.182923 | 0.163328 | 0.149303 | 0.124556 | 0.141384 | 0.108091 | 0.124677 | 0.161584 | 0.52474  | 0.985718 | 0.041604 | -0.40588 |
| P42329_rKSDLPAPPAK_S7_1                           | P42329 | ARHGAP21 | 9938 | Rho GTPase activating protein 25                    | S362           | 100                      | KSKDPLPSPAPPAK                                      | 0.167888                                                 | 0.176625 | 0.168078 | 0.102394 | 0.083572 | 0.135807 | 0.107258 | 0.17127  | 0.674878 | 0.685348 | 0.014894 | -0.67466 |          |
| P42345_rDSYAGSVEILDVGLVGEPAHKH_T3_1               | P42345 | MTOR     | 2475 | mechanistic target of rapamycin                     | S2448          | 86.27                    | RSRTRDYSAGGSV                                       | 0.187601                                                 | 0.191655 | 0.198014 | 0.148282 | 0.12314  | 0.135661 | 0.135955 | 0.192424 | 0.704667 | 0.296852 | 0.001947 | -0.50499 |          |
| P42345_rDSYAGSVEILDVGLVGEPAHKH_T3_1               | P42345 | MTOR     | 2475 | mechanistic target of rapamycin                     | T2444          | 74.07                    | KGKRSRTRDYSAGGSV                                    | 0.167853                                                 | 0.17668  | 0.17712  | 0.144565 | 0.110152 | 0.125458 | 0.126425 | 0.158883 | 0.714735 | 0.000329 | 0.03693  | -0.48452 |          |
| P42345_rDSYAGSVEILDVGLVGEPAHKH_T3_1               | P42345 | MTOR     | 2475 | mechanistic target of rapamycin                     | T2444,S2448    | 48.28,48.28              | KGKRSRTRDYSAGGSV                                    | 0.213215                                                 | 0.203563 | 0.217617 | 0.18176  | 0.150628 | 0.11533  | 0.150506 | 0.211465 | 0.711731 | 0.101117 | 0.003025 | -0.40623 |          |
| P42345_rDSYAGSVEILDVGLVGEPAHKH_T3_S5_1            | P42345 | MTOR     | 2475 | mechanistic target of rapamycin                     | T2444,T2446    | 53.33,33,33,33,33,32,32  | KGKRSRTRDYSAGGSV_NKRSRTRDYSAGGSV_RSRTRDYSAGGSV      | 0.237996                                                 | 0.182688 | 0.227076 | 0.160424 | 0.12466  | 0.115237 | 0.13344  | 0.171213 | 0.612918 | 0.191123 | 0.014458 | -0.79026 |          |
| P42345_rDSYAGSVEILDVGLVGEPAHKH_T3_S5_Y6_S7_P24345 | P42345 | MTOR     | 2475 | mechanistic target of rapamycin                     | S2446,S2448    | Y23,33,33,33,23,33,23,33 | NKRSRTRDYSAGGSV                                     | 0.174028                                                 | 0.164502 | 0.176416 | 0.131902 | 0.133038 | 0.101046 | 0.125029 | 0.171649 | 0.7284   | 0.38543  | 0.004917 | -0.47572 |          |
| P42356_rKTSVSSVQSPER_S4_1                         | P42356 | PKA      | 5247 | phosphatidylinositol 4-kinase alpha                 | S287           | 87.83                    | TKRSTVSSVQSPER                                      | 0.176441                                                 | 0.184914 | 0.159547 | 0.113387 | 0.109133 | 0.107925 | 0.110181 | 0.173634 | 0.586396 | 0.842061 | 0.001845 | -0.75002 |          |
| P42926_rASNRKQYVEMAPEVNR_T7_1                     | P42926 | NKAP3    | 2310 | SMC condensin II complex subunit D3                 | S234,S5517     | 49.98,49.98              | AFYQQRSTVEMAPEVNR                                   | 0.167388                                                 | 0.199924 | 0.198904 | 0.100656 | 0.089656 | 0.105474 | 0.147999 | 0.123292 | 0.700299 | 0.338397 | 0.035491 | -0.51196 |          |
| P46821_rLGDVPTDQNVLSQGSFRETID_S6_1                | P46821 | MAP1B    | 4311 | microtubule associated protein 1B                   | S1501          | 99.99                    | ERLGDVPTDQNVLSQGSFRETID                             | 0.16786                                                  | 0.226216 | 0.175112 | 0.142569 | 0.11195  | 0.124307 | 0.126275 | 0.189729 | 0.665556 | 0.380006 | 0.035873 | -0.58737 |          |
| P46832_rKXSVSESGANMNLVAIR_S3_1                    | P46832 | REX5     | 5993 |                                                     |                |                          |                                                     |                                                          |          |          |          |          |          |          |          |          |          |          |          |          |

|                                                |         |        |                                                                 |                |                   |                                 |          |          |          |          |          |          |          |          |          |          |          |          |          |
|------------------------------------------------|---------|--------|-----------------------------------------------------------------|----------------|-------------------|---------------------------------|----------|----------|----------|----------|----------|----------|----------|----------|----------|----------|----------|----------|----------|
| Q09472_030VPPSPRPQSQPHHSPPSR_S1_1              | Q09472  | EP300  | 2033 E1A binding protein p300                                   | 52325          | 88.35             | PQSQPHHSPPSRM                   | 0.227157 | 0.29125  | 0.236601 | 0.152682 | 0.13684  | 0.189581 | 0.159701 | 0.242294 | 0.712014 | 0.420373 | 0.021313 | -0.49002 |          |
| Q09472_IGSINEIPRRFPVNTSPPAALPAR_S12_S20_2      | Q09472R | FCH02  | 115548 FCH and mu domain containing endocytic adaptor 2         | 5488.5496      | 100.97.28         | NEIPIRFPSPVNTSNT.PPVTSNTSPPAAL  | 0.185229 | 0.175848 | 0.193138 | 0.121554 | 0.134371 | 0.122265 | 0.126063 | 0.184738 | 0.682389 | 0.818448 | 0.000835 | -0.55133 |          |
| Q09472_IGSINEIPRRFPVNTSPPAALPAR_S12_T16_2      | Q09472R | FCH02  | 115548 FCH and mu domain containing endocytic adaptor 2         | 5488.1492      | 100.81.1          | NEIPIRFPSPVNTSNT.RFSPVNTSNTSPP  | 0.186004 | 0.157249 | 0.155976 | 0.103919 | 0.132558 | 0.107207 | 0.114802 | 0.155852 | 0.376612 | 0.063747 | 0.010771 | -0.44102 |          |
| Q09472_IGSINEIPRRFPVNTSPPAALPAR_S12_T16_S1_1   | Q09472R | FCH02  | 115548 FCH and mu domain containing endocytic adaptor 2         | 5488.1492.5493 | 100.46.8.46.8     | NEIPIRFPSPVNTSNT.RFSPVNTSNTSPPA | 0.156318 | 0.155648 | 0.171229 | 0.105915 | 0.134453 | 0.10386  | 0.114743 | 0.161065 | 0.172399 | 0.419396 | 0.01402  | -0.68924 |          |
| Q09472_IGSINEIPRRFPVNTSPPAALPAR_S12_S21_1      | Q09472R | FCH02  | 115548 FCH and mu domain containing endocytic adaptor 2         | 5488.1492.5496 | 49.98.49.98.99.92 | NEIPIRFPSPVNTSNT.RFSPVNTSNTSPPA | 0.171462 | 0.130575 | 0.16484  | 0.117049 | 0.138163 | 0.075348 | 0.10352  | 0.157026 | 0.620557 | 0.001572 | 0.029886 | -0.40275 |          |
| Q09472_IGSINEIPRRFPVNTSPPAALPAR_S12_T19_S21_1  | Q09472R | FCH02  | 115548 FCH and mu domain containing endocytic adaptor 2         | 5488.1492.5496 | 92.5.48.17.48.17  | NEIPIRFPSPVNTSNT.RFSPVNTSNTSPPA | 0.179958 | 0.159969 | 0.18082  | 0.123376 | 0.136923 | 0.093257 | 0.117519 | 0.183531 | 0.640321 | 0.291953 | 0.00956  | -0.64133 |          |
| Q09472_IGSINEIPRRFPVNTSPPAALPAR_S12_S21_S21_1  | Q09472R | FCH02  | 115548 FCH and mu domain containing endocytic adaptor 2         | 5488.1492.5496 | 49.95.49.95.98.65 | NEIPIRFPSPVNTSNT.RFSPVNTSNTSPPA | 0.118479 | 0.142054 | 0.148552 | 0.097783 | 0.107064 | 0.085263 | 0.096703 | 0.130362 | 0.718005 | 0.673131 | 0.03963  | -0.43089 |          |
| Q09472_IGSINEIPRRFPVNTSPPAALPAR_S12_S20_2      | Q09472R | FCH02  | 115548 FCH and mu domain containing endocytic adaptor 2         | 5488.1492.5496 | 88.54.99.83       | NEIPIRFPSPVNTSNT.RFSPVNTSNTSPPA | 0.152323 | 0.145776 | 0.162024 | 0.102829 | 0.117121 | 0.094925 | 0.104558 | 0.153474 | 0.684326 | 0.091093 | 0.03812  | -0.54724 |          |
| Q12789_DSJLDTSSVEPNVSVSHADNSGDIAVIEVR_S23      | Q12789  | GF3C1  | 2975 general transcription factor IIIC subunit 1                | 5573           | 81.61             | FVSHCADNSGDIAV                  | 0.185918 | 0.175121 | 0.187265 | 0.10838  | 0.154007 | 0.107339 | 0.123272 | 0.182768 | 0.674472 | 0.117046 | 0.020036 | -0.56817 |          |
| Q12789_GNLRNINIGEAR_S3_1                       | Q12789  | GF3C1  | 2975 general transcription factor IIIC subunit 1                | 51173          | 100               | PLSARGNLRNINIGEAR               | 0.20537  | 0.241067 | 0.158369 | 0.118287 | 0.096015 | 0.101687 | 0.096015 | 0.101687 | 0.201602 | 0.543938 | 0.220854 | 0.017028 | -0.98737 |
| Q12802_RPRAVLVDVETATTFIFANRR_S5_1              | Q12802  | AKAP13 | 11214 A-kinase anchoring protein 13                             | 18176          | 100               | QPKRPRRSLVLDVE                  | 0.210401 | 0.192801 | 0.156084 | 0.130645 | 0.108412 | 0.10568  | 0.114912 | 0.186429 | 0.616386 | 0.392439 | 0.016034 | -0.69809 |          |
| Q12802_ILSHGTDLSNK_S3_1                        | Q12802  | AKAP13 | 11214 A-kinase anchoring protein 13                             | 19127          | 92.46             | INTWFKILSHGTDLSNK               | 0.186146 | 0.243827 | 0.182945 | 0.143497 | 0.100787 | 0.156253 | 0.130474 | 0.204630 | 0.638645 | 0.798758 | 0.04446  | -0.64691 |          |
| Q12802_SAVLLVDVETATTFIFANRR_S1_1               | Q12802  | AKAP13 | 11214 A-kinase anchoring protein 13                             | 18176          | 100               | QPKRPRRSLVLDVE                  | 0.196996 | 0.212544 | 0.237839 | 0.13039  | 0.100702 | 0.094849 | 0.108647 | 0.215793 | 0.503478 | 0.921572 | 0.002714 | -0.9     |          |
| Q12802_SAVLLVDVETATTFIFANRR_S1_1               | Q12802  | AKAP13 | 11214 A-kinase anchoring protein 13                             | 18176          | 100               | QPKRPRRSLVLDVE                  | 0.2895   | 0.216898 | 0.273122 | 0.121658 | 0.089102 | 0.128193 | 0.112985 | 0.25984  | 0.434823 | 0.464345 | 0.004251 | -1.2015  |          |
| Q12802_SAVIQNTGVGNDNmnsNTW_S3_1                | Q12802  | AKAP13 | 11214 A-kinase anchoring protein 13                             | 19106          | 93.63             | VLSLSVSIQNTGVG                  | 0.295244 | 0.269354 | 0.178834 | 0.130413 | 0.095334 | 0.113667 | 0.113138 | 0.247811 | 0.45655  | 0.152264 | 0.012146 | -1.13116 |          |
| Q12830_ILFTPLAATATASTTTTSTTAAGTGEORQK_T4_1     | Q12830  | BP1F   | 2186 bromodomain PHD finger transcription factor                | 22328          | 88.04             | TWPRFLPTPLAATAT                 | 0.199411 | 0.19474  | 0.180988 | 0.085772 | 0.115691 | 0.104931 | 0.102131 | 0.191713 | 0.523731 | 0.5708   | 0.00098  | -0.90852 |          |
| Q12830_ILTSATSTNSIOSSASQPPRQGGQV_S7_1          | Q12830  | BP1F   | 2186 bromodomain PHD finger transcription factor                | 23223          | 65.56             | KLITSATSTNSIOSS                 | 0.177833 | 0.289556 | 0.249577 | 0.145465 | 0.127015 | 0.118275 | 0.124517 | 0.272322 | 0.521872 | 0.811796 | 0.001071 | -0.93823 |          |
| Q12873_LSPITPEASANPSTSPATPAPSEK_TS_S13_2       | Q12873  | CHD3   | 1107 chromodomain helicase DNA binding protein 3                | 15140.15149    | 87.27.96.52       | FKTSTPEASANPSTSPATPAPSEK        | 0.199333 | 0.200502 | 0.214284 | 0.13193  | 0.177702 | 0.138179 | 0.14927  | 0.202523 | 0.723828 | 0.169134 | 0.019061 | -0.46268 |          |
| Q12873_HLEHECFEPEL_S10_1                       | Q12873  | TRAF2  | 7186 TNF receptor associated factor 2                           | 11650          | 91.57             | EHECFEPEL                       | 0.242843 | 0.242555 | 0.191573 | 0.148886 | 0.161698 | 0.13394  | 0.146927 | 0.256627 | 0.641343 | 0.610032 | 0.015656 | -0.64083 |          |
| Q12968_KTSEDAQAILPK_S3_1                       | Q12968  | NFATC3 | 4775 nuclear factor of activated T-cells 3                      | 5344           | 96.48             | PLKTKTSEDAQAIL                  | 0.220739 | 0.204371 | 0.211891 | 0.108567 | 0.12431  | 0.120574 | 0.117817 | 0.212334 | 0.554869 | 0.99606  | 0.000147 | -0.84978 |          |
| Q12968_H5EDQAALPKGLKLSDDQGSLSIPAR_S3_1         | Q12968  | NFATC3 | 4775 nuclear factor of activated T-cells 3                      | 5344           | 89.47             | DLKTKTSEDAQAIL                  | 0.21455  | 0.234251 | 0.247873 | 0.109494 | 0.163049 | 0.120077 | 0.130873 | 0.234526 | 0.558033 | 0.35656  | 0.00457  | -0.84158 |          |
| Q13029_RFSQQLQPSLSDAGLQK_T6_1                  | Q13029  | PRDM2  | 7799 PR/SET domain 2                                            | 7423           | 88.63             | LKRFSQQLQPSLSD                  | 0.217128 | 0.251084 | 0.257791 | 0.123734 | 0.173026 | 0.158645 | 0.151801 | 0.242031 | 0.627198 | 0.848017 | 0.009544 | -0.67301 |          |
| Q13029_RFSQQLQPSLSDAGLQK_T6_1                  | Q13029  | PRDM2  | 7799 PR/SET domain 2                                            | 5742.5743      | 95.62.95.39       | RRFSQQLQPSLSDAGLQK              | 0.186168 | 0.163109 | 0.218627 | 0.131316 | 0.142302 | 0.112195 | 0.128604 | 0.189301 | 0.679364 | 0.459615 | 0.029712 | -0.56774 |          |
| Q13094_nEDDNDHQWRPLPQALLPMSSNFFPS_S21_S22_S1_1 | Q13094  | LC2    | 3937 lymphocyte cytosolic protein 2                             | 5338.5339.7341 | 25.25.25.25       | QALLPMSSNFFPS                   | 0.218808 | 0.248127 | 0.243385 | 0.160649 | 0.163697 | 0.193761 | 0.172694 | 0.236773 | 0.729363 | 0.849897 | 0.010052 | -0.45529 |          |
| Q13112_OTPDPSSVTVSIVSTEEICSDTQAGQAPL_S21_1     | Q13112  | CHAF1B | 8208 chromatin assembly factor 1 subunit B                      | 5538           | 79.38             | TPDQDPSSVTVSIVS                 | 0.217663 | 0.228952 | 0.177221 | 0.16172  | 0.18604  | 0.166211 | 0.171324 | 0.239609 | 0.175012 | 0.336072 | 0.02008  | -0.48996 |          |
| Q13177_YLSTFTPEKDFPSGTALNAK_S5_1               | Q13177  | PAK2   | 5062 p21 (RAC1) activated kinase 2                              | 5117           | 88.84             | FKYKYLSTFTPEKDF                 | 0.197959 | 0.198697 | 0.155683 | 0.144009 | 0.109967 | 0.114724 | 0.122927 | 0.171468 | 0.716025 | 0.766238 | 0.047438 | -0.48192 |          |
| Q13177_YLSTFTPEKDFPSGTALNAK_S5_1               | Q13177  | PAK2   | 5062 p21 (RAC1) activated kinase 2                              | 5117           | 88.15             | HYGKYLSTFTPEKDF                 | 0.143141 | 0.161995 | 0.149814 | 0.120137 | 0.091117 | 0.087037 | 0.102764 | 0.15285  | 0.672319 | 0.722394 | 0.016844 | -0.57278 |          |
| Q13177_YLSTFTPEKDFPSGTALNAK_S3_1               | Q13177  | PAK2   | 5062 p21 (RAC1) activated kinase 2                              | 5141.7143      | 47.05.47.05       | TKYKYLSTFTPEKDF                 | 0.171282 | 0.161995 | 0.149814 | 0.120137 | 0.091117 | 0.087037 | 0.102764 | 0.15285  | 0.672319 | 0.722394 | 0.016844 | -0.57278 |          |
| Q13177_YLSTFTPEKDFPSGTALNAK_S3_1               | Q13177  | PAK2   | 5062 p21 (RAC1) activated kinase 2                              | 5143.5141.7143 | 31.67.31.67.31.67 | SNYKYLSTFTPEKDF                 | 0.152327 | 0.190238 | 0.196544 | 0.126072 | 0.110184 | 0.142827 | 0.126361 | 0.179643 | 0.703401 | 0.643864 | 0.033366 | -0.50758 |          |
| Q13188_SKT3                                    | Q13188  | STK3   | 6788 serine/threonine kinase 3                                  | 7384           | 98.42             | GMKNKNTSSTK3                    | 0.262523 | 0.265886 | 0.20947  | 0.138661 | 0.115425 | 0.141118 | 0.131735 | 0.27596  | 0.595355 | 0.334334 | 0.04666  | -0.90779 |          |
| Q13206_nSSEVEDGPTSHNR_S1_1                     | Q13206  | DDX10  | 1662 DEAD-box helicase 10                                       | 8829           | 95.47             | KQMGKNSSEVEDG                   | 0.174015 | 0.223047 | 0.216113 | 0.157806 | 0.127154 | 0.138968 | 0.14133  | 0.204392 | 0.691367 | 0.508682 | 0.023631 | -0.53248 |          |
| Q13206_nSSEVEDGPTSHNR_S1_1                     | Q13206  | DDX10  | 1662 DEAD-box helicase 10                                       | 8831           | 93.57             | GMKNSSEVEDG                     | 0.189874 | 0.176438 | 0.218661 | 0.130912 | 0.122544 | 0.149857 | 0.134438 | 0.194991 | 0.689456 | 0.592361 | 0.015112 | -0.53647 |          |
| Q13370_hSAAEKPVRIR_S2_S3_1                     | Q13370  | PDE3B  | 5140 phosphodiesterase 3B                                       | 5279.5280      | 50.50             | PLHPRLSAAEKPVRIR                | 0.180697 | 0.18471  | 0.202567 | 0.128591 | 0.133902 | 0.165376 | 0.142623 | 0.139823 | 0.753325 | 0.510666 | 0.042456 | -0.60886 |          |
| Q13370_rSFGTSGLLPVEQSSR_S3_1                   | Q13370  | PDE3B  | 5140 phosphodiesterase 3B                                       | 5441.5442      | 45.78.45.78       | PFLRLLSFGTSGLLP                 | 0.242432 | 0.247801 | 0.228106 | 0.186141 | 0.131772 | 0.153486 | 0.157133 | 0.239873 | 0.655069 | 0.247139 | 0.008301 | -0.41028 |          |
| Q13370_rSFGTSGLLPVEQSSR_S3_1                   | Q13370  | PDE3B  | 5140 phosphodiesterase 3B                                       | 5442           | 54.02             | YLHPRLSFGTSGLLP                 | 0.276308 | 0.214409 | 0.28606  | 0.166437 | 0.146616 | 0.148623 | 0.153892 | 0.258926 | 0.594394 | 0.146142 | 0.017075 | -0.75062 |          |
| Q13501_S1SS4S2PDSFSPGGNVGGATQSLAEQMRK_T23_S1   | Q13501  | PDZAP1 | 8733 PDZFA associated protein 1                                 | 5176           | 89.97             | GKNVGLS1SS4S2PDS                | 0.241545 | 0.222405 | 0.264036 | 0.143681 | 0.127197 | 0.184763 | 0.178721 | 0.216289 | 0.697614 | 0.265483 | 0.018179 | -0.51385 |          |
| Q13546_mQLDQLDQVAVPSR_S3_1                     | Q13546  | RIPK1  | 8737 receptor interacting serine/threonine kinase 1             | 5320           | 100               | AVYKQLDQLDQVAV                  | 0.183934 | 0.198989 | 0.207973 | 0.136994 | 0.095402 | 0.139179 | 0.123858 | 0.196965 | 0.628833 | 0.930291 | 0.009992 | -0.66925 |          |
| Q13546_mQLDQLDQVAVPSR_S4_1                     | Q13546  | RIPK1  | 8737 receptor interacting serine/threonine kinase 1             | 5320           | 100               | AVYKQLDQLDQVAV                  | 0.245522 | 0.226813 | 0.197405 | 0.111866 | 0.086259 | 0.130806 | 0.109644 | 0.223427 | 0.491132 | 0.91863  | 0.03967  | -1.02582 |          |
| Q13546_rVSHDFPAQRRPVEQNTFGK_S3_1               | Q13546  | RIPK1  | 8737 receptor interacting serine/threonine kinase 1             | 5416           | 100               | EERRRSHDFPAQQ                   | 0.269754 | 0.187206 | 0.222878 | 0.14794  | 0.142249 | 0.112717 | 0.134302 | 0.226613 | 0.592649 | 0.345177 | 0.024607 | -0.75475 |          |
| Q13905_GKRRSPSPVSPASPDGAPLPTOR_T7_S8_1         | Q13905  | RAPGE1 | 2889 Rap guanine nucleotide exchange factor 1                   | 7216.5217      | 49.61.49.61       | RRSPSPVSPASPDGAPLPTOR           | 0.158315 | 0.160887 | 0.181898 | 0.111711 | 0.103838 | 0.144689 | 0.121483 | 0.266637 | 0.59768  | 0.299474 | 0.00748  | -0.87451 |          |
| Q14149_HLSEGTNSYATR_S4_1                       | Q14149  | MORC3  | 23515 MORC family CW-type zinc finger 3                         | 5514           | 100               | SVPRHLSEGTNSYATR                | 0.274255 | 0.2254   | 0.219941 | 0.16805  | 0.150762 | 0.099147 | 0.13932  | 0.398465 | 0.580824 | 0.820755 | 0.020291 | -0.78383 |          |
| Q14149_HLSTRSLINAK_S5_S7_2                     | Q14149  | MORC3  | 23515 MORC family CW-type zinc finger 3                         | 5546.5550      | 87.21.99.23       | NLSLRSLINAK                     | 0.386202 | 0.262882 | 0.267165 | 0.168174 | 0.144459 | 0.091124 | 0.154856 | 0.304616 | 0.440663 | 0.482383 | 0.02116  | -1.18225 |          |
| Q14149_sSILINAK_S5_1                           | Q14149  | MORC3  | 23515 MORC family CW-type zinc finger 3                         | 5550           | 95.6              | RNLSLRSLINAK                    | 0.219666 | 0.247728 | 0.316263 | 0.105886 | 0.068041 | 0.109052 | 0.094326 | 0.171052 | 0.348001 | 0.361337 | 0.004676 | -0.82824 |          |
| Q14164_QDASPPPAPVSPPTKR_S5_1                   | Q14164  | IKBKE  | 9641 inhibitor of nuclear factor kappa B kinase subunit epsilon | 5664           | 100               | RANQDASPPPAPVSPPTKR             | 0.196445 | 0.214972 | 0.172187 | 0.094193 | 0.080657 | 0.143512 | 0.194535 | 0.549511 | 0.592223 | 0.017785 | 0.017785 | -1.57428 |          |
| Q14178_HSLPDVYTL_S3_1                          | Q14178  | PTP2B2 | 9185 protein tyrosine kinase 2 beta                             | 5778           | 100               | HNVFRHSLPDVYTL                  | 0.225835 | 0.194608 | 0.18886  | 0.159731 | 0.133312 | 0.113626 | 0.117603 | 0.207108 | 0.567826 | 0.307972 | 0.021427 | -0.81449 |          |
| Q14498_rYRYSRGR_VS_1                           | Q14498  | RM38P  | 9584 RNA binding motif protein 39                               | 99.09          | 99.09             | YRYSRGR                         | 0.162695 | 0.187455 | 0.17813  | 0.128102 | 0.096363 | 0.13807  | 0.119942 | 0.176093 | 0.681125 | 0.470866 | 0.012155 | -0.55401 |          |
| Q14541_QYSSVPSSTADGDKL_S6_1                    | Q14541  | HNFG4  | 1314 hepatocyte nuclear factor 4 gamma                          | 5121           | 87.61             | SQYSSVPSSTADGDKL                | 0.187249 | 0.206124 | 0.174175 | 0.153919 | 0.105323 | 0.147939 | 0.135727 | 0.189183 | 0.717439 | 0.53734  | 0.040421 | -0.47007 |          |
| Q14653_sPLNDPTTFNGLGSPEN                       |         |        |                                                                 |                |                   |                                 |          |          |          |          |          |          |          |          |          |          |          |          |          |

|                                                        |        |        |                                                           |                                    |                   |                                        |                        |          |          |          |          |          |          |          |          |          |          |          |          |
|--------------------------------------------------------|--------|--------|-----------------------------------------------------------|------------------------------------|-------------------|----------------------------------------|------------------------|----------|----------|----------|----------|----------|----------|----------|----------|----------|----------|----------|----------|
| Q16204_V5SP1PPTPAPSSSRPSPGLSYASHYVGTFFPTLSTR_S1_Q16204 | CDC6   | 8030   | coiled-coil domain containing 6                           | S352.S367                          | 73.3,52.11        | LRPRTVSP1PTPPTP...PSSSRPISPLGYSAY      | 0.221094               | 0.216882 | 0.262549 | 0.122672 | 0.120932 | 0.127241 | 0.123615 | 0.256955 | 0.252949 | 0.031509 | -0.91752 |          |          |
| Q16152_dPPSPSSSLQSTAPALPSETQTPGALCSPLRK_Q16152         | PKN1   | 5585   | protein kinase N1                                         | S573.S575                          | 43.91,43.91       | SSRDPSSPSSSSSR...RDPPSPSSSPLSQI        | 0.149137               | 0.190103 | 0.165883 | 0.114395 | 0.121615 | 0.139101 | 0.125037 | 0.168368 | 0.742641 | 0.551138 | 0.036176 | -0.42926 |          |
| Q16153_sLPFESVAVIQ_S5_1                                | PKN2   | 5586   | protein kinase N2                                         | S25                                |                   | 99.9 DSRRSPLFESSVAVIQ                  | 0.238703               | 0.246610 | 0.254826 | 0.145007 | 0.171127 | 0.111892 | 0.145342 | 0.242765 | 0.598696 | 0.294641 | 0.030694 | -0.74011 |          |
| Q1M515_Q1RRPVSIVSR_S6_1                                | CSPP1  | 29848  | centrosome and spindle pole associated protein 1          | S901                               |                   | 100 SKLGRSPVDSVIRIS                    | 0.195863               | 0.249246 | 0.180158 | 0.134164 | 0.115076 | 0.160658 | 0.136633 | 0.208422 | 0.655557 | 0.570934 | 0.044019 | -0.60921 |          |
| Q2KH13_sRNVVGGGGHMK_S3_1                               | Q2KH13 | 73724  | C-type lectin domain family 16 member A                   | S707                               |                   | 92.03 MFKGRSRRVGGGHS                   | 0.242029               | 0.243711 | 0.203081 | 0.193225 | 0.125511 | 0.130310 | 0.130588 | 0.206287 | 0.655853 | 0.554495 | 0.055018 | -0.60856 |          |
| Q2KH18_Q2KH18AP2ASSOCIATEKINASE1                       | AAK1   | 22848  | AP2 associated kinase 1                                   | T681.S682                          | 50.50             | 100 TFGSGRRSSGTVYVM...PFGSGRVSQQNVYMP  | 0.261123               | 0.285395 | 0.287862 | 0.179302 | 0.153138 | 0.157324 | 0.254477 | 0.62556  | 0.418669 | 0.021573 | -0.57689 |          |          |
| Q2B726_IH5EAEFTPKL_S3_1                                | Q2B726 | 211830 | TWIST neighbor                                            | S316                               |                   | 100 KQKTRRSHSTFWAS                     | 0.206781               | 0.165989 | 0.207144 | 0.118296 | 0.159749 | 0.141942 | 0.139995 | 0.193205 | 0.742421 | 0.871719 | 0.042748 | -0.45653 |          |
| Q3V672_Q2HDFLTL_T2_S3_1                                | Q3V672 | 55704  | coiled-coil domain containing 88A                         | T1819.S1820                        | 50.50             | 100 ABCTTTRTSIHDHFLT...EGTTRTSIHDHFLTE | 0.26354                | 0.262231 | 0.212278 | 0.154843 | 0.137611 | 0.152218 | 0.148224 | 0.204616 | 0.633391 | 0.218607 | 0.006122 | -0.65885 |          |
| Q4KM77_Q4PQLGSSSLISPLGLK_S10_1                         | Q4KM77 | 26000  | TBC1 domain family member 10B                             | S658                               |                   | 93.21 PPLGSPKSSLSLDPGL                 | 0.297735               | 0.269727 | 0.221225 | 0.127533 | 0.126279 | 0.159984 | 0.151732 | 0.262896 | 0.577157 | 0.619503 | 0.014465 | -0.79296 |          |
| Q4KMQ2_m1EAVDNNLRKPE_S13_1                             | Q4KMQ2 | 196527 | anoctamin 6                                               | S909                               |                   | 100 DNNLRPKSLE                         | 0.216957               | 0.187183 | 0.188675 | 0.10305  | 0.121291 | 0.112888 | 0.11241  | 0.197605 | 0.568886 | 0.45701  | 0.005111 | -0.81385 |          |
| Q4L180_nSNSNSVITDENK_S6_S7_1                           | Q4L180 | 11259  | filamin A interacting protein 1 like                      | S1052.S1053                        | 49.7,49.7         | 100 QRNSNSSSPVTTED...RNSNSSSVITTEK     | 0.144888               | 0.174954 | 0.171746 | 0.112359 | 0.105071 | 0.110484 | 0.109505 | 0.163863 | 0.668271 | 0.105284 | 0.005156 | -0.58149 |          |
| Q53E70_q5FTPMrPLTSSITQGVPLDTSK_S3_1                    | Q53E70 | 200186 | CREB regulated transcription coactivator 2                | S456                               |                   | 99.92 Q4LTKPQFPSTMTD...S456            | 0.284837               | 0.349058 | 0.229656 | 0.158109 | 0.086184 | 0.119318 | 0.145804 | 0.272524 | 0.535011 | 0.659249 | 0.003039 | -0.90236 |          |
| Q53Q23_nH5QHILK_S1_1                                   | Q53Q23 | 158483 | Rho GTPase activating protein 15                          | S64                                |                   | 100 SRHRNNHSQIHLVDG                    | 0.205561               | 0.201943 | 0.180302 | 0.120963 | 0.102355 | 0.135353 | 0.119557 | 0.195935 | 0.610187 | 0.810695 | 0.003511 | -0.71268 |          |
| Q53Q23_sMILTGVGK_S1_1                                  | Q53Q23 | 158483 | Rho GTPase activating protein 15                          | S64                                |                   | 100 DRLSGLQKMLTVDG                     | 0.331604               | 0.307498 | 0.260754 | 0.143978 | 0.129856 | 0.147056 | 0.140447 | 0.299952 | 0.468231 | 0.125975 | 0.001757 | -1.09471 |          |
| Q53T74_gsmPAYSNGMMKDSSEINSEVAAR_Y6_1                   | Q53T74 | 79901  | cytochrome b reductase 1                                  | Y252                               |                   | 58.05 ARGSMFAYSNGMMK                   | 0.214409               | 0.174963 | 0.19856  | 0.134047 | 0.147561 | 0.159971 | 0.147193 | 0.196044 | 0.750817 | 0.594245 | 0.023648 | -0.41347 |          |
| Q58A45_r5HTNPASVYVMPSSASTSVNPPSTPSSGQVIOK_Q58A45       | Q58A45 | 255967 | PAH3 poly (A) specific ribonuclease subunit               | S374                               |                   | 49.64 ASTVWYVSSASTVNP                  | 0.304443               | 0.254467 | 0.21725  | 0.117493 | 0.100982 | 0.144679 | 0.166855 | 0.25872  | 0.644963 | 0.330039 | 0.02393  | -0.63271 |          |
| Q58A45_r5HTNPASVYVMPSSASTSVNPPSTPSSGQVIOK_Q58A45       | Q58A45 | 255967 | PAH3 poly (A) specific ribonuclease subunit               | S361.T363                          | 49.49,49.49       | 100 SPFRRSRSHSTFWAS...APFRRSRSHSTFWAS  | 0.295205               | 0.280826 | 0.217181 | 0.1618   | 0.168139 | 0.133919 | 0.154619 | 0.264437 | 0.584711 | 0.312971 | 0.017383 | -0.77421 |          |
| Q58A45_sHNPASVYVMPSSASTSVNPPSTPSSGQVIOK_T_Q58A45       | Q58A45 | 255967 | PAH3 poly (A) specific ribonuclease subunit               | T363                               |                   | 87.53 APRRSRSHSTFWAS                   | 0.293305               | 0.329568 | 0.191173 | 0.168058 | 0.129195 | 0.14256  | 0.146604 | 0.217386 | 0.540205 | 0.140582 | 0.044025 | -0.88842 |          |
| Q5HY13_IEMKSPAG8NDGSDGDTNVLQSLK_S12_1                  | Q5HY13 | 143684 | family with sequence similarity 76 member B               | T333                               |                   | 66.25 RGRSDSSISNQSDAS                  | 0.262627               | 0.241927 | 0.224844 | 0.150189 | 0.146114 | 0.202311 | 0.162605 | 0.204863 | 0.673322 | 0.617339 | 0.020725 | -0.57063 |          |
| Q5J8M3_gRSDRGGQGDSPYVGVLDK_S5_S7_1                     | Q5J8M3 | 51234  | ER membrane protein complex subunit 4                     | S32.S36                            | 49.96,49.96       | 66.25 GGGSRDRSGSDGSGG...RGRSDRSGSDGSGG | 0.191422               | 0.195849 | 0.198858 | 0.094142 | 0.112642 | 0.094074 | 0.100286 | 0.193576 | 0.513296 | 0.217795 | 0.00013  | -0.96214 |          |
| Q5J8M3_gRSDRGGQGDSPYVGVLDK_S7_1                        | Q5J8M3 | 51234  | ER membrane protein complex subunit 4                     | S36                                |                   | 90.77 RGRSDRSGSDGSDLY                  | 0.215689               | 0.165115 | 0.228254 | 0.095264 | 0.1256   | 0.097151 | 0.106005 | 0.203019 | 0.522142 | 0.401918 | 0.010977 | -0.93748 |          |
| Q5J8M3_sDRSGQGDSPYVGVLDK_S1_1                          | Q5J8M3 | 51234  | ER membrane protein complex subunit 4                     | S32                                |                   | 99.49 GGGSRDRSGSDGSDLY                 | 0.216867               | 0.186843 | 0.280095 | 0.103913 | 0.155591 | 0.147196 | 0.135567 | 0.227935 | 0.59476  | 0.506811 | 0.043938 | -0.74962 |          |
| Q5J8M3_sDRSGQGDSPYVGVLDK_S5_1                          | Q5J8M3 | 51234  | ER membrane protein complex subunit 4                     | S36                                |                   | 92.03 RGRSDRSGSDGSDLY                  | 0.212626               | 0.204398 | 0.259303 | 0.090937 | 0.173421 | 0.132006 | 0.132211 | 0.225442 | 0.586054 | 0.680307 | 0.03342  | -0.77089 |          |
| Q5J8M3_sDRSGQGDSPYVGVLDK_Y12_1                         | Q5J8M3 | 51234  | ER membrane protein complex subunit 4                     | Y43                                |                   | 84.21 SGQGDLYVYPVGLDK                  | 0.195173               | 0.226602 | 0.211609 | 0.078161 | 0.111382 | 0.12841  | 0.115869 | 0.211258 | 0.548811 | 0.675884 | 0.001005 | -0.86562 |          |
| Q5J8R6_w5AEAGSPGSPDPSG52ATmN5SRSGPvR_P2R_S3I8R6        | Q5J8R6 | 379506 | MIA family member 3, ER export factor                     | S1741.S1744.S1                     | 52.41,45.63,49.48 | 100 ATMMNSRSGSPTRVLD...MNSRSGSPTRVLD   | 0.225444               | 0.256716 | 0.213654 | 0.13307  | 0.183233 | 0.134955 | 0.157086 | 0.230052 | 0.675625 | 0.874512 | 0.01589  | -0.56571 |          |
| Q5JTD0_q5FEELIPAFK_S1_1                                | Q5JTD0 | 39643  | high junction associated protein 1                        | S3943                              |                   | 100 SLGTARSRSGSLEPFL                   | 0.176582               | 0.212427 | 0.195129 | 0.109398 | 0.145923 | 0.148834 | 0.134718 | 0.194306 | 0.69011  | 0.824668 | 0.023646 | -0.52905 |          |
| Q5M775_r5AETDNLNKGTAASGVVVR_S5_S4_1                    | Q5M775 | 92521  | sporoin antigen with calponin homology and coiled-coil do | SS4.S55                            | 49.67,49.67       | 100 SRTLRNKRSHSTFWAS...SRLKRASSEDTLNKP | 0.24331                | 0.2005   | 0.191486 | 0.156349 | 0.163932 | 0.153341 | 0.157874 | 0.21765  | 0.745513 | 0.074811 | 0.029721 | -0.42369 |          |
| Q5P879_sMULPTSPVQVQVSGPVELEGAR_S3_1                    | Q5P879 | 55095  | sterile alpha motif domain containing 4B                  | S238                               |                   | 87.73 SPLKNSMILLTSPQ                   | 0.24107                | 0.242789 | 0.258478 | 0.210546 | 0.105197 | 0.121635 | 0.145792 | 0.247464 | 0.589189 | 0.055702 | 0.03755  | -0.7632  |          |
| Q5Q828_T2SSDILTSSSSGPR_S3_1                            | Q5Q828 | 424F10 | 79269                                                     | DDB1 and CUL4 associated factor 10 | S349              |                                        | 76.84 LRRARTRTSSSDILTS | 0.178172 | 0.259474 | 0.238676 | 0.125568 | 0.090991 | 0.154579 | 0.123713 | 0.225441 | 0.548759 | 0.724576 | 0.029067 | -0.86575 |
| Q5T200_sKSLSPSPLR_S1_1                                 | Q5T200 | 23931  | zinc finger CCH-type containing 13                        | S204                               |                   | 72.87 VSPEVVRKSLSPSS                   | 0.221532               | 0.20691  | 0.228086 | 0.155159 | 0.158855 | 0.170116 | 0.161377 | 0.21677  | 0.744462 | 0.45755  | 0.004154 | -0.42573 |          |
| Q5T5Y3_sPQGGDILTSESPDFLEPMVAVPKAK_S1_1                 | Q5T5Y3 | 157922 | calmodulin regulated spectrin associated protein 1        | S575                               |                   | 100 GLTANRSPQGGDILT                    | 0.197777               | 0.191832 | 0.224222 | 0.094593 | 0.135992 | 0.117219 | 0.114105 | 0.204611 | 0.575668 | 0.814497 | 0.040389 | -0.84252 |          |
| Q5T6Y3_kASGTAYAGPPTSALPAQR_S3_1                        | Q5T6Y3 | 27245  | AT-hook DNA binding motif containing 1                    | S868                               |                   | 100 PRFSKASGTAYAGP                     | 0.226563               | 0.244901 | 0.248533 | 0.157325 | 0.194585 | 0.180079 | 0.177333 | 0.299997 | 0.338992 | 0.564424 | 0.008067 | -0.43566 |          |
| Q5V522_nTGVSPASRPPTGTPTSSMLTSLGK_S5_1                  | Q5V522 | 23248  | regulation of nuclear pre-mRNA domain containing 2        | S473                               |                   | 87.74 VMKTRVSPASRPSP                   | 0.242971               | 0.203886 | 0.177142 | 0.130609 | 0.128977 | 0.157221 | 0.138936 | 0.206    | 0.687802 | 0.608786 | 0.019095 | -0.53993 |          |
| Q5VU44_v5PAHRPVLQQLK_S2_S7_2                           | Q5VU44 | 24149  | zinc finger protein 318                                   | S2030.S2035                        | 99.99,92.48       | 100 DCTTRVSPFAHRSP...RVSFAHRSPVTLQK    | 0.194991               | 0.173992 | 0.171247 | 0.114046 | 0.121594 | 0.126393 | 0.102676 | 0.162076 | 0.744574 | 0.207123 | 0.027001 | -0.42551 |          |
| Q5VZ89_r5SYGYAK_S3_1                                   | Q5VZ89 | 55667  | DENN domain containing 4C                                 | S1184                              |                   | 100 DLNRNRSYLYGVAR                     | 0.250482               | 0.225675 | 0.210949 | 0.156241 | 0.127746 | 0.138715 | 0.157046 | 0.231035 | 0.679747 | 0.510663 | 0.020434 | -0.55993 |          |
| Q5VZ93_r5WYAGQAEYQK_Q5_1                               | Q5VZ93 | 55667  | DENN domain containing 4C                                 | T1324                              |                   | 93.75 RTRNRSYLYGVAR                    | 0.250482               | 0.225675 | 0.210949 | 0.156241 | 0.127746 | 0.138715 | 0.157046 | 0.231035 | 0.679747 | 0.510663 | 0.020434 | -0.55993 |          |
| Q5ZK9_r5WYAGQAEYQK_Q5_1                                | Q5ZK9  | 55667  | DENN domain containing 4C                                 | S304                               |                   | 100 EYRTRNRSYLYGVAR                    | 0.250482               | 0.225675 | 0.210949 | 0.156241 | 0.127746 | 0.138715 | 0.157046 | 0.231035 | 0.679747 | 0.510663 | 0.020434 | -0.55993 |          |
| Q5ZK9_r5WYAGQAEYQK_Q5_1                                | Q5ZK9  | 55667  | DENN domain containing 4C                                 | S304                               |                   | 100 EYRTRNRSYLYGVAR                    | 0.250482               | 0.225675 | 0.210949 | 0.156241 | 0.127746 | 0.138715 | 0.157046 | 0.231035 | 0.679747 | 0.510663 | 0.020434 | -0.55993 |          |
| Q5ZK9_r5WYAGQAEYQK_Q5_1                                | Q5ZK9  | 55667  | DENN domain containing 4C                                 | S304                               |                   | 100 EYRTRNRSYLYGVAR                    | 0.250482               | 0.225675 | 0.210949 | 0.156241 | 0.127746 | 0.138715 | 0.157046 | 0.231035 | 0.679747 | 0.510663 | 0.020434 | -0.55993 |          |
| Q5ZK9_r5WYAGQAEYQK_Q5_1                                | Q5ZK9  | 55667  | DENN domain containing 4C                                 | S304                               |                   | 100 EYRTRNRSYLYGVAR                    | 0.250482               | 0.225675 | 0.210949 | 0.156241 | 0.127746 | 0.138715 | 0.157046 | 0.231035 | 0.679747 | 0.510663 | 0.020434 | -0.55993 |          |
| Q5ZK9_r5WYAGQAEYQK_Q5_1                                | Q5ZK9  | 55667  | DENN domain containing 4C                                 | S304                               |                   | 100 EYRTRNRSYLYGVAR                    | 0.250482               | 0.225675 | 0.210949 | 0.156241 | 0.127746 | 0.138715 | 0.157046 | 0.231035 | 0.679747 | 0.510663 | 0.020434 | -0.55993 |          |
| Q5ZK9_r5WYAGQAEYQK_Q5_1                                | Q5ZK9  | 55667  | DENN domain containing 4C                                 | S304                               |                   | 100 EYRTRNRSYLYGVAR                    | 0.250482               | 0.225675 | 0.210949 | 0.156241 | 0.127746 | 0.138715 | 0.157046 | 0.231035 | 0.679747 | 0.510663 | 0.020434 | -0.55993 |          |
| Q5ZK9_r5WYAGQAEYQK_Q5_1                                | Q5ZK9  | 55667  | DENN domain containing 4C                                 | S304                               |                   | 100 EYRTRNRSYLYGVAR                    | 0.250482               | 0.225675 | 0.210949 | 0.156241 | 0.127746 | 0.138715 | 0.157046 | 0.231035 | 0.679747 | 0.510663 | 0.020434 | -0.55993 |          |
| Q5ZK9_r5WYAGQAEYQK_Q5_1                                | Q5ZK9  | 55667  | DENN domain containing 4C                                 | S304                               |                   | 100 EYRTRNRSYLYGVAR                    | 0.250482               | 0.225675 | 0.210949 | 0.156241 | 0.127746 | 0.138715 | 0.157046 | 0.231035 | 0.679747 | 0.510663 | 0.020434 | -0.55993 |          |
| Q5ZK9_r5WYAGQAEYQK_Q5_1                                | Q5ZK9  | 55667  | DENN domain containing 4C                                 | S304                               |                   | 100 EYRTRNRSYLYGVAR                    | 0.250482               | 0.225675 | 0.210949 | 0.156241 | 0.127746 | 0.138715 | 0.157046 | 0.231035 | 0.679747 | 0.510663 | 0.020434 | -0.55993 |          |
| Q5ZK9_r5WYAGQAEYQK_Q5_1                                | Q5ZK9  | 55667  | DENN domain containing 4C                                 | S304                               |                   | 100 EYRTRNRSYLYGVAR                    | 0.250482               | 0.225675 | 0.210949 | 0.156241 | 0.127746 | 0.138715 | 0.157046 | 0.231035 | 0.679747 | 0.510663 | 0.020434 | -0.55993 |          |
| Q5ZK9_r5WYAGQAEYQK_Q5_1                                | Q5ZK9  | 55667  | DENN domain containing 4C                                 | S304                               |                   | 100 EYRTRNRSYLYGVAR                    | 0.250482               | 0.225675 | 0.210949 | 0.156241 | 0.127746 | 0.138715 | 0.157046 | 0.231035 | 0.679747 | 0.510663 | 0.020434 | -0.55993 |          |
| Q5ZK9_r5WYAGQAEYQK_Q5_1                                | Q5ZK9  | 55667  | DENN domain containing 4C                                 | S304                               |                   | 100 EYRTRNRSYLYGVAR                    | 0.250482               | 0.225675 | 0.210949 | 0.156241 | 0.127746 | 0.138715 | 0.157046 | 0.231035 | 0.679747 | 0.510663 | 0.020434 | -0.55993 |          |
| Q5ZK9_r5WYAGQAEYQK_Q5_1                                | Q5ZK9  | 55667  | DENN domain containing 4C                                 | S304                               |                   | 100 EYRTRNRSYLYGVAR                    | 0.250482               | 0.225675 | 0.210949 | 0.156241 | 0.127746 | 0.138715 | 0.157046 | 0.231035 | 0.679747 |          |          |          |          |

|                                      |        |         |        |                                                  |           |             |                             |                 |          |          |          |          |          |          |          |          |          |          |          |          |          |
|--------------------------------------|--------|---------|--------|--------------------------------------------------|-----------|-------------|-----------------------------|-----------------|----------|----------|----------|----------|----------|----------|----------|----------|----------|----------|----------|----------|----------|
| Q86V55_g5GHVLPAGAGLN2_S1             | Q86V55 | PRAG1   | 157285 | PEAK1 related, kinase-activating pseudokinase 1  | S889      | 100         | LKFAFGKSGHNLPA              | 0.3302          | 0.34002  | 0.34902  | 0.168829 | 0.137273 | 0.182088 | 0.16273  | 0.341069 | 0.477118 | 0.30384  | 0.000247 | -1.06758 |          |          |
| Q86V55_HHPFVSSDPLEK_S5_7             | Q86V55 | PRAG1   | 157285 | PEAK1 related, kinase-activating pseudokinase 1  | S877.5878 | 48.72,48.72 | NRHVFVSSDPLEK_RHHVFVSSDPLEK | 0.273568        | 0.282801 | 0.260441 | 0.117038 | 0.179796 | 0.130729 | 0.142521 | 0.236303 | 0.603127 | 0.965136 | 0.026792 | -0.72947 |          |          |
| Q86V55_LKFAVFPVGGSTGSPQQPPPLQK_S10_1 | Q86V55 | PRAG1   | 157285 | PEAK1 related, kinase-activating pseudokinase 1  | S798      |             | 74.74                       | FAPVFGSSSTGSDVS | 0.27516  | 0.249298 | 0.183022 | 0.13024  | 0.151294 | 0.112822 | 0.191495 | 0.597658 | 0.490831 | 0.016939 | -0.74261 |          |          |
| Q86V55_SAFAPFPK_S1_S3_1              | Q86V55 | PRAG1   | 157285 | PEAK1 related, kinase-activating pseudokinase 1  | S694.5696 | 50,50       | Y6GKSKSASFAPEFK             | 0.267255        | 0.261518 | 0.203607 | 0.16946  | 0.106703 | 0.167204 | 0.147789 | 0.244116 | 0.605403 | 0.988682 | 0.029032 | -0.72403 |          |          |
| Q8U181_sPQPPALHPTK_S1_1              | Q8U181 | IRF2BP1 | 26145  | interferon regulatory factor 2 binding protein 1 | S66       |             | 100                         | HYLVEKSSSFAPEFK | 0.172925 | 0.166021 | 0.189948 | 0.117327 | 0.122203 | 0.107620 | 0.175988 | 0.125202 | 0.175988 | 0.711421 | 0.508965 | 0.012109 | -0.49122 |
| Q8U181_sPQPPALHPTK_S1_2              | Q8U181 | IRF2BP1 | 26145  | interferon regulatory factor 2 binding protein 1 | S69       |             | 100                         | HYLVEKSSSFAPEFK | 0.191776 | 0.207165 | 0.189948 | 0.117327 | 0.122203 | 0.107620 | 0.175988 | 0.125202 | 0.175988 | 0.711421 | 0.508965 | 0.012109 | -0.49122 |
| Q8U181_sPQPPALHPTK_S1_3              | Q8U181 | IRF2BP1 | 26145  | interferon regulatory factor 2 binding protein 1 | S66       |             | 100                         | HYLVEKSSSFAPEFK | 0.232515 | 0.296092 | 0.240019 | 0.168566 | 0.117484 | 0.153312 | 0.146454 | 0.253209 | 0.578293 | 0.644161 | 0.016106 | -0.78888 |          |
| Q8U181_sPQPPALHPTK_S1_4              | Q8U181 | IRF2BP1 | 26145  | interferon regulatory factor 2 binding protein 1 | S66       |             | 100                         | HYLVEKSSSFAPEFK | 0.208418 | 0.268522 | 0.28701  | 0.136881 | 0.148602 | 0.116139 | 0.148934 | 0.254605 | 0.584858 | 0.162556 | 0.012938 | -0.77384 |          |
| Q8U181_sPQPPALHPTK_S1_5              | Q8U181 | IRF2BP1 | 26145  | interferon regulatory factor 2 binding protein 1 | S66       |             | 100                         | HYLVEKSSSFAPEFK | 0.207848 | 0.205136 | 0.192911 | 0.114428 | 0.128486 | 0.151886 | 0.141591 | 0.201965 | 0.701609 | 0.201801 | 0.013981 | -0.51237 |          |
| Q8U181_sPQPPALHPTK_S1_6              | Q8U181 | IRF2BP1 | 26145  | interferon regulatory factor 2 binding protein 1 | S66       |             | 100                         | HYLVEKSSSFAPEFK | 0.170778 | 0.149874 | 0.194308 | 0.134208 | 0.117478 | 0.088011 | 0.115001 | 0.171653 | 0.66996  | 0.92098  | 0.040124 | -0.57785 |          |
| Q8U181_sPQPPALHPTK_S1_7              | Q8U181 | IRF2BP1 | 26145  | interferon regulatory factor 2 binding protein 1 | S66       |             | 100                         | HYLVEKSSSFAPEFK | 0.3248   | 0.24327  | 0.193978 | 0.067535 | 0.078789 | 0.065334 | 0.069286 | 0.254016 | 0.272762 | 0.015445 | 0.03917  | -1.87429 |          |
| Q8U181_sPQPPALHPTK_S1_8              | Q8U181 | IRF2BP1 | 26145  | interferon regulatory factor 2 binding protein 1 | S66       |             | 100                         | HYLVEKSSSFAPEFK | 0.158662 | 0.16549  | 0.136574 | 0.11599  | 0.094524 | 0.106416 | 0.105743 | 0.145975 | 0.724394 | 0.564424 | 0.029065 | -0.46515 |          |
| Q8U181_sPQPPALHPTK_S1_9              | Q8U181 | IRF2BP1 | 26145  | interferon regulatory factor 2 binding protein 1 | S66       |             | 100                         | HYLVEKSSSFAPEFK | 0.22409  | 0.175473 | 0.251097 | 0.09654  | 0.144484 | 0.099323 | 0.113449 | 0.216886 | 0.523081 | 0.660587 | 0.018686 | -0.93489 |          |
| Q8U181_sPQPPALHPTK_S1_10             | Q8U181 | IRF2BP1 | 26145  | interferon regulatory factor 2 binding protein 1 | S66       |             | 100                         | HYLVEKSSSFAPEFK | 0.152499 | 0.178696 | 0.149966 | 0.092255 | 0.092547 | 0.114739 | 0.099847 | 0.160537 | 0.621954 | 0.799965 | 0.006723 | -0.68512 |          |
| Q8U181_sPQPPALHPTK_S1_11             | Q8U181 | IRF2BP1 | 26145  | interferon regulatory factor 2 binding protein 1 | S66       |             | 100                         | HYLVEKSSSFAPEFK | 0.178542 | 0.207503 | 0.184668 | 0.119767 | 0.134961 | 0.115352 | 0.128753 | 0.190237 | 0.676803 | 0.42943  | 0.003472 | -0.56319 |          |
| Q8U181_sPQPPALHPTK_S1_12             | Q8U181 | IRF2BP1 | 26145  | interferon regulatory factor 2 binding protein 1 | S66       |             | 100                         | HYLVEKSSSFAPEFK | 0.23654  | 0.231554 | 0.251152 | 0.173795 | 0.158348 | 0.153732 | 0.161954 | 0.239748 | 0.675518 | 0.968435 | 0.000774 | -0.56959 |          |
| Q8U181_sPQPPALHPTK_S1_13             | Q8U181 | IRF2BP1 | 26145  | interferon regulatory factor 2 binding protein 1 | S66       |             | 100                         | HYLVEKSSSFAPEFK | 0.242127 | 0.276941 | 0.185281 | 0.115947 | 0.146368 | 0.157156 | 0.139824 | 0.234783 | 0.959545 | 0.351662 | 0.002362 | -0.74772 |          |
| Q8U181_sPQPPALHPTK_S1_14             | Q8U181 | IRF2BP1 | 26145  | interferon regulatory factor 2 binding protein 1 | S66       |             | 100                         | HYLVEKSSSFAPEFK | 0.202028 | 0.262939 | 0.204885 | 0.172416 | 0.152786 | 0.16961  | 0.164937 | 0.229564 | 0.719108 | 0.22158  | 0.024928 | -0.47572 |          |
| Q8U181_sPQPPALHPTK_S1_15             | Q8U181 | IRF2BP1 | 26145  | interferon regulatory factor 2 binding protein 1 | S66       |             | 100                         | HYLVEKSSSFAPEFK | 0.183444 | 0.172825 | 0.164982 | 0.079648 | 0.089832 | 0.131218 | 0.247859 | 0.106302 | 0.251815 | 0.090913 | 0.007608 | -0.76508 |          |
| Q8U181_sPQPPALHPTK_S1_16             | Q8U181 | IRF2BP1 | 26145  | interferon regulatory factor 2 binding protein 1 | S66       |             | 100                         | HYLVEKSSSFAPEFK | 0.244757 | 0.272652 | 0.229026 | 0.137146 | 0.088234 | 0.110688 | 0.122419 | 0.046297 | 0.338262 | 0.001468 | -1.05597 |          |          |
| Q8U181_sPQPPALHPTK_S1_17             | Q8U181 | IRF2BP1 | 26145  | interferon regulatory factor 2 binding protein 1 | S66       |             | 100                         | HYLVEKSSSFAPEFK | 0.192808 | 0.220669 | 0.243481 | 0.120697 | 0.085462 | 0.10397  | 0.102186 | 0.221719 | 0.489122 | 0.637481 | 0.002768 | -1.11363 |          |
| Q8U181_sPQPPALHPTK_S1_18             | Q8U181 | IRF2BP1 | 26145  | interferon regulatory factor 2 binding protein 1 | S66       |             | 100                         | HYLVEKSSSFAPEFK | 0.239664 | 0.232005 | 0.247168 | 0.164917 | 0.143519 | 0.130201 | 0.146212 | 0.239612 | 0.610203 | 0.315633 | 0.001062 | -0.71264 |          |
| Q8U181_sPQPPALHPTK_S1_19             | Q8U181 | IRF2BP1 | 26145  | interferon regulatory factor 2 binding protein 1 | S66       |             | 100                         | HYLVEKSSSFAPEFK | 0.22452  | 0.258947 | 0.260112 | 0.138728 | 0.115992 | 0.138921 | 0.131218 | 0.247859 | 0.105643 | 0.956689 | 0.001115 | -0.91266 |          |
| Q8U181_sPQPPALHPTK_S1_20             | Q8U181 | IRF2BP1 | 26145  | interferon regulatory factor 2 binding protein 1 | S66       |             | 100                         | HYLVEKSSSFAPEFK | 0.287111 | 0.358478 | 0.343046 | 0.240663 | 0.16893  | 0.199886 | 0.194493 | 0.329545 | 0.590187 | 0.557317 | 0.006125 | -0.76076 |          |
| Q8U181_sPQPPALHPTK_S1_21             | Q8U181 | IRF2BP1 | 26145  | interferon regulatory factor 2 binding protein 1 | S66       |             | 100                         | HYLVEKSSSFAPEFK | 0.263391 | 0.308023 | 0.252465 | 0.20151  | 0.131311 | 0.158237 | 0.163866 | 0.274626 | 0.596032 | 0.817084 | 0.014    | -0.74654 |          |
| Q8U181_sPQPPALHPTK_S1_22             | Q8U181 | IRF2BP1 | 26145  | interferon regulatory factor 2 binding protein 1 | S66       |             | 100                         | HYLVEKSSSFAPEFK | 0.195963 | 0.151393 | 0.16552  | 0.117493 | 0.118613 | 0.136594 | 0.124234 | 0.147625 | 0.711138 | 0.551084 | 0.021197 | -0.43129 |          |
| Q8U181_sPQPPALHPTK_S1_23             | Q8U181 | IRF2BP1 | 26145  | interferon regulatory factor 2 binding protein 1 | S66       |             | 100                         | HYLVEKSSSFAPEFK | 0.148847 | 0.155491 | 0.195112 | 0.111849 | 0.123852 | 0.10669  | 0.11213  | 0.166353 | 0.67405  | 0.349943 | 0.027491 | -0.56907 |          |
| Q8U181_sPQPPALHPTK_S1_24             | Q8U181 | IRF2BP1 | 26145  | interferon regulatory factor 2 binding protein 1 | S66       |             | 100                         | HYLVEKSSSFAPEFK | 0.198571 | 0.196512 | 0.16185  | 0.133141 | 0.095952 | 0.140393 | 0.123162 | 0.167285 | 0.794569 | 0.746409 | 0.026611 | -0.56927 |          |
| Q8U181_sPQPPALHPTK_S1_25             | Q8U181 | IRF2BP1 | 26145  | interferon regulatory factor 2 binding protein 1 | S66       |             | 100                         | HYLVEKSSSFAPEFK | 0.29472  | 0.297398 | 0.24764  | 0.106628 | 0.105605 | 0.109335 | 0.107189 | 0.279919 | 0.382929 | 0.009442 | 0.008399 | -1.38485 |          |
| Q8U181_sPQPPALHPTK_S1_26             | Q8U181 | IRF2BP1 | 26145  | interferon regulatory factor 2 binding protein 1 | S66       |             | 100                         | HYLVEKSSSFAPEFK | 0.129421 | 0.174688 | 0.197316 | 0.11932  | 0.134556 | 0.159594 | 0.13661  | 0.181402 | 0.753082 | 0.723552 | 0.028102 | -0.40912 |          |
| Q8U181_sPQPPALHPTK_S1_27             | Q8U181 | IRF2BP1 | 26145  | interferon regulatory factor 2 binding protein 1 | S66       |             | 100                         | HYLVEKSSSFAPEFK | 0.201422 | 0.152137 | 0.202301 | 0.125773 | 0.143085 | 0.125916 | 0.131591 | 0.185287 | 0.710203 | 0.214607 | 0.037641 | -0.4937  |          |
| Q8U181_sPQPPALHPTK_S1_28             | Q8U181 | IRF2BP1 | 26145  | interferon regulatory factor 2 binding protein 1 | S66       |             | 100                         | HYLVEKSSSFAPEFK | 0.21808  | 0.166704 | 0.221493 | 0.152832 | 0.135261 | 0.1522   | 0.146764 | 0.202092 | 0.726225 | 0.19077  | 0.041168 | -0.46151 |          |
| Q8U181_sPQPPALHPTK_S1_29             | Q8U181 | IRF2BP1 | 26145  | interferon regulatory factor 2 binding protein 1 | S66       |             | 100                         | HYLVEKSSSFAPEFK | 0.29831  | 0.352112 | 0.316121 | 0.132692 | 0.127661 | 0.152627 | 0.13766  | 0.302688 | 0.454791 | 0.10073  | 0.008289 | -1.13672 |          |
| Q8U181_sPQPPALHPTK_S1_30             | Q8U181 | IRF2BP1 | 26145  | interferon regulatory factor 2 binding protein 1 | S66       |             | 100                         | HYLVEKSSSFAPEFK | 0.138519 | 0.199548 | 0.150232 | 0.120139 | 0.109122 | 0.126274 | 0.118512 | 0.179433 | 0.660479 | 0.202641 | 0.018075 | -0.59841 |          |
| Q8U181_sPQPPALHPTK_S1_31             | Q8U181 | IRF2BP1 | 26145  | interferon regulatory factor 2 binding protein 1 | S66       |             | 100                         | HYLVEKSSSFAPEFK | 0.195303 | 0.143061 | 0.173411 | 0.130787 | 0.082466 | 0.108891 | 0.107382 | 0.170591 | 0.629467 | 0.919275 | 0.037377 | -0.66782 |          |
| Q8U181_sPQPPALHPTK_S1_32             | Q8U181 | IRF2BP1 | 26145  | interferon regulatory factor 2 binding protein 1 | S66       |             | 100                         | HYLVEKSSSFAPEFK | 0.125138 | 0.215128 | 0.204505 | 0.145128 | 0.104505 | 0.104519 | 0.104519 | 0.104519 | 0.104519 | 0.104519 | 0.104519 | 0.104519 | -0.65396 |
| Q8U181_sPQPPALHPTK_S1_33             | Q8U181 | IRF2BP1 | 26145  | interferon regulatory factor 2 binding protein 1 | S66       |             | 100                         | HYLVEKSSSFAPEFK | 0.185667 | 0.161316 | 0.160486 | 0.10649  | 0.10649  | 0.10649  | 0.10649  | 0.10649  | 0.10649  | 0.10649  | 0.10649  | 0.10649  | -0.60878 |
| Q8U181_sPQPPALHPTK_S1_34             | Q8U181 | IRF2BP1 | 26145  | interferon regulatory factor 2 binding protein 1 | S66       |             | 100                         | HYLVEKSSSFAPEFK | 0.238286 | 0.197964 | 0.284021 | 0.094349 | 0.090066 | 0.124785 | 0.103067 | 0.236757 | 0.435528 | 0.268746 | 0.01956  | -1.59893 |          |
| Q8U181_sPQPPALHPTK_S1_35             | Q8U181 | IRF2BP1 | 26145  | interferon regulatory factor 2 binding protein 1 | S66       |             | 100                         | HYLVEKSSSFAPEFK | 0.165727 | 0.179151 | 0.197875 | 0.126705 | 0.089478 | 0.142518 | 0.102444 | 0.206839 | 0.665379 | 0.489628 | 0.032599 | -0.59897 |          |
| Q8U181_sPQPPALHPTK_S1_36             | Q8U181 | IRF2BP1 | 26145  | interferon regulatory factor 2 binding protein 1 | S66       |             | 100                         | HYLVEKSSSFAPEFK | 0.175579 | 0.184627 | 0.186764 | 0.123729 | 0.097442 | 0.135644 | 0.118939 | 0.182323 | 0.65235  | 0.168948 | 0.005792 | -0.61628 |          |
| Q8U181_sPQPPALHPTK_S1_37             | Q8U181 | IRF2BP1 | 26145  | interferon regulatory factor 2 binding protein 1 | S66       |             | 100                         | HYLVEKSSSFAPEFK | 0.190407 | 0.21657  | 0.192458 | 0.126009 | 0.095096 | 0.11553  | 0.112145 | 0.199812 | 0.561254 | 0.923998 | 0.002085 | -0.83327 |          |
| Q8U181_sPQPPALHPTK_S1_38             | Q8U181 | IRF2BP1 | 26145  | interferon regulatory factor 2 binding protein 1 | S66       |             | 100                         | HYLVEKSSSFAPEFK | 0.29297  | 0.299788 | 0.208174 | 0.128362 | 0.082045 | 0.075664 | 0.095357 | 0.266977 | 0.357174 | 0.482015 | 0.007111 | -1.4853  |          |
| Q8U181_sPQPPALHPTK_S1_39             | Q8U181 | IRF2BP1 | 26145  | interferon regulatory factor 2 binding protein 1 | S66       |             | 100                         | HYLVEKSSSFAPEFK | 0.221696 | 0.237006 | 0.181957 | 0.154297 | 0.145221 | 0.151331 | 0.152083 | 0.213553 | 0.703728 | 0.051694 | 0.018994 | -0.50691 |          |
| Q8U181_sPQPPALHPTK_S1_               |        |         |        |                                                  |           |             |                             |                 |          |          |          |          |          |          |          |          |          |          |          |          |          |

|                               |         |          |        |                                                              |                 |                     |       |                  |          |          |          |          |          |          |          |          |          |          |          |          |
|-------------------------------|---------|----------|--------|--------------------------------------------------------------|-----------------|---------------------|-------|------------------|----------|----------|----------|----------|----------|----------|----------|----------|----------|----------|----------|----------|
| QBPFZ7_r5FSFK_Q3_1            | Q9BP27  | MAPKAP1  | 79109  | MAPK associated protein                                      | 5510            |                     | 94.11 | RKLNRRTRFSFQKKE  | 0.226345 | 0.193299 | 0.190554 | 0.141345 | 0.143866 | 0.159917 | 0.148376 | 0.203399 | 0.729481 | 0.407364 | 0.012954 | -4.5506  |
| QBPFZ7_r5FSFK_Q3_T2_1         | Q9BP27  | MAPKAP1  | 79109  | MAPK associated protein                                      | 5510            | 50,50               |       | QRLKNRRTRFSFQKKE | 0.219072 | 0.212527 | 0.155831 | 0.14382  | 0.131562 | 0.129834 | 0.135072 | 0.19581  | 0.689811 | 0.091732 | 0.041768 | -0.5373  |
| QBPFZ7_r5PSSIIHQK_Q3_1        | Q9BFQ6  | SENP7    | 57337  | SUMO specific peptidase 7                                    | T09             |                     | 98.98 | RKLGRRPSSSEITE   | 0.025456 | 0.199734 | 0.24445  | 0.118634 | 0.161803 | 0.173003 | 0.151147 | 0.233213 | 0.694805 | 0.972392 | 0.025996 | -6.2527  |
| QBPFZ7_r5PSSIIHQK_Q3_T1_T10_1 | Q9BRP8R | PYM1     | 84305  | PYM homolog 1, exon junction complex associated factor       | T112.T121       | 47.05;47.05         |       | BAEALSRLLDKQVLE  | 0.029413 | 0.239601 | 0.224434 | 0.122002 | 0.112829 | 0.126607 | 0.14015  | 0.218489 | 0.641448 | 0.675556 | 0.027565 | -0.8901  |
| QBPFZ7_r5PSSIIHQK_Q3_T5_1     | Q9BVC6  | UTP14A   | 10813  | UTP14A small subunit protein processome component            | S434.S437       | 50,50               |       | RRLRRKRSLEQLPSSG | 0.225651 | 0.247852 | 0.2952   | 0.122001 | 0.142879 | 0.176609 | 0.13756  | 0.258481 | 0.536253 | 0.671724 | 0.008198 | -6.4606  |
| QBPFZ7_r5PSSIIHQK_Q3_T5_1     | Q9BWC19 | KIFC1    | 3833   | kinesin family member C1                                     | S23             |                     | 98.98 | RKLRKRSLEQLPSSG  | 0.045986 | 0.39317  | 0.248971 | 0.098218 | 0.033376 | 0.065007 | 0.0692   | 0.356043 | 0.19436  | 0.33307  | 0.06997  | -2.332   |
| QBPFZ7_r5PSSIIHQK_Q3_T5_1     | Q9BWH6  | RPAP1    | 26015  | RNA polymerase II associated protein 1                       | S286.T268       | 49.47;49.47         |       | YALRLKAPQLPSSG   | 0.144008 | 0.174841 | 0.165186 | 0.076219 | 0.078249 | 0.075729 | 0.076586 | 0.161345 | 0.474673 | 0.018247 | 0.017079 | -1.0749  |
| QBPFZ7_r5PSSIIHQK_Q3_T5_1     | Q9BWT3  | PAPOIG   | 64895  | poly (A) polymerase gamma                                    | S708            |                     | 98.98 | RKRRKLPSKELPSSG  | 0.193833 | 0.147859 | 0.229138 | 0.135811 | 0.130547 | 0.16213  | 0.142829 | 0.21277  | 0.672844 | 0.954682 | 0.007978 | -5.7166  |
| QBPFZ7_r5PSSIIHQK_Q3_T5_1     | Q9BWT3  | PAPOIG   | 64895  | poly (A) polymerase gamma                                    | S708            |                     | 98.98 | RKRRKLPSKELPSSG  | 0.246612 | 0.222619 | 0.278636 | 0.111891 | 0.12558  | 0.150346 | 0.129272 | 0.249289 | 0.518564 | 0.649572 | 0.003703 | -0.94741 |
| QBPFZ7_r5PSSIIHQK_Q3_T5_1     | Q9BX84  | OSBP11   | 114881 | oxysterol binding protein like 11                            | S289            |                     | 83.2  | HQKGLSPQSTLIEWL  | 0.268814 | 0.293258 | 0.238824 | 0.146146 | 0.119829 | 0.157766 | 0.141247 | 0.266966 | 0.529083 | 0.673972 | 0.002885 | -0.91843 |
| QBPFZ7_r5PSSIIHQK_Q3_T5_1     | Q9BXC1  | KLF16    | 83855  | Kruppel like factor 16                                       | T225.S226       | 35.74;35.74         |       | RRPGRASRSPDLSL   | 0.232453 | 0.255797 | 0.261836 | 0.124996 | 0.159839 | 0.159485 | 0.148107 | 0.250029 | 0.592359 | 0.750824 | 0.002227 | -7.5546  |
| QBPFZ7_r5PSSIIHQK_Q3_T5_1     | Q9BZ23  | PANK2    | 80025  | pantothentic kinase 2                                        | S189            |                     | 92.59 | TRRDLGSLYSSVAV   | 0.22665  | 0.22301  | 0.204318 | 0.114812 | 0.131919 | 0.139344 | 0.128692 | 0.28006  | 0.590312 | 0.952473 | 0.000881 | -0.76045 |
| QBPFZ7_r5PSSIIHQK_Q3_T5_1     | Q9BZ23  | PANK2    | 80025  | pantothentic kinase 2                                        | S188            |                     | 83.49 | EVRLRRASASVAV    | 0.253971 | 0.228425 | 0.238735 | 0.133204 | 0.124098 | 0.137908 | 0.131737 | 0.240377 | 0.548041 | 0.459703 | 0.001212 | -0.86764 |
| QBPFZ7_r5PSSIIHQK_Q3_T5_1     | Q9BZF2  | OSBP17   | 55824  | oxysterol binding protein like 7                             | S272            |                     | 100   | RPLRGLSVYVNLRSY  | 0.185218 | 0.224514 | 0.14142  | 0.11101  | 0.085332 | 0.107812 | 0.101385 | 0.183717 | 0.551853 | 0.203587 | 0.031335 | -0.85764 |
| QBPFZ7_r5PSSIIHQK_Q3_T5_1     | Q9BZC2  | FAM129A  | 116496 | family with sequence similarity 129 member A                 | S602            |                     | 100   | ASPARASAILPQVL   | 0.184855 | 0.118841 | 0.234587 | 0.154706 | 0.125066 | 0.171332 | 0.139588 | 0.212761 | 0.749048 | 0.288959 | 0.028164 | -0.41687 |
| QBPFZ7_r5PSSIIHQK_Q3_T5_1     | Q9C073  | FAM117A  | 81558  | family with sequence similarity 117 member A                 | S178            |                     | 100   | GRKRRGSLPQGDRA   | 0.151171 | 0.154622 | 0.120559 | 0.092064 | 0.088229 | 0.094689 | 0.094994 | 0.142117 | 0.598058 | 0.753523 | 0.014078 | -0.74154 |
| QBPFZ7_r5PSSIIHQK_Q3_T5_1     | Q9C073  | FAM117A  | 81558  | family with sequence similarity 117 member A                 | S193.S199.S200  | 1100;48.09;48.09    |       | VKGLRALSPFPSPG   | 0.132579 | 0.129981 | 0.129909 | 0.081771 | 0.095329 | 0.116212 | 0.095641 | 0.127626 | 0.756025 | 0.272659 | 0.047024 | -0.40348 |
| QBPFZ7_r5PSSIIHQK_Q3_T5_1     | Q9C073  | FAM117A  | 81558  | family with sequence similarity 117 member A                 | S213            |                     | 100   | LSFCRLHSLQGLQNE  | 0.211681 | 0.209588 | 0.162488 | 0.080767 | 0.080164 | 0.090819 | 0.08317  | 0.94256  | 0.431259 | 0.0885   | 0.00253  | -1.21337 |
| QBPFZ7_r5PSSIIHQK_Q3_T5_1     | Q9C011  | MTMR12   | 54545  | myotubularin related protein 12                              | S564            |                     | 93.21 | FKHQQLSLPDLTQSK  | 0.234002 | 0.244652 | 0.194124 | 0.168072 | 0.110829 | 0.135511 | 0.138137 | 0.124564 | 0.611259 | 0.925093 | 0.018959 | -6.9907  |
| QBPFZ7_r5PSSIIHQK_Q3_T5_1     | Q9GZY6  | LAT2     | 7462   | linker for activation of T-cells family member 2             | S135            |                     | 89.5  | PEDDDANSYENLVIC  | 0.205473 | 0.231373 | 0.193766 | 0.161094 | 0.09U86  | 0.162673 | 0.156741 | 0.210204 | 0.745662 | 0.355344 | 0.012027 | -0.42341 |
| QBPFZ7_r5PSSIIHQK_Q3_T5_1     | Q9GZY6  | LAT2     | 7462   | linker for activation of T-cells family member 2             | Y136            |                     | 86.57 | PEDDDANSYENLVIC  | 0.222651 | 0.224891 | 0.204243 | 0.135902 | 0.145658 | 0.154291 | 0.145284 | 0.212624 | 0.668703 | 0.794693 | 0.010031 | -0.58056 |
| QBPFZ7_r5PSSIIHQK_Q3_T5_1     | Q9GZY6  | LAT2     | 7462   | linker for activation of T-cells family member 2             | S106            |                     | 100   | SKGSHGSEAYLIDP   | 0.21097  | 0.204335 | 0.210385 | 0.117343 | 0.07612  | 0.13705  | 0.120668 | 0.208563 | 0.578569 | 0.113201 | 0.000594 | -0.78944 |
| QBPFZ7_r5PSSIIHQK_Q3_T5_1     | Q9GZY6  | LAT2     | 7462   | linker for activation of T-cells family member 2             | Y136            |                     | 89.91 | SLREDQKSTFGRTSY  | 0.201641 | 0.200909 | 0.163211 | 0.105315 | 0.104562 | 0.127213 | 0.112333 | 0.188887 | 0.595658 | 0.507336 | 0.065556 | -0.74744 |
| QBPFZ7_r5PSSIIHQK_Q3_T5_1     | Q9H086  | KLC2     | 64837  | kinesin light chain 2                                        | S582            |                     | 93.33 | PRMKRASSLNFLNK   | 0.209523 | 0.209568 | 0.17823  | 0.160079 | 0.107687 | 0.109715 | 0.127826 | 0.199107 | 0.641998 | 0.458713 | 0.030781 | -0.78076 |
| QBPFZ7_r5PSSIIHQK_Q3_T5_1     | Q9H086  | KLC2     | 64837  | kinesin light chain 2                                        | S581.S582       | 50,50               |       | NPRMKRASSLNFLNK  | 0.243996 | 0.233164 | 0.230486 | 0.124649 | 0.17084  | 0.203565 | 0.166151 | 0.238602 | 0.704442 | 0.065152 | 0.040966 | -0.50545 |
| QBPFZ7_r5PSSIIHQK_Q3_T5_1     | Q9H086  | XRN2     | 22803  | 5' to 3' exonuclease 2                                       | S471            |                     | 82.3  | MRQKNGSISLIPNT   | 0.210721 | 0.186438 | 0.17974  | 0.150378 | 0.128164 | 0.154151 | 0.144231 | 0.19271  | 0.85119  | 0.317996 | 0.014198 | -0.41498 |
| QBPFZ7_r5PSSIIHQK_Q3_T5_1     | Q9H187  | IRF2BP4  | 64207  | interferon regulatory factor 2 binding protein like 4        | S69             |                     | 100   | GCYQDGRSPPFPV    | 0.212523 | 0.206694 | 0.212503 | 0.156173 | 0.115654 | 0.163905 | 0.145244 | 0.107907 | 0.688663 | 0.039611 | 0.045714 | -0.53813 |
| QBPFZ7_r5PSSIIHQK_Q3_T5_1     | Q9H2L5  | RASSFL   | 83937  | Ras association domain family member 4                       | S91             |                     | 86.14 | SNMRPSPRCLPEPS   | 0.212645 | 0.210774 | 0.198504 | 0.165037 | 0.14041  | 0.122175 | 0.142541 | 0.207307 | 0.687581 | 0.226195 | 0.007978 | -0.5404  |
| QBPFZ7_r5PSSIIHQK_Q3_T5_1     | Q9H2L5  | RASSFL   | 83937  | Ras association domain family member 4                       | S91.S98         | 45.87;45.87         |       | SNMRPSPRCLPEPS   | 0.241253 | 0.21501  | 0.21661  | 0.158773 | 0.144865 | 0.107433 | 0.137024 | 0.224291 | 0.610191 | 0.469716 | 0.007601 | -0.71095 |
| QBPFZ7_r5PSSIIHQK_Q3_T5_1     | Q9H4A3  | WNK1     | 65125  | WNK lysine deficient protein kinase 1                        | T245            |                     | 100   | MTSRRKSTLDDLHK   | 0.189607 | 0.216638 | 0.227215 | 0.127978 | 0.159829 | 0.156895 | 0.148234 | 0.211154 | 0.702021 | 0.903835 | 0.014136 | -0.51041 |
| QBPFZ7_r5PSSIIHQK_Q3_T5_1     | Q9H4L7  | SMARCAD1 | 56916  | SMW/SNF-related, matrix-associated actin-dependent regu      | S79             |                     | 99.95 | PDKERKASISYFQNG  | 0.24465  | 0.267632 | 0.276765 | 0.130337 | 0.117483 | 0.118462 | 0.122094 | 0.263016 | 0.464207 | 0.315062 | 0.000172 | -1.10716 |
| QBPFZ7_r5PSSIIHQK_Q3_T5_1     | Q9H4L7  | SMARCAD1 | 56916  | SMW/SNF-related, matrix-associated actin-dependent regu      | S79.S81         | 48.23;48.23         |       | PDKERKASISYFQNG  | 0.260745 | 0.264909 | 0.266736 | 0.135428 | 0.107347 | 0.13221  | 0.124955 | 0.26413  | 0.473233 | 0.07676  | 0.00104  | -1.07938 |
| QBPFZ7_r5PSSIIHQK_Q3_T5_1     | Q9H7D0  | DOCK5    | 80005  | dedicator of cytokinesis 5                                   | S1834           |                     | 89.55 | YEGSQNSTELAPPL   | 0.136677 | 0.148175 | 0.203731 | 0.072017 | 0.105052 | 0.132176 | 0.103861 | 0.172226 | 0.598526 | 0.945148 | 0.004704 | -0.74572 |
| QBPFZ7_r5PSSIIHQK_Q3_T5_1     | Q9H7D0  | DOCK5    | 80005  | dedicator of cytokinesis 5                                   | S1834.T1835     | 37.2;37.2           |       | YEGSQNSTELAPPL   | 0.184823 | 0.152322 | 0.134608 | 0.083098 | 0.08084  | 0.094647 | 0.080195 | 0.136174 | 0.632976 | 0.161437 | 0.003061 | -0.60928 |
| QBPFZ7_r5PSSIIHQK_Q3_T5_1     | Q9H7D0  | DOCK5    | 80005  | dedicator of cytokinesis 5                                   | S1830.S1834     | 46.16;46.16         |       | KSKYFEGSQNSTEL   | 0.165187 | 0.1121   | 0.19509  | 0.082031 | 0.106657 | 0.084046 | 0.090912 | 0.124248 | 0.638043 | 0.169692 | 0.040621 | -0.64828 |
| QBPFZ7_r5PSSIIHQK_Q3_T5_1     | Q9H7E2  | TDRD3    | 81500  | tdrd3 domain containing 3                                    | S421            |                     | 94.06 | LKKRKLRSQSDNVT   | 0.258926 | 0.241362 | 0.162789 | 0.146273 | 0.111717 | 0.140304 | 0.139515 | 0.220265 | 0.61493  | 0.123162 | 0.049338 | -0.71011 |
| QBPFZ7_r5PSSIIHQK_Q3_T5_1     | Q9H8G2  | CAAP1    | 79886  | caspace activity and apoptosis inhibitor 1                   | S89.T90         | 49.99;49.99         |       | ERRKRSTDSVSSVSG  | 0.240792 | 0.282665 | 0.269896 | 0.197801 | 0.163585 | 0.169473 | 0.176953 | 0.264451 | 0.669134 | 0.814168 | 0.005791 | -0.57963 |
| QBPFZ7_r5PSSIIHQK_Q3_T5_1     | Q9H8G2  | CAAP1    | 79886  | caspace activity and apoptosis inhibitor 1                   | S89             |                     | 81.29 | KRRRSTDSVSSVSG   | 0.229388 | 0.201625 | 0.27657  | 0.174535 | 0.156561 | 0.162356 | 0.164484 | 0.276414 | 0.61107  | 0.17919  | 0.006852 | -0.71059 |
| QBPFZ7_r5PSSIIHQK_Q3_T5_1     | Q9H8G2  | CAAP1    | 79886  | caspace activity and apoptosis inhibitor 1                   | S89.T90.S92.S93 | 24.7;24.7;24.7;24.7 |       | ERRKRSTDSVSSVSG  | 0.241613 | 0.269633 | 0.277388 | 0.212665 | 0.138807 | 0.155156 | 0.168876 | 0.262878 | 0.642412 | 0.381019 | 0.019502 | -0.63843 |
| QBPFZ7_r5PSSIIHQK_Q3_T5_1     | Q9HAC8  | UBT1D    | 80129  | ubiquitin domain containing 1                                | S164            |                     | 92.97 | TGKDVRLSALPDTV   | 0.246529 | 0.21243  | 0.18277  | 0.080313 | 0.093904 | 0.108724 | 0.098414 | 0.228154 | 0.424801 | 0.307024 | 0.007824 | -1.22296 |
| QBPFZ7_r5PSSIIHQK_Q3_T5_1     | Q9HB80  | SLC38A10 | 124565 | solute carrier family 38 member 10                           | S612            |                     | 100   | PRPQVALSEQNGKLA  | 0.155925 | 0.213809 | 0.149941 | 0.084186 | 0.075784 | 0.082131 | 0.080701 | 0.173225 | 0.465872 | 0.03037  | 0.043313 | -1.10199 |
| QBPFZ7_r5PSSIIHQK_Q3_T5_1     | Q9HC35  | EML4     | 72436  | EMAP like 4                                                  | S200            |                     | 96.44 | NKLKIPSTKFLPLA   | 0.151971 | 0.25391  | 0.249095 | 0.110773 | 0.07557  | 0.13879  | 0.103817 | 0.183777 | 0.246204 | 0.465503 | 0.044107 | -1.01041 |
| QBPFZ7_r5PSSIIHQK_Q3_T5_1     | Q9HC8K  | CHD8     | 57680  | chromatin domain helicase DNA binding protein 8              | S1978           |                     | 88.46 | GAPASLSRSGTPLL   | 0.215846 | 0.271805 | 0.158184 | 0.123677 | 0.084026 | 0.120831 | 0.109523 | 0.139278 | 0.50875  | 0.206005 | 0.039751 | -0.97497 |
| QBPFZ7_r5PSSIIHQK_Q3_T5_1     | Q9HNP6  | DC1A     | 55802  | decapping mPNA 1A                                            | S525            |                     | 94.06 | KSRASPSPLTITGTP  | 0.195602 | 0.260939 | 0.185415 | 0.136357 | 0.089429 | 0.174729 | 0.124398 | 0.215825 | 0.581341 | 0.72155  | 0.038886 | -0.78254 |
| QBPFZ7_r5PSSIIHQK_Q3_T5_1     | Q9HNS0  | TRIP3    | 23303  | kinesin family member 13B                                    | S410            |                     | 100   | SNGKRWSEQQVQYQ   | 0.203036 | 0.219627 | 0.196219 | 0.119957 | 0.034361 | 0.077408 | 0.096932 | 0.137501 | 0.54001  | 0.502369 | 0.02096  | -0.88948 |
| QBPFZ7_r5PSSIIHQK_Q3_T5_1     | Q9HR12  | PDUM7    | 9260   | PDZ and LIM domain 7                                         | S550.S526       | 50,50               |       | FTPLQRTSIVQAAAG  | 0.256852 | 0.266517 | 0.200603 | 0.131047 | 0.089036 | 0.123672 | 0.117585 | 0.241324 | 0.487249 | 0.383115 | 0.00564  | -1.03727 |
| QBPFZ7_r5PSSIIHQK_Q3_T5_1     | Q9HR19  | ACSS2    | 55902  | acyl-CoA synthetase short-chain family member 2              | S30             |                     | 91.2  | GGRRSSPSPPEVSR   | 0.180359 | 0.183337 | 0.174109 | 0.128135 | 0.110011 | 0.143734 | 0.127923 | 0.179968 | 0.10072  | 0.144449 | 0.006802 | -0.49396 |
| QBPFZ7_r5PSSIIHQK_Q3_T5_1     | Q9HR48  | EIF4EF1  | 56478  | eukaryotic translation initiation factor 4E nuclear import f | S577.Y580       | 50,50               |       | VEQTAAADYLRRLP   | 0.177434 |          |          |          |          |          |          |          |          |          |          |          |

|                                              |         |           |        |                                                              |                |                   |                                 |                                                 |                                                                |          |          |          |          |          |          |          |          |          |          |          |          |
|----------------------------------------------|---------|-----------|--------|--------------------------------------------------------------|----------------|-------------------|---------------------------------|-------------------------------------------------|----------------------------------------------------------------|----------|----------|----------|----------|----------|----------|----------|----------|----------|----------|----------|----------|
| QBUIF2_uISGTStEKNPMSMDTANTSFPK_S3_S8_1       | QBUIF2  | RASAL2    | 9462   | RAS protein activator like 2                                 | S18.S23        | 37.68;37.68       | SPRRRSISGTSTSEK.SISGTSTSEKPNMSD |                                                 |                                                                | 0.220401 | 0.25019  | 0.265719 | 0.125718 | 0.129523 | 0.151959 | 0.135733 | 0.245437 | 0.553028 | 0.540797 | 0.002162 | -0.85458 |
| QBUIU6_amsTTSISSPQPGK_S3_1                   | QBUIU6  | DBNL      | 28988  | drebrin like                                                 | S269           |                   | 92.94                           | KQKERAMSTTSISSP                                 |                                                                | 0.255895 | 0.259609 | 0.180498 | 0.171606 | 0.082121 | 0.124294 | 0.125703 | 0.232001 | 0.541823 | 0.98725  | 0.044222 | -0.88411 |
| QBUIU6_amsTTSISSPQPGK_S3_T4_T5_1             | QBUIU6  | DBNL      | 28988  | drebrin like                                                 | S269           | T270.T271         | 32.75;32.75;32.75               | KQKERAMSTTSISSP.QKERAMSTTSISSPP.KERAMSTTSISSPPQ |                                                                | 0.280407 | 0.246683 | 0.203303 | 0.166798 | 0.127564 | 0.141345 | 0.145236 | 0.243464 | 0.596538 | 0.419195 | 0.017345 | -0.74531 |
| QBUIU6_qLQPEHFGR_T3_1                        | QBUIU6  | DBNL      | 28988  | drebrin like                                                 | T291           |                   |                                 | 99.97                                           | PFLQQLQQLQPEHFHG                                               | 0.308755 | 0.22948  | 0.261064 | 0.143036 | 0.157429 | 0.187365 | 0.16261  | 0.266443 | 0.610322 | 0.486077 | 0.017243 | -0.71236 |
| QBUIK61_kNTQIQLDLSPPDVQNSILEDKYLDSSEER_S10_1 | QBUIK61 | TASOR     | 23272  | transcription activation suppressor                          | S1552          |                   |                                 | 99.97                                           | TQIQLDLSPPDVQNSL                                               | 0.202855 | 0.188865 | 0.210728 | 0.125667 | 0.155601 | 0.155298 | 0.145855 | 0.200809 | 0.726338 | 0.571921 | 0.010052 | -0.46129 |
| QBUIK61_kNTQIQLDLSPPDVQNSILEDKYLDSSEER_S10_1 | QBUIK61 | TASOR     | 23272  | transcription activation suppressor                          | S1552          |                   |                                 | 87.11                                           | TQIQLDLSPPDVQNSL                                               | 0.156788 | 0.204863 | 0.191551 | 0.120624 | 0.124441 | 0.155862 | 0.133646 | 0.184411 | 0.724717 | 0.755019 | 0.049097 | -0.46451 |
| QBUIK61_nMRGAIISGK_S3_1                      | QBUIK61 | TASOR     | 23272  | transcription activation suppressor                          | S658           |                   |                                 | 100                                             | KFKKRWNSRREAIIIS                                               | 0.175901 | 0.167389 | 0.211091 | 0.112137 | 0.150176 | 0.120047 | 0.130453 | 0.18476  | 0.706068 | 0.70323  | 0.030967 | -0.50212 |
| QBUIK2_qESFGPKAPRLrLcEPVnMeEK_S13_1          | QBUIK2  | CD42EP3   | 10602  | CD42 effector protein 3                                      | S144           |                   |                                 | 99.5                                            | PAKLFPLRcESFPWEE                                               | 0.179227 | 0.16336  | 0.16263  | 0.130941 | 0.082418 | 0.085735 | 0.099698 | 0.168406 | 0.592011 | 0.213797 | 0.014274 | -0.75631 |
| QBUIK3_vLrHySG_S5_1                          | QBUIK3  | PARP4     | 143    | poly(ADP-ribose) polymerase family member 4                  | S1722          |                   |                                 | 99.98                                           | LHRVLrHySQ                                                     | 0.157925 | 0.195976 | 0.189251 | 0.107047 | 0.060017 | 0.084121 | 0.083728 | 0.181051 | 0.462458 | 0.854312 | 0.005599 | -1.11261 |
| QBUIK3_nEAPPVQVFNNSH_S3_1                    | QBUIK3  | CASPRAP2  | 9994   | casprase 8 associated protein 2                              | S875           |                   |                                 | 100                                             | AKVLENSPFPQVFNNS                                               | 0.179134 | 0.162878 | 0.177325 | 0.069834 | 0.093235 | 0.070185 | 0.077781 | 0.173112 | 0.449311 | 0.609147 | 0.000515 | -1.15421 |
| QBUIK3_kisvSATK_S3_1                         | QBUIK3  | ACIN1     | 22985  | Apoptotic chromatin condensation inducer 1                   | S825           |                   |                                 | 99.82                                           | KSFKRKISVVSATKG                                                | 0.296746 | 0.322836 | 0.225392 | 0.153676 | 0.090595 | 0.118897 | 0.121056 | 0.181658 | 0.429797 | 0.563544 | 0.009494 | -1.21827 |
| QBUIK3_kpISITTESK_S3_1                       | QBUIK3  | ACIN1     | 22985  | Apoptotic chromatin condensation inducer 1                   | S863           |                   |                                 | 100                                             | ATTQKPKISITTES                                                 | 0.226556 | 0.221594 | 0.200476 | 0.147057 | 0.160546 | 0.153117 | 0.151474 | 0.216209 | 0.70059  | 0.68507  | 0.002786 | -0.51336 |
| QBUIK3_rAsHTLLPSHR_S3_1                      | QBUIK3  | ACIN1     | 22985  | Apoptotic chromatin condensation inducer 1                   | S561           |                   |                                 | 91.37                                           | KQEGRAASHTLLPSH                                                | 0.263402 | 0.260698 | 0.252423 | 0.147287 | 0.171285 | 0.144226 | 0.154289 | 0.258841 | 0.596077 | 0.260116 | 0.003386 | -0.74643 |
| QBUIK3_rAsHTLLPSHR_S3_T5_1                   | QBUIK3  | ACIN1     | 22985  | Apoptotic chromatin condensation inducer 1                   | S561.T563      | 50.50             |                                 | 91.37                                           | KQEGRAASHTLLPSH.EGRRASHTLLPSHRL                                | 0.21867  | 0.244759 | 0.191461 | 0.123867 | 0.141699 | 0.139907 | 0.135158 | 0.218297 | 0.619146 | 0.239049 | 0.00713  | -0.69165 |
| QBUIH0_rPSVITLWNNSAPANR_S3_T4_1              | QBUIH0  | KIDINS220 | 57498  | kinase D-interacting substrate 220kDa                        | S1681.T1682    | 48.5;48.5         |                                 |                                                 | YNLNRPSTVTVLNNN.NLNRPTSTVTVLNNNS                               | 0.215549 | 0.282344 | 0.227007 | 0.185818 | 0.145958 | 0.156268 | 0.162685 | 0.241633 | 0.673272 | 0.502302 | 0.029576 | -0.57074 |
| QBUIW0_rMMPNDEDEEEDVPVik_T5_1                | QBUIW0  | TPX2      | 23974  | TPX2, microtubule nucleation factor                          | T499           |                   |                                 | 100                                             | RNRIRMPNDEDEEED                                                | 0.205071 | 0.235716 | 0.240798 | 0.159788 | 0.165973 | 0.187262 | 0.171008 | 0.230195 | 0.742882 | 0.568559 | 0.019229 | -0.42879 |
| QBUNNS_kpMMPENAEENEGDALLQTAEPSSR_S2_1        | QBUNNS  | FAF1      | 11124  | Fas associated factor 1                                      | S320           |                   |                                 | 100                                             | ASSALRKSFPMDENR                                                | 0.212849 | 0.264093 | 0.22305  | 0.119011 | 0.136357 | 0.161558 | 0.138975 | 0.23323  | 0.595614 | 0.767016 | 0.009099 | -0.74755 |
| QBUPNA_kRPAiLSTAPEK_S5_1                     | QBUPNA  | CEP131    | 22994  | centrosomal protein 131                                      | S114           |                   |                                 | 99.88                                           | SDGKKRPAiLSTAPEK                                               | 0.164356 | 0.1995   | 0.230476 | 0.139041 | 0.1439   | 0.126304 | 0.136415 | 0.198111 | 0.688579 | 0.140326 | 0.357506 | -0.53831 |
| QBUPUS_nDINAEVALLTNERGLDYGVEPMDSDGGGpGpG     | QBUPUS  | USP24     | 23358  | ubiquitin specific peptidase 24                              | S63            |                   |                                 | 100                                             | MDSGGGpGpGpGpGpG                                               | 0.220449 | 0.210762 | 0.225318 | 0.132952 | 0.16399  | 0.176966 | 0.157969 | 0.188843 | 0.721839 | 0.19385  | 0.011419 | -0.47025 |
| QBUPW6_nQoQAKESSPPREAEPPPPPTDScAK_S3_1       | QBUPW6  | SATB2     | 23314  | SATB2 homeobox 2                                             | S587           |                   |                                 | 85.69                                           | QVLRHQQAKESSPPREAE                                             | 0.148888 | 0.155684 | 0.144236 | 0.115039 | 0.112062 | 0.096601 | 0.107901 | 0.149602 | 0.721248 | 0.505528 | 0.00323  | -0.47143 |
| QBUCQ2_rnLPAmdNSR_T3_1                       | QBUCQ2  | GAB2      | 9846   | GRB2 associated binding protein 2                            | T391           |                   |                                 | 100                                             | ATIPIRNLTPAmdNSR                                               | 0.213638 | 0.250813 | 0.232034 | 0.185142 | 0.153004 | 0.182309 | 0.173485 | 0.232162 | 0.747259 | 0.956356 | 0.016823 | -0.42032 |
| QBY2D5_dAlGDGLQVPVSPSTSSR_S12_S14_1          | QBY2D5  | AKAP2     | 11217  | A-kinase anchor protein 2                                    | S152.S154      | 44.33;44.33       |                                 |                                                 | DSLQVPPVSPSTSSR.LQVPPVSPSTSSRC                                 | 0.180554 | 0.218152 | 0.194345 | 0.123333 | 0.112075 | 0.128001 | 0.121137 | 0.197684 | 0.612779 | 0.312649 | 0.003056 | -0.70556 |
| QBY217_kSHINSLSD_S3_1                        | QBY217  | PIKFYVE   | 200576 | phosphoinositide kinase, FYVE-type zinc finger containing    | S307           |                   |                                 | 99.96                                           | PARNRSASINSLSD                                                 | 0.221089 | 0.19899  | 0.175769 | 0.143732 | 0.102467 | 0.132967 | 0.126389 | 0.198616 | 0.636346 | 0.942951 | 0.015955 | -0.65212 |
| QBY216_kSHINQFVDR_S3_1                       | QBY216  | FRMD48    | 23150  | FERM domain containing 48                                    | S628           |                   |                                 | 91.79                                           | RIHFRRSINQFVDR                                                 | 0.223012 | 0.176394 | 0.195117 | 0.129583 | 0.117093 | 0.117905 | 0.121527 | 0.198814 | 0.613233 | 0.163037 | 0.050604 | -0.70549 |
| QBY2US_yHVSYHQEYNDGRKFRPR_T16_1              | QBY2US  | MAP3K2    | 10746  | mitogen-activated protein kinase kinase kinase 2             | T283           |                   |                                 | 96.41                                           | EYNDGRKFRPR                                                    | 0.189648 | 0.207034 | 0.18883  | 0.130272 | 0.15971  | 0.134476 | 0.141486 | 0.188504 | 0.750571 | 0.818598 | 0.030723 | -0.41394 |
| QBY2W1_qAYPR_S4_1                            | QBY2W1  | THRAP3    | 9967   | thyroid hormone receptor associated protein 3                | S119           |                   |                                 | 94.54                                           | QNTKQAYPR                                                      | 0.209052 | 0.176851 | 0.203462 | 0.14318  | 0.134802 | 0.146429 | 0.14147  | 0.196455 | 0.720116 | 0.21675  | 0.006399 | -0.4737  |
| QBY2X3_kIkeEPLSEEPcTSTAIASPEK_S8_1           | QBY2X3  | NOP58     | 51602  | NOP58 ribonucleoprotein                                      | S502           |                   |                                 | 100                                             | HKEEPLSEEPcTSTAIASPEK                                          | 0.158513 | 0.211144 | 0.170097 | 0.118223 | 0.127617 | 0.131093 | 0.125644 | 0.179918 | 0.698341 | 0.109564 | 0.298082 | -0.518   |
| QBY2X3_kIkeEPLSEEPcTSTAIASPEK_SR_1           | QBY2X3  | NOP58     | 51602  | NOP58 ribonucleoprotein                                      | S502           |                   |                                 | 100                                             | HKEEPLSEEPcTSTAIASPEK                                          | 0.147221 | 0.187738 | 0.161173 | 0.120437 | 0.126365 | 0.116782 | 0.121195 | 0.165377 | 0.732838 | 0.104631 | 0.02237  | -0.44843 |
| QBY2X3_kIkeEPLSEEPcTSTAIASPEK_S9_1           | QBY2X3  | NOP58     | 51602  | NOP58 ribonucleoprotein                                      | S502           |                   |                                 | 100                                             | HKEEPLSEEPcTSTAIASPEK                                          | 0.154421 | 0.167258 | 0.154499 | 0.103323 | 0.141846 | 0.10465  | 0.116606 | 0.158726 | 0.734638 | 0.204929 | 0.034168 | -0.44489 |
| QBY383_kMILDQLMGTSRSDGTTTR_S10_1             | QBY383  | LUC7L2    | 51631  | LUC7 like 2, pre-mRNA splicing factor                        | S18            |                   |                                 | 93.16                                           | LDLQMGTSRSDGTTTR                                               | 0.182582 | 0.239111 | 0.20015  | 0.148277 | 0.121051 | 0.153536 | 0.140955 | 0.207281 | 0.680019 | 0.5329   | 0.027255 | -0.55635 |
| QBY450_kPVDQSTSRSESEIVK_S6_T8_S9_1           | QBY450  | HBS1L     | 10767  | HBS1 like 2, pre-mRNA splicing factor                        | S149.T151.S152 | 32.28;32.28;32.28 |                                 |                                                 | AKGKPKVDQSTSRSES.GKPVDSQTSRSESEI.KPVDSQTSRSESEIV               | 0.206308 | 0.202862 | 0.154944 | 0.079645 | 0.097444 | 0.11193  | 0.09634  | 0.188038 | 0.512341 | 0.481162 | 0.008524 | -0.96482 |
| QBY4H2_rHNSASVNSLR_S4_1                      | QBY4H2  | IRS2      | 8660   | insulin like translational substrate 2                       | S1174          |                   |                                 | 91.64                                           | HNRKPNNSASVNSLR                                                | 0.174921 | 0.180061 | 0.206455 | 0.11555  | 0.089499 | 0.12613  | 0.110393 | 0.187126 | 0.58994  | 0.892948 | 0.006319 | -0.76136 |
| QBY572_nQMPSTGTSPGPR_S5_1                    | QBY572  | RIPK3     | 11035  | receptor interacting serine/threonine kinase 3               | S410           |                   |                                 | 89.59                                           | TFRNQMPSTGTSPGPR                                               | 0.173021 | 0.142074 | 0.15815  | 0.107015 | 0.104437 | 0.13107  | 0.114174 | 0.187748 | 0.72377  | 0.947763 | 0.024078 | -0.4664  |
| QBY572_rHENQHRNDmvSEWLK_S7_1                 | QBY572  | RIPK3     | 11035  | receptor interacting serine/threonine kinase 3               | S339           |                   |                                 | 89.59                                           | RTENQHRNDmvSEWLK                                               | 0.213006 | 0.201483 | 0.17411  | 0.15243  | 0.106595 | 0.101284 | 0.120103 | 0.1962   | 0.612146 | 0.670851 | 0.018765 | -0.70805 |
| QBY580_rRQPMSSETMPLYLcLc_S5_1                | QBY580  | CTDP1     | 9150   | CTD phosphatase subunit 1                                    | S839           |                   |                                 | 98.92                                           | SRRRKQPMSSETMPLYLcLc                                           | 0.247971 | 0.207386 | 0.210486 | 0.183193 | 0.147159 | 0.128466 | 0.152939 | 0.221948 | 0.689077 | 0.794812 | 0.028957 | -0.53726 |
| QBY608_rASATITLGSNSR_S13_S14_1               | QBY608  | LNRFP2    | 9209   | LNR binding FliJ interacting protein 2                       | S323.S324      | 50.50             |                                 |                                                 | TFPLGNSRRRGSGD.TPLGNSRRRGSGDT                                  | 0.255748 | 0.1945   | 0.257196 | 0.169    | 0.181752 | 0.138489 | 0.16308  | 0.235814 | 0.691563 | 0.55888  | 0.040328 | -0.53207 |
| QBY613_kLAPKPEKPLPASP_S5_1                   | QBY613  | FHOD1     | 29109  | formin homology 2 domain containing 1                        | S510           |                   |                                 | 100                                             | VLLRQSLAPKPEK                                                  | 0.220367 | 0.230711 | 0.193566 | 0.174715 | 0.140044 | 0.105103 | 0.139954 | 0.214881 | 0.651307 | 0.465505 | 0.030906 | -0.61859 |
| QBY66D_rHQHHLQLQVSHHEPESQLR_S10_1            | QBY66D  | ARFGF1    | 10565  | ADP ribosylation factor guanine nucleotide exchange factor 2 | S234           |                   |                                 | 97.81                                           | QHHLQLQVSHHEPESQLR                                             | 0.190511 | 0.216489 | 0.231284 | 0.174888 | 0.091806 | 0.103882 | 0.123525 | 0.212761 | 0.580582 | 0.349045 | 0.035243 | -0.78443 |
| QBY669_rSVSNVNASVPIAGSK_S1_1                 | QBY669  | DYNC1L1   | 51143  | dynein cytoplasmic 1 light intermediate chain 1              | S412           |                   |                                 | 99.6                                            | SRPTNRVSNVNASVPIAGSK                                           | 0.28554  | 0.296511 | 0.27521  | 0.122052 | 0.102264 | 0.152812 | 0.152709 | 0.319087 | 0.393965 | 0.614844 | 0.006308 | -1.34386 |
| QBY669_rSVSNVNASVPIAGSK_S1_S4_1              | QBY669  | DYNC1L1   | 51143  | dynein cytoplasmic 1 light intermediate chain 1              | S412.S414.S415 | 33.33;33.33;33.33 |                                 |                                                 | SRPTNRVSNVNASVPIAGSK.RTPNRSVSNVNASVPIAGSK.RTPNRSVSNVNASVPIAGSK | 0.225276 | 0.235713 | 0.179203 | 0.114217 | 0.082508 | 0.122009 | 0.106245 | 0.213397 | 0.497872 | 0.652432 | 0.007149 | -1.00615 |
| QBY613_kLAPKPEKPLPASP_S5_1                   | QBY613  | EPN1      | 29924  | epsin 1                                                      | T470           |                   |                                 | 99.99                                           | PTPPRKTPPEFLGP                                                 | 0.22758  | 0.225871 | 0.240576 | 0.090264 | 0.121314 | 0.151146 | 0.120908 | 0.231342 | 0.522638 | 0.130473 | 0.00371  | -0.93612 |
| RAGMX8_rVRGSGDINAVGEGPQDEENTLNVANTSNSGL      | RAGMX8  | SLC30A1   | 7779   | solute carrier family 30 member 1                            | S167.T168      | 44.52;44.52       |                                 |                                                 | PKGPRVKSrVRGSGD.KGPRVKSrVRGSGDI                                | 0.1743   | 0.1851   | 0.165012 | 0.077948 | 0.110352 | 0.125984 | 0.104761 | 0.174804 | 0.599307 | 0.288228 | 0.010177 | -0.73863 |
| RAGMX8_rVRGSGDINAVGEGPQDEENTLNVANTSNSGL      | RAGMX8  | RANBP10   |        |                                                              |                |                   |                                 |                                                 |                                                                |          |          |          |          |          |          |          |          |          |          |          |          |

2. Phosphosites downregulated in shTBK1#1 cells (887 genes) (P<0.05, log2FC>0.4)

| Unique_ID_REAL                                   | Protein_ID | Gene    | Gene_ID | Description                                   | Prot_Loc       | PTM_Score         | Flank_Seq | shControl-shControl | shControl-shControl | shTBK1#1 | shTBK1#1 | shTBK1#1 | shControl_F538 | F test   | P value  | LogFC    |           |          |
|--------------------------------------------------|------------|---------|---------|-----------------------------------------------|----------------|-------------------|-----------|---------------------|---------------------|----------|----------|----------|----------------|----------|----------|----------|-----------|----------|
| A0A087WTT2_1s2TDDGVDLQFK_S2_S3_T4_1              | A0A087WTT2 | TMEM230 | 29058   | transmembrane protein 230                     | S23.S24.T25    | 32.81;32.81;32.81 | 0.178482  | 0.092467            | 0.144106            | 0.097201 | 0.111258 | 0.200896 | 0.55381        | 7.19056  | 0.031045 | -0.85254 |           |          |
| A0A087WTT2_1s2TDDGVDLQFK_S3_T4_1                 | A0A087WTT2 | TMEM230 | 29058   | transmembrane protein 230                     | S24.T25        | 48.03;48.03       | 0.187169  | 0.2134              | 0.1536              | 0.116655 | 0.147685 | 0.104386 | 0.122909       | 0.184723 | 0.665367 | 0.713224 | 0.045699  | -0.58778 |
| A0A087WFX8_rRfCGDYTGQK_S3_1                      | A0A087WFX8 | ZCHC17  | 51538   | zinc finger CCHC-type containing 17           | S136           |                   | 0.363187  | 0.296866            | 0.302326            | 0.111955 | 0.093516 | 0.102804 | 0.102758       | 0.326763 | 0.314474 | 0.139738 | 0.000372  | -1.66899 |
| A0A087WY29_kLEVAQScDcEVEVLPLGLEIHPR_S3_1         | A0A087WY29 | SETDB2  | 83852   | SET domain bifurcated 2                       | S437           |                   | 0.215221  | 0.242931            | 0.190241            | 0.113926 | 0.113181 | 0.130418 | 0.119175       | 0.216131 | 0.551403 | 0.240644 | 0.00394   | -0.85882 |
| A0A087X0H9_sYLLPEQSPSSGLKVEFFHQEK_S12_1          | A0A087X0H9 | RBM26   | 64062   | RNA binding motif protein 26                  | S92            |                   | 0.126262  | 0.214194            | 0.201588            | 0.093632 | 0.118567 | 0.08432  | 0.09884        | 0.179781 | 0.554978 | 0.202212 | 0.048129  | -0.86308 |
| A0A087X188_slSPVPRV_S1_1                         | A0A087X188 | BIN2    | 51411   | bridging integrator 2                         | S291           |                   | 0.165555  | 0.236919            | 0.255691            | 0.059281 | 0.077063 | 0.089542 | 0.075295       | 0.255355 | 0.294865 | 0.818539 | 0.00195   | -1.76188 |
| A0A087X1R1_sTSFGVNPANSIK_S1_1                    | A0A087X1R1 | SMTN    | 5875    | 52S smoothelin                                | S875           |                   | 0.397225  | 0.278898            | 0.327075            | 0.099788 | 0.118007 | 0.105298 | 0.107698       | 0.333303 | 0.320663 | 0.048129 | 0.20108   | -1.63459 |
| A0A087X1R1_sTSFGVNPANSIK_S1_T2_S3_1              | A0A087X1R1 | SMTN    | 5875    | 52S smoothelin                                | S875.T876.S877 | 33.33;33.33;33.33 | 0.25673   | 0.241344            | 0.217137            | 0.046321 | 0.077759 | 0.053834 | 0.059305       | 0.223137 | 0.265778 | 0.230255 | 0.00422   | -1.91171 |
| A0A087X1R1_sTSFGVNPANSIK_S1_T2_S3_1              | A0A087X1R1 | SMTN    | 5877    | 52S smoothelin                                | S877           |                   | 0.261246  | 0.256548            | 0.275353            | 0.085307 | 0.128494 | 0.083796 | 0.099199       | 0.247649 | 0.400562 | 0.74822  | 0.001315  | -1.3199  |
| A0A087X2D8_dGGSGVVGASVFYK_S4_1                   | A0A087X2D8 | SPAG9   | 5696    | 9043 sperm associated antigen 9               | S584           |                   | 0.187204  | 0.163691            | 0.20999             | 0.122271 | 0.105381 | 0.119413 | 0.115688       | 0.186962 | 0.618782 | 0.26461  | 0.007667  | -0.6925  |
| A0A087X2D8_kRSTLSQLPGDK_S3_1                     | A0A087X2D8 | SPAG9   | 5696    | 9043 sperm associated antigen 9               | S584           |                   | 0.205292  | 0.198958            | 0.178189            | 0.115518 | 0.114132 | 0.087388 | 0.10568        | 0.194146 | 0.544329 | 0.888589 | 0.001968  | -0.87745 |
| A0A087X2D8_sASQSLDKLDLQELK_S5_S6_1               | A0A087X2D8 | SPAG9   | 5696    | 9043 sperm associated antigen 9               | S584           |                   | 0.205292  | 0.198958            | 0.178189            | 0.115518 | 0.114132 | 0.087388 | 0.10568        | 0.194146 | 0.544329 | 0.888589 | 0.001968  | -0.87745 |
| A0A096LP25_tQQQVYNPSEGSTWNPFPDDNFsk_T1_S2_1      | A0A096LP25 | AAK1    | 22848   | AP2 associated kinase 1                       | T29.S30        | 49.81;49.81       | 0.21598   | 0.18767             | 0.220358            | 0.15865  | 0.129983 | 0.101697 | 0.13011        | 0.208003 | 0.625523 | 0.559359 | 0.015852  | -0.67687 |
| A0A096LPC5_gLrFDEEDEDLFSSQSANLk_S4_1             | A0A096LPC5 | WASHC2C | 253725  | WASH complex subunit 2C                       | S539           |                   | 0.255856  | 0.335359            | 0.220697            | 0.074542 | 0.150298 | 0.069602 | 0.079677       | 0.270637 | 0.361987 | 0.479499 | 0.015756  | -1.46599 |
| A0A096LPC5_gLIAQWADGAlsPNGHRPQLR_S12_1           | A0A096LPC5 | WASHC2C | 253725  | WASH complex subunit 2C                       | S539           |                   | 0.178273  | 0.173479            | 0.174473            | 0.139329 | 0.142614 | 0.110845 | 0.130929       | 0.175558 | 0.745789 | 0.049585 | 0.044408  | -0.42316 |
| A0A096LPC5_kTlFEEDKEDDLFAIAK_S3_1                | A0A096LPC5 | WASHC2C | 253725  | WASH complex subunit 2C                       | S539           |                   | 0.179295  | 0.18603             | 0.173665            | 0.116559 | 0.14661  | 0.120179 | 0.127793       | 0.17754  | 0.719798 | 0.335588 | 0.006862  | -0.47434 |
| A0A096LPC5_kTlFEEDKEDDLFAIAK_T2_S3_1             | A0A096LPC5 | WASHC2C | 253725  | WASH complex subunit 2C                       | S563           |                   | 0.188544  | 0.21789             | 0.191691            | 0.128517 | 0.135065 | 0.099754 | 0.121112       | 0.199375 | 0.607458 | 0.847725 | 0.005407  | -0.71914 |
| A0A096LPC5_kvQAGADIFGDEEGDLFK_S4_1               | A0A096LPC5 | WASHC2C | 253725  | WASH complex subunit 2C                       | S478           |                   | 0.166114  | 0.204043            | 0.140345            | 0.093183 | 0.125855 | 0.074334 | 0.097791       | 0.170168 | 0.574672 | 0.796546 | 0.38595   | -0.79919 |
| A0A096LPC5_kvQAGADIFGDEEGDLFK_S4_T5_1            | A0A096LPC5 | WASHC2C | 253725  | WASH complex subunit 2C                       | S478           |                   | 0.198902  | 0.222969            | 0.212624            | 0.1337   | 0.149824 | 0.116232 | 0.133252       | 0.194958 | 0.621226 | 0.765367 | 0.008249  | -0.68819 |
| A0A096LPC5_kvQAGADIFGDEEGDLFK_S4_T5_1            | A0A096LPC5 | WASHC2C | 253725  | WASH complex subunit 2C                       | S478.T479      | 50.50             | 0.198902  | 0.222969            | 0.212624            | 0.1337   | 0.149824 | 0.116232 | 0.133252       | 0.194958 | 0.621226 | 0.765367 | 0.008249  | -0.68819 |
| A0A096LPC5_kvQAGADIFGDEEGDLFK_S4_T5_1            | A0A096LPC5 | WASHC2C | 253725  | WASH complex subunit 2C                       | S478.T479      | 50.50             | 0.238333  | 0.187364            | 0.229894            | 0.179025 | 0.130656 | 0.166265 | 0.158649       | 0.18183  | 0.725981 | 0.914217 | 0.04844   | -0.462   |
| A0A096LPC5_rSPRTFADELAAR_S2_1                    | A0A096LPC5 | WASHC2C | 253725  | WASH complex subunit 2C                       | S284           |                   | 0.8273    | 0.18609             | 0.175496            | 0.094131 | 0.134038 | 0.124679 | 0.133339       | 0.21871  | 0.711484 | 0.606868 | 0.00346   | -0.4911  |
| A0A096LPC5_rSPRTFADELAAR_T5_S6_1                 | A0A096LPC5 | WASHC2C | 253725  | WASH complex subunit 2C                       | T287.S288      | 49.97;49.97       | 0.211989  | 0.163343            | 0.185491            | 0.13501  | 0.145781 | 0.141712 | 0.140834       | 0.189441 | 0.753362 | 0.094908 | 0.032899  | -0.40859 |
| A0A096LPC5_rTPSDDEEDNLFAPPK_T2_S4_1              | A0A096LPC5 | WASHC2C | 253725  | WASH complex subunit 2C                       | T331.S333      | 50.50             | 0.148231  | 0.175417            | 0.208691            | 0.091862 | 0.115984 | 0.084313 | 0.097386       | 0.177466 | 0.548821 | 0.459878 | 0.31588   | -0.86559 |
| A0A096LPC5_rSPRTFADELAAR_S1_1                    | A0A096LPC5 | WASHC2C | 253725  | WASH complex subunit 2C                       | S284           |                   | 0.193356  | 0.174231            | 0.190867            | 0.15279  | 0.139137 | 0.124316 | 0.138748       | 0.186151 | 0.745349 | 0.695471 | 0.009617  | -0.42401 |
| A0A096LPC5_rTGVFDLEELLFSHK_S1_1                  | A0A096LPC5 | WASHC2C | 253725  | WASH complex subunit 2C                       | S836           |                   | 0.219783  | 0.218866            | 0.206769            | 0.116043 | 0.110866 | 0.079194 | 0.102034       | 0.210416 | 0.476551 | 0.341031 | 0.00895   | -1.0693  |
| A0A096LPC5_rTGLSDFEEDKEMEDQNIQAQPK_S6_1          | A0A096LPC5 | WASHC2C | 253725  | WASH complex subunit 2C                       | S862           |                   | 0.203981  | 0.204862            | 0.161438            | 0.122563 | 0.144633 | 0.108587 | 0.125261       | 0.190094 | 0.685946 | 0.698014 | 0.02166   | -0.60177 |
| A0A0A0MQS2_kASIGTYVEDYVAVLEK_S3_1                | A0A0A0MQS2 | CLASRP  | 11129   | CLK4 associating serine/arginine rich protein | S102           |                   | 0.183895  | 0.229827            | 0.199276            | 0.092664 | 0.160036 | 0.112298 | 0.121666       | 0.204332 | 0.959433 | 0.6257   | 0.26766   | -0.74799 |
| A0A0A0MQS2_ITRPAAsPAVGGK_S7_1                    | A0A0A0MQS2 | CLASRP  | 11129   | CLK4 associating serine/arginine rich protein | S547           |                   | 0.245408  | 0.23305             | 0.23256             | 0.12622  | 0.162029 | 0.155923 | 0.148057       | 0.237006 | 0.624697 | 0.252428 | 0.001676  | -0.68777 |
| A0A0A0MR39_eVPGATGGdSHLQPAEPPGEP_R7_S11_1        | A0A0A0MR39 | MYF2    | 50804   | myelin expression factor 2                    | T13.S17        | 50.50             | 0.19573   | 0.203613            | 0.209533            | 0.124894 | 0.163081 | 0.128948 | 0.138974       | 0.202959 | 0.684742 | 0.796546 | 0.007399  | -0.54637 |
| A0A0A0MRM9_gSGISVQVNSK_S3_S5_1                   | A0A0A0MRM9 | NOLC1   | 9221    | nucleolar and coiled-body phosphoprotein 1    | 5695.S697      | 50.50             | 0.299189  | 0.268485            | 0.253498            | 0.057388 | 0.071632 | 0.058769 | 0.062746       | 0.27051  | 0.321955 | 0.312817 | 5.07E-05  | -2.10808 |
| A0A0A0MRM9_gSGISVQVNSKIFDSE_S15_1                | A0A0A0MRM9 | NOLC1   | 9221    | nucleolar and coiled-body phosphoprotein 1    | 5707           |                   | 0.105187  | 0.200009            | 0.188362            | 0.164106 | 0.166441 | 0.106679 | 0.19584        | 0.544334 | 0.058643 | 0.015968 | -0.87743  |          |
| A0A0A0MRM9_gSGISVQVNSK_S1_1                      | A0A0A0MRM9 | NOLC1   | 9221    | nucleolar and coiled-body phosphoprotein 1    | 5707           |                   | 0.265911  | 0.268107            | 0.303135            | 0.097514 | 0.122073 | 0.079872 | 0.09982        | 0.279051 | 0.357712 | 0.98355  | 0.00077   | -1.83131 |
| A0A0A0MRM9_gSYPGAGPLPPPPSQSPEPTPHPR_S14_1        | A0A0A0MRM9 | MBD1    | 4152    | methyl-CpG binding domain protein 1           | S330           |                   | 0.266714  | 0.295254            | 0.30297             | 0.188495 | 0.171964 | 0.182397 | 0.180952       | 0.288313 | 0.627625 | 0.321571 | 0.000483  | -0.67202 |
| A0A0A0MRM9_gSYPGAGPLPPPPSQSPEPTPHPR_S14_S16_1    | A0A0A0MRM9 | MBD1    | 4152    | methyl-CpG binding domain protein 1           | S330           |                   | 0.222767  | 0.186402            | 0.197609            | 0.148644 | 0.141659 | 0.119125 | 0.136476       | 0.20226  | 0.647575 | 0.813891 | 0.009228  | -0.56756 |
| A0A0A0MRM9_gSYPGAGPLPPPPSQSPEPTPHPR_S16_1        | A0A0A0MRM9 | MBD1    | 4152    | methyl-CpG binding domain protein 1           | S330.S332      | 49.77;49.77       | 0.195651  | 0.181944            | 0.222907            | 0.157289 | 0.138783 | 0.141046 | 0.1457006      | 0.20449  | 0.727988 | 0.379596 | 0.01231   | -0.45801 |
| A0A0A0MRM9_gSYPGAGPLPPPPSQSPEPTPHPR_S16_1        | A0A0A0MRM9 | MBD1    | 4152    | methyl-CpG binding domain protein 1           | S332           |                   | 0.219165  | 0.180648            | 0.225574            | 0.159707 | 0.151313 | 0.142046 | 0.151022       | 0.208462 | 0.724456 | 0.233444 | 0.018337  | -0.46503 |
| A0A0A0MT60_dGSLPPELCSIPSHR_S3_1                  | A0A0A0MT60 | FKBP15  | 23307   | FK506 binding protein 15                      | S1049          |                   | 0.251468  | 0.136643            | 0.185135            | 0.059391 | 0.072424 | 0.087663 | 0.073159       | 0.194862 | 0.382868 | 0.113667 | 0.026266  | -1.38508 |
| A0A0A0MT60_dGSLPPELCSIPSHR_S3_1                  | A0A0A0MT60 | FKBP15  | 23307   | FK506 binding protein 15                      | S1049          |                   | 0.196017  | 0.197445            | 0.162172            | 0.126368 | 0.148595 | 0.139754 | 0.138239       | 0.185211 | 0.746387 | 0.478151 | 0.023699  | -0.422   |
| A0A0A0MT60_dGSEAEALSEIKDGSLPPELCSIPSHR_S15_1     | A0A0A0MT60 | FKBP15  | 23307   | FK506 binding protein 15                      | S1049          |                   | 0.18081   | 0.166069            | 0.177769            | 0.037562 | 0.036097 | 0.02799  | 0.033883       | 0.176306 | 0.192182 | 0.448409 | 2.25E-05  | -2.37946 |
| A0A0A0MT60_dGSEAEALSEIKDGSLPPELCSIPSHR_S10_1     | A0A0A0MT60 | FKBP15  | 23307   | FK506 binding protein 15                      | S1043          |                   | 0.281142  | 0.1681              | 0.297858            | 0.05126  | 0.027613 | 0.042018 | 0.040297       | 0.294903 | 0.161814 | 0.055427 | 0.11229   | -2.62759 |
| A0A0A0MT60_dGSEAEALSEIKDGSLPPELCSIPSHR_S10_S16_1 | A0A0A0MT60 | FKBP15  | 23307   | FK506 binding protein 15                      | S1037.S1043    | 45.65;45.65       | 0.189867  | 0.195655            | 0.193438            | 0.048077 | 0.046864 | 0.047139 | 0.04736        | 0.192953 | 0.245444 | 0.093116 | 0.127E-07 | -2.02653 |
| A0A0A0MT60_nGSLNKLNSGIDFK_S7_1                   | A0A0A0MT60 | FKBP15  | 23307   | FK506 binding protein 15                      | T212           | 44.35;44.35       | 0.162527  | 0.220223            | 0.136532            | 0.064181 | 0.082624 | 0.114324 | 0.088257       | 0.173094 | 0.509877 | 0.512142 | 0.041603  | -0.97178 |
| A0A0A0MT3_kLTKNKHSGIDFK_T3_1                     | A0A0A0MT3  | ILK     | 3611    | integrin linked kinase                        | T712           |                   | 0.108633  | 0.144147            | 0.174377            | 0.08633  | 0.094517 | 0.125903 | 0.10225        | 0.184271 | 0.545889 | 0.343429 | 0.01796   | -0.84793 |
| A0A0B41J58_rLsQLAHTPTAFK_S3_1                    | A0A0B41J58 | PI4KB   | 5298    | phosphatidylinositol 4-kinase beta            | S523           |                   | 0.158055  | 0.194391            | 0.196186            | 0.109866 | 0.110879 | 0.104363 | 0.108109       | 0.182877 | 0.591156 | 0.047792 | 0.24222   | -0.75839 |
| A0A0                                             |            |         |         |                                               |                |                   |           |                     |                     |          |          |          |                |          |          |          |           |          |



|                                        |            |           |                                                                   |                |                   |                       |          |          |          |          |          |          |          |          |          |          |          |          |
|----------------------------------------|------------|-----------|-------------------------------------------------------------------|----------------|-------------------|-----------------------|----------|----------|----------|----------|----------|----------|----------|----------|----------|----------|----------|----------|
| AOA2R8Y4K8_nSDPVGHTEKvSLk_S14_1        | AOA2R8Y4K8 | SAMS/N1   | 64092 SAM domain, SH3 domain and nuclear localization signal S415 |                | 59.93             | GHTEKVSLSKASDSM       | 0.147691 | 0.173052 | 0.207099 | 0.078403 | 0.099419 | 0.081115 | 0.086313 | 0.175947 | 0.490559 | 0.256416 | 0.008262 | -1.0275  |
| AOA2R8Y611_nTTSkSPKPDVPMVK_T4_S5_S7_1  | AOA2R8Y611 | APD31     | 8943 adaptor related protein complex 3 delta 1 subunit            | T568.S569.S571 | 32.03;32.03;32.03 | QKRRHTETSKSPKPEKD_RKI | 0.116972 | 0.151837 | 0.130453 | 0.07546  | 0.101106 | 0.103718 | 0.093428 | 0.133088 | 0.702004 | 0.881974 | 0.04319  | -0.51045 |
| AOA2R8YDB8_VPQQQIHTHSPR_T9_S10_1       | AOA2R8YDB8 | SAP130    | 79595 Sin3A associated protein 130                                | T415.S416      | 49.96;49.96       | VPQIHTHSPRQIHTHSPR    | 0.231306 | 0.213015 | 0.166947 | 0.12342  | 0.120942 | 0.118905 | 0.203765 | 0.583565 | 0.095922 | 0.012014 | -0.77704 |          |
| AOA2R8YG42_msfGIYQK_S2_1               | AOA2R8YG42 | ARHGFE7   | 8874 Rho guanine nucleotide exchange factor 7                     | 5497           |                   | LGASFRMSGGFYIGK       | 0.149095 | 0.228464 | 0.178413 | 0.067487 | 0.126297 | 0.076365 | 0.09005  | 0.184451 | 0.488204 | 0.802448 | 0.303882 | -1.03445 |
| AOA2R8YG42_msfGIYQK_S2_Y6_1            | AOA2R8YG42 | ARHGFE7   | 8874 Rho guanine nucleotide exchange factor 7                     | 5497.Y501      | 50;50             | LGASFRMSGGFYIGK_FRI   | 0.138063 | 0.230646 | 0.180824 | 0.05827  | 0.107466 | 0.080954 | 0.08223  | 0.183875 | 0.448907 | 0.440407 | 0.029047 | -1.15551 |
| AOA3B3IRW6_nSRLEDDQVIGVALQASQ_S1_S3_1  | AOA3B3IRW6 | QSER1     | 79832 glutamine and serine rich 1                                 | 5742.S744      | 50;50             | YQVSGTIRSNRSLRQD_QS   | 0.192458 | 0.214613 | 0.166598 | 0.119952 | 0.145527 | 0.13555  | 0.139766 | 0.191223 | 0.69906  | 0.446853 | 0.021674 | -0.51651 |
| AOA3B3IS20_qLLQDQQQVQVGLKSPK_S17_1     | AOA3B3IS20 | FOXP1     | 27086 forkhead box P1                                             | 585            |                   | YQVSGTIRSNRSLRQD_QS   | 0.171313 | 0.210936 | 0.187588 | 0.11838  | 0.133348 | 0.13811  | 0.129946 | 0.189946 | 0.684122 | 0.421771 | 0.006629 | -0.54767 |
| AOA3B3IS20_rsdYKVVPISSDIAQNFYK_Y2_1    | AOA3B3IS20 | FOXP1     | 27086 forkhead box P1                                             | Y441           |                   | YQVPRIRRYSDKYNNV      | 0.178163 | 0.263709 | 0.201866 | 0.100396 | 0.126448 | 0.085551 | 0.104132 | 0.21458  | 0.485283 | 0.360259 | 0.017221 | -1.0431  |
| AOA3B3IS20_rsdYKVVPISSDIAQNFYK_Y2_S1_1 | AOA3B3IS20 | FOXP1     | 27086 forkhead box P1                                             | Y441.S442      | 50;50             | YQVPRIRRYSDKYNNV_FQ   | 0.281367 | 0.263324 | 0.268749 | 0.18007  | 0.134465 | 0.14467  | 0.153068 | 0.275468 | 0.552979 | 0.765662 | 0.001252 | -0.8457  |
| AOA3B3IT7_gIGLITASHNPGGPNDFGK_T8_1     | AOA3B3IT7  | PGM1      | 5236 phosphoglucomutase 1                                         | T115           |                   | HTGGIITLASHNPGG       | 0.145444 | 0.18901  | 0.167747 | 0.078921 | 0.123381 | 0.0959   | 0.103534 | 0.1674   | 0.618482 | 0.809959 | 0.017294 | -0.6932  |
| AOJNW5_smsYVLPKLDPLFK_S1_S3_1          | AOJNW5     | UHRF18P1L | 23074 UHRF1 binding protein 1 like                                | 5933.S935      | 49.72;49.72       | NMSGDNRSSGMSLSL_MSI   | 0.249527 | 0.289909 | 0.20839  | 0.059446 | 0.093798 | 0.065986 | 0.073077 | 0.249275 | 0.293156 | 0.333711 | 0.002398 | -1.77026 |
| AOJNW5_smsYVLPKLDPLFK_S1_S3_1          | AOJNW5     | SHTN1     | 57698 shootin 1                                                   | 5506           |                   | LATSESKSMFVLSGV       | 0.19123  | 0.217547 | 0.201445 | 0.106591 | 0.125275 | 0.148796 | 0.126888 | 0.203407 | 0.62381  | 0.564857 | 0.060652 | -0.68082 |
| AOJNW5_smsYVLPKLDPLFK_S1_S3_1          | AOJNW5     | SHTN1     | 57698 shootin 1                                                   | 5512           |                   | KMPVLGSGVSVTKT        | 0.235102 | 0.175615 | 0.186795 | 0.103083 | 0.104618 | 0.153806 | 0.120502 | 0.199171 | 0.605021 | 0.908788 | 0.033425 | -0.72494 |
| AOJNW5_smsYVLPKLDPLFK_S1_S3_1          | AOJNW5     | SHTN1     | 57698 shootin 1                                                   | 5528           |                   | SLPPKKEKSIKSGE        | 0.146992 | 0.233596 | 0.192488 | 0.041335 | 0.05978  | 0.034973 | 0.045363 | 0.191025 | 0.23747  | 0.162549 | 0.00505  | -2.07418 |
| AOJNW5_smsYVLPKLDPLFK_S1_S3_1          | AOJNW5     | SHTN1     | 57698 shootin 1                                                   | 5512           |                   | SKRFRSFTFVISA         | 0.199978 | 0.244117 | 0.191094 | 0.068923 | 0.113355 | 0.09567  | 0.092649 | 0.211729 | 0.437584 | 0.765811 | 0.004666 | -1.19237 |
| AOJNW5_smsYVLPKLDPLFK_S1_S3_1          | AOJNW5     | SHTN1     | 57698 shootin 1                                                   | 5528           |                   | SKRFRSFTFVISA         | 0.196688 | 0.230297 | 0.221029 | 0.08547  | 0.116075 | 0.092582 | 0.098043 | 0.216005 | 0.453891 | 0.91968  | 0.009082 | -1.13958 |
| AOJNW5_smsYVLPKLDPLFK_S1_S3_1          | AOJNW5     | SHTN1     | 57698 shootin 1                                                   | 5512           |                   | SKRFRSFTFVISA         | 0.196688 | 0.230297 | 0.221029 | 0.08547  | 0.116075 | 0.092582 | 0.098043 | 0.216005 | 0.453891 | 0.91968  | 0.009082 | -1.13958 |
| AOJNW5_smsYVLPKLDPLFK_S1_S3_1          | AOJNW5     | SHTN1     | 57698 shootin 1                                                   | 5512           |                   | SKRFRSFTFVISA         | 0.196688 | 0.230297 | 0.221029 | 0.08547  | 0.116075 | 0.092582 | 0.098043 | 0.216005 | 0.453891 | 0.91968  | 0.009082 | -1.13958 |
| AOJNW5_smsYVLPKLDPLFK_S1_S3_1          | AOJNW5     | SHTN1     | 57698 shootin 1                                                   | 5512           |                   | SKRFRSFTFVISA         | 0.196688 | 0.230297 | 0.221029 | 0.08547  | 0.116075 | 0.092582 | 0.098043 | 0.216005 | 0.453891 | 0.91968  | 0.009082 | -1.13958 |
| AOJNW5_smsYVLPKLDPLFK_S1_S3_1          | AOJNW5     | SHTN1     | 57698 shootin 1                                                   | 5512           |                   | SKRFRSFTFVISA         | 0.196688 | 0.230297 | 0.221029 | 0.08547  | 0.116075 | 0.092582 | 0.098043 | 0.216005 | 0.453891 | 0.91968  | 0.009082 | -1.13958 |
| AOJNW5_smsYVLPKLDPLFK_S1_S3_1          | AOJNW5     | SHTN1     | 57698 shootin 1                                                   | 5512           |                   | SKRFRSFTFVISA         | 0.196688 | 0.230297 | 0.221029 | 0.08547  | 0.116075 | 0.092582 | 0.098043 | 0.216005 | 0.453891 | 0.91968  | 0.009082 | -1.13958 |
| AOJNW5_smsYVLPKLDPLFK_S1_S3_1          | AOJNW5     | SHTN1     | 57698 shootin 1                                                   | 5512           |                   | SKRFRSFTFVISA         | 0.196688 | 0.230297 | 0.221029 | 0.08547  | 0.116075 | 0.092582 | 0.098043 | 0.216005 | 0.453891 | 0.91968  | 0.009082 | -1.13958 |
| AOJNW5_smsYVLPKLDPLFK_S1_S3_1          | AOJNW5     | SHTN1     | 57698 shootin 1                                                   | 5512           |                   | SKRFRSFTFVISA         | 0.196688 | 0.230297 | 0.221029 | 0.08547  | 0.116075 | 0.092582 | 0.098043 | 0.216005 | 0.453891 | 0.91968  | 0.009082 | -1.13958 |
| AOJNW5_smsYVLPKLDPLFK_S1_S3_1          | AOJNW5     | SHTN1     | 57698 shootin 1                                                   | 5512           |                   | SKRFRSFTFVISA         | 0.196688 | 0.230297 | 0.221029 | 0.08547  | 0.116075 | 0.092582 | 0.098043 | 0.216005 | 0.453891 | 0.91968  | 0.009082 | -1.13958 |
| AOJNW5_smsYVLPKLDPLFK_S1_S3_1          | AOJNW5     | SHTN1     | 57698 shootin 1                                                   | 5512           |                   | SKRFRSFTFVISA         | 0.196688 | 0.230297 | 0.221029 | 0.08547  | 0.116075 | 0.092582 | 0.098043 | 0.216005 | 0.453891 | 0.91968  | 0.009082 | -1.13958 |
| AOJNW5_smsYVLPKLDPLFK_S1_S3_1          | AOJNW5     | SHTN1     | 57698 shootin 1                                                   | 5512           |                   | SKRFRSFTFVISA         | 0.196688 | 0.230297 | 0.221029 | 0.08547  | 0.116075 | 0.092582 | 0.098043 | 0.216005 | 0.453891 | 0.91968  | 0.009082 | -1.13958 |
| AOJNW5_smsYVLPKLDPLFK_S1_S3_1          | AOJNW5     | SHTN1     | 57698 shootin 1                                                   | 5512           |                   | SKRFRSFTFVISA         | 0.196688 | 0.230297 | 0.221029 | 0.08547  | 0.116075 | 0.092582 | 0.098043 | 0.216005 | 0.453891 | 0.91968  | 0.009082 | -1.13958 |
| AOJNW5_smsYVLPKLDPLFK_S1_S3_1          | AOJNW5     | SHTN1     | 57698 shootin 1                                                   | 5512           |                   | SKRFRSFTFVISA         | 0.196688 | 0.230297 | 0.221029 | 0.08547  | 0.116075 | 0.092582 | 0.098043 | 0.216005 | 0.453891 | 0.91968  | 0.009082 | -1.13958 |
| AOJNW5_smsYVLPKLDPLFK_S1_S3_1          | AOJNW5     | SHTN1     | 57698 shootin 1                                                   | 5512           |                   | SKRFRSFTFVISA         | 0.196688 | 0.230297 | 0.221029 | 0.08547  | 0.116075 | 0.092582 | 0.098043 | 0.216005 | 0.453891 | 0.91968  | 0.009082 | -1.13958 |
| AOJNW5_smsYVLPKLDPLFK_S1_S3_1          | AOJNW5     | SHTN1     | 57698 shootin 1                                                   | 5512           |                   | SKRFRSFTFVISA         | 0.196688 | 0.230297 | 0.221029 | 0.08547  | 0.116075 | 0.092582 | 0.098043 | 0.216005 | 0.453891 | 0.91968  | 0.009082 | -1.13958 |
| AOJNW5_smsYVLPKLDPLFK_S1_S3_1          | AOJNW5     | SHTN1     | 57698 shootin 1                                                   | 5512           |                   | SKRFRSFTFVISA         | 0.196688 | 0.230297 | 0.221029 | 0.08547  | 0.116075 | 0.092582 | 0.098043 | 0.216005 | 0.453891 | 0.91968  | 0.009082 | -1.13958 |
| AOJNW5_smsYVLPKLDPLFK_S1_S3_1          | AOJNW5     | SHTN1     | 57698 shootin 1                                                   | 5512           |                   | SKRFRSFTFVISA         | 0.196688 | 0.230297 | 0.221029 | 0.08547  | 0.116075 | 0.092582 | 0.098043 | 0.216005 | 0.453891 | 0.91968  | 0.009082 | -1.13958 |
| AOJNW5_smsYVLPKLDPLFK_S1_S3_1          | AOJNW5     | SHTN1     | 57698 shootin 1                                                   | 5512           |                   | SKRFRSFTFVISA         | 0.196688 | 0.230297 | 0.221029 | 0.08547  | 0.116075 | 0.092582 | 0.098043 | 0.216005 | 0.453891 | 0.91968  | 0.009082 | -1.13958 |
| AOJNW5_smsYVLPKLDPLFK_S1_S3_1          | AOJNW5     | SHTN1     | 57698 shootin 1                                                   | 5512           |                   | SKRFRSFTFVISA         | 0.196688 | 0.230297 | 0.221029 | 0.08547  | 0.116075 | 0.092582 | 0.098043 | 0.216005 | 0.453891 | 0.91968  | 0.009082 | -1.13958 |
| AOJNW5_smsYVLPKLDPLFK_S1_S3_1          | AOJNW5     | SHTN1     | 57698 shootin 1                                                   | 5512           |                   | SKRFRSFTFVISA         | 0.196688 | 0.230297 | 0.221029 | 0.08547  | 0.116075 | 0.092582 | 0.098043 | 0.216005 | 0.453891 | 0.91968  | 0.009082 | -1.13958 |
| AOJNW5_smsYVLPKLDPLFK_S1_S3_1          | AOJNW5     | SHTN1     | 57698 shootin 1                                                   | 5512           |                   | SKRFRSFTFVISA         | 0.196688 | 0.230297 | 0.221029 | 0.08547  | 0.116075 | 0.092582 | 0.098043 | 0.216005 | 0.453891 | 0.91968  | 0.009082 | -1.13958 |
| AOJNW5_smsYVLPKLDPLFK_S1_S3_1          | AOJNW5     | SHTN1     | 57698 shootin 1                                                   | 5512           |                   | SKRFRSFTFVISA         | 0.196688 | 0.230297 | 0.221029 | 0.08547  | 0.116075 | 0.092582 | 0.098043 | 0.216005 | 0.453891 | 0.91968  | 0.009082 | -1.13958 |
| AOJNW5_smsYVLPKLDPLFK_S1_S3_1          | AOJNW5     | SHTN1     | 57698 shootin 1                                                   | 5512           |                   | SKRFRSFTFVISA         | 0.196688 | 0.230297 | 0.221029 | 0.08547  | 0.116075 | 0.092582 | 0.098043 | 0.216005 | 0.453891 | 0.91968  | 0.009082 | -1.13958 |
| AOJNW5_smsYVLPKLDPLFK_S1_S3_1          | AOJNW5     | SHTN1     | 57698 shootin 1                                                   | 5512           |                   | SKRFRSFTFVISA         | 0.196688 | 0.230297 | 0.221029 | 0.08547  | 0.116075 | 0.092582 | 0.098043 | 0.216005 | 0.453891 | 0.91968  | 0.009082 | -1.13958 |
| AOJNW5_smsYVLPKLDPLFK_S1_S3_1          | AOJNW5     | SHTN1     | 57698 shootin 1                                                   | 5512           |                   | SKRFRSFTFVISA         | 0.196688 | 0.230297 | 0.221029 | 0.08547  | 0.116075 | 0.092582 | 0.098043 | 0.216005 | 0.453891 | 0.91968  | 0.009082 | -1.13958 |
| AOJNW5_smsYVLPKLDPLFK_S1_S3_1          | AOJNW5     | SHTN1     | 57698 shootin 1                                                   | 5512           |                   | SKRFRSFTFVISA         | 0.196688 | 0.230297 | 0.221029 | 0.08547  | 0.116075 | 0.092582 | 0.098043 | 0.216005 | 0.453891 | 0.91968  | 0.009082 | -1.13958 |
| AOJNW5_smsYVLPKLDPLFK_S1_S3_1          | AOJNW5     | SHTN1     | 57698 shootin 1                                                   | 5512           |                   | SKRFRSFTFVISA         | 0.196688 | 0.230297 | 0.221029 | 0.08547  | 0.116075 | 0.092582 | 0.098043 | 0.216005 | 0.453891 | 0.91968  | 0.009082 | -1.13958 |
| AOJNW5_smsYVLPKLDPLFK_S1_S3_1          | AOJNW5     | SHTN1     | 57698 shootin 1                                                   | 5512           |                   | SKRFRSFTFVISA         | 0.196688 | 0.230297 | 0.221029 | 0.08547  | 0.116075 | 0.092582 | 0.098043 | 0.216005 | 0.453891 | 0.91968  | 0.009082 | -1.13958 |
| AOJNW5_smsYVLPKLDPLFK_S1_S3_1          | AOJNW5     | SHTN1     | 57698 shootin 1                                                   | 5512           |                   | SKRFRSFTFVISA         | 0.196688 | 0.230297 | 0.221029 | 0.08547  | 0.116075 | 0.092582 | 0.098043 | 0.216005 | 0.453891 | 0.91968  | 0.009082 | -1.13958 |
| AOJNW5_smsYVLPKLDPLFK_S1_S3_1          | AOJNW5     | SHTN1     | 57698 shootin 1                                                   | 5512           |                   | SKRFRSFTFVISA         | 0.196688 | 0.230297 | 0.221029 | 0.08547  | 0.116075 | 0.092582 | 0.098043 | 0.216005 | 0.453891 | 0.91968  | 0.009082 | -1.13958 |
| AOJNW5_smsYVLPKLDPLFK_S1_S3_1          | AOJNW5     | SHTN1     | 57698 shootin 1                                                   | 5512           |                   | SKRFRSFTFVISA         | 0.196688 | 0.230297 | 0.221029 | 0.08547  | 0.116075 | 0.092582 | 0.098043 | 0.216005 | 0.453891 | 0.91968  | 0.009082 | -1.13958 |
| AOJNW5_smsYVLPKLDPLFK_S1_S3_1          | AOJNW5     | SHTN1     | 57698 shootin 1                                                   | 5512           |                   | SKRFRSFTFVISA         | 0.196688 | 0.230297 | 0.221029 |          |          |          |          |          |          |          |          |          |

|                                                  |        |             |                |                                                            |                |                   |                      |          |          |          |          |          |          |          |          |          |          |          |          |
|--------------------------------------------------|--------|-------------|----------------|------------------------------------------------------------|----------------|-------------------|----------------------|----------|----------|----------|----------|----------|----------|----------|----------|----------|----------|----------|----------|
| E7EW49_mVsqSQPGRS5_1                             | E7EW49 | CLASP2      | 23122          | cytoplasmic linker associated protein 2                    | 5689           | 91.89             | RTKMQSQQPGRS5G       | 0.277138 | 0.204134 | 0.274185 | 0.091647 | 0.134857 | 0.150714 | 0.12574  | 0.251819 | 0.499325 | 0.707346 | 0.013175 | -1.00195 |
| E7EW49_rsdDIDVNAAGAK_S3_1                        | E7EW49 | CLASP2      | 23122          | cytoplasmic linker associated protein 2                    | 5604           | 100               | GLGQRSDIDVNAAG       | 0.235825 | 0.206814 | 0.209729 | 0.101971 | 0.136495 | 0.180399 | 0.118835 | 0.217456 | 0.54648  | 0.921879 | 0.009112 | -0.87176 |
| E7EW49_s555SQSLNRPFFSK_S1_1                      | E7EW49 | CLASP2      | 23122          | cytoplasmic linker associated protein 2                    | 5557           | 90.38             | SLKLRSDS555SQSLN     | 0.251939 | 0.222222 | 0.227535 | 0.136219 | 0.17877  | 0.144519 | 0.153169 | 0.233895 | 0.654859 | 0.660786 | 0.007117 | -0.61074 |
| E7EW49_s555SQSLNRPFFSK_S2_1                      | E7EW49 | CLASP2      | 23122          | cytoplasmic linker associated protein 2                    | 5561           | 99.37             | SRDSS555SQSLNRP      | 0.21849  | 0.200236 | 0.195935 | 0.117509 | 0.152909 | 0.108108 | 0.126175 | 0.204887 | 0.615828 | 0.408861 | 0.006757 | -0.6994  |
| EPAN27_isQTSLVPPGSGSPQR_S1_1                     | EPAN27 | RPS6KA1     | 6195           | ribosomal protein S6 kinase protein 2                      | 5326           | 85.75             | RKQRFRISSQTSLVPP     | 0.238942 | 0.208608 | 0.187621 | 0.063018 | 0.128103 | 0.155412 | 0.115511 | 0.211857 | 0.545929 | 0.461416 | 0.037116 | -0.87321 |
| EP9C47_sciDRSPGAGLSGSPASQR_S1_1                  | EP9C47 | LIMK1       | 3984           | LIM domain kinase 1                                        | 5326           | 90.81             | RQKVLRLRSCIDRSP      | 0.15739  | 0.121866 | 0.218911 | 0.111542 | 0.102623 | 0.107327 | 0.107644 | 0.196389 | 0.545627 | 0.034039 | 0.042833 | -0.77379 |
| EP9C47_sciDRSPGAGLSGSPASQR_S1_S3_1               | EP9C47 | LIMK1       | 3984           | LIM domain kinase 1                                        | 5326.5328      | 50:50             | RQKVLRLRSCIDRSP.KF   | 0.179706 | 0.21963  | 0.200973 | 0.129218 | 0.123218 | 0.115188 | 0.122542 | 0.200103 | 0.612392 | 0.20294  | 0.003165 | -0.80747 |
| EP9C47_sesLRVVCRPHR_S3_1                         | EP9C47 | LIMK1       | 3984           | LIM domain kinase 1                                        | 5323           | 92.66             | KLDRGSESRLVVCRPH     | 0.204975 | 0.197994 | 0.146225 | 0.099075 | 0.083792 | 0.083474 | 0.08878  | 0.183064 | 0.484968 | 0.943313 | 0.008029 | -1.04404 |
| EP9C69_fSDQAQPAITSNsYsk_Y15_1                    | EP9C69 | MARK2       | 2011           | microtubule affinity regulating kinase 2                   | Y452           | 83.73             | APDTSRSDSGLKQNSP     | 0.155239 | 0.180423 | 0.185656 | 0.098798 | 0.126278 | 0.118235 | 0.173773 | 0.380668 | 0.606038 | 0.141858 | -0.55555 |          |
| EP9C69_fSDQAQPAITSNsYsk_S3_1                     | EP9C69 | MARK2       | 2011           | microtubule affinity regulating kinase 2                   | 5409           | 100               | NPKQRFSDQAQPAIT      | 0.204288 | 0.203397 | 0.21362  | 0.080473 | 0.106039 | 0.116252 | 0.100921 | 0.207102 | 0.487302 | 0.172525 | 0.000675 | -1.03711 |
| EP9C69_sTFHAGQLR_S1_T2_1                         | EP9C69 | MARK2       | 2011           | microtubule affinity regulating kinase 2                   | 5594.T595      | 50:50             | PRGVSRTSFHAGQL.RG    | 0.201344 | 0.242308 | 0.234346 | 0.109225 | 0.105548 | 0.116442 | 0.110405 | 0.225999 | 0.48852  | 0.122252 | 0.006069 | -1.03351 |
| EP9F82_qETVdLck_T3_1                             | EP9F82 | CAMK2D      | 817            | calcium/calmodulin dependent protein kinase II delta       | T387           | 100               | SMHRQETVdLCKPKF      | 0.11925  | 0.283646 | 0.178197 | 0.016694 | 0.071099 | 0.041736 | 0.043176 | 0.193698 | 0.222905 | 0.193151 | 0.04093  | -2.1655  |
| EP9F82_sLlckPDGK_V1_1                            | EP9F82 | CAMK2D      | 817            | calcium/calmodulin dependent protein kinase II delta       | 7219           | 100               | RNFSAKLSLlckPDGK     | 0.223176 | 0.248848 | 0.248418 | 0.110236 | 0.086655 | 0.089077 | 0.095323 | 0.240147 | 0.396934 | 0.875623 | 0.000215 | -1.33303 |
| EP9FN4_vTRSGPDEAVDLGK_T3_S2_1                    | EP9FN4 | SLC4A7      | 9497           | solute carrier family 4 member 7                           | T18.S19        | 50:50             | PLLLTRVTRSGPDEE.PL   | 0.184801 | 0.195716 | 0.158877 | 0.127549 | 0.144577 | 0.09087  | 0.120998 | 0.179798 | 0.672969 | 0.644361 | 0.037843 | -0.57139 |
| EP9GK7_sNsLfk_S3_1                               | EP9GK7 | TRPM2       | 7226           | transient receptor potential cation channel subfamily M    | S38            | 95.9              | SNLRNSNSLfkS3R       | 0.149735 | 0.164845 | 0.165691 | 0.100882 | 0.134431 | 0.103256 | 0.112857 | 0.160091 | 0.704955 | 0.373924 | 0.016957 | -0.5044  |
| EP9N17_aGPVSPGvK_S5_1                            | EP9N17 | PARP10      | 84875          | poly (ADP-ribose) polymerase family member 10              | 5443           | 100               | LEKAGVSPGvK          | 0.169946 | 0.191797 | 0.160922 | 0.093888 | 0.124002 | 0.137839 | 0.118576 | 0.174222 | 0.680606 | 0.665822 | 0.024828 | -0.55511 |
| EP9PY8_aTAPQTHVPMR_S10_1                         | EP9PY8 | EEF1D       | 1936           | eukaryotic translation elongation factor 1 delta           | 5549           | 100               | QKQTHVPMRQVPLA       | 0.148192 | 0.183999 | 0.207092 | 0.092205 | 0.104243 | 0.082369 | 0.092939 | 0.197971 | 0.517015 | 0.239856 | 0.008498 | -0.95172 |
| EP9S24_qfCEGQPHVLEALSPQTSGLSPsR_S23_S25_1        | EP9S24 | MAF1        | 84232          | RNA methyl, negative regulator of RNA polymerase II        | 5688.570       | 49:73:49:73       | PQTSGLSFSPSLRCS.QT   | 0.185481 | 0.271292 | 0.202919 | 0.083163 | 0.129245 | 0.115074 | 0.109161 | 0.219879 | 0.496416 | 0.462223 | 0.019924 | -1.01038 |
| F22ZW7_vEHNGPTGLVGHsPPAQTGPPDNTLQETGTFPS: F22ZW7 | F22ZW7 | TRMT2A      | 27037          | trRNA methyltransferase 2 homolog A                        | 5620           | 95.29             | TRMT2A               | 0.148342 | 0.195618 | 0.171709 | 0.078068 | 0.121164 | 0.127118 | 0.108783 | 0.17189  | 0.632866 | 0.876733 | 0.037628 | -0.66003 |
| F22ZW7_vEHNGPTGLVGHsPPAQTGPPDNTLQETGTFPS: F22ZW7 | F22ZW7 | TRMT2A      | 27037          | trRNA methyltransferase 2 homolog A                        | 7626           | 79.79             | FRSPPAQTGPPDNT       | 0.165371 | 0.181238 | 0.164281 | 0.089323 | 0.126339 | 0.139269 | 0.11831  | 0.170297 | 0.694731 | 0.236425 | 0.031029 | -0.52547 |
| F5H269_sLALVAHTGLVPHQDPHHVHR_S1_1                | F5H269 | DMXL1       | 1657           | Dmx like 1                                                 | T324           | 100               | HBBRDRSGLVPHQDP      | 0.197372 | 0.2254   | 0.197043 | 0.137827 | 0.142177 | 0.146446 | 0.206605 | 0.708821 | 0.655879 | 0.006307 | -0.49651 |          |
| F5H527_KNISHHELLER_S3_1                          | F5H527 | SSH2        | 85464          | slingshot protein phosphatase 2                            | S811           | 100               | CRTPKNSHHELLER       | 0.197003 | 0.205914 | 0.160281 | 0.124185 | 0.145575 | 0.122478 | 0.130746 | 0.187733 | 0.696449 | 0.44132  | 0.027009 | -0.52191 |
| F5H527_sISESLFK_V1_1                             | F5H527 | SSH2        | 85464          | slingshot protein phosphatase 2                            | S811           | 99.45             | ECRTPKNSHISESLFK     | 0.189961 | 0.21185  | 0.164188 | 0.116455 | 0.123003 | 0.089318 | 0.109592 | 0.186666 | 0.580877 | 0.71833  | 0.010064 | -0.78369 |
| F8VU11_eLQQAELNRPsgFGfK_S11_1                    | F8VU11 | PRPF40B     | 25766          | pre-mRNA processing factor 40 homolog B                    | 5853           | 100               | QAEELNRPsgFGfK       | 0.17387  | 0.315314 | 0.268582 | 0.083252 | 0.122515 | 0.104971 | 0.103579 | 0.252589 | 0.41007  | 0.138648 | 0.025936 | -1.28606 |
| F8VU79_rtsLFANR_S3_1                             | F8VU79 | AGAP2       | 116986         | ArfGAP with GTPase domain, ankyrin repeat and PH domain    | 5648           | 94.72             | RAAKRRRTSLFANR.RA    | 0.335878 | 0.3126   | 0.23665  | 0.057974 | 0.088261 | 0.061757 | 0.095323 | 0.295403 | 0.234985 | 0.18371  | 0.009299 | -0.89396 |
| F8VU79_rtsLFANR_T2_S3_1                          | F8VU79 | AGAP2       | 116986         | ArfGAP with GTPase domain, ankyrin repeat and PH domain    | 7647.5648      | 50:50             | RAAKRRRTSLFANR.RA    | 0.253014 | 0.28169  | 0.169271 | 0.047818 | 0.087967 | 0.062398 | 0.066061 | 0.234658 | 0.281521 | 0.215964 | 0.009161 | -1.82869 |
| F8W7E0_sLTPAVPVSXPKDPKPSGK_S1_1                  | F8W7E0 | CAST        | 831            | calpastatin                                                | T149           | 91.38             | DKLREKRSLSLTPAVP     | 0.147427 | 0.19186  | 0.141747 | 0.091016 | 0.111598 | 0.074803 | 0.092472 | 0.16946  | 0.545686 | 0.30877  | 0.046809 | -0.87386 |
| G1UD79_sLHLLSFPNR_S7_S8_1                        | G1UD79 | FAM122B     | 159090         | family with sequence similarity 122B                       | 563.564        | 50:50             | SLHLLSFPNRIPS.HS     | 0.200408 | 0.187072 | 0.292881 | 0.10094  | 0.108299 | 0.14257  | 0.11727  | 0.226787 | 0.517092 | 0.258817 | 0.037244 | -0.95151 |
| G3V1A6_eSGSRFLPGATcLQEGEQGHsQk_S3_S23_2          | G3V1A6 | GSDMD       | 79792          | gasdermin D                                                | 5229.S249      | 98:96:99:99       | RTHKRRSGSRFLPG.GE    | 0.131168 | 0.137959 | 0.154172 | 0.085999 | 0.071164 | 0.085962 | 0.080875 | 0.140912 | 0.573938 | 0.666636 | 0.00204  | -0.80103 |
| G3V4K3_rTGSFQSLSDALDTPAK_S5_1                    | G3V4K3 | VIPAS39     | 63894          | VPS33B interacting protein, apical-basolateral polarity re | 5147           | 99.97             | RSFTRPQSGFQSLSDA     | 0.227351 | 0.309296 | 0.224519 | 0.053286 | 0.094699 | 0.081457 | 0.07648  | 0.253722 | 0.301434 | 0.323489 | 0.006293 | -1.73009 |
| G3V4K3_rTGSFQSLSDALDTPAK_T1_S5_S8_1              | G3V4K3 | VIPAS39     | 63894          | VPS33B interacting protein, apical-basolateral polarity re | 5147.S147.S150 | 33:17:33:17:33:17 | SFTFRPQSGFQSLSDA.RGI | 0.227351 | 0.309296 | 0.224519 | 0.053286 | 0.094699 | 0.081457 | 0.07648  | 0.253722 | 0.301434 | 0.323489 | 0.006293 | -1.73009 |
| G3V5R9_sAsLNVLVGGK_S2_S3_1                       | G3V5R9 | KLC1        | 3831           | kinesin light chain 1                                      | 5590.S591      | 50:50             | NGMKRASSLNVLVGG      | 0.234441 | 0.223624 | 0.227758 | 0.097909 | 0.14247  | 0.128205 | 0.122861 | 0.228874 | 0.538218 | 0.08963  | 0.01428  | -0.89374 |
| G3V5R9_sAsLNVLVGGK_S3_1                          | G3V5R9 | KLC1        | 3831           | kinesin light chain 1                                      | 5591           | 95.36             | PGMKRASSLNVLVGG      | 0.187856 | 0.211772 | 0.179211 | 0.099173 | 0.136754 | 0.113416 | 0.116448 | 0.192946 | 0.603524 | 0.882893 | 0.006431 | -0.72852 |
| G3V5R9_rAsLNVLVGGK_S4_S1_1                       | G3V5R9 | KLC1        | 3831           | kinesin light chain 1                                      | 5590.S591      | 50:50             | NGMKRASSLNVLVGG      | 0.228211 | 0.21425  | 0.21378  | 0.094056 | 0.139282 | 0.137003 | 0.123447 | 0.218475 | 0.564337 | 0.187684 | 0.00351  | -0.82537 |
| G3V5R9_rAsLNVLVGGK_S4_S1_1                       | G3V5R9 | KLC1        | 3831           | kinesin light chain 1                                      | 5591           | 94.61             | PGMKRASSLNVLVGG      | 0.196462 | 0.186831 | 0.194161 | 0.087035 | 0.124386 | 0.120851 | 0.110757 | 0.192875 | 0.575407 | 0.112306 | 0.002626 | -0.79735 |
| G3V5R9_rESLNVLVGGK_S4_S1_1                       | G3V5R9 | KLC1        | 3831           | kinesin light chain 1                                      | 5521           | 100               | ENMKRRSRLSLNVGG      | 0.168137 | 0.191614 | 0.194365 | 0.128664 | 0.11859  | 0.101865 | 0.116373 | 0.184705 | 0.630046 | 0.937324 | 0.003917 | -0.66647 |
| G5E9G6_kRSEsPPAELPSLR_S1_1                       | G5E9G6 | TRIP12      | 9320           | thyroid hormone receptor interactor 12                     | S354           | 99.2              | STMKRRSEsPPAELPS     | 0.159098 | 0.180091 | 0.172816 | 0.092349 | 0.145105 | 0.115268 | 0.117574 | 0.170668 | 0.688903 | 0.279382 | 0.032146 | -0.53763 |
| G5E9G6_rSEsPPAELPSLR_S4_1                        | G5E9G6 | TRIP12      | 9320           | thyroid hormone receptor interactor 12                     | S354           | 99.99             | STMKRRSEsPPAELPS     | 0.150156 | 0.17155  | 0.166851 | 0.077979 | 0.113271 | 0.083955 | 0.091375 | 0.162853 | 0.5663   | 0.523253 | 0.00498  | -0.82802 |
| G9CGD6_KNSKSPSVEINSI_S2_S4_S5_1                  | G9CGD6 | CKN3/IPCEF1 | 5889.5891.5892 | CKN3/IPCEF1 fusion protein                                 | 5796.T797      | 33:32:33:32:33:32 | TPQLKNSKSPSVEINSI    | 0.193131 | 0.217198 | 0.243378 | 0.135558 | 0.13034  | 0.158514 | 0.104178 | 0.239227 | 0.591398 | 0.203128 | 0.022741 | -0.7578  |
| G9CGD6_sLEQAQSLGDRRSPK_T16_T17_1                 | G9CGD6 | CKN3/IPCEF1 | 5889.5891.5892 | CKN3/IPCEF1 fusion protein                                 | 5796.T797      | 50:50             | PLGDRRSPKTKKRL.LGI   | 0.189055 | 0.184674 | 0.169349 | 0.123519 | 0.129156 | 0.112505 | 0.127112 | 0.180126 | 0.672428 | 0.802337 | 0.001645 | -0.57255 |
| HOY4E8_rASGDQSGSGKVsR_S12_1                      | HOY4E8 | SIK3        | 23387          | SIK family protein 3                                       | 5545           | 100               | PLGDRRSPKTKKRL.LGI   | 0.193131 | 0.217198 | 0.243378 | 0.135558 | 0.13034  | 0.158514 | 0.104178 | 0.239227 | 0.591398 | 0.203128 | 0.022741 | -0.7578  |
| HOY6H0_KaFDHSDPLSR_S3_1                          | HOY6H0 | KDM1B       | 221656         | lysine demethylase 1B                                      | 513            | 100               | QSTKRRKASDFRSDG      | 0.191162 | 0.185782 | 0.201733 | 0.126094 | 0.119488 | 0.113887 | 0.119823 | 0.192892 | 0.621191 | 0.732678 | 0.001239 | -0.68889 |
| HOY6A9_gDGOQSGSGKVsR_S12_1                       | HOY6A9 | HNRNPD      | 3184           | heteronucleolar ribonucleoprotein D                        | 5198           | 100               | GSYGVKRRGDRSHPQN     | 0.112383 | 0.130287 | 0.115814 | 0.0512   | 0.070538 | 0.07965  | 0.068744 | 0.132828 | 0.515737 | 0.661396 | 0.0144   | -0.95027 |
| HOYD70_rQGSVDYDPWK_S1_1                          | HOYD70 | REPS1       | 85021          | RALBP1 associated Eps domain containing 1                  | 5258           | 90.19             | AIETLRQGSVDYDPWK     | 0.17628  | 0.20997  | 0.206347 | 0.088604 | 0.147422 | 0.085685 | 0.107327 | 0.197532 | 0.542883 | 0.439822 | 0.016598 | -0.88129 |
| HOYD70_rTGSDDHNPISPLLVKPSDLLEENK_T2_1            | HOYD70 | REPS1       | 85021          | RALBP1 associated Eps domain containing 1                  | 7432           | 74.46             | QTELRQGSVDYDPWK      | 0.250034 | 0.25004  | 0.265348 | 0.168416 | 0.135752 | 0.141847 | 0.148671 | 0.250147 | 0.582704 | 0.411487 | 0.006096 | -0.77917 |
| H3BMD8_eLTAAPDKTEVTGDHIPPQDLQRKPsLVASK_H3BMD8    | H3BMD8 | ARPP19      | 10776          | CaM regulated phosphoprotein 19                            | 5123           | 97.89             | DLTKQRKPsLVASKL      | 0.241882 | 0.261903 | 0.237647 | 0.062718 | 0.118441 | 0.080458 | 0.087205 | 0.247144 | 0.352853 | 0.343158 | 0.004897 | -1.50286 |
| H7C1N3_BETLSIHEV_K1_1                            | H7C1N3 | KES1        | 10282          | BET1/gol vesicular membrane trafficking protein            | 563            | 99.99             | SKVTAIHEV_K1_1       | 0.22657  | 0.173829 | 0.164564 | 0.067812 | 0.105207 | 0.143112 | 0.108977 | 0.188231 | 0.578676 | 0.968663 | 0.041986 | -0.78917 |
| H8Y6P7_vSQAEQTSFDFNDFIDR_S3_1                    | H8Y6P7 | GCOM1       | 145781         | GRINL1A complex locus 1                                    | 5576           | 93.49             | HPRHVRSQAEQTSFDF     | 0.190337 | 0.176902 | 0.187606 | 0.111275 | 0.133419 | 0.115171 | 0.119955 | 0.184948 | 0.648588 | 0.530256 | 0.001226 | -0.62463 |

|                                                    |        |          |                                                                  |                   |                                     |                   |          |          |          |          |          |          |          |          |          |          |          |          |
|----------------------------------------------------|--------|----------|------------------------------------------------------------------|-------------------|-------------------------------------|-------------------|----------|----------|----------|----------|----------|----------|----------|----------|----------|----------|----------|----------|
| 000273_sISAskAsPPGDQLNPK_S8_1                      | 000273 | DFFA     | 1676 DNA fragmentation factor subunit alpha                      | S315              | 99.93                               | SISASKASPPGDLQN   | 0.153085 | 0.193569 | 0.184025 | 0.076783 | 0.129464 | 0.129925 | 0.112057 | 0.176893 | 0.633475 | 0.648565 | 0.039096 | -0.65864 |
| 000400_rPNGFShSLDMk_S8_1                           | 000400 | SLC33A1  | 9197 solute carrier family 3 member 1                            | S22               | 98.96                               | RFNGFShSLDMKSG    | 0.155003 | 0.141258 | 0.168905 | 0.103198 | 0.088782 | 0.099329 | 0.097103 | 0.155055 | 0.626246 | 0.451202 | 0.003079 | -0.6752  |
| 000443_nLVNQLPK_S0_1                               | 000443 | PIK3C2A  | 5286 phosphatidylinositol-4-phosphate 3-kinase catalytic subunit | S259              | 100                                 | KVSNLQVSPKSEDIS   | 0.180942 | 0.20416  | 0.196585 | 0.109532 | 0.162819 | 0.134809 | 0.13572  | 0.193896 | 0.699965 | 0.329617 | 0.025942 | -0.51465 |
| 000499_nVHEPAGVATGATLPKSPQLR_S20_S22_1             | 000499 | BIN1     | 274 bridging integrator 1                                        | S331.S333         | 50,50                               | PATLTKPSPQLRKG_AT | 0.197262 | 0.201251 | 0.200494 | 0.145523 | 0.127576 | 0.158593 | 0.143897 | 0.199789 | 0.720246 | 0.029768 | 0.023509 | -0.47344 |
| 000559_iEGGNVATQQLNLEQLPEYVFK_S14_1                | 000559 | EBAG9    | 9166 estrogen receptor binding site associated, antigen, 9       | S86               | 98.37                               | NVALTKPSPQLRPPD   | 0.121442 | 0.174781 | 0.145548 | 0.074192 | 0.085456 | 0.066856 | 0.075501 | 0.142752 | 0.512718 | 0.219117 | 0.011776 | -0.96376 |
| 000559_kLsgDQJLTPTVYDVSVPK_T8_1                    | 000559 | EBAG9    | 9166 estrogen receptor binding site associated, antigen, 9       | S86               | 98.59                               | KLSGDDQJLTPTVYD   | 0.13765  | 0.198661 | 0.167532 | 0.095364 | 0.125555 | 0.096029 | 0.105649 | 0.167948 | 0.629062 | 0.484172 | 0.03696  | -0.66873 |
| 000567_sfKELMSSDLEETAGSTSIPK_S1_1                  | 000567 | NOP56    | 10528 NOP56 ribonucleoprotein                                    | T41               | 87.45                               | SPFK8KLEMSDLEET   | 0.152944 | 0.188167 | 0.16488  | 0.110224 | 0.142008 | 0.127868 | 0.1267   | 0.168664 | 0.7512   | 0.882824 | 0.03866  | -0.41273 |
| 000567_sFskELMSSDLEETAGSTSIPK_S13_1                | 000567 | NOP56    | 10528 NOP56 ribonucleoprotein                                    | S511.S513         | 41.17,41.17                         | SPFK8KLEMSDLEET   | 0.165633 | 0.204188 | 0.173448 | 0.116648 | 0.149861 | 0.13903  | 0.13518  | 0.18109  | 0.74648  | 0.817021 | 0.039919 | -0.42183 |
| 000567_sFskELMSSDLEETAGSTSIPK_T15_1                | 000567 | NOP56    | 10528 NOP56 ribonucleoprotein                                    | T525              | 68.02                               | MSSDLEETAGSTSIP   | 0.177672 | 0.200019 | 0.173075 | 0.126923 | 0.145508 | 0.139599 | 0.137463 | 0.183589 | 0.748758 | 0.609333 | 0.009866 | -0.41743 |
| 014523_eAGLSQSHDLSNATATPSVR_S5_1                   | 014523 | C2CD2L   | 9854 C2CD2 like                                                  | S660              | 89.82                               | RQKAEGLSQSHDLS    | 0.159139 | 0.175306 | 0.16961  | 0.126611 | 0.123446 | 0.089313 | 0.113124 | 0.168019 | 0.673282 | 0.271278 | 0.012913 | -0.57072 |
| 014545_aLPSLNTGSSPR_S11_1                          | 014545 | TRAFD1   | 10906 TRAF-type zinc finger domain containing 1                  | S327              | 99.55                               | SLNTGSSPR_S11     | 0.175669 | 0.175162 | 0.149678 | 0.052321 | 0.10874  | 0.079272 | 0.080408 | 0.166836 | 0.481955 | 0.444989 | 0.008963 | -0.50303 |
| 014545_sTSPRPPGQPSSPCVPK_T2_S3_1                   | 014545 | TRAFD1   | 10906 TRAF-type zinc finger domain containing 1                  | T469.S470         | 47.75,47.75                         | YQLSRSTSPRPPGQ    | 0.155807 | 0.19668  | 0.139258 | 0.121225 | 0.093499 | 0.098146 | 0.10429  | 0.163915 | 0.636245 | 0.403057 | 0.035453 | -0.65235 |
| 014578_rVSEVAIVLQK_S3_1                            | 014578 | CIT      | 11113 citron rho-interacting serine/threonine kinase             | S480              | 100                                 | TRLRHRVSEVAIVLS   | 0.16462  | 0.229795 | 0.222665 | 0.102568 | 0.112002 | 0.121552 | 0.112041 | 0.205694 | 0.544697 | 0.131717 | 0.011823 | -0.87647 |
| 014617_nTETSKEPKDVPVMEK_T4_S5_S7_1                 | 014617 | AP3D1    | 8943 adaptor related protein complex 3 delta 1 subunit           | T826.S827.S829    | 32.03,32.03,32.03                   | QKRRNTETSKEPKED   | 0.129193 | 0.158889 | 0.141395 | 0.077555 | 0.102133 | 0.101535 | 0.093741 | 0.143159 | 0.654802 | 0.93749  | 0.013922 | -0.61087 |
| 014647_lKEHGIELSPR_S10_S11_1                       | 014647 | CHD2     | 1106 chromodomain helicase DNA binding protein 2                 | S1364.S1365       | 50,50                               | EHGIELSPRSHSDN    | 0.200414 | 0.190684 | 0.211112 | 0.13184  | 0.13132  | 0.112692 | 0.125284 | 0.200737 | 0.624121 | 0.934751 | 0.000943 | -0.6801  |
| 014828_dGNGFAEPSELDNPFQDPVAVHQHRSR_S27_1           | 014828 | SCAMP3   | 10067 secretory carrier membrane protein 3                       | S32               | 100                                 | AVIQHRPSRQVATLD   | 0.192345 | 0.164475 | 0.241458 | 0.060408 | 0.070353 | 0.053702 | 0.061488 | 0.199426 | 0.308323 | 0.088326 | 0.0039   | -1.69749 |
| 014828_nYGSYTQASAAAATAEILK_S4_1                    | 014828 | SCAMP3   | 10067 secretory carrier membrane protein 3                       | S85               | 76.74                               | YVIRGNSYFPVTPQSA  | 0.209129 | 0.233702 | 0.241166 | 0.108626 | 0.116416 | 0.093428 | 0.106157 | 0.227994 | 0.465601 | 0.654516 | 0.000496 | -1.0283  |
| 014828_nYGSYTQASAAAATAEILK_S4_T7_1                 | 014828 | SCAMP3   | 10067 secretory carrier membrane protein 3                       | S85.T88           | 48.05,48.05                         | TEPRNYSYSTQASA    | 0.221154 | 0.19945  | 0.232549 | 0.118672 | 0.112545 | 0.13746  | 0.128892 | 0.217861 | 0.564085 | 0.744417 | 0.001508 | -0.82602 |
| 014908_sAGGRPGSGQLGTGR_S3_1                        | 014908 | GIPC1    | 10755 GIPC PDZ domain containing family member 1                 | S225              | 99.85                               | FDMISRQSGAGRPGS   | 0.142182 | 0.180665 | 0.219573 | 0.08695  | 0.067238 | 0.099745 | 0.046455 | 0.181483 | 0.466404 | 0.316703 | 0.015076 | -1.10305 |
| 014974_kTGSYGALAEITASK_T2_1                        | 014974 | PPP1R12A | 4659 protein phosphatase 1 regulatory subunit 12A                | T443              | 99.85                               | WRLGLRRTGSYGALA   | 0.230055 | 0.256597 | 0.176018 | 0.078109 | 0.114898 | 0.091287 | 0.094765 | 0.20289  | 0.429014 | 0.341667 | 0.008375 | -1.2209  |
| 014974_rLAsTSDIEK_S4_T5_1                          | 014974 | PPP1R12A | 4659 protein phosphatase 1 regulatory subunit 12A                | S507.T508         | 48.66,48.66                         | T233729           | 0.221557 | 0.168233 | 0.073866 | 0.157072 | 0.102436 | 0.110964 | 0.20784  | 0.533894 | 0.803958 | 0.038885 | -0.90537 |          |
| 014974_rLAsTSDIEK_S4_1                             | 014974 | PPP1R12A | 4659 protein phosphatase 1 regulatory subunit 12A                | S507              | 83.04                               | T1PRLLAsTSDIEEK   | 0.285813 | 0.197886 | 0.237091 | 0.130859 | 0.101659 | 0.128378 | 0.120299 | 0.234263 | 0.513518 | 0.157075 | 0.023572 | -0.96151 |
| 014974_rLAsTSDIEK_S6_1                             | 014974 | PPP1R12A | 4659 protein phosphatase 1 regulatory subunit 12A                | S509              | 99.49                               | PRLLAsTSDIEKEN    | 0.187175 | 0.218121 | 0.136112 | 0.072746 | 0.119203 | 0.078207 | 0.090052 | 0.180469 | 0.498988 | 0.546445 | 0.032165 | -1.00292 |
| 014974_tGSYGALAEITASK_S3_1                         | 014974 | PPP1R12A | 4659 protein phosphatase 1 regulatory subunit 12A                | T445              | 91.04                               | LGLRRTGSYGALAEI   | 0.236608 | 0.205181 | 0.16376  | 0.045025 | 0.094939 | 0.071343 | 0.070436 | 0.20185  | 0.34895  | 0.636865 | 0.006776 | -1.51891 |
| 014974_tGSYGALAEITASK_T1_1                         | 014974 | PPP1R12A | 4659 protein phosphatase 1 regulatory subunit 12A                | S443              | 87.99                               | WRLGLRRTGSYGALA   | 0.206843 | 0.216043 | 0.151042 | 0.061122 | 0.10448  | 0.060967 | 0.067186 | 0.191309 | 0.351193 | 0.487702 | 0.012091 | -1.50966 |
| 015014_aPSTLDLVK_S3_1                              | 015014 | ZN609    | 23600 zinc finger protein 609                                    | S1055             | 92.67                               | PLTKAPSTLDLVK     | 0.245623 | 0.245678 | 0.230924 | 0.097458 | 0.139538 | 0.125016 | 0.12071  | 0.240741 | 0.501246 | 0.273252 | 0.008029 | -0.99641 |
| 015014_lVEPHSPSPK_S6_1                             | 015014 | ZN609    | 23600 zinc finger protein 609                                    | S576              | 99.92                               | VRLVEPHSPSPKSF    | 0.20553  | 0.238181 | 0.214063 | 0.162468 | 0.177898 | 0.149285 | 0.163621 | 0.219258 | 0.744406 | 0.833958 | 0.011926 | -0.42584 |
| 015014_nMSGATGLPGTK_S3_1                           | 015014 | ZN609    | 23600 zinc finger protein 609                                    | S467              | 99.99                               | SKRVNMSGATGLPG    | 0.206653 | 0.21668  | 0.207776 | 0.147262 | 0.154557 | 0.151817 | 0.151212 | 0.215036 | 0.703192 | 0.467008 | 0.011327 | -0.50801 |
| 015037_lHNGNASPRVPSPPAPEPWHHCGRD_S07_S12_1         | 015037 | KHNYN    | 23351 KH and NYN domain containing                               | S353.S359         | 100,100                             | RLHNGNASPRVPSPP   | 0.172356 | 0.193141 | 0.184535 | 0.126152 | 0.123222 | 0.077976 | 0.191177 | 0.183344 | 0.951548 | 0.260035 | 0.011335 | -0.74968 |
| 015042_nMLEIKELK_S1_1                              | 015042 | UZSURP   | 23350 UZ snRNP associated SURP domain containing                 | S202              | 100                                 | GEKPKYKSNLEIKPE   | 0.195988 | 0.212214 | 0.234551 | 0.114716 | 0.15434  | 0.065542 | 0.111533 | 0.214251 | 0.520569 | 0.318543 | 0.012444 | -0.94184 |
| 015047_rRCSSTAAVAGTAVGTGNGTSCQDTSFSSR_S0_1         | 015047 | SETD1A   | 9739 SET domain containing 1                                     | S221.S222         | 43.07,43.07                         | AEKRRSSSTAAVAGT   | 0.141443 | 0.17567  | 0.152857 | 0.123264 | 0.10674  | 0.100657 | 0.11022  | 0.156789 | 0.703579 | 0.621301 | 0.018587 | -0.50722 |
| 015085_sSQSFTHHLPVVEVKGPNVR_S1_S12_2               | 015085 | ARHGFE11 | 9826 Rho guanine nucleotide exchange factor 11                   | S545.S556         | 57.96,99.99                         | KYIKPKPSSSQTFTH   | 0.15901  | 0.201307 | 0.263911 | 0.162891 | 0.141938 | 0.131006 | 0.114524 | 0.221409 | 0.656152 | 0.324377 | 0.030571 | -0.6079  |
| 015085_sSQSFTHHLPVVEVKGPNVR_S2_S3_S5_S12_2         | 015085 | ARHGFE11 | 9826 Rho guanine nucleotide exchange factor 11                   | S545.S547.S549.T5 | 24.09,24.09,24.09,24.09,24.09,24.09 | YIPRKRKSSSQTFTHI  | 0.199409 | 0.201132 | 0.196436 | 0.125883 | 0.127968 | 0.095475 | 0.146278 | 0.184325 | 0.634013 | 0.682619 | 0.019269 | -0.66286 |
| 015126_nVPPGLDEYVFPDSRTPPPGGLHTL_T1_1              | 015126 | SCAMP1   | 9522 secretory carrier membrane protein 1                        | T45               | 50                                  | NPVGLDRTPPPGGLH   | 0.150439 | 0.17069  | 0.170352 | 0.082366 | 0.118151 | 0.123286 | 0.107934 | 0.202126 | 0.658883 | 0.425923 | 0.018258 | -0.60202 |
| 015126_rKDDAPYVPPPTAAASAPAGDLSNGLHDTR_S18_1        | 015126 | ZBTB7B   | 51043 zinc finger and BTB domain containing 7B                   | S480              | 80                                  | PFSTAAASAPAGDLS   | 0.26886  | 0.223643 | 0.26207  | 0.147726 | 0.166927 | 0.148894 | 0.154515 | 0.250924 | 0.615785 | 0.334641 | 0.011959 | -0.6995  |
| 015164_sEWLDPKSPHLHVGTR_S10_1                      | 015164 | TRIM24   | 8805 tripartite motif containing 24                              | S811              | 100                                 | WLDPSKSPHLHVGTR   | 0.199849 | 0.202522 | 0.206105 | 0.110303 | 0.118975 | 0.141696 | 0.123658 | 0.202826 | 0.609677 | 0.072276 | 0.011149 | -0.71388 |
| 015164_sEWLDPKSPHLHVGTR_S7_1                       | 015164 | TRIM24   | 8805 tripartite motif containing 24                              | S808              | 90.3                                | KSEWLDPSKSPHLH    | 0.196475 | 0.207219 | 0.212103 | 0.119578 | 0.145585 | 0.139794 | 0.134896 | 0.214021 | 0.630712 | 0.409711 | 0.008866 | -0.66495 |
| 015226_sGEGIRPISVK_S1_1                            | 015226 | NKRF     | 55922 NFKB repressing factor                                     | S572              | 100                                 | TGGGLSAGEGIRP     | 0.194376 | 0.176708 | 0.182884 | 0.062457 | 0.103115 | 0.079449 | 0.081674 | 0.184643 | 0.442333 | 0.321966 | 0.010324 | -1.17679 |
| 015355_kLEEVLTGFEAENGSDK_S7_1                      | 015355 | PPM1G    | 5496 protein phosphatase, Mg2+/Mn2+ dependent 1G                 | S527              | 90.48                               | RKLVEEVLTGFEAENG  | 0.173477 | 0.201249 | 0.169794 | 0.094131 | 0.11402  | 0.069024 | 0.092391 | 0.191357 | 0.508773 | 0.732086 | 0.005485 | -0.97491 |
| 015553_kSPGSLPQPLPCK_S7_1                          | 015553 | MEFV     | 4210 Mediterranean fever                                         | S368              | 99.96                               | KSPGSLPQPLPCK     | 0.174091 | 0.213361 | 0.177002 | 0.123647 | 0.132675 | 0.133032 | 0.129785 | 0.188152 | 0.689788 | 0.115528 | 0.010909 | -0.53578 |
| 015553_sLEVITISGK_S1_T5_1                          | 015553 | MEFV     | 4210 Mediterranean fever                                         | S242.T246         | 50,50                               | SGMVRISLEVITISG   | 0.174973 | 0.166342 | 0.115589 | 0.117355 | 0.108704 | 0.091552 | 0.10587  | 0.164301 | 0.644366 | 0.898562 | 0.046062 | -0.63405 |
| 015553_rSYPALGGR_S3_1                              | 015553 | MEFV     | 4210 Mediterranean fever                                         | S179              | 99.93                               | QKGRSYPALGGR      | 0.174134 | 0.209991 | 0.178219 | 0.089481 | 0.120538 | 0.100507 | 0.103509 | 0.174115 | 0.594846 | 0.127828 | 0.001678 | -0.75029 |
| 043149_tSVVEEHFQASVSPTEAAPATGDQSPGLGTQPK_T1_043149 | 043149 | ZNF21    | 23140 zinc finger ZZ-type and EF-hand domain containing 1        | T1462.S1463.S1464 | 33.28,33.28,33.28                   | LSVVEEHFQASVSPTE  | 0.199318 | 0.161994 | 0.252173 | 0.151982 | 0.146199 | 0.149507 | 0.149229 | 0.207071 | 0.720873 | 0.606196 | 0.030722 | -0.47218 |
| 043164_kLUSQVDQETGFRNHAK_S4_S5_S6_1                | 043164 | PIA2     | 9867 praja rin finger ubiquitin ligase 2                         | S323.S324.S325    | 33.32,33.32,33.32                   | KLUSQVDQETGFRNH   | 0.19645  | 0.185618 | 0.142705 | 0.098486 | 0.101596 | 0.073374 | 0.088152 | 0.175991 | 0.500889 | 0.370991 | 0.009821 | -0.99744 |
| 043353_rSPLNLLQK_S1_S3_1                           | 043353 | RIPK2    | 8767 receptor interacting serine/threonine kinase 2              | S529.S53          |                                     |                   |          |          |          |          |          |          |          |          |          |          |          |          |

|                                                  |        |         |                                                                             |                   |             |       |                    |          |          |          |          |          |          |          |          |          |          |          |          |
|--------------------------------------------------|--------|---------|-----------------------------------------------------------------------------|-------------------|-------------|-------|--------------------|----------|----------|----------|----------|----------|----------|----------|----------|----------|----------|----------|----------|
| O60664_eLVSSkvsGAQEMVSSAK_S8_1                   | O60664 | PLIN3   | 10226 perlipin 3                                                            | 5130              |             | 97.72 | ELVSSkvsGAQEMVSS   | 0.228348 | 0.239112 | 0.181147 | 0.075696 | 0.085456 | 0.109596 | 0.090249 | 0.216202 | 0.417431 | 0.485254 | 0.00353  | -1.26039 |
| O60861_rYVVNTTNETTWERPSSGGIPAsPGSHR_S25_1        | O60861 | GA57    | 8522 growth arrest specific 7                                               | 5117              |             | 97.66 | SSPGIPAsPGSHRS     | 0.280814 | 0.203077 | 0.190299 | 0.157212 | 0.157797 | 0.139008 | 0.151339 | 0.200663 | 0.754946 | 0.845487 | 0.003763 | -0.40555 |
| O60934_iPnyQLSPTKLPSiNK_S7_1                     | O60934 | NBN     | 8484 nibrin                                                                 | 5432              |             | 97.66 | RIPNYQLSPTKLPSiNK  | 0.169039 | 0.206957 | 0.152241 | 0.093888 | 0.137767 | 0.122572 | 0.118707 | 0.176079 | 0.670584 | 0.77451  | 0.048527 | -0.57651 |
| O75044_hNGIDGLPQHVIVQDTEGdVVERSpk_S26_S27_1      | O75044 | SRGAP2  | 23380 SLIT-ROBO Rho GTPase activating protein 2                             | 5795.5796         | 50:50       |       | EDGdVVERSpkSRIE_DG | 0.187728 | 0.234772 | 0.206446 | 0.128496 | 0.146128 | 0.072179 | 0.115601 | 0.209649 | 0.551404 | 0.546541 | 0.022854 | -0.85882 |
| O75044_sFNNHRMPDPEVIAQDIEATnMSALNELR_S1_1        | O75044 | SRGAP2  | 23380 SLIT-ROBO Rho GTPase activating protein 2                             | 5795.5796         |             |       | 0.183115           | 0.236266 | 0.206155 | 0.084324 | 0.109156 | 0.067419 | 0.086966 | 0.208612 | 0.41708  | 0.765722 | 0.00342  | -1.2616  |          |
| O75044_ksFNNHRMPDPEVIAQDIEATnMSALNELR_S3_1       | O75044 | SRGAP2  | 23380 SLIT-ROBO Rho GTPase activating protein 2                             | 5930              |             |       | 0.193012           | 0.243431 | 0.237575 | 0.076804 | 0.099511 | 0.082029 | 0.086114 | 0.258301 | 0.333388 | 0.051331 | 0.015896 | -1.58473 |          |
| O75113_nKAgPVElTK_T5_1                           | O75113 | N4BP1   | 9685 NEDA-binding protein 1                                                 | 7242              |             | 98.65 | EARKnAgPVElTK      | 0.217445 | 0.196353 | 0.334766 | 0.166144 | 0.16102  | 0.160429 | 0.162531 | 0.216188 | 0.751805 | 0.05199  | 0.008500 | -0.41157 |
| O75113_qfsLENVQEGLHDAK_S3_1                      | O75113 | N4BP1   | 9683 NEDA binding protein 1                                                 | 5100              |             |       | 0.209104           | 0.185653 | 0.20131  | 0.115081 | 0.113975 | 0.106565 | 0.111873 | 0.198689 | 0.560308 | 0.261385 | 0.003001 | -0.82864 |          |
| O75151_rPsASPPNNTAAK_S3_1                        | O75151 | PHF2    | 5253 PHD finger protein 2                                                   | 51056             |             | 89    | FLTQRPsASPPNNTAAK  | 0.174262 | 0.1944   | 0.287133 | 0.099009 | 0.14378  | 0.091746 | 0.111512 | 0.218597 | 0.501024 | 0.359488 | 0.049289 | -0.97108 |
| O75152_dSLVLPPTQSSSDsPPEVSGPSSQMSMk_S12_S15_1    | O75152 | ZC3H11A | 9877 zinc finger CCH-type containing 11A                                    | 5735.5738         | 42.94;42.94 |       | LPTTQSSSDsPPEVSG   | 0.174306 | 0.179415 | 0.191973 | 0.138243 | 0.138302 | 0.135887 | 0.137477 | 0.181898 | 0.755794 | 0.044876 | 0.021209 | -0.40394 |
| O75152_dSLVLPPTQSSSDsPPEVSGPSSQMSMk_S14_S15_1    | O75152 | ZC3H11A | 9877 zinc finger CCH-type containing 11A                                    | 5737.5738         | 49.63;49.63 |       | PTQSSSDsPPEVSG     | 0.144666 | 0.167629 | 0.169753 | 0.087613 | 0.101046 | 0.13276  | 0.10714  | 0.161347 | 0.664703 | 0.465252 | 0.023845 | -0.59067 |
| O75152_dSLVLPPTQSSSDsPPEVSGPSSQMSMk_S15_1        | O75152 | ZC3H11A | 9877 zinc finger CCH-type containing 11A                                    | 5738              |             | 74.06 | TQSSSDsPPEVSGP     | 0.134617 | 0.167065 | 0.150509 | 0.094883 | 0.094007 | 0.10007  | 0.09632  | 0.15073  | 0.639022 | 0.078374 | 0.004701 | -0.64606 |
| O75152_kfSAGGDSDPPLK_S3_1                        | O75152 | ZC3H11A | 9877 zinc finger CCH-type containing 11A                                    | 5290              |             |       | 0.195801           | 0.290945 | 0.217147 | 0.062521 | 0.085001 | 0.043296 | 0.063606 | 0.234631 | 0.271089 | 0.297611 | 0.005419 | -1.88316 |          |
| O75152_kfSAGGDSDPPLK_S3_1                        | O75152 | ZC3H11A | 9877 zinc finger CCH-type containing 11A                                    | 5290              |             | 99.72 | RLGKRKkSAGGDSDP    | 0.26226  | 0.283409 | 0.230322 | 0.081382 | 0.090252 | 0.066585 | 0.079407 | 0.258663 | 0.306988 | 0.33536  | 0.00448  | -1.70375 |
| O75152_kfSAGGDSDPPLK_S3_1                        | O75152 | ZC3H11A | 9877 zinc finger CCH-type containing 11A                                    | 7321              |             |       | 0.243716           | 0.190739 | 0.22709  | 0.164531 | 0.132311 | 0.118261 | 0.138367 | 0.220515 | 0.627475 | 0.867892 | 0.060808 | -0.67237 |          |
| O75152_kfSAGGDSDPPLK_S3_1                        | O75152 | ZC3H11A | 9877 zinc finger CCH-type containing 11A                                    | 5290              |             | 86.02 | MKTRRLSLASATGKSP   | 0.239672 | 0.265291 | 0.291099 | 0.097891 | 0.160112 | 0.109307 | 0.122437 | 0.265354 | 0.461409 | 0.752058 | 0.004412 | -1.15588 |
| O75152_kfSAGGDSDPPLK_S3_1                        | O75152 | ZC3H11A | 9877 zinc finger CCH-type containing 11A                                    | 5759              |             | 99.46 | RLGKRKkSAGGDSDP    | 0.198649 | 0.17706  | 0.17407  | 0.049679 | 0.083376 | 0.086842 | 0.073299 | 0.183236 | 0.399974 | 0.598253 | 0.001481 | -1.32202 |
| O75152_kfSAGGDSDPPLK_S3_1                        | O75152 | ZC3H11A | 9877 zinc finger CCH-type containing 11A                                    | 5758              |             |       | 0.210243           | 0.278593 | 0.179853 | 0.060136 | 0.107422 | 0.053085 | 0.073548 | 0.228896 | 0.329964 | 0.50898  | 0.001154 | -1.59962 |          |
| O75152_rLSAsTgkPPLSvEDDFEK_S13_1                 | O75152 | ZC3H11A | 9877 zinc finger CCH-type containing 11A                                    | 5768              |             | 84.48 | SMKTRrLSAsTgkP     | 0.225745 | 0.274219 | 0.216033 | 0.077864 | 0.124561 | 0.064565 | 0.085987 | 0.238666 | 0.372894 | 0.989192 | 0.02462  | -1.42316 |
| O75152_rLSAsTgkPPLSvEDDFEK_S3_1                  | O75152 | ZC3H11A | 9877 zinc finger CCH-type containing 11A                                    | 5758              |             | 97.71 | SKSVrASrPPLSvE     | 0.17462  | 0.246065 | 0.200897 | 0.087201 | 0.150607 | 0.095437 | 0.111802 | 0.207194 | 0.536125 | 0.953018 | 0.29022  | -0.89936 |
| O75179_apsPAPSvPLGSEKSPNVDQR_S3_1                | O75179 | ANKRD17 | 26057 ankryin repeat domain 17                                              | 5407              |             | 100   | AEANKrASrLLELED    | 0.198231 | 0.194902 | 0.187995 | 0.059204 | 0.101357 | 0.089514 | 0.083358 | 0.19371  | 0.440326 | 0.109605 | 0.00128  | -1.2165  |
| O75179_nAaLLEIDLEK_S3_1                          | O75179 | NCOR1   | 9611 nuclear receptor corepressor 1                                         | 5253              |             | 97.71 | SVSRGrSfADrPAsP    | 0.171175 | 0.194186 | 0.173647 | 0.077513 | 0.143254 | 0.085223 | 0.101997 | 0.179669 | 0.567693 | 0.219944 | 0.021493 | -0.81682 |
| O75376_gHfADrPAsNLGLEIDIRK_S3_1                  | O75376 | NCOR1   | 9611 nuclear receptor corepressor 1                                         | 5253              |             | 92.78 | GKHSrASfPISGQPc    | 0.211497 | 0.225494 | 0.26106  | 0.125788 | 0.147744 | 0.137678 | 0.236284 | 0.591699 | 0.91762  | 0.065967 | -0.75708 |          |
| O75376_hEAPSPISGQPcGDONAsPcS6_1                  | O75376 | NCOR1   | 9611 nuclear receptor corepressor 1                                         | 5253              |             | 90.52 | LQTESKrPFWVQST     | 0.173683 | 0.15333  | 0.212674 | 0.125857 | 0.102051 | 0.098238 | 0.108715 | 0.197896 | 0.604323 | 0.395315 | 0.02154  | -0.72661 |
| O75376_krPEVADrSRRIHESIGSQGkPFDNNSGQASi_T2_1     | O75376 | NCOR1   | 9611 nuclear receptor corepressor 1                                         | 5224              |             | 100   | PPEKSPFWVQST       | 0.170348 | 0.205311 | 0.207857 | 0.125788 | 0.15018  | 0.121469 | 0.132479 | 0.194505 | 0.681107 | 0.705949 | 0.01477  | -0.55405 |
| O75376_krPEVADrSRRIHESIGSQGkPFDNNSGQASi_T2_1     | O75376 | NCOR1   | 9611 nuclear receptor corepressor 1                                         | 570               |             | 100   | QLKRRrPFLLESEFP    | 0.197993 | 0.256619 | 0.281106 | 0.099215 | 0.129932 | 0.080387 | 0.103178 | 0.245239 | 0.420774 | 0.51069  | 0.00763  | -1.24906 |
| O75376_rRPsLSEFHGSDrPQER_S4_1                    | O75376 | NCOR1   | 9611 nuclear receptor corepressor 1                                         | 570               |             | 98.36 | QLKRRrPFLLESEFP    | 0.200414 | 0.214163 | 0.215967 | 0.139536 | 0.141663 | 0.132821 | 0.138261 | 0.21009  | 0.656892 | 0.442708 | 0.00622  | -0.60627 |
| O75376_rRPsLSEFHGSDrPQER_S4_1                    | O75376 | NCOR1   | 9611 nuclear receptor corepressor 1                                         | 570               |             | 100   | PEYrPISFPQVSYV     | 0.177439 | 0.228206 | 0.244381 | 0.156669 | 0.158869 | 0.133978 | 0.149839 | 0.216676 | 0.691535 | 0.269352 | 0.02682  | -0.53213 |
| O75376_rRPsLSEFHGSDrPQER_S4_1                    | O75376 | NCOR1   | 9611 nuclear receptor corepressor 1                                         | 52184             |             | 99.23 | EQrNDrSfPISGQV     | 0.218658 | 0.199391 | 0.221666 | 0.107999 | 0.139659 | 0.096472 | 0.117412 | 0.213238 | 0.452144 | 0.036622 | 0.03622  | -0.89447 |
| O75376_sPGISVLPsFFTK_S4_1                        | O75376 | NCOR1   | 9611 nuclear receptor corepressor 1                                         | 52184             |             | 100   | IEPrNRLrDPLDSEV    | 0.225424 | 0.17     | 0.332365 | 0.109875 | 0.17201  | 0.120567 | 0.134151 | 0.278643 | 0.481443 | 0.556953 | 0.016462 | -1.05456 |
| O75385_nKsPTQFOTR_S4_1                           | O75385 | ULK1    | 8408 unc-51 like autophagy activating kinase 1                              | 5450              |             | 100   | MRPrNRLrDPLDSEV    | 0.203584 | 0.37061  | 0.354312 | 0.094048 | 0.147621 | 0.076332 | 0.106001 | 0.309502 | 0.342487 | 0.975004 | 0.023798 | -1.54588 |
| O75385_nRtLPDLSEVrPFGHGLrPGLrGPEDPk_T3_1         | O75385 | ULK1    | 8408 unc-51 like autophagy activating kinase 1                              | 7660              |             |       | DKNrANrLSSrLKKYr_K | 0.201661 | 0.170753 | 0.194763 | 0.128233 | 0.118738 | 0.129014 | 0.125328 | 0.189509 | 0.662905 | 0.221158 | 0.003032 | -0.59313 |
| O75396_aNnLSSk_S5_S6_1                           | O75396 | SEC22B  | 9554 SEC22 homolog B, vesicle trafficking protein                           | 5174.5175         | 50:50       | 99.35 | ANrANrLSSkLYrQDA   | 0.161683 | 0.146708 | 0.147068 | 0.094718 | 0.108941 | 0.101605 | 0.101755 | 0.158159 | 0.670235 | 0.81871  | 0.010457 | -0.57726 |
| O75396_aNnLSSk_S8_1                              | O75396 | SEC22B  | 9554 SEC22 homolog B, vesicle trafficking protein                           | 5177              |             | 100   | CARNrLGSINrTELQD   | 0.144047 | 0.165952 | 0.165333 | 0.085881 | 0.113155 | 0.095308 | 0.098115 | 0.155511 | 0.63092  | 0.772465 | 0.00598  | -0.66447 |
| O75396_nLGSINrTELQVQR_S4_1                       | O75396 | SEC22B  | 9554 SEC22 homolog B, vesicle trafficking protein                           | 5137              |             | 100   | CARNrLGSINrTELQD   | 0.176471 | 0.199914 | 0.181947 | 0.080711 | 0.112913 | 0.124279 | 0.105968 | 0.18611  | 0.569381 | 0.454962 | 0.006492 | -0.81253 |
| O75396_nLGSINrTELQVQR_S5_1                       | O75396 | SEC22B  | 9554 SEC22 homolog B, vesicle trafficking protein                           | 5137              |             | 99.91 | PMrSRLSVrDPSrGL    | 0.246249 | 0.27595  | 0.279388 | 0.12705  | 0.138298 | 0.104948 | 0.123432 | 0.266862 | 0.462531 | 0.946883 | 0.003046 | -1.11238 |
| O75420_slvPDSGr_S3_1                             | O75420 | G1YF1   | 64599 GRB10 interacting GYF protein 1                                       | 5638              |             |       | ALrGLDAPrSRPpSfPc  | 0.374494 | 0.446008 | 0.393136 | 0.180111 | 0.209065 | 0.095373 | 0.161513 | 0.404362 | 0.399254 | 0.56552  | 0.008005 | -1.32462 |
| O75427_gSALGDAPrSRPpSfPcPAEDrLrPFGHR_S10_S14_S16 | O75427 | LRCH4   | 4034 leucine rich repeats and calponin homology domain cont: 5275.5279      | 99.95;87.41       |             |       | ALrGLDAPrSRPpSfPc  | 0.376494 | 0.390727 | 0.329026 | 0.137066 | 0.212307 | 0.080621 | 0.143331 | 0.365416 | 0.392242 | 0.385985 | 0.006282 | -1.35018 |
| O75427_gSALGDAPrSRPpSfPcPAEDrLrPFGHR_S10_S14_S16 | O75427 | LRCH4   | 4034 leucine rich repeats and calponin homology domain cont: 5275.5279.5281 | 99.88;50.06;50.06 |             | 89.37 | PSrPpSfPcPAEDrL    | 0.181669 | 0.304526 | 0.225482 | 0.074618 | 0.126285 | 0.083031 | 0.094645 | 0.237233 | 0.339893 | 0.306624 | 0.02719  | -1.32571 |
| O75427_gSALGDAPrSRPpSfPcPAEDrLrPFGHR_S16_1       | O75427 | LRCH4   | 4034 leucine rich repeats and calponin homology domain cont: 5281           | 5742              |             | 99.96 | QSGrPpSfPcPAEDrL   | 0.175006 | 0.189438 | 0.152995 | 0.094486 | 0.135508 | 0.123808 | 0.117934 | 0.127646 | 0.683096 | 0.861845 | 0.027713 | -1.54984 |
| O75427_sSQSGrPpSfPcPAEDrLrPFGHR_S11_1            | O75427 | LRCH4   | 4034 leucine rich repeats and calponin homology domain cont: 5511           | 5742              |             | 86.73 | FLrPpSfPcPAEDrL    | 0.214032 | 0.223715 | 0.170522 | 0.097525 | 0.117089 | 0.094785 | 0.103133 | 0.207556 | 0.508654 | 0.311271 | 0.00040  | -0.97524 |
| O75427_sSQSGrPpSfPcPAEDrLrPFGHR_S11_1            | O75427 | LRCH4   | 4034 leucine rich repeats and calponin homology domain cont: 5523           | 5742              |             | 93.84 | KEGrNrvYSSrRvDDY   | 0.17135  | 0.201247 | 0.223238 | 0.080526 | 0.123404 | 0.073215 | 0.092382 | 0.200612 | 0.4605   | 0.83483  | 0.001682 | -1.11873 |
| O75494_nYvSSr_S4_1                               | O75494 | SRSF10  | 10772 serine and arginine rich splicing factor 10                           | 5106              |             |       | KEGrNrvYSSrRvDDY   | 0.214452 | 0.187186 | 0.155341 | 0.083026 | 0.106155 | 0.089871 | 0.185646 | 0.484098 | 0.913322 | 0.124242 | 0.04663  | -1.06633 |
| O75494_nYvSSrYDvDvDR_S4_S5_1                     | O75494 | SRSF10  | 10772 serine and arginine rich splicing factor 10                           | 5105              | 45.39;45.39 | 90.52 | AEGrNrvYSSrRvDDY   | 0.211077 | 0.219389 | 0.171208 | 0.10554  | 0.130822 | 0.062689 | 0.099684 | 0.200558 | 0.497031 | 0.717291 | 0.105316 | -1.00859 |
| O75494_nYvSSrYDvDvDR_Y3_1                        | O75494 | SRSF10  | 10772 serine and arginine rich splicing factor 10                           | 5105              |             | 100   | GKErNrvYSSrRvDDY   | 0.211077 | 0.219389 | 0.171208 | 0.10554  | 0.130822 | 0.062689 | 0.099684 | 0.200558 | 0.497031 | 0.717291 | 0.105316 | -1.00859 |
| O75592_apsPHVYKINrLHSEVVECTsSTLk_S3_1            | O75592 | MYCBP2  | 23077 MYC binding protein 2, E3 ubiquitin protein ligase                    | 52920             |             | 76.2  | DEMrvLrSTvFvPvPv   | 0.178245 | 0.219174 | 0.234373 | 0.136381 | 0.113225 | 0.124095 | 0.124657 | 0.210058 | 0.591495 | 0.274767 | 0.006856 | -0.75756 |
| O75592_apsPHVYKINrLHSEVVECTsSTLk_S3_1            | O75592 | MYCBP2  | 23077 MYC binding protein 2, E3 ubiquitin protein ligase                    | 53424             |             | 99.72 | TVFrQrVrSvVvVvSE   | 0.193106 | 0.223679 | 0.177269 | 0.129071 | 0.162661 | 0.134598 | 0.14211  | 0.198018 | 0.717663 | 0.660442 | 0.031008 | -0.47862 |
| O75592_sTVSPvPvYVrPvDvASvNvVvPEESNmK_S1_1        | O75592 | MYCBP2  | 23077 MYC binding protein 2, E3 ubiquitin protein ligase                    | 534               |             |       |                    |          |          |          |          |          |          |          |          |          |          |          |          |

|                                                   |        |          |                                                            |                    |                                     |       |                      |          |          |          |          |          |          |          |          |          |          |          |          |
|---------------------------------------------------|--------|----------|------------------------------------------------------------|--------------------|-------------------------------------|-------|----------------------|----------|----------|----------|----------|----------|----------|----------|----------|----------|----------|----------|----------|
| O95835_sNFNNPLGNR_S3_1                            | O95835 | LATS1    | 9113 large tumor suppressor kinase 1                       | 5464               | 50:50                               | 93.46 | NIPVRSNSFNPLGN       | 0.17676  | 0.177297 | 0.209661 | 0.109335 | 0.160231 | 0.102265 | 0.123944 | 0.187906 | 0.659605 | 0.524005 | 0.039569 | -0.60032 |
| O95983_rVDSNSQVKS_S5_6                            | O95983 | MBD3     | 53615 methyL-CpG binding domain protein 3                  | 585,586            |                                     |       | RQVRVYDSNSQVKGK_QR   | 0.160898 | 0.205565 | 0.214708 | 0.053943 | 0.094816 | 0.095631 | 0.081463 | 0.193723 | 0.420514 | 0.813313 | 0.006508 | -1.24977 |
| O96017_KFDLLSEENSTALPQVLAQPSIR_S23_1              | O96017 | CHEK2    | 11200 checkpoint kinase 2                                  | 5516               |                                     | 85.57 | PQVLRAQPSIRKRRFR     | 0.248512 | 0.232756 | 0.244159 | 0.101378 | 0.093085 | 0.105813 | 0.100092 | 0.191409 | 0.413993 | 0.773388 | 1.9E-05  | -1.27254 |
| O96028_nRAsTAAASGAFKS_S4_T5_1                     | O96028 | NSD2     | 7468 nuclear receptor binding SET domain protein 2         | 5604,7605          | 50:50                               |       | LKLRNRSATSSSAL_RKI   | 0.249277 | 0.209134 | 0.191114 | 0.093595 | 0.098571 | 0.099244 | 0.097137 | 0.216508 | 0.448652 | 0.02125  | 0.019216 | -1.15633 |
| P00338_dQLVNEKIQTPQNK_S1_S2_1                     | P00338 | LDHA     | 3939 lactate dehydrogenase A                               | Y10                |                                     |       | TLKQQLIYNLKEEQE      | 0.147632 | 0.192137 | 0.211483 | 0.082193 | 0.098487 | 0.094641 | 0.091774 | 0.183508 | 0.449447 | 0.12676  | 0.002947 | -1.0016  |
| P01584_dSQQKSLVMSGYPYELK_S6_1                     | P01584 | IL1B     | 3553 interleukin 1 beta                                    | S133               |                                     |       | LRPQKSLVMSGYP        | 0.220354 | 0.197775 | 0.205185 | 0.126387 | 0.107905 | 0.101089 | 0.111294 | 0.207771 | 0.538061 | 0.872057 | 0.000675 | -0.89416 |
| P04792_IATQSNETIPVTFESR_T3_1                      | P04792 | HSPB1    | 3315 heat shock protein family B                           | T174,5176          | 50:50                               |       | APMKPLATQSNETI_I_MFI | 0.205555 | 0.202058 | 0.163389 | 0.111958 | 0.146482 | 0.144754 | 0.134398 | 0.190343 | 0.706116 | 0.817314 | 0.033412 | -0.50202 |
| P04792_IATQSNETIPVTFESR_T3_S5_1                   | P04792 | HSPB1    | 3315 heat shock protein family B                           | S82                |                                     | 95.07 | RALSRGLSSGSI         | 0.162404 | 0.189964 | 0.158962 | 0.08215  | 0.133229 | 0.111817 | 0.109605 | 0.170434 | 0.639893 | 0.610011 | 0.239332 | -0.6441  |
| P04792_vSLDYNHFAPDELTKV_S2_1                      | P04792 | HSPB1    | 3315 heat shock protein family B                           | S98                |                                     |       | TADRRVSLDYNHFA       | 0.169056 | 0.224941 | 0.220096 | 0.069714 | 0.148199 | 0.06785  | 0.092524 | 0.240698 | 0.465342 | 0.626177 | 0.026638 | -1.10364 |
| P04792_wRVSLDYNHFAPDELTKV_S4_1                    | P04792 | HSPB1    | 3315 heat shock protein family B                           | S98                |                                     |       | TADRRVSLDYNHFA       | 0.230637 | 0.199223 | 0.199853 | 0.134171 | 0.150813 | 0.134811 | 0.139932 | 0.209904 | 0.666646 | 0.432203 | 0.003941 | -0.58501 |
| P05187_hVPDSGATATAYLGVK_S5_1                      | P05187 | ALPP     | 250 alkaline phosphatase, placental                        | S114               |                                     |       | VDKHVPDSGATATAY      | 0.163487 | 0.159221 | 0.155428 | 0.094296 | 0.12477  | 0.108289 | 0.109119 | 0.159379 | 0.684649 | 0.130602 | 0.005268 | -0.54656 |
| P05187_hVPDSGATATAYLGVK_S5_T10_1                  | P05187 | ALPP     | 250 alkaline phosphatase, placental                        | S114,1117,1119     | 33:32,33:32,33:32                   |       | VDKHVPDSGATATAY_HVI  | 0.144922 | 0.184724 | 0.146259 | 0.050116 | 0.087795 | 0.055252 | 0.064388 | 0.158635 | 0.405887 | 0.89938  | 0.005857 | -1.30085 |
| P05187_tvNDKHPVDSGATATAYLGVK_S11_1                | P05187 | ALPP     | 250 alkaline phosphatase, placental                        | S114               |                                     |       | VDKHVPDSGATATAY      | 0.195696 | 0.16423  | 0.175569 | 0.125195 | 0.114523 | 0.157572 | 0.13243  | 0.178498 | 0.741913 | 0.671406 | 0.044074 | -0.43068 |
| P05204_IAsKAPPKPEPKK_S2_1                         | P05204 | HMG2     | 3151 high mobility group nucleosomal binding domain 2      | S29                |                                     |       | KRRSARLSAKPAPPK      | 0.329595 | 0.273744 | 0.224861 | 0.085875 | 0.056371 | 0.050356 | 0.064201 | 0.276066 | 0.232556 | 0.23256  | 0.002758 | -2.10435 |
| P05412_nSDLLTSPDVLGK_S7_1                         | P05412 | JUN      | 3725 Jun proto-oncogene, AP-1 transcription factor subunit | S63                |                                     |       | KNSDLLTSPDVLGK       | 0.269599 | 0.300228 | 0.178424 | 0.073735 | 0.089782 | 0.058165 | 0.083894 | 0.249417 | 0.296268 | 0.117218 | 0.009622 | -1.75503 |
| P05455_sPKPLPEVDYK_S1_S3_1                        | P05455 | SSB      | 6741 Sjogren syndrome antigen B                            | 592,594            | 50:50                               |       | DKTKIRRSFPKLVFN_TK   | 0.114731 | 0.125284 | 0.116693 | 0.083739 | 0.097649 | 0.086482 | 0.08929  | 0.118903 | 0.750952 | 0.734446 | 0.005198 | -0.41321 |
| P06400_KSLDEEVIWPHVPVR_T15_1                      | P06400 | RB1      | 5925 RB transcriptional corepressor 1                      | T373               |                                     |       | VNVIPHTPVNATV        | 0.210477 | 0.192432 | 0.216008 | 0.149431 | 0.121675 | 0.144719 | 0.138608 | 0.206306 | 0.671859 | 0.815897 | 0.003711 | -0.57377 |
| P06400_vNsTANAEQATSAQTQKPLK_S3_1                  | P06400 | RB1      | 5925 RB transcriptional corepressor 1                      | S624               |                                     | 90.66 | GSTRVNSTANAEQ        | 0.216191 | 0.220125 | 0.17591  | 0.069946 | 0.095653 | 0.092797 | 0.086132 | 0.204075 | 0.422059 | 0.497948 | 0.019137 | -1.24448 |
| P06400_vNsTANAEQATSAQTQKPLK_S3_T4_1               | P06400 | RB1      | 5925 RB transcriptional corepressor 1                      | S624,7625          | 50:50                               |       | GSTRVNSTANAEQ_ST     | 0.19053  | 0.237032 | 0.199868 | 0.032612 | 0.05672  | 0.045974 | 0.045102 | 0.299667 | 0.21573  | 0.386273 | 0.000495 | -2.2127  |
| P06748_dELHIVEAAEMNYESGPIKVLATLK_S16_1            | P06748 | NPM1     | 4869 nucleophosmin                                         | S70                |                                     | 77.24 | EAMNYESGPIKVLTA      | 0.166521 | 0.203391 | 0.229835 | 0.134062 | 0.096607 | 0.084465 | 0.105045 | 0.190196 | 0.525444 | 0.75867  | 0.016002 | -0.92839 |
| P06748_dELHIVEAAEMNYESGPIKVLATLK_S16_T21_1        | P06748 | NPM1     | 4869 nucleophosmin                                         | S70,775            | 39:71,39:71                         |       | EAMNYESGPIKVLTA      | 0.197279 | 0.205103 | 0.275847 | 0.170739 | 0.098839 | 0.093974 | 0.121184 | 0.226077 | 0.53603  | 0.993156 | 0.400603 | -0.89961 |
| P06748_dELHIVEAAEMNYESGPIKVLATLK_S16_T16_1        | P06748 | NPM1     | 4869 nucleophosmin                                         | Y67,570            | 49:09,49:09                         |       | EAMNYESGPIKVLTA      | 0.180766 | 0.216008 | 0.229609 | 0.161064 | 0.141638 | 0.087564 | 0.130809 | 0.20674  | 0.623136 | 0.610901 | 0.044868 | -0.68238 |
| P07204_cAAsKENVLVQHV_S1_1                         | P07204 | THBD     | 7056 thrombospondin                                        | S559               |                                     |       | EYKCAAsKENVLVQH      | 0.112819 | 0.133063 | 0.104861 | 0.092364 | 0.087402 | 0.077911 | 0.085892 | 0.116914 | 0.734659 | 0.406489 | 0.299972 | -0.44485 |
| P07949_rPDSMENVQSVDAFK_S1_1                       | P07949 | RET      | 5979 ret proto-oncogene                                    | S698               |                                     | 96.25 | ARRPDSMENVQSV        | 0.190173 | 0.183823 | 0.154671 | 0.117174 | 0.1228   | 0.121012 | 0.120329 | 0.170319 | 0.680498 | 0.050247 | 0.005708 | -0.55534 |
| P08047_sSSTSSSTGGGQESQSPALLAATCSR_S1_S2_S3_P08047 | P08047 | SP1      | 6667 Sp1 transcription factor                              | S40,541,542,743,54 | 12:33,12:33,12:33,12:33,12:33,12:33 |       | QAQTSSTSSSTSSS       | 0.204411 | 0.180957 | 0.224048 | 0.127651 | 0.163745 | 0.130001 | 0.104065 | 0.203139 | 0.691476 | 0.934031 | 0.021326 | -0.53225 |
| P08047_vSGLQSDALINQINQISGSLQAGQQK_S21_1           | P08047 | SP1      | 6667 Sp1 transcription factor                              | S379               |                                     | 99.97 | GFQTSGLQAGQQK        | 0.200517 | 0.190171 | 0.164149 | 0.104619 | 0.11073  | 0.109502 | 0.108283 | 0.203139 | 0.533725 | 0.114085 | 0.002067 | -0.90583 |
| P08559_yHGHMSDPGVSR_S2_1                          | P08559 | PDHAI1   | 5160 pyruvate dehydrogenase E1 subunit alpha 1             | S293,5295          | 45:72,45:72                         |       | TYRVGHMSDPGVSR_RVI   | 0.230024 | 0.257779 | 0.227551 | 0.159699 | 0.186892 | 0.153117 | 0.16657  | 0.238452 | 0.698547 | 0.935418 | 0.007114 | -0.51757 |
| P08567_sIRLPETLDLGLYSmkDTEK_S1_1                  | P08567 | PLEK     | 5341 pleckstrin                                            | S119               |                                     | 100   | DKTKIRRSFPKLVFN      | 0.188252 | 0.215716 | 0.126063 | 0.104904 | 0.102659 | 0.109586 | 0.105716 | 0.21663  | 0.560304 | 0.031416 | 0.012194 | -0.83572 |
| P08621_yDERPGRPLHR_S8_1                           | P08621 | SNRNP70  | 6625 small nuclear ribonucleoprotein U1 subunit 70         | S226               |                                     |       | YDGRPGRPLHRD         | 0.141216 | 0.190666 | 0.207062 | 0.070469 | 0.119521 | 0.077697 | 0.089229 | 0.179648 | 0.496688 | 0.747526 | 0.222446 | -1.00959 |
| P09601_qRAsNKVDQSAVETPR_S4_1                      | P09601 | HMOX1    | 3162 heme oxygenase 1                                      | S1377              |                                     |       | PKQRASNKVDQSA        | 0.16377  | 0.141028 | 0.151874 | 0.120819 | 0.088274 | 0.116312 | 0.108468 | 0.152224 | 0.712559 | 0.587699 | 0.022256 | -0.48892 |
| P09622_eANLAASGKISNF_S1_1                         | P09622 | DLD      | 1738 dihydropyrimidine dehydrogenase                       | S176               |                                     |       | LAAsGKISNF           | 0.256777 | 0.239028 | 0.197008 | 0.140387 | 0.131832 | 0.071939 | 0.114719 | 0.224937 | 0.510005 | 0.911535 | 0.025919 | -0.97142 |
| P09661_sKTFMGAGLPTDK_S1_1                         | P09661 | SNRPA1   | 6627 small nuclear ribonucleoprotein polypeptide A'        | S508               |                                     |       | AKDIAKRRSKTNPFGA     | 0.165877 | 0.193699 | 0.183722 | 0.119073 | 0.111047 | 0.108762 | 0.112611 | 0.180836 | 0.668787 | 0.24532  | 0.00619  | -0.67886 |
| POC126_rTPAPPGPAPGEGPSGR_S10_1                    | POC126 | TFT      | 29844 TCF3 fusion partner                                  | S180               |                                     |       | PAPEPAGPAPGEGP       | 0.184541 | 0.222762 | 0.177207 | 0.111898 | 0.136143 | 0.148769 | 0.13227  | 0.194837 | 0.739643 | 0.739643 | 0.024517 | -0.55878 |
| POC640_sSScNLGSSLSGFATVATGGR_S1_S2_1              | POC640 | SP9      | 100131390 Sp9 transcription factor                         | S53,554            | 47:35,47:35                         |       | GFHFWKSScNLGSS       | 0.185416 | 0.452845 | 0.358285 | 0.084096 | 0.1133   | 0.103885 | 0.100427 | 0.399442 | 0.254283 | 0.154041 | 0.006896 | -1.97549 |
| POC640_sSScNLGSSLSGFATVATGGR_S3_1                 | POC640 | SP9      | 100131390 Sp9 transcription factor                         | S55                |                                     | 91.43 | HPWKRSScNLGSS        | 0.356667 | 0.431878 | 0.280711 | 0.105716 | 0.122703 | 0.075453 | 0.101291 | 0.356219 | 0.28435  | 0.182262 | 0.005092 | -1.81426 |
| P10244_gELIPSPSEVSGSIPVPSV_S7_T19_2               | P10244 | MYBL2    | 4605 MYB proto-oncogene like 2                             | S393,7405          | 82:92,85:16                         |       | RKELIPSPSEVSGV       | 0.172368 | 0.149972 | 0.205213 | 0.130255 | 0.107616 | 0.119766 | 0.119212 | 0.175838 | 0.677966 | 0.285008 | 0.038036 | -0.56072 |
| P10398_gSDGTGRGSPASVSGR_S10_1                     | P10398 | ARAF     | 369 A-Raf proto-oncogene, serine/threonine kinase          | S257               |                                     | 99.99 | SDGTGRGSPASV         | 0.167612 | 0.185763 | 0.201372 | 0.090385 | 0.100374 | 0.119304 | 0.103354 | 0.184911 | 0.558925 | 0.860655 | 0.003225 | -0.83927 |
| P10398_qQYVHSVQDLSGSR_S11_1                       | P10398 | ARAF     | 369 A-Raf proto-oncogene, serine/threonine kinase          | S157               |                                     | 91.82 | QYVHSVQDLSGSR        | 0.164269 | 0.164389 | 0.180535 | 0.105987 | 0.121624 | 0.126499 | 0.118037 | 0.169531 | 0.695435 | 0.860591 | 0.032057 | -0.52401 |
| P10398_qQYVHSVQDLSGSR_S6_1                        | P10398 | ARAF     | 369 A-Raf proto-oncogene, serine/threonine kinase          | S157               |                                     | 97.42 | QYVHSVQDLSGSR        | 0.333495 | 0.337058 | 0.243986 | 0.153446 | 0.153563 | 0.123362 | 0.143457 | 0.304847 | 0.470588 | 0.196406 | 0.073151 | -1.08746 |
| P10398_sTSPNVHMVSTTAPMDSNLQLTGQSFSDAAGSR_P10398   | P10398 | ARAF     | 369 A-Raf proto-oncogene, serine/threonine kinase          | S222               |                                     |       | APLQQRSTSPNVHMV      | 0.212434 | 0.190342 | 0.198004 | 0.133506 | 0.117835 | 0.138775 | 0.130039 | 0.183677 | 0.702720 | 0.504005 | 0.018752 | -0.49979 |
| P10398_sTSPNVHMVSTTAPMDSNLQLTGQSFSDAAGSR_P10398   | P10398 | ARAF     | 369 A-Raf proto-oncogene, serine/threonine kinase          | S222               |                                     | 53.93 | TSPNVHMVSTTAPMDS     | 0.15942  | 0.173686 | 0.210853 | 0.132647 | 0.12975  | 0.118266 | 0.126887 | 0.18132  | 0.6998   | 0.15166  | 0.02963  | -0.51499 |
| P10398_sTSPNVHMVSTTAPMDSNLQLTGQSFSDAAGSR_P10398   | P10398 | ARAF     | 369 A-Raf proto-oncogene, serine/threonine kinase          | T215               |                                     | 67.14 | TRKSTSPNVHMV         | 0.173368 | 0.209799 | 0.199671 | 0.086206 | 0.139725 | 0.123237 | 0.116389 | 0.194279 | 0.599082 | 0.640087 | 0.015645 | -0.73918 |
| P10412_gTGAASGK_S5_1                              | P10412 | HIST1H1E | 3008 histone cluster 1 H1 family member e                  | S102               |                                     | 95.55 | GTKTGASGPKLKN        | 0.133976 | 0.152327 | 0.153905 | 0.08611  | 0.127193 | 0.098242 | 0.103848 | 0.146736 | 0.707723 | 0.431975 | 0.035661 | -0.49874 |
| P10412_kAsGPPVELTK_S1_1                           | P10412 | HIST1H1E | 3008 histone cluster 1 H1 family member e                  | S36                |                                     | 88.57 | ASKRASGPPVEL         | 0.113748 | 0.159059 | 0.134235 | 0.102061 | 0.105922 | 0.079067 | 0.135681 | 0.582739 | 0.950395 | 0.351558 | 0.007908 | -0.77908 |
| P11171_sLDGAASDASDRSPRSPAPATQGGVAEGVLDAAS_P11171  | P11171 | EPB41    | 2035 erythrocyte membrane protein band 4.1                 | S542               |                                     |       | ASKRASGPPVEL         | 0.150113 |          |          |          |          |          |          |          |          |          |          |          |

|                                      |        |         |                                                               |                   |                         |                   |          |          |          |          |          |          |          |          |          |          |          |          |          |
|--------------------------------------|--------|---------|---------------------------------------------------------------|-------------------|-------------------------|-------------------|----------|----------|----------|----------|----------|----------|----------|----------|----------|----------|----------|----------|----------|
| P16949_eSVPEPFLsPpkk_S9_1            | P16949 | STMN1   | 3925 stathmin 1                                               | 538               | 100                     | SVPEPFLSPFKKDDL   | 0.165326 | 0.209506 | 0.222891 | 0.049845 | 0.1021   | 0.044962 | 0.065636 | 0.199241 | 0.329428 | 0.949868 | 0.006112 | -1.60197 |          |
| P16949_eSVEPFLsPpkk_S9_1             | P16949 | STMN1   | 3925 stathmin 1                                               | 538               | 100                     | SVPEPFLSPFKKDDL   | 0.19766  | 0.23917  | 0.22957  | 0.072865 | 0.093442 | 0.07676  | 0.081022 | 0.222133 | 0.364747 | 0.403837 | 0.000552 | -1.45503 |          |
| P16949_rASGQAFELILSPR_S12_1          | P16949 | STMN1   | 3925 stathmin 1                                               | 525               | 100                     | QAFELILSPFKKRDV   | 0.242095 | 0.253344 | 0.27563  | 0.038577 | 0.087105 | 0.079536 | 0.068406 | 0.227603 | 0.266102 | 0.60237  | 0.004072 | -1.90995 |          |
| P16949_rASGQAFELILSPR_S3_1           | P16949 | STMN1   | 3925 stathmin 1                                               | 516               | 100                     | KLEKSGQAFELILSPR  | 0.261287 | 0.183525 | 0.307994 | 0.069899 | 0.095027 | 0.104707 | 0.089878 | 0.250935 | 0.358171 | 0.150966 | 0.012993 | -1.48128 |          |
| P16949_ksEVPFELsPpkk_S1_1            | P16949 | STMN1   | 3925 stathmin 1                                               | 528               | 99.6                    | ELILSPRSEKSVPEFL  | 0.257844 | 0.199114 | 0.239845 | 0.115922 | 0.109434 | 0.08944  | 0.104932 | 0.232534 | 0.451254 | 0.356251 | 0.0025   | -1.41799 |          |
| P16949_ksEVPFELsPpkk_S1_S4_1         | P16949 | STMN1   | 3925 stathmin 1                                               | 528.S3.S1         | 50:50                   | ELILSPRSEKSVPEFL  | 0.253491 | 0.186899 | 0.283622 | 0.063553 | 0.088086 | 0.062005 | 0.071215 | 0.241337 | 0.295085 | 0.160742 | 0.004654 | -1.7608  |          |
| P16949_ksEVPFELsPpkk_S11_1           | P16949 | STMN1   | 3925 stathmin 1                                               | 538               | 100                     | SVPEPFLSPFKKDDL   | 0.191777 | 0.117974 | 0.223273 | 0.077948 | 0.093469 | 0.09623  | 0.089216 | 0.172675 | 0.505131 | 0.06436  | 0.049371 | -0.99386 |          |
| P16949_ksEVPFELsPpkk_S11_1           | P16949 | STMN1   | 3925 stathmin 1                                               | 528               | 100                     | SVPEPFLSPFKKDDL   | 0.157758 | 0.168638 | 0.200358 | 0.100439 | 0.136172 | 0.083819 | 0.10681  | 0.175885 | 0.60881  | 0.812712 | 0.026516 | -0.71712 |          |
| P17029_aLPAAHIPAPHPGPR_S15_1         | P17029 | ZKSCAN1 | 7586 zinc finger with KRAB and SCAN domains 1                 | 5208              | 100                     | PAFHGGSPFDDQAMA   | 0.158773 | 0.169592 | 0.17299  | 0.100307 | 0.105432 | 0.094987 | 0.100242 | 0.167118 | 0.599826 | 0.662097 | 0.000217 | -0.73738 |          |
| P17029_sFSLSNFTPEEVPVTGTk_S1_S3_1    | P17029 | ZKSCAN1 | 7586 zinc finger with KRAB and SCAN domains 1                 | 5357.S359         | 50:50                   | KGKGLGRSFFLSNSFL  | 0.16536  | 0.171033 | 0.15146  | 0.063514 | 0.070582 | 0.089648 | 0.074581 | 0.162618 | 0.458629 | 0.713795 | 0.000828 | -1.1246  |          |
| P17029_sFSLSNFTPEEVPVTGTk_S1_S5_1    | P17029 | ZKSCAN1 | 7586 zinc finger with KRAB and SCAN domains 1                 | 5357.S359.S361    | 33.33,33.33,33.33       | KGKGLGRSFFLSNSFL  | 0.272212 | 0.229006 | 0.16667  | 0.064765 | 0.08071  | 0.066516 | 0.070664 | 0.222629 | 0.317405 | 0.055289 | 0.008075 | -1.6556  |          |
| P17096_kQPPVsPGTALVGSQk_S6_1         | P17096 | HMGAI   | 3159 high mobility group AT-hook 1                            | 536               | 100                     | PRKQPPVSPGTALVGV  | 0.176547 | 0.17641  | 0.167547 | 0.096725 | 0.124688 | 0.093615 | 0.105009 | 0.173501 | 0.605238 | 0.166506 | 0.002674 | -0.72443 |          |
| P17096_kQPPVsPGTALVGSQk_S6_T9_1      | P17096 | HMGAI   | 3159 high mobility group AT-hook 1                            | 536.T39           | 50:50                   | PRKQPPVSPGTALVGV  | 0.180886 | 0.187146 | 0.16534  | 0.121162 | 0.129012 | 0.087847 | 0.112674 | 0.177784 | 0.663767 | 0.418248 | 0.010117 | -0.65798 |          |
| P17096_kQPPVsPGTALVGSQkEPSEVPk_T23_1 | P17096 | HMGAI   | 3159 high mobility group AT-hook 1                            | T53               | 100                     | KEPSEVPTPKRPRGR   | 0.154486 | 0.17073  | 0.151608 | 0.101387 | 0.111593 | 0.095223 | 0.102734 | 0.158941 | 0.646366 | 0.782698 | 0.00181  | -0.62958 |          |
| P17096_qPVPSPGTALVGSQkEPSEVPk_S13_1  | P17096 | HMGAI   | 3159 high mobility group AT-hook 1                            | 544               | 100                     | PTALVGSQkEPSEVPE  | 0.148604 | 0.149628 | 0.216994 | 0.078094 | 0.081435 | 0.065534 | 0.075021 | 0.171742 | 0.436824 | 0.087514 | 0.01392  | -1.19488 |          |
| P17980_KMNVsDvNVEELAR_S5_1           | P17980 | PSMC3   | 5702 proteasome 26S subunit, ATPase 3                         | 5376              | 99.92                   | HSRKMVSDvNVEELAR  | 0.151777 | 0.167192 | 0.15272  | 0.111716 | 0.139584 | 0.104023 | 0.118441 | 0.15723  | 0.753299 | 0.351585 | 0.031083 | -0.40871 |          |
| P18583_cvSvQTDPTDEIPTk_S3_1          | P18583 | SON     | 6651 SON DNA binding protein                                  | 5376              | 100                     | SRKRCVSDvNVEELAR  | 0.189707 | 0.195805 | 0.164452 | 0.076843 | 0.121277 | 0.10352  | 0.100546 | 0.183321 | 0.548471 | 0.711681 | 0.006769 | -0.86651 |          |
| P18615_sLYEVSsDRLR_S1_1              | P18615 | NELFE   | 7936 negative elongation factor complex member E              | 5131              | 99.99                   | SRKRCVSDvNVEELAR  | 0.191751 | 0.171821 | 0.13784  | 0.084369 | 0.100126 | 0.085338 | 0.089944 | 0.167136 | 0.538144 | 0.189971 | 0.009545 | -0.89394 |          |
| P18615_sLYEVSsDRLR_S9_1              | P18615 | NELFE   | 7936 negative elongation factor complex member E              | 5139              | 98.81                   | LYEVSsDRLR        | 0.197978 | 0.219718 | 0.239084 | 0.081089 | 0.132715 | 0.128548 | 0.114117 | 0.218928 | 0.512259 | 0.679149 | 0.006772 | -0.93993 |          |
| P19634_iPSAvsTVsMQNIHk_S3_S6_S9_2    | P19634 | SLC9A1  | 6548 solute carrier family 9 member A1                        | 5599.S602.S605    | 48.05,48.05,99.9        | GMGKPSFSAVSTVSM   | 0.23596  | 0.19943  | 0.220641 | 0.134186 | 0.100421 | 0.090944 | 0.108367 | 0.218677 | 0.495558 | 0.78157  | 0.008872 | -0.10287 |          |
| P19634_iPSAvsTVsMQNIHk_S3_S6_L7_S9_2 | P19634 | SLC9A1  | 6548 solute carrier family 9 member A1                        | 5599.S602.T603.S6 | 33.36,33.36,33.36,99.92 | GMGKPSFSAVSTVSM   | 0.264161 | 0.27283  | 0.301668 | 0.16336  | 0.124737 | 0.10738  | 0.131826 | 0.206319 | 0.471558 | 0.639084 | 0.00281  | -1.08449 |          |
| P19838_kLSTFSLTGASLLTK_S3_1          | P19838 | NFKB1   | 4790 nuclear factor kappa B subunit 1                         | 5937              | 99.94                   | STSFRLKSTFSLTSLTS | 0.184089 | 0.199998 | 0.171624 | 0.119907 | 0.130798 | 0.111847 | 0.120581 | 0.185237 | 0.650953 | 0.622692 | 0.003284 | -0.61937 |          |
| P19838_kLSTFSLTGASLLTK_S3_T5_S7_T9_1 | P19838 | NFKB1   | 4790 nuclear factor kappa B subunit 1                         | 5937.T939.S941.T9 | 24.32,24.32,24.32,24.32 | STSFRLKSTFSLTSLTS | 0.162108 | 0.205197 | 0.160476 | 0.116418 | 0.122172 | 0.110511 | 0.116367 | 0.179257 | 0.661451 | 0.100406 | 0.01626  | -0.59629 |          |
| P19878_aPGRQLsGQk_S8_1               | P19878 | NCF2    | 4688 neutrophil cytosolic factor 2                            | 5332              | 100                     | APGRQLSPGQKPESEV  | 0.153984 | 0.166771 | 0.167911 | 0.10787  | 0.145325 | 0.113671 | 0.122289 | 0.162889 | 0.750749 | 0.256509 | 0.031174 | -0.4136  |          |
| P19878_tPEIFR_T1_1                   | P19878 | NCF2    | 4688 neutrophil cytosolic factor 2                            | T323              | 100                     | EPFPRKPTPEIFR     | 0.228855 | 0.178631 | 0.161913 | 0.103835 | 0.129191 | 0.046654 | 0.092227 | 0.1898   | 0.491185 | 0.808866 | 0.03791  | -1.02566 |          |
| P20020_nskEANHGDFGTLAELR_S1_1        | P20020 | ATP2B1  | 490 ATPase plasma membrane Ca2+ transporting 1                | S17               | 100                     | AYSVGNLSKLANHSD   | 0.146998 | 0.129268 | 0.200842 | 0.080225 | 0.067013 | 0.094115 | 0.080451 | 0.159036 | 0.505866 | 0.235133 | 0.026491 | -0.98317 |          |
| P20592_nRySWLLQCSQk_S1_1             | P20592 | MX2     | 4600 MX dynamin like GTPase 2                                 | S676              | 95.06                   | LGALVGSQkEPSEVPE  | 0.163232 | 0.158045 | 0.129732 | 0.102706 | 0.122208 | 0.067974 | 0.097629 | 0.150373 | 0.604604 | 0.602212 | 0.049411 | -0.58912 |          |
| P20592_nRySWLLQCSQk_S1_1             | P20592 | MX2     | 4600 MX dynamin like GTPase 2                                 | S676              | 89.89                   | LGALVGSQkEPSEVPE  | 0.165416 | 0.171852 | 0.132871 | 0.07614  | 0.112152 | 0.093143 | 0.093812 | 0.156713 | 0.598621 | 0.852677 | 0.016835 | -0.74029 |          |
| P21359_kGSMVMSSEGNDTADVPk_S3_1       | P21359 | NF1     | 4763 neurofibromin 1                                          | 52543             | 100                     | PVSEKRSVMSSEGNDT  | 0.180825 | 0.195973 | 0.188473 | 0.10335  | 0.111169 | 0.114183 | 0.109567 | 0.182653 | 0.581496 | 0.705489 | 0.001131 | -0.78216 |          |
| P21359_kFDHLSDTk_S2_1                | P21359 | NF1     | 4763 neurofibromin 1                                          | S2543             | 100                     | KLLGTGRLSDPHLSDT  | 0.173358 | 0.151594 | 0.189187 | 0.122052 | 0.092103 | 0.122101 | 0.111786 | 0.17138  | 0.652268 | 0.898747 | 0.015372 | -0.61646 |          |
| P21359_ksmSLDMQPSQANTk_S4_1          | P21359 | NF1     | 4763 neurofibromin 1                                          | S2523             | 99.09                   | PRKRSKSLDMQPSQANT | 0.138895 | 0.132225 | 0.134016 | 0.094776 | 0.110605 | 0.093345 | 0.099575 | 0.135045 | 0.737347 | 0.229873 | 0.003803 | -0.43958 |          |
| P21796_ITFDSSFSPTNGk_S8_1            | P21796 | VDAC1   | 7416 voltage dependent anion channel 1                        | S104              | 99.36                   | ITFDSSFSPTNGk     | 0.13993  | 0.163107 | 0.141658 | 0.09273  | 0.117814 | 0.117708 | 0.109417 | 0.148232 | 0.738148 | 0.887804 | 0.025603 | -0.53802 |          |
| P22059_gATVAPLTPGNVGSgkDQcSGk_S15_1  | P22059 | OSBP    | 5007 oxysterol binding protein                                | S338              | 100                     | NTPGNVGSgkDQcSGK  | 0.192106 | 0.171894 | 0.208432 | 0.160513 | 0.12396  | 0.118649 | 0.134734 | 0.190821 | 0.704227 | 0.784134 | 0.226079 | -0.45089 |          |
| P22059_sLSELESkPAESNEk_S3_1          | P22059 | OSBP    | 5007 oxysterol binding protein                                | S290              | 99.09                   | TALNKSLSLESLESLK  | 0.187045 | 0.170308 | 0.194346 | 0.12558  | 0.140529 | 0.146718 | 0.137609 | 0.1839   | 0.748284 | 0.874969 | 0.008162 | -0.41834 |          |
| P22102_nGSLTNHFSFK_T5_1              | P22102 | GART    | 2618 phosphoribosylglycinamide formyltransferase, phosphor T5 | T748              | 99.09                   | TLKNGSLTNHFSFK    | 0.207681 | 0.195213 | 0.249206 | 0.123866 | 0.121525 | 0.121197 | 0.122196 | 0.211397 | 0.562165 | 0.802920 | 0.027903 | -0.83093 |          |
| P22681_eLNRHSLFSLPSQMEPRDPVR_S7_1    | P22681 | CBL     | 867 Cbl proto-oncogene                                        | 5619              | 100                     | RHLNRHSLFSLPSQME  | 0.202911 | 0.219472 | 0.199871 | 0.125078 | 0.112573 | 0.138284 | 0.125311 | 0.207418 | 0.604149 | 0.804674 | 0.010027 | -0.72702 |          |
| P22681_eLNRHSLFSLPSQMEPRDPVR_T3_S7_1 | P22681 | CBL     | 867 Cbl proto-oncogene                                        | 7615.S619         | 50:50                   | RHLNRHSLFSLPSQME  | 0.187978 | 0.191151 | 0.175628 | 0.083931 | 0.114545 | 0.090196 | 0.096224 | 0.162151 | 0.735253 | 0.554532 | 0.852174 | 0.005678 | -0.85066 |
| P23396_kPLPDHVSIVPEKDELPTTPISEK_S8_1 | P23396 | RPS3    | 6188 ribosomal protein S3                                     | S209              | 100                     | KPLPDHVSIVPEKDEL  | 0.150892 | 0.1745   | 0.168283 | 0.120787 | 0.105203 | 0.112738 | 0.112909 | 0.164558 | 0.686135 | 0.577178 | 0.030511 | -0.54344 |          |
| P23497_gFENVHDKLPQESEEEEER_S15_1     | P23497 | SP100   | 6672 SP100 nuclear antigen                                    | 5157              | 100                     | KLPLDHSIVPEKDEE   | 0.197263 | 0.188552 | 0.192807 | 0.099442 | 0.115917 | 0.06082  | 0.09206  | 0.129874 | 0.477304 | 0.046352 | 0.020216 | -0.67072 |          |
| P23634_sIHSMTHPEFAIEELPR_S1_1        | P23634 | ATP2B4  | 493 ATPase plasma membrane Ca2+ transporting 4                | S1162             | 99.51                   | QKPYNKS IHSMTHPE  | 0.179625 | 0.140279 | 0.206677 | 0.111406 | 0.081992 | 0.097524 | 0.096974 | 0.174627 | 0.555319 | 0.327418 | 0.020867 | -0.84861 |          |
| P23634_sIHSMTHPEFAIEELPR_S4_1        | P23634 | ATP2B4  | 493 ATPase plasma membrane Ca2+ transporting 4                | S1162.S1165       | 49.75,49.75             | QKPYNKS IHSMTHPE  | 0.199951 | 0.204738 | 0.271402 | 0.119892 | 0.160104 | 0.141222 | 0.104604 | 0.225634 | 0.623019 | 0.404721 | 0.032007 | -0.68265 |          |
| P25054_rsAAHTHSNYFNk_S2_S3_1         | P25054 | APC     | 324 APC, WNT signaling pathway regulator                      | 5295.S926         | 49.61,49.61             | RSAAHTHSNYFNK     | 0.268127 | 0.21251  | 0.207999 | 0.156016 | 0.095478 | 0.080117 | 0.110537 | 0.229545 | 0.481547 | 0.821091 | 0.016906 | -1.05425 |          |
| P25490_hQLVHKGKFCQTEGcGk_T6_1        | P25490 | YY1     | 7528 YY1 transcription factor                                 | T348              | 100                     | ERKLVHKGKFCQTEG   | 0.216457 | 0.242642 | 0.193535 | 0.075015 | 0.080486 | 0.052123 | 0.069208 | 0.217545 | 0.318131 | 0.544008 | 0.00474  | -1.65231 |          |
| P26368_eHESGLRSPR_S9_1               | P26368 | U2AF2   | 11338 U2 small nuclear RNA auxiliary factor 2                 | S109              | 100                     | HESGLRSPR         | 0.189764 | 0.163306 | 0.191244 | 0.136891 | 0.118409 | 0.148909 | 0.134737 | 0.181438 | 0.742604 | 0.97706  | 0.012105 | -0.42933 |          |
| P26373_nksTEGLQAVQR_S3_1             | P26373 | RPL13   | 5792 ribosomal protein L13                                    | 5796              | 89.65                   | DRGRNKRKSTESLQAN  | 0.18762  | 0.180329 | 0.180878 | 0.151577 | 0.121693 | 0.101812 | 0.125083 | 0.182943 | 0.687354 | 0.050816 | 0.017041 | -0.54845 |          |
| P28290_eASAsDVGKSESEFTQYTHHLK_S3_1   | P28290 | ITPRID2 | 6774 ITPR interacting domain containing 2                     | 5641              | 87.64                   | HLKRSAsDVGKSESE   | 0.154532 | 0.190463 | 0.185469 | 0.109099 | 0.123148 | 0.145108 | 0.125785 | 0.176821 | 0.711367 | 0.93013  | 0.029333 | -0.49133 |          |
| P28290_sLAsiEK_S4_1                  | P28290 | ITPRID2 | 6774 ITPR interacting domain containing 2                     | 5668              | 100                     | HLLKRSAsDVGKSESE  | 0.171254 | 0.167759 | 0.176476 | 0.098505 | 0.119527 | 0.126153 | 0.114728 | 0.171829 | 0.667688 | 0.169097 | 0.00228  | -0.58275 |          |
| P29350_dLGDATLk_S3_1                 | P29350 | PTNP6   | 5777 protein tyrosine phosphatase, non-receptor type 6        | S10               | 100                     | RWFHRDLGSDATL     | 0.153958 | 0.139143 | 0.158172 | 0.100487 | 0.096258 | 0.11248  | 0.103075 | 0.148304 | 0.695023 | 0.950234 | 0.002519 | -0.52487 |          |
| P29353_hGSFVNKPTR_S3_1               | P29353 | SHC1    | 6464 SHC adaptor protein 1                                    | S139              | 100                     | EWTRHSLGSDATL     | 0.181825 | 0.174029 | 0.205079 | 0.090732 | 0.101329 | 0.067353 | 0.086472 | 0.186978 | 0.642469 | 0.926708 | 0.001838 | -1.11257 |          |
| P29374_sTLsNMVGLSK_S1_S4_S5_1        |        |         |                                                               |                   |                         |                   |          |          |          |          |          |          |          |          |          |          |          |          |          |

|                                                       |        |          |                                                          |                     |                         |  |       |                     |          |          |          |          |           |          |           |          |           |          |          |          |
|-------------------------------------------------------|--------|----------|----------------------------------------------------------|---------------------|-------------------------|--|-------|---------------------|----------|----------|----------|----------|-----------|----------|-----------|----------|-----------|----------|----------|----------|
| P38159_gHMDDGGYSMNFMSSrGLPvk_S18_1                    | P38159 | RBMX     | 27316 RNA binding motif protein, X-linked                | 5143                |                         |  | 80.53 | MNFNMSSSRGLPVK      | 0.242254 | 0.211884 | 0.182417 | 0.123038 | 0.101988  | 0.118772 | 0.114599  | 0.212185 | 0.540091  | 0.24303  | 0.006108 | -0.88872 |
| P38159_gHMDDGGYSMNFMSSrGLPvk_S16_S17_1                | P38159 | RBMX     | 27316 RNA binding motif protein, X-linked                | 5141.S142           | 47.31;47.31             |  |       | YSMFMNMSSSRGLPVK    | 0.229718 | 0.216854 | 0.169937 | 0.145226 | 0.129852  | 0.13451  | 0.13653   | 0.205503 | 0.664368  | 0.118118 | 0.021151 | -0.58995 |
| P38159_gRbDYSGGPPR_S4_1                               | P38159 | RBMX     | 27316 RNA binding motif protein, X-linked                | 5189                |                         |  | 92.07 | PVSRGRDYSGGPPRR     | 0.144384 | 0.141732 | 0.166691 | 0.121679 | 0.1082319 | 0.105709 | 0.150936  | 0.700356 | 0.609634  | 0.034353 | -0.51384 |          |
| P38159_sAPSPGVRSSgMGGRR_S4_S9_S10_S11_1               | P38159 | RBMX     | 27316 RNA binding motif protein, X-linked                | 5168.S173.S174.S1_1 | 24.95;24.95;24.95;24.95 |  |       | PKRSPAPSGVRSSG      | 0.179856 | 0.216975 | 0.165671 | 0.096973 | 0.131775  | 0.103062 | 0.110603  | 0.187501 | 0.589983  | 0.659688 | 0.014665 | -0.7615  |
| P38159_yDYSSMRDYGGSRR_S7_1                            | P38159 | RBMX     | 27316 RNA binding motif protein, X-linked                | 5316                |                         |  | 88.4  | YDYSSMRDYGGSRR      | 0.316801 | 0.388207 | 0.232613 | 0.131    | 0.198332  | 0.190748 | 0.17336   | 0.312554 | 0.55468   | 0.366311 | 0.04984  | -0.85027 |
| P38398_sPSPFTHLAQGYR_S1_1                             | P38398 | BRCA1    | 221927 BRCA1 associated ATM activator 1                  | 51189               |                         |  | 97.58 | QKGLGSRSPFPFHT      | 0.238884 | 0.221152 | 0.27409  | 0.172776 | 0.173205  | 0.138072 | 0.161351  | 0.244695 | 0.659396  | 0.717662 | 0.012755 | -0.60078 |
| P38398_sPSPFTHLAQGYR_S1_S7_1                          | P38398 | BRCA1    | 221927 BRCA1 associated ATM activator 1                  | 51189.S1191.T1191   | 33.33;33.33;33.33       |  |       | QKGLGSRSPFPFHT      | 0.179888 | 0.20621  | 0.187072 | 0.106888 | 0.152975  | 0.085967 | 0.11661   | 0.184263 | 0.618872  | 0.406803 | 0.036203 | -0.69229 |
| P38398_sPSPFTHLAQGYR_S1_S7_1                          | P38398 | BRCA1    | 221927 BRCA1 associated ATM activator 1                  | 51191.T1194         | 44.96;44.96             |  |       | GLGSRSPFPFHT        | 0.313217 | 0.274203 | 0.320961 | 0.192038 | 0.172467  | 0.137648 | 0.167384  | 0.320793 | 0.5528    | 0.905621 | 0.032449 | -0.85517 |
| P38432_nS1TIQNVPETPK_S3_S1_1                          | P38432 | COL1     | 8161 collagen                                            | 5454.S447           | 47.98;47.98             |  |       | LNDLVKNSSTIQNP      | 0.14005  | 0.17436  | 0.137661 | 0.095238 | 0.108716  | 0.099459 | 0.101138  | 0.10699  | 0.617165  | 0.202622 | 0.016643 | -0.57526 |
| P39880_rPSLQSLGPEAAEAR_S3_S7_1                        | P39880 | CUX1     | 1523 cut like homeobox 1                                 | 51454.S1458         | 46.78;46.78             |  |       | PSAPRRPSSQLGPEAAEAR | 0.157176 | 0.184154 | 0.206458 | 0.086111 | 0.0749    | 0.075607 | 0.088773  | 0.182776 | 0.4431526 | 0.124203 | 0.020032 | -1.21248 |
| P40222_rPEGSAQAPSPR_S12_1                             | P40222 | TXLNA    | 200081 taxilin alpha                                     | 5155                |                         |  | 94.56 | PESGAPSPFRVTEA      | 0.205675 | 0.193042 | 0.235826 | 0.094876 | 0.113957  | 0.087316 | 0.0988716 | 0.241514 | 0.408739  | 0.067811 | 0.029459 | -1.29075 |
| P40222_vQDLSAGGQSLTDSGPERRPEGPAQAPSPR_S11_1           | P40222 | TXLNA    | 200081 taxilin alpha                                     | 5495                |                         |  | 59.93 | LSAGGQSLTDSGPE      | 0.147307 | 0.171457 | 0.17366  | 0.118422 | 0.120988  | 0.112903 | 0.117438  | 0.164414 | 0.715467  | 0.147869 | 0.005988 | -0.48304 |
| P40222_vQDLSAGGQSLTDSGPERRPEGPAQAPSPR_S30_1           | P40222 | TXLNA    | 200081 taxilin alpha                                     | 5514.S515           | 50;50                   |  |       | PGPAQAPSPRVTEA      | 0.169049 | 0.198358 | 0.206812 | 0.13061  | 0.131789  | 0.11978  | 0.127393  | 0.191407 | 0.655563  | 0.200748 | 0.006061 | -0.58735 |
| P40818_sySPDITQAIQIEEER_S1_1                          | P40818 | USP8     | 9101 ubiquitin specific peptidase 8                      | 5716                |                         |  | 99.6  | EPSKLKRYSFPDIT      | 0.224036 | 0.17899  | 0.245236 | 0.160666 | 0.191789  | 0.156097 | 0.145517  | 0.216087 | 0.673419  | 0.609518 | 0.03945  | -0.57042 |
| P42166_dsGSFVAFQNIPEGSLMSFFAK_S2_1                    | P42166 | TMPO     | 7112 thymopointin                                        | 5442                |                         |  | 91.24 | KSVSEERDSSGFVAFQ    | 0.218746 | 0.209971 | 0.314791 | 0.131042 | 0.092561  | 0.134648 | 0.119417  | 0.247836 | 0.481838  | 0.277248 | 0.023797 | -1.05338 |
| P42166_IAsERNLfSck_S3_1                               | P42166 | TMPO     | 7112 thymopointin                                        | 5272                |                         |  | 100   | GQLQKLASERNLfSCK    | 0.244841 | 0.318318 | 0.187928 | 0.075749 | 0.113404  | 0.085523 | 0.091559  | 0.250362 | 0.365705  | 0.164034 | 0.105171 | -1.45125 |
| P42166_nRPLPAGfNSk_T9_1                               | P42166 | TMPO     | 7112 thymopointin                                        | T57                 |                         |  | 98.95 | RPLPAGfNSKGPDP      | 0.211353 | 0.18366  | 0.243521 | 0.111908 | 0.078707  | 0.072968 | 0.087861  | 0.212845 | 0.412793  | 0.659892 | 0.004091 | -1.27651 |
| P42166_sTPLTfSSAENTR_T3_1                             | P42166 | TMPO     | 7112 thymopointin                                        | T160                |                         |  | 97.98 | RTSRSSSTPLTfSS      | 0.22834  | 0.226745 | 0.237675 | 0.104944 | 0.150301  | 0.102454 | 0.119233  | 0.23092  | 0.516338  | 0.091691 | 0.002174 | -0.95361 |
| P42167_emFPYEAStPTGISAsCRfPK_S14_S16_1                | P42167 | TMPO     | 7112 thymopointin                                        | 5360.S362           | 47.69;47.69             |  |       | ASTPTGISAsCRfPK     | 0.113519 | 0.185689 | 0.155622 | 0.06313  | 0.09625   | 0.057266 | 0.072215  | 0.15164  | 0.476323  | 0.503238 | 0.034055 | -1.06999 |
| P42167_eQGETRSStPLTfSSAENTR_S9_1                      | P42167 | TMPO     | 7112 thymopointin                                        | 5159                |                         |  | 89.5  | QGETRSStPLTfSS      | 0.170093 | 0.185334 | 0.175122 | 0.105956 | 0.139099  | 0.113278 | 0.120658  | 0.17685  | 0.682261  | 0.378391 | 0.005501 | -0.5516  |
| P42167_gLQALRESTR_S11_1                               | P42167 | TMPO     | 7112 thymopointin                                        | S250                |                         |  | 80.37 | LQALRESTRGSRRT      | 0.210108 | 0.194464 | 0.209447 | 0.045761 | 0.07129   | 0.068143 | 0.061731  | 0.204673 | 0.30161   | 0.575488 | 0.00115  | -1.72924 |
| P42167_gLQALRESTRGSR_S11_S15_2                        | P42167 | TMPO     | 7112 thymopointin                                        | S250.S254           | 93.73;94.1              |  |       | LQALRESTRGSRRT      | 0.160393 | 0.152487 | 0.194478 | 0.07376  | 0.104936  | 0.107089 | 0.095262  | 0.168786 | 0.564393  | 0.847713 | 0.001129 | -0.82523 |
| P42167_nRPLPAGfNSk_T9_1                               | P42167 | TMPO     | 7112 thymopointin                                        | T57                 |                         |  | 98.95 | RPLPAGfNSKGPDP      | 0.246044 | 0.176372 | 0.240471 | 0.111731 | 0.073559  | 0.079043 | 0.088111  | 0.221662 | 0.396605  | 0.426056 | 0.00625  | -1.33423 |
| P42167_rVHNQSYQAGfTETEWtSSGSK_S7_Y8_S9_1              | P42167 | TMPO     | 7112 thymopointin                                        | S222.Y223.S224      | 33.17;33.17;33.17       |  |       | RVHNSQSYQAGfT       | 0.275193 | 0.18677  | 0.232615 | 0.114079 | 0.088508  | 0.127895 | 0.110614  | 0.231526 | 0.475803  | 0.339173 | 0.012332 | -1.07156 |
| P42167_sTPLTfSSAENTR_T3_1                             | P42167 | TMPO     | 7112 thymopointin                                        | S265819             |                         |  | 97.98 | RTSRSSSTPLTfSS      | 0.265819 | 0.217747 | 0.238213 | 0.104777 | 0.140471  | 0.110983 | 0.118744  | 0.240593 | 0.493547  | 0.76916  | 0.02367  | -1.01874 |
| P42167_vHNQSYQAGfTETEWtSSGSK_S8_1                     | P42167 | TMPO     | 7112 thymopointin                                        | S224                |                         |  | 98.47 | VHNQSYQAGfT         | 0.223184 | 0.166593 | 0.196208 | 0.155128 | 0.135115  | 0.130714 | 0.140319  | 0.195328 | 0.718376  | 0.348916 | 0.037119 | -0.47719 |
| P42226_gyVPATK_Y2_1                                   | P42226 | STAT6    | 6778 signal transducer and activator of transcription 6  | Y641                |                         |  | 98.47 | KSVDEERDSSGFVAFQ    | 0.244566 | 0.243643 | 0.243122 | 0.082244 | 0.106758  | 0.111601 | 0.100201  | 0.243777 | 0.411036  | 0.004306 | 0.039718 | -1.28266 |
| P42229_eANNCSfPAGfLVDAMSQK_S7_1                       | P42229 | STAT5A   | 6776 signal transducer and activator of transcription 5A | S128                |                         |  | 94.78 | REANNCSfPAGfLV      | 0.209425 | 0.210129 | 0.205666 | 0.071739 | 0.110874  | 0.103853 | 0.095489  | 0.208707 | 0.457525  | 0.106227 | 0.106651 | -1.12808 |
| P42331_sKfDfLSPfPAQK_S7_1                             | P42331 | ARHGAP25 | 9938 Rho GTPase activating protein 25                    | S362                |                         |  | 100   | KfDfLSPfPAQKND      | 0.167888 | 0.177655 | 0.168078 | 0.090451 | 0.127147  | 0.128569 | 0.115389  | 0.112107 | 0.673973  | 0.152523 | 0.013333 | -0.56924 |
| P42345_tDSYAGSfVEfLGDfVEGfPAHk_S3_1                   | P42345 | MTOR     | 2475 mechanistic target of rapamycin                     | S2448               |                         |  | 76.27 | RSRTRfDfSYAGSfV     | 0.187601 | 0.191655 | 0.198014 | 0.141772 | 0.153268  | 0.132083 | 0.142374  | 0.192424 | 0.7399    | 0.393496 | 0.001848 | -0.4346  |
| P42345_tRfDfSYAGSfVEfLGDfVEGfPAHk_S5_1                | P42345 | MTOR     | 2475 mechanistic target of rapamycin                     | S2448               |                         |  | 83.66 | RSPRTRfDfSYAGSfV    | 0.160514 | 0.17879  | 0.20287  | 0.114277 | 0.119905  | 0.115278 | 0.116487  | 0.180725 | 0.644553  | 0.039159 | 0.032426 | -0.63363 |
| P42695_sLGVfLPLfNSGfPek_S11_S13_1                     | P42695 | NCAPD3   | 23310 non-SMC condensin I complex subunit 3              | S1382.S1384         | 49.83;49.83             |  |       | VfLPLfNSGfPEKTC     | 0.186065 | 0.159701 | 0.158704 | 0.087946 | 0.110126  | 0.118907 | 0.10566   | 0.168157 | 0.628341  | 0.972093 | 0.008259 | -0.67038 |
| P42766_gLDDKfLkVfLQR_S10_1                            | P42766 | RPL35    | 11224 ribosomal protein L35                              | S29                 |                         |  | 100   | DLDFLDDKfLkVfLQR    | 0.218378 | 0.214869 | 0.211642 | 0.073325 | 0.088033  | 0.0888   | 0.083386  | 0.216931 | 0.387909  | 0.295652 | 1.68     | -0.36621 |
| P42858_nSfMALQfAHkLk_S2_S3_1                          | P42858 | HTT      | 3064 huntingtin                                          | 5620.S621           | 50;50                   |  |       | ASfMALQfAHkLk       | 0.163052 | 0.190574 | 0.171509 | 0.108872 | 0.111448  | 0.135243 | 0.125088  | 0.175045 | 0.714602  | 0.879157 | 0.00107  | -0.48479 |
| P46019_sLNVfLSDfPPLk_S4_1                             | P46019 | PHKA2    | 5256 phosphorylase kinase regulatory subunit alpha 2     | S729                |                         |  | 100   | VfLSDfPPLk          | 0.20325  | 0.302301 | 0.177151 | 0.062616 | 0.122875  | 0.07426  | 0.08575   | 0.227658 | 0.646453  | 0.039159 | 0.02912  | -1.48088 |
| P46821_tKfSPDSfSYfTfGK_S4_1                           | P46821 | MAP1B    | 4131 microtubule associated protein 1B                   | S1915               |                         |  | 90.64 | KfSPDSfSYfTfGK      | 0.182515 | 0.178272 | 0.171032 | 0.113274 | 0.133277  | 0.108011 | 0.118187  | 0.177773 | 0.666698  | 0.318921 | 0.021247 | -0.5849  |
| P47974_sQKQfDfLQfLAPfPAPPSfATLpAGAAfPPS_S7_1          | P47974 | ZFP361Z  | 678 ZFP361 zinc finger protein like 2                    | S426                |                         |  | 92.27 | AKfEAAfPPSfDfLQfL   | 0.121353 | 0.210678 | 0.2261   | 0.100309 | 0.1333    | 0.137721 | 0.123777  | 0.20303  | 0.609646  | 0.705338 | 0.006198 | -0.71396 |
| P48382_kkVfESSfPAGfANNfQVfALNR_S3_1                   | P48382 | RFK5     | 5993 regulatory factor X5                                | S308                |                         |  | 99.99 | AGfRKRfKfSVfESSfP   | 0.224836 | 0.222821 | 0.195264 | 0.116425 | 0.114767  | 0.085505 | 0.105566  | 0.214307 | 0.49259   | 0.948701 | 0.004422 | -1.02154 |
| P49116_dLRSfPLfATfPfVADfDfGAR_S4_1                    | P49116 | NR2C2    | 7182 nuclear receptor subfamily 2 group C member 2       | S199                |                         |  | 100   | YfRfDfLRSfPLfATfP   | 0.198841 | 0.185934 | 0.212456 | 0.119987 | 0.105958  | 0.141596 | 0.122514  | 0.190797 | 0.615408  | 0.706112 | 0.004205 | -0.70038 |
| P49207_rLsYfNTASfNK_S3_1                              | P49207 | RPL34    | 6164 ribosomal protein L34                               | S12                 |                         |  | 85.69 | YfRfRfRfLsYfNTASfNK | 0.191715 | 0.198409 | 0.169231 | 0.094787 | 0.105853  | 0.088288 | 0.096309  | 0.184652 | 0.516537  | 0.504792 | 0.009007 | -0.95306 |
| P49207_rLsYfNTASfNK_S4_1                              | P49207 | RPL34    | 6164 ribosomal protein L34                               | S12.Y12.T15         | 33.33;33.33;33.33       |  |       | LfYfRfRfLsYfNTASfNK | 0.179138 | 0.216176 | 0.16691  | 0.090344 | 0.101231  | 0.071549 | 0.087708  | 0.186458 | 0.468005  | 0.510382 | 0.004368 | -1.0954  |
| P49207_rLsYfNTASfNK_S4_Y5_1                           | P49207 | RPL34    | 6164 ribosomal protein L34                               | S12                 |                         |  | 99.7  | YfRfRfRfLsYfNTASfNK | 0.21642  | 0.174004 | 0.170374 | 0.149353 | 0.120669  | 0.103365 | 0.124631  | 0.186933 | 0.665815  | 0.90298  | 0.35182  | -0.58681 |
| P49207_rLsYfNTASfNK_Y5_1                              | P49207 | RPL34    | 6164 ribosomal protein L34                               | S12.Y13             | 49.9;49.9               |  |       | LfYfRfRfLsYfNTASfNK | 0.183462 | 0.206067 | 0.178787 | 0.168866 | 0.106329  | 0.097888 | 0.124301  | 0.192475 | 0.645803  | 0.175095 | 0.043379 | -0.63083 |
| P49756_fGASfNSfGQfPNSfK_S6_1                          | P49756 | RBM25    | 58517 RNA binding motif protein 25                       | Y173                |                         |  | 93.96 | TfYfRfRfLsYfNTASfNK | 0.163801 | 0.156359 | 0.147669 | 0.130099 | 0.103668  | 0.08481  | 0.106192  | 0.159943 | 0.68097   | 0.227337 | 0.023386 | -0.55434 |
| P49756_gSfFRfGfPALSfQK_S3_1                           | P49756 | NUMB     | 8650 NUMB, endocytic adaptor protein                     | S276                |                         |  | 99.69 | LkLGAfNSfGQfPNSfK   | 0.153965 | 0.158727 | 0.176303 | 0.079338 | 0.132504  | 0.097248 | 0.10303   | 0.162598 | 0.632094  | 0.318165 | 0.024426 | -0.66179 |
| P49757_qGfPHYfEASfTfSfPFFfKfPQAHLfNGSAfAFfVDDGfI_S7_1 | P49757 | NUMB     | 8650 NUMB, endocytic adaptor protein                     | T572.S573           | 34.54;34.54             |  |       | YfEASfTfSfPFFfKfP   | 0.22403  | 0.1948   | 0.176215 | 0.126625 | 0.122893  | 0.170993 | 0.14017   | 0.198349 | 0.706686  | 0.895916 | 0.04891  | -0.50086 |
| P49757_qQfPHYfEASfTfSfPFFfKfPQAHLfNGSAfAFfVDDGfI_S7_1 | P49757 | NUMB     | 8650 NUMB, endocytic adaptor protein                     | T572.S573           | 34.54;34.54             |  |       | YfEASfTfSfPFFfKfP   | 0.285143 | 0.279685 | 0.262977 | 0.098722 | 0.089046  | 0.081652 | 0.089807  | 0.263935 | 0.34026   | 0.132608 | 0.00     |          |

|                                              |        |          |                                                         |                |                   |                       |          |          |          |          |          |          |          |          |          |          |          |          |
|----------------------------------------------|--------|----------|---------------------------------------------------------|----------------|-------------------|-----------------------|----------|----------|----------|----------|----------|----------|----------|----------|----------|----------|----------|----------|
| P55237_sFEKVENLK_S1_1                        | P55327 | TPD52    | 7163 tumor protein D52                                  | S176           | 100               | KNSPTFKSFEKVEN        | 0.183348 | 0.192855 | 0.216427 | 0.093929 | 0.118188 | 0.062447 | 0.091521 | 0.197544 | 0.463297 | 0.54155  | 0.004957 | -1.10999 |
| P55327_vGGTKPAGGDFGEVLSNAASATTTPEPKTQESL     | P55327 | TPD52    | 7163 tumor protein D52                                  | S223           | 84.57             | LPEKTQESL             | 0.231844 | 0.230025 | 0.274681 | 0.133768 | 0.149291 | 0.117601 | 0.133553 | 0.245517 | 0.543968 | 0.564361 | 0.002888 | -0.87841 |
| P56524_aQSPASATFPVSVQEPPTKPR_S3_S4_1         | P56524 | HDAC4    | 9759 histone deacetylase 4                              | 5632.5633      | 49.67,49.67       | RPLPRAQSPSPASATF.PL   | 0.166579 | 0.184339 | 0.171975 | 0.097161 | 0.132984 | 0.134254 | 0.124666 | 0.174298 | 0.69689  | 0.314983 | 0.016284 | -0.521   |
| P56524_aQSPASATFPVSVQEPPTKPR_S3_S4_S7_1      | P56524 | HDAC4    | 9759 histone deacetylase 4                              | 5632.5633.5636 | 33.24;33.24;33.24 | RPLPRAQSPSPASATF.PL   | 0.167064 | 0.212575 | 0.206276 | 0.113316 | 0.131856 | 0.16084  | 0.135337 | 0.195305 | 0.692295 | 0.970938 | 0.039112 | -0.52917 |
| P57740_qPDIscLIGTGKsPR_S5_T10_1              | P57740 | NUP107   | 57122 nucleoporin 107                                   | 5712.2         | 49.9,49.9         | LRLQRPDIscLIGTG.G.DI  | 0.172466 | 0.165198 | 0.152039 | 0.069997 | 0.123322 | 0.139577 | 0.119966 | 0.163234 | 0.73493  | 0.376884 | 0.034781 | -0.44432 |
| P60174_kQLGELIGLTLNAAK_S3_1                  | P60174 | TP11     | 7167 triosephosphatase isomerase 1                      | 558            |                   | KMNGGRQSGDELIGT       | 0.156248 | 0.162415 | 0.155323 | 0.109702 | 0.126472 | 0.117009 | 0.117728 | 0.157995 | 0.745137 | 0.347471 | 0.010165 | -0.42442 |
| P61978_gSYGDLGPHITVQTPIK_S2_Y3_1             | P61978 | HNRNPK   | 3190 heterogenous nuclear ribonucleoprotein K           | 5379.Y380      | 42.15;42.15       | YVAGGSGYDLGPHI.GP.YAI | 0.140715 | 0.225253 | 0.236064 | 0.082663 | 0.103675 | 0.064578 | 0.083639 | 0.198857 | 0.420597 | 0.261742 | 0.021025 | -1.24949 |
| P62081_rSLTAVHAIDALELVFSEIVGR_S1_T3_1        | P62081 | RP57     | 6201 ribosomal protein S7                               | 5119.T121      | 47.46;47.46       | NKQKRRPSRTLTA.VH.QKI  | 0.136618 | 0.138415 | 0.117862 | 0.102039 | 0.088718 | 0.102675 | 0.097811 | 0.130965 | 0.746824 | 0.648053 | 0.174286 | -0.42112 |
| P62633_gFQVSSsPDIcYR_S7_S8_1                 | P62633 | CNPB     | 7555 COHC-type zinc finger nucleic acid binding protein | 548.549        | 47.47,17.47       | RKGFQ36334.YC.GFI     | 0.136334 | 0.347516 | 0.362895 | 0.146732 | 0.136108 | 0.138445 | 0.140428 | 0.357921 | 0.392351 | 0.554962 | 3.7486   | -1.34978 |
| P62805_risGLYEETR_S3_1                       | P62805 | HIST1H4A | 8359 histone cluster 1 H4 family member A               | 5408           |                   | 10.RGVKRIISGLIYEET    | 0.18219  | 0.196305 | 0.166631 | 0.081893 | 0.131597 | 0.086437 | 0.099976 | 0.181512 | 0.550797 | 0.453206 | 0.010661 | -0.86041 |
| P62995_rPHTPTGVMGRPTYGsR_S18_1               | P62995 | TRA2B    | 6434 transformer 2 beta homolog                         | S215           |                   | 10.MGRL56             | 0.163569 | 0.180675 | 0.084923 | 0.093757 | 0.058469 | 0.07905  | 0.164913 | 0.479341 | 0.80903  | 0.003362 | -1.06088 |          |
| P78345_qAsVTLQPLK_S3_1                       | P78345 | RPP38    | 10557 ribonuclease P/MRP subunit p38                    | S253           |                   | 10.LADGGRASVTLQPLK    | 0.286271 | 0.268356 | 0.195356 | 0.027071 | 0.086863 | 0.061644 | 0.058256 | 0.249994 | 0.23411  | 0.559614 | 0.004275 | -2.09474 |
| P78345_qAsVTLQPLK_S3_T5_1                    | P78345 | RPP38    | 10557 ribonuclease P/MRP subunit p38                    | S253.T255      | 50:50             | LADGGRASVTLQPLK.DGI   | 0.245159 | 0.235118 | 0.17924  | 0.053221 | 0.094512 | 0.069942 | 0.072559 | 0.219839 | 0.330053 | 0.509664 | 0.003441 | -1.59923 |
| P82094_sAtPVncEQDILVSSTPINEGQTLVLDK_T3_1     | P82094 | TMF1     | 7110 TATA element modulatory factor 1                   | T401           |                   | 10.EESGRASATPVNCEQP   | 0.209764 | 0.24389  | 0.22176  | 0.129565 | 0.173202 | 0.106315 | 0.136361 | 0.225138 | 0.605675 | 0.412588 | 0.015678 | -0.72338 |
| P85037_eEAPAsRLRPLYPQISPLK_S6_1              | P85037 | FOXK1    | 221937 forkhead box K1                                  | S213           |                   | 10.HKKEAPASRLRPLYP    | 0.217509 | 0.266718 | 0.201033 | 0.123918 | 0.152025 | 0.070599 | 0.115514 | 0.22842  | 0.505709 | 0.811487 | 0.021868 | -0.98362 |
| P85037_qsPPALAR_S2_1                         | P85037 | FOXK1    | 221937 forkhead box K1                                  | S101           |                   | 10.AAASVRSQSPGALAR    | 0.169199 | 0.233817 | 0.236097 | 0.089526 | 0.119476 | 0.087567 | 0.098856 | 0.213037 | 0.464003 | 0.362935 | 0.009235 | -1.1077  |
| P98082_sPNPVGtGSPK_S9_1                      | P98082 | DAB2     | 1601 DAB2, clathrin adaptor protein                     | S401           |                   | 10.SPNFVGSPPFKGLSI    | 0.192018 | 0.231078 | 0.209821 | 0.097621 | 0.13026  | 0.112259 | 0.11338  | 0.210972 | 0.537417 | 0.822773 | 0.002682 | -0.89589 |
| P98175_gSvGVTSTESyKTLH_K4_1                  | P98175 | RBM10    | 8241 RNA binding motif protein 10                       | Y906           |                   | 10.GARGSSYGVSTSTES    | 0.242369 | 0.253282 | 0.183472 | 0.093311 | 0.116609 | 0.101352 | 0.103757 | 0.226374 | 0.458345 | 0.180664 | 0.005715 | -1.1255  |
| Q00013_qGSLHVGDEILEINTNVNHSVDLQK_S3_1        | Q00013 | MPP1     | 4354 membrane palmitoylated protein 1                   | S110           |                   | 10.LGIRHSGSLHVGDEI    | 0.191044 | 0.171666 | 0.177734 | 0.094219 | 0.129466 | 0.108572 | 0.110752 | 0.180148 | 0.614786 | 0.476455 | 0.004801 | -0.70184 |
| Q00013_rPEAVSHPLNTVETEDMVTNGSPAPGPAQVK_S27_1 | Q00013 | MPP1     | 4354 membrane palmitoylated protein 1                   | S117           |                   | 10.NGSPAPGPAQVK       | 0.179644 | 0.202252 | 0.224286 | 0.129185 | 0.129111 | 0.120831 | 0.126376 | 0.202061 | 0.625434 | 0.088457 | 0.00456  | -0.67707 |
| Q00577_qTVNRGPGGLSQTGQITAIAPAGLIEFR_S11_1    | Q00577 | PURA     | 5813 purine rich element binding protein A              | S582           |                   | 10.PLRGSRGTPGGTQ      | 0.170826 | 0.161933 | 0.168259 | 0.094466 | 0.132673 | 0.135937 | 0.121026 | 0.160766 | 0.724677 | 0.075806 | 0.027588 | -0.46459 |
| Q00653_InSIVPErKFPAPETADGPIVLVEQPK_S4_1      | Q00653 | NFKB2    | 4791 nuclear factor kappa B subunit 2                   | S22.523        | 50:50             | YDFKFNLSIVEPK.E.DDI   | 0.176328 | 0.140725 | 0.159676 | 0.103584 | 0.11065  | 0.121598 | 0.113494 | 0.15891  | 0.70445  | 0.412183 | 0.015237 | -0.50543 |
| Q01167_rIKEDGEGEIVALSVDTPPAAVR_T4_1          | Q01167 | FOXK2    | 3607 forkhead box K2                                    | T604           |                   | 10.PEIKRKTDEDEGQ      | 0.209224 | 0.27399  | 0.23192  | 0.103714 | 0.178513 | 0.117044 | 0.113909 | 0.238378 | 0.558317 | 0.808404 | 0.024273 | -0.84084 |
| Q01432_qSLSLQMPQDQDK_S5_S5_1                 | Q01432 | AMPD3    | 272 adenosine monophosphate deaminase 3                 | S85.S87        | 49.99,49.99       | FKMRTRQSLSLQMP.P.MII  | 0.131802 | 0.198554 | 0.137232 | 0.048335 | 0.079719 | 0.060159 | 0.062738 | 0.155862 | 0.402519 | 0.309097 | 0.011612 | -1.31287 |
| Q01432_qSLSLQMPQDQDK_S5_1                    | Q01432 | AMPD3    | 272 adenosine monophosphate deaminase 3                 | S87            |                   | 10.HKEARSLSLQMP.PQ    | 0.188434 | 0.221213 | 0.176617 | 0.048886 | 0.134009 | 0.071902 | 0.092632 | 0.195421 | 0.496017 | 0.664387 | 0.013121 | -0.31254 |
| Q01433_qSVDKVLDPDILLR_S3_1                   | Q01433 | AMPD2    | 271 adenosine monophosphate deaminase 2                 | S168           |                   | 10.PLERQISQVQKPLEP    | 0.16771  | 0.21221  | 0.160107 | 0.092425 | 0.145403 | 0.111427 | 0.116419 | 0.180009 | 0.646738 | 0.952545 | 0.472444 | -0.62875 |
| Q01433_slPGAAPcLk_S1_1                       | Q01433 | AMPD2    | 271 adenosine monophosphate deaminase 2                 | S100           |                   | 10.PLQASRSLPGAAPC     | 0.156408 | 0.187932 | 0.145374 | 0.063708 | 0.108329 | 0.096594 | 0.096594 | 0.163238 | 0.548546 | 0.953787 | 0.012469 | -0.86631 |
| Q01664_fIQELSGSsP_S9_1                       | Q01664 | TFAP4    | 7023 transcription factor AP-4                          | S1284          |                   | 10.IQELSGSsPKRRAR     | 0.164084 | 0.185037 | 0.179235 | 0.114617 | 0.154943 | 0.097506 | 0.122202 | 0.176119 | 0.693862 | 0.236377 | 0.041245 | -0.52728 |
| Q01804_rDEQYVQYR_S1_1                        | Q01804 | OTUD4    | 54726 OTU deubiquitinase 4                              | S1040          |                   | 10.WPFQPSRSDGEEVQY    | 0.149768 | 0.192475 | 0.162735 | 0.100669 | 0.119683 | 0.095194 | 0.105182 | 0.168232 | 0.624872 | 0.512569 | 0.067837 | -0.67837 |
| Q02241_sVsPSPVLSNYIAQISNQQLMSQPLQHR_S3_1     | Q02241 | KIF23    | 9493 kinesin family member 23                           | S684           |                   | 10.KVTRQSRVSPVFLPVS   | 0.208036 | 0.198048 | 0.261888 | 0.125984 | 0.152094 | 0.179818 | 0.152632 | 0.212647 | 0.71777  | 0.588355 | 0.031553 | -0.47841 |
| Q02543_ahSIQIMK_S3_1                         | Q02543 | RPL18A   | 6142 ribosomal protein L18a                             | S1283          |                   | 10.SVLS452            | 0.168945 | 0.163868 | 0.098008 | 0.103684 | 0.094846 | 0.095846 | 0.161445 | 0.593677 | 0.976271 | 0.00388  | -0.75225 |          |
| Q03164_sDTPVEHPPLPISQSPENSDRR_S13_1          | Q03164 | KMTZ4    | 4297 lysine methyltransferase 24                        | S516           |                   | 10.VPFLPIQSPENES      | 0.197347 | 0.215134 | 0.179943 | 0.130007 | 0.151551 | 0.104213 | 0.128591 | 0.197475 | 0.651174 | 0.710664 | 0.015579 | -0.61888 |
| Q03164_sGSDRNSALSDPSVSPLNK_S1_1              | Q03164 | KMTZ4    | 4297 lysine methyltransferase 24                        | S516           |                   | 10.KFRGPRSPGSDRNSA    | 0.171809 | 0.177569 | 0.198463 | 0.14591  | 0.10928  | 0.130935 | 0.182674 | 0.171004 | 0.695523 | 0.019711 | -0.47995 |          |
| Q03164_sGSDRNSALSDPSVSPLNK_S1_S3_1           | Q03164 | KMTZ4    | 4297 lysine methyltransferase 24                        | S181.S183      | 47.61;47.61       | KFRGPRSPGSDRNSA.RGI   | 0.201824 | 0.200491 | 0.265774 | 0.146746 | 0.133742 | 0.127552 | 0.136013 | 0.222696 | 0.610757 | 0.128978 | 0.017661 | -0.71133 |
| Q03188_rTSGVNQVPSAqK_S10_1                   | Q03188 | CENPA    | 1060 centromere protein 2                               | S176           |                   | 10.VSQVNTTSGVNQVPSA   | 0.173928 | 0.169274 | 0.164009 | 0.090261 | 0.124045 | 0.113417 | 0.108041 | 0.16907  | 0.639031 | 0.179691 | 0.003088 | -0.64604 |
| Q03252_aTSSSGLSATGR_T2_S3_1                  | Q03252 | LMBN2    | 84823 lamin B2                                          | T418.S419      | 46.04;46.04       | RVTYSRATSSSGLS.VT     | 0.166274 | 0.247201 | 0.242042 | 0.093493 | 0.158002 | 0.122012 | 0.124502 | 0.218506 | 0.56979  | 0.67468  | 0.434013 | -0.8115  |
| Q03252_ikLsSPSSR_S4_1                        | Q03252 | LMBN2    | 84823 lamin B2                                          | S405           |                   | 10.EEERLkLsSPSSSRV    | 0.14427  | 0.179843 | 0.14963  | 0.103982 | 0.12588  | 0.099595 | 0.109419 | 0.157915 | 0.695432 | 0.704088 | 0.02068  | -0.52402 |
| Q04656_sPNSYTDATFIIDGmHck_S1_1               | Q04656 | ATP7A    | 538 ATPase copper transpore alpha                       | S270           |                   | 10.SLKGQRSPVSTYKDS    | 0.130636 | 0.128323 | 0.157186 | 0.098336 | 0.113109 | 0.088044 | 0.09983  | 0.138715 | 0.719676 | 0.763249 | 0.29868  | -0.47458 |
| Q05655_gRGEyFAK_Y5_1                         | Q05655 | PRKCD    | 5580 protein kinase C delta                             | Y374           |                   | 10.EELGQRGEYFAK       | 0.155486 | 0.172139 | 0.182769 | 0.083251 | 0.137116 | 0.070536 | 0.096968 | 0.170132 | 0.599597 | 0.262946 | 0.028802 | -0.81108 |
| Q05655_nLIDSmQSAFAGFsFVNPk_S15_1             | Q05655 | PRKCD    | 5580 protein kinase C delta                             | S664           |                   | 10.QSAFAGFsFVNPK      | 0.172859 | 0.193807 | 0.160734 | 0.083368 | 0.127663 | 0.120826 | 0.110619 | 0.1758   | 0.629231 | 0.6598   | 0.017909 | -0.66834 |
| Q05655_sEDEAKPtmNRR_T9_1                     | Q05655 | PRKCD    | 5580 protein kinase C delta                             | Y144           |                   | 10.EDAEPKTFMNRKAI     | 0.167113 | 0.21237  | 0.193927 | 0.086089 | 0.109008 | 0.085386 | 0.093944 | 0.191137 | 0.489148 | 0.517191 | 0.003603 | -1.03166 |
| Q05D32_kyEVDDSLSPSGGEKPSK_S3_1               | Q05D32 | CTDSP12  | 51496 CTD small phosphatase like 2                      | S28            |                   | 10.ARARKKYSEVDDSLP    | 0.195229 | 0.196495 | 0.234927 | 0.151935 | 0.12619  | 0.167199 | 0.148441 | 0.20887  | 0.714015 | 0.874915 | 0.030325 | -0.48597 |
| Q05D32_kyEVDDSLSPSGGEKPSK_Y2_S3_1            | Q05D32 | CTDSP12  | 51496 CTD small phosphatase like 2                      | Y27.S28        | 50:50             | TARAKRYSEVDDSL.AR     | 0.162563 | 0.201149 | 0.1938   | 0.119918 | 0.118539 | 0.121028 | 0.119828 | 0.18789  | 0.641389 | 0.800754 | 0.024846 | -0.64073 |
| Q05D32_kyEVDDSLSPSGGEKPSKNETGLSSK_Y2_1       | Q05D32 | CTDSP12  | 51496 CTD small phosphatase like 2                      | Y27            |                   | 10.TARAKRYSEVDDSL     | 0.178588 | 0.213212 | 0.221387 | 0.150903 | 0.1323   | 0.153937 | 0.145713 | 0.204395 | 0.712899 | 0.42001  | 0.016455 | -0.48823 |
| Q05D32_kyEVDDSLSPSGGEKPSKNETGLSSK_Y2_S3_1    | Q05D32 | CTDSP12  | 51496 CTD small phosphatase like 2                      | Y27.S28        | 49.97,49.97       | TARAKRYSEVDDSL.AR     | 0.178201 | 0.183982 | 0.225709 | 0.155339 | 0.131189 | 0.152933 | 0.146487 | 0.195964 | 0.747521 | 0.416939 | 0.042336 | -0.41981 |
| Q05D32_nTGLSSk_S8_1                          | Q05D32 | CTDSP12  | 51496 CTD small phosphatase like 2                      | S51            |                   | 10.NTGLSSkKFKFK       | 0.190596 | 0.149135 | 0.157632 | 0.085362 | 0.099695 | 0.117538 | 0.100865 | 0.165787 | 0.608399 | 0.702767 | 0.014433 | -0.71691 |
| Q06210_vDtTcLPVPEEK_S3_1                     | Q06210 | GFPT1    | 2673 thiamine--fructose-6-phosphate transaminase 1      | S261           |                   | 10.CNLSRSLTcLPVPEEK   | 0.165399 | 0.176292 | 0.171085 | 0.101203 | 0.139179 | 0.126322 | 0.122325 | 0.170912 | 0.715192 | 0.148439 | 0.013697 | -0.46836 |
| Q06587_slRPPDMFALISK_S1_1                    | Q06587 | RING1    | 6015 ring finger protein 1                              | S96            |                   | 10.KRLVSRSLRPPDMF     | 0.247153 | 0.207671 | 0.14708  | 0.092635 | 0.106618 | 0.10848  | 0.102577 | 0.200635 | 0.511265 | 0.075351 | 0.29358  | -0.96786 |
| Q07002_rASLSDIGFGK_S3_S5_1                   | Q07002 | CDK18    | 5129 cyclin dependent kinase 18                         | S132.S134      | 50:50             | SKMSRSLSDIGFG.MSI     | 0.257302 | 0.355824 | 0.218133 | 0.101473 | 0.035167 | 0.026657 | 0.02552  | 0.27086  | 0.092102 | 0.040989 | 0.023566 | -3.44063 |
| Q07002_rASLSDIGFGK                           |        |          |                                                         |                |                   |                       |          |          |          |          |          |          |          |          |          |          |          |          |



|                                              |        |        |                                                               |                |                   |                       |          |          |          |          |           |          |          |          |          |          |          |          |
|----------------------------------------------|--------|--------|---------------------------------------------------------------|----------------|-------------------|-----------------------|----------|----------|----------|----------|-----------|----------|----------|----------|----------|----------|----------|----------|
| Q13111_sPSTYHTPTSEDAAIAPS_S1_1               | Q13111 | CHAF1A | 10036 chromatin assembly factor 1 subunit A                   | 5775           | 69.52             | NHTGSPRSPSTTYLH       | 0.171845 | 0.197365 | 0.203007 | 0.111613 | 0.105373  | 0.070889 | 0.095958 | 0.190739 | 0.503088 | 0.728591 | 0.003961 | -0.99112 |
| Q13112_gsPGPRVPEVTPASR_S2_S3_1               | Q13112 | CHAF1B | 8208 chromatin assembly factor 1 subunit B                    | 5409.5410      | 50:50             | KQSTHRGSSFGPPRRV_SQ'  | 0.1699   | 0.1939   | 0.197872 | 0.12295  | 0.144311  | 0.106845 | 0.124702 | 0.187224 | 0.666059 | 0.786275 | 0.010924 | -0.58628 |
| Q13112_tDTPPSTVSTVSTPTEIEQSTPGDAQGSPPELK_S3  | Q13112 | CHAF1B | 8208 chromatin assembly factor 1 subunit B                    | 5538           |                   | TPGDQAFSGFPELKRKP     | 0.217663 | 0.228952 | 0.272214 | 0.137741 | 0.178583  | 0.144808 | 0.153701 | 0.239609 | 0.661504 | 0.72986  | 0.014610 | -0.64047 |
| Q13129_gHRPvPAPGASGLRPLWQLETSLR_S6_S12_1     | Q13129 | RLF    | 6018 rearranged L-myc fusion                                  | 541            |                   | VRGHRVPSFAPGASG       | 0.179063 | 0.178384 | 0.26139  | 0.125011 | 0.135415  | 0.100137 | 0.120188 | 0.206279 | 0.582645 | 0.252112 | 0.043214 | -0.77931 |
| Q13129_gHRPvPAPGASGLRPLWQLETSLR_S6_S12_1     | Q13129 | RLF    | 6018 rearranged L-myc fusion                                  | 541.547        | 49.99,49.99       | VRGHRVPSFAPGASG_VSI   | 0.187176 | 0.207165 | 0.17046  | 0.125118 | 0.112735  | 0.117678 | 0.188267 | 0.62506  | 0.502593 | 0.00331  | -0.67793 |          |
| Q13129_hLPDLFCASEANQIDTEAENLK_S15_T19_1      | Q13129 | RLF    | 6018 rearranged L-myc fusion                                  | 5878.T882      | 47.12,47.12       | FQCAESANQIDTETA_SAI   | 0.278204 | 0.22859  | 0.25889  | 0.162985 | 0.218559  | 0.118829 | 0.164558 | 0.255228 | 0.644748 | 0.448196 | 0.014034 | -0.63319 |
| Q13129_sPAEPQNSHNDQAK_S1_S3_1                | Q13129 | RLF    | 6018 rearranged L-myc fusion                                  | 5632.5634      | 49.92,49.92       | QKGSFKPSPAIPEQ_GI'    | 0.216667 | 0.181949 | 0.194017 | 0.151694 | 0.1166839 | 0.106396 | 0.124977 | 0.197544 | 0.63265  | 0.711452 | 0.013124 | -0.66052 |
| Q13129_tSDISGSHFQEEHQEQ_S5_1                 | Q13129 | RLF    | 6018 rearranged L-myc fusion                                  | 51272          |                   | ESKTSISFSGHSHR        | 0.132233 | 0.140452 | 0.154138 | 0.094014 | 0.126817  | 0.092451 | 0.104427 | 0.142274 | 0.733986 | 0.490748 | 0.047623 | -0.44617 |
| Q13131_dFLYATSPDFLDDHHLTRHPHER_S7_S11_1      | Q13131 | PKAA1  | 5562 protein kinase A-Myf-activated catalytic subunit alpha 1 | 5356.5360      | 44.68,44.68       | KDFLYATSPDFLDDH.LA'   | 0.206277 | 0.221924 | 0.187619 | 0.159809 | 0.129114  | 0.103732 | 0.130885 | 0.205763 | 0.544883 | 0.013421 | -0.64924 |          |
| Q13177_yLSFTFPEKDFGSPGTPALNAK_Y1_S3_T5_1     | Q13177 | PAK2   | 5062 p21 (RAC1) activated kinase 2                            | Y139.S141.T143 | 31.67,31.67,31.67 | SMTYKQVLYSTPTFPE.TVI  | 0.152237 | 0.190238 | 0.196454 | 0.132654 | 0.128902  | 0.144026 | 0.135194 | 0.179643 | 0.752572 | 0.195355 | 0.037836 | -0.4101  |
| Q13188_klsEDSLTKQEPKDFVLELK_S3_1             | Q13188 | STK3   | 6788 serine/threonine kinase 3                                | 5135           |                   | 0.159393              | 0.152599 | 0.160021 | 0.101936 | 0.13057  | 0.117044  | 0.116617 | 0.157338 | 0.740551 | 0.152516 | 0.090011 | -0.43333 |          |
| Q13188_nAtSPQVQPSFMDYDFK_T3_1                | Q13188 | STK3   | 6788 serine/threonine kinase 3                                | T384           |                   | 0.262523              | 0.265886 | 0.20947  | 0.105908 | 0.118339 | 0.115663  | 0.113303 | 0.24596  | 0.460659 | 0.081981 | 0.020667 | -1.1823  |          |
| Q13206_nSVEVDGPTSHNR_S3_1                    | Q13206 | DDX10  | 1662 DEAD-box helicase 10                                     | 5831           |                   | 0.189874              | 0.176438 | 0.218661 | 0.156193 | 0.152873 | 0.1163    | 0.141789 | 0.194991 | 0.727156 | 0.974189 | 0.040686 | -0.45966 |          |
| Q13242_gsPHYSFPFRPY_S2_1                     | Q13242 | SRSF9  | 8683 serine and arginine rich splicing factor 9               | S211           |                   | 0.148094              | 0.175132 | 0.163298 | 0.107713 | 0.137832 | 0.0988    | 0.114782 | 0.162175 | 0.707765 | 0.610274 | 0.028688 | -0.49866 |          |
| Q13242_gsPHYSFPFRPY_S2_S7_2                  | Q13242 | SRSF9  | 8683 serine and arginine rich splicing factor 9               | Y211.S216      | 100:100           | 0.174368              | 0.158879 | 0.187902 | 0.122839 | 0.106136 | 0.079923  | 0.102966 | 0.173716 | 0.592727 | 0.621312 | 0.009287 | -0.75456 |          |
| Q13242_gsPHYSFPFRPY_Y5_S7_2                  | Q13242 | SRSF9  | 8683 serine and arginine rich splicing factor 9               | Y214.S216      | 91.95,99.92       | 0.15172               | 0.158848 | 0.171576 | 0.114443 | 0.115409 | 0.073072  | 0.100975 | 0.160715 | 0.628285 | 0.295281 | 0.016782 | -0.67051 |          |
| Q13247_dRDGYSYGs_S9_1                        | Q13247 | SRSF6  | 6431 serine and arginine rich splicing factor 6               | 584            |                   | 0.166129              | 0.196543 | 0.188256 | 0.130624 | 0.117988 | 0.121887  | 0.123503 | 0.183643 | 0.672519 | 0.289588 | 0.003596 | -0.57235 |          |
| Q13283_gsPAPADIAQTQVEDLR_S3_1                | Q13283 | G3BP1  | 10146 G3BP stress granule assembly factor 1                   | S232           |                   | 0.181794              | 0.187721 | 0.163634 | 0.103347 | 0.142624 | 0.122164  | 0.122528 | 0.177716 | 0.689461 | 0.579299 | 0.014865 | -0.53646 |          |
| Q13303_rSLVITTK_S3_1                         | Q13303 | KCNAB2 | 8514 potassium voltage-gated channel subfamily A regulatory 2 | S112           |                   | 0.160013              | 0.18606  | 0.165455 | 0.069547 | 0.111202 | 0.084792  | 0.088514 | 0.170509 | 0.519113 | 0.596486 | 0.004849 | -0.94588 |          |
| Q13310_sgVGNVFK_S1_1                         | Q13310 | PABPC4 | 8761 poly (A) binding protein cytoplasmic 4                   | 596            |                   | 0.164861              | 0.165756 | 0.166329 | 0.07875  | 0.11661  | 0.087506  | 0.094289 | 0.165649 | 0.569209 | 0.002782 | 0.042629 | -0.81297 |          |
| Q13370_gLNRNLSPTQLR_S6_1                     | Q13370 | PDE3B  | 5140 phosphodiesterase 3B                                     | 5432           |                   | 0.201092              | 0.260946 | 0.235407 | 0.072217 | 0.114126 | 0.111997  | 0.099447 | 0.232482 | 0.447761 | 0.763687 | 0.003828 | -1.22512 |          |
| Q13370_gSAEEKVPVIRPR_S2_S3_1                 | Q13370 | PDE3B  | 5140 phosphodiesterase 3B                                     | S279.S280      | 50:50             | APLHFLRSLSSAAEKEV_PLI | 0.180697 | 0.18471  | 0.202567 | 0.121286 | 0.147885  | 0.138026 | 0.135732 | 0.189325 | 0.71693  | 0.856924 | 0.006333 | -0.4801  |
| Q13370_rSscVLSGETAASYGScK_S3_S1_1            | Q13370 | PDE3B  | 5140 phosphodiesterase 3B                                     | S295.S296      | 45.62,45.62       | VTRPRRRSSCQVSLGE_IR   | 0.199487 | 0.19673  | 0.170104 | 0.137869 | 0.144318  | 0.112691 | 0.131626 | 0.188276 | 0.69277  | 0.970572 | 0.013146 | -0.52021 |
| Q13370_rSGTGLPVEQSSR_S3_S1_1                 | Q13370 | PDE3B  | 5140 phosphodiesterase 3B                                     | 5441.S442      | 45.78,45.78       | PTPQLRRSSGTSGLL_TF'   | 0.244432 | 0.247081 | 0.228106 | 0.089537 | 0.131258  | 0.100072 | 0.106956 | 0.239873 | 0.445885 | 0.366473 | 0.00061  | -1.16526 |
| Q13370_rSGTGLPVEQSSR_S3_S1_1                 | Q13370 | PDE3B  | 5140 phosphodiesterase 3B                                     | 5442           |                   | 0.276308              | 0.214409 | 0.28606  | 0.078519 | 0.108525 | 0.107805  | 0.098823 | 0.258926 | 0.37958  | 0.325074 | 0.00265  | -1.39752 |          |
| Q13370_sSGTGLPVEQSSR_S1_S2_1                 | Q13370 | PDE3B  | 5140 phosphodiesterase 3B                                     | 5441.S442      | 49.75,49.75       | PTPQLRRSSGTSGLL_TF'   | 0.205351 | 0.195509 | 0.269904 | 0.157839 | 0.142939  | 0.135405 | 0.143904 | 0.222588 | 0.6532   | 0.16018  | 0.29538  | -0.6144  |
| Q13422_nHSAQDSAVENLLLSK_S4_S8_1              | Q13422 | IKZF1  | 10320 IKAROS family zinc finger 1                             | S364.S368      | 47.13,47.13       | GPTRSRKSSQDSVAVE_SNI  | 0.181244 | 0.187278 | 0.143127 | 0.11924  | 0.134045  | 0.115849 | 0.123044 | 0.17055  | 0.721458 | 0.280845 | 0.033326 | -0.47101 |
| Q13425_gLGPSPAPPGRPAGEAGSPVRR_S6_S21_2       | Q13425 | SNTB2  | 6645 syntrophin beta 2                                        | 595.S110       | 100:100           | SRGLGPPSPAPPGRG_PAI   | 0.168215 | 0.165373 | 0.148413 | 0.135599 | 0.090661  | 0.108761 | 0.111674 | 0.160667 | 0.695063 | 0.366354 | 0.02748  | -0.52478 |
| Q13427_eCNPNPQSPASYQR_S11_1                  | Q13427 | PIIG   | 9360 peptidylprolyl isomerase G                               | 5319           |                   | 0.160806              | 0.162307 | 0.187298 | 0.04564  | 0.076156 | 0.063131  | 0.061642 | 0.170137 | 0.362309 | 0.971407 | 0.00919  | -1.46471 |          |
| Q13427_eRKNPNSQSPASYQR_S9_1                  | Q13427 | PIIG   | 9360 peptidylprolyl isomerase G                               | 5315           |                   | 0.171755              | 0.136137 | 0.190329 | 0.116556 | 0.124724 | 0.110158  | 0.117146 | 0.160174 | 0.705385 | 0.131339 | 0.040961 | -1.03632 |          |
| Q13427_sELNEIKENQRSPV_S12_1                  | Q13427 | PIIG   | 9360 peptidylprolyl isomerase G                               | S397           |                   | 0.166743              | 0.192466 | 0.265177 | 0.10819  | 0.106455 | 0.087717  | 0.100787 | 0.208129 | 0.484255 | 0.094235 | 0.023693 | -0.50456 |          |
| Q13428_kLGAEGGGAESVPEKSTTSK_S13_1            | Q13428 | TCOF1  | 6949 treacle ribosome biogenesis factor 1                     | S1378          |                   | 0.174327              | 0.201207 | 0.194412 | 0.162792 | 0.125411 | 0.135689  | 0.141297 | 0.199682 | 0.743741 | 0.687526 | 0.204703 | -0.42713 |          |
| Q13428_IDsSPSVSLLAAK_S3_1                    | Q13428 | TCOF1  | 6949 treacle ribosome biogenesis factor 1                     | S1227          |                   | 0.167727              | 0.19476  | 0.151201 | 0.064296 | 0.112923 | 0.116713  | 0.097977 | 0.178468 | 0.545934 | 0.804849 | 0.037542 | -0.8732  |          |
| Q13428_IDsSPSVSLLAAK_S4_1                    | Q13428 | TCOF1  | 6949 treacle ribosome biogenesis factor 1                     | S1228          |                   | 0.189172              | 0.163071 | 0.182464 | 0.092566 | 0.099299 | 0.105502  | 0.099512 | 0.178236 | 0.556297 | 0.36685  | 0.00798  | -0.84607 |          |
| Q13428_IDsSPSVSLLAAK_T10_1                   | Q13428 | TCOF1  | 6949 treacle ribosome biogenesis factor 1                     | T1234          |                   | 0.174672              | 0.163888 | 0.182972 | 0.133609 | 0.144092 | 0.094379  | 0.124027 | 0.173434 | 0.235302 | 0.36471  | -0.48714 |          |          |
| Q13428_IDSPSVSLLAAKDDPQGEAKQPAQAAGmLSpK_S3   | Q13428 | TCOF1  | 6949 treacle ribosome biogenesis factor 1                     | S1257          |                   | 0.140629              | 0.147826 | 0.139056 | 0.111709 | 0.101349 | 0.074049  | 0.095702 | 0.142571 | 0.67126  | 0.107518 | 0.015361 | -0.57506 |          |
| Q13428_sPQVpKasTmGmGLPK_S1_1                 | Q13428 | TCOF1  | 6949 treacle ribosome biogenesis factor 1                     | S503           |                   | 0.168461              | 0.157297 | 0.144932 | 0.125617 | 0.125962 | 0.08588   | 0.112486 | 0.156975 | 0.71664  | 0.919137 | 0.010565 | -0.48068 |          |
| Q13428_tQSPSSGDSAVGTLPLATSPQSTVQAK_S18_1     | Q13428 | TCOF1  | 6949 treacle ribosome biogenesis factor 1                     | S1111          |                   | 0.208228              | 0.205811 | 0.144166 | 0.129157 | 0.111917 | 0.091302  | 0.110792 | 0.186068 | 0.959439 | 0.42825  | 0.033428 | -0.74797 |          |
| Q13439_vPsvLESLR_S3_1                        | Q13439 | GOLGA4 | 2803 golgin A4                                                | 5711           |                   | 0.188081              | 0.237661 | 0.197082 | 0.06804  | 0.126237 | 0.10949   | 0.101255 | 0.206608 | 0.487724 | 0.874671 | 0.00994  | -1.03586 |          |
| Q13442_mQsLNLK_S3_1                          | Q13442 | PDP1   | 11333 PDGFA associated protein 1                              | S176           |                   | 0.214249              | 0.241097 | 0.226944 | 0.023069 | 0.070792 | 0.047672  | 0.047177 | 0.22743  | 0.207437 | 0.481033 | 0.00038  | -2.28624 |          |
| Q13442_rmQsLNLK_S4_1                         | Q13442 | PDP1   | 11333 PDGFA associated protein 1                              | S176           |                   | 0.308094              | 0.322407 | 0.291431 | 0.084415 | 0.088345 | 0.077466  | 0.083409 | 0.317103 | 0.172415 | 0.224229 | 1.92E-05 | -1.88143 |          |
| Q13469_lSPGSYPTVIOQQNATSQR_S2_1              | Q13469 | NFATC2 | 4773 nuclear factor of activated T-cells 2                    | S856           |                   | 0.168444              | 0.185215 | 0.229596 | 0.131856 | 0.142677 | 0.141394  | 0.138643 | 0.194418 | 0.713115 | 0.06765  | 0.039737 | -0.48779 |          |
| Q13496_yNHSLENIK_S10_1                       | Q13496 | MTM1   | 4534 myotubularin 1                                           | 518            |                   | 0.194768              | 0.208325 | 0.279655 | 0.108914 | 0.07425  | 0.111178  | 0.098114 | 0.227583 | 0.431113 | 0.341615 | 0.011109 | -1.21886 |          |
| Q13501_sSQPSScSDPSKPGGNVEGATQSLAEQMR_S2_S3_1 | Q13501 | SQSTM1 | 8878 sequestosome 1                                           | S283.S284.S291 | 30.07,30.07,30.07 | STTEKSSSQPSSc_SPT     | 0.138069 | 0.241878 | 0.221574 | 0.055464 | 0.110477  | 0.061017 | 0.075652 | 0.200507 | 0.377306 | 0.465117 | 0.02213  | -1.40619 |
| Q13501_sSQPSScSDPSKPGGNVEGATQSLAEQMR_S3_1    | Q13501 | SQSTM1 | 8878 sequestosome 1                                           | S284           |                   | 0.180191              | 0.243492 | 0.297009 | 0.076922 | 0.089355 | 0.078723  | 0.081667 | 0.256893 | 0.317896 | 0.069659 | 0.01286  | -1.65337 |          |
| Q13501_sSQPSScSDPSKPGGNVEGATQSLAEQMR_S6_S7_1 | Q13501 | SQSTM1 | 8878 sequestosome 1                                           | S288.S288      | 38.2,38.2         | EKSSSQPSScSDPSK       | 0.157431 | 0.244732 | 0.220415 | 0.056204 | 0.111358  | 0.065601 | 0.074688 | 0.207526 | 0.359895 | 0.663851 | 0.013986 | -1.47345 |
| Q13501_sSQPSScSDPSKPGGNVEGATQSLAEQMR_T23_S1  | Q13501 | SQSTM1 | 8878 sequestosome 1                                           | T304.S306      | 49.91,49.91       | KGNVEGATQSLAEQMR_NVI  | 0.241545 | 0.262985 |          |          |           |          |          |          |          |          |          |          |

|                                                |        |          |                                                          |                |                   |                     |                                             |          |          |          |          |          |          |          |          |          |          |          |          |
|------------------------------------------------|--------|----------|----------------------------------------------------------|----------------|-------------------|---------------------|---------------------------------------------|----------|----------|----------|----------|----------|----------|----------|----------|----------|----------|----------|----------|
| Q14151_n1TLEtSSLNFK_T5_S6_S7_1                 | Q14151 | SABF2    | 9667 scaffold attachment factor B2                       | T193.S194.S195 | 33.33,33.33,33.33 | GFKNTLETSSLNFKV_FKI | 0.205421                                    | 0.197295 | 0.203804 | 0.091443 | 0.144126 | 0.086144 | 0.107238 | 0.202173 | 0.530425 | 0.035372 | 0.033985 | -0.91478 |          |
| Q14151_sEPVKEESSELOPQAAQDSSVGPDRK_S21_1        | Q14151 | SABF2    | 9667 scaffold attachment factor B2                       |                |                   | 88.3                | FPAQDTSVSGVDKRL                             | 0.18545  | 0.212397 | 0.242392 | 0.120706 | 0.149168 | 0.077896 | 0.115923 | 0.213413 | 0.543186 | 0.773313 | 0.202191 | -0.88048 |
| Q14151_dGSLASMPYSGDOLTK_S10_1                  | Q14157 | UBAP2L   | 9898 ubiquitin associated protein 2 like                 |                |                   | 5859                | SLAANDSPYSGDOLTKRF                          | 0.26835  | 0.222928 | 0.22547  | 0.112545 | 0.12935  | 0.113348 | 0.118414 | 0.213413 | 0.945631 | 0.606263 | 0.021056 | -1.02166 |
| Q14157_gSTTGQSFQLEQFK_S3_1                     | Q14157 | UBAP2L   | 9898 ubiquitin associated protein 2 like                 |                |                   | 5356                | VLLGAKGTSVQSFQFL                            | 0.211467 | 0.206762 | 0.171641 | 0.058353 | 0.15238  | 0.105017 | 0.10525  | 0.196624 | 0.535286 | 0.352935 | 0.037846 | -0.90162 |
| Q14157_tPmTNDGSSNDLPSQAPSLAQVLFVSNK_S3_1       | Q14157 | UBAP2L   | 9898 ubiquitin associated protein 2 like                 |                |                   | 5299                | 9898 VLLGAKGTSVQSFQFL                       | 0.196492 | 0.214282 | 0.206855 | 0.084152 | 0.127182 | 0.104397 | 0.105244 | 0.208674 | 0.511198 | 0.29392  | 0.01017  | -0.96804 |
| Q14157_yPSiSSSQPKDLTQAK_S4_1                   | Q14157 | UBAP2L   | 9898 ubiquitin associated protein 2 like                 |                |                   | 5604.5605           | YPTSRVYSSiSSSQPKDLTQAK_S4_1                 | 0.12799  | 0.16928  | 0.165282 | 0.083234 | 0.112286 | 0.119444 | 0.104488 | 0.154184 | 0.680626 | 0.828902 | 0.045831 | -0.55443 |
| Q14157_yPSiSSSQPKDLTQAK_S8_1                   | Q14157 | UBAP2L   | 9898 ubiquitin associated protein 2 like                 |                |                   | 5609                | YPTSRVYSSiSSSQPKDLTQAK_S8_1                 | 0.139379 | 0.180176 | 0.177049 | 0.095255 | 0.119106 | 0.131581 | 0.115314 | 0.165534 | 0.696917 | 0.9759   | 0.041034 | -0.52156 |
| Q14166_sPGQTPEEGQAQALFAAHLGPALR_S1_S2_1        | Q14166 | TLL12    | 23170 tubulin tyrosine ligase like 12                    |                |                   | 515.516             | RRRPAERSSPGQTPEEGQAQALFAAHLGPALR_S1_S2_1    | 0.176295 | 0.192264 | 0.199195 | 0.125029 | 0.121785 | 0.113135 | 0.119983 | 0.189251 | 0.633987 | 0.430309 | 0.008226 | -0.65747 |
| Q14166_sPGQTPEEGQAQALFAAHLGPALR_S2_1           | Q14166 | TLL12    | 23170 tubulin tyrosine ligase like 12                    |                |                   | 516.283             | RRRPAERSSPGQTPEEGQAQALFAAHLGPALR_S2_1       | 0.162652 | 0.179585 | 0.18124  | 0.089782 | 0.126026 | 0.114846 | 0.110218 | 0.147965 | 0.616369 | 0.469623 | 0.00631  | -0.66283 |
| Q14289_nSLPQIMLNLAR_S2_1                       | Q14289 | PTK2B    | 2185 protein tyrosine kinase 2 beta                      |                |                   | 5375                | 100 KDGEKRNLSLQPLMNLAR_S2_1                 | 0.170281 | 0.190967 | 0.172064 | 0.093033 | 0.11     | 0.105425 | 0.102819 | 0.177771 | 0.578381 | 0.739326 | 0.108807 | -0.78991 |
| Q14289_rHsMREEDIQIPSSR_S3_1                    | Q14289 | PTK2B    | 2185 protein tyrosine kinase 2 beta                      |                |                   | 5778                | 100 HNVFKRHSMREEDIQIPSSR_S3_1               | 0.253528 | 0.194408 | 0.173386 | 0.089175 | 0.118552 | 0.110758 | 0.106612 | 0.207108 | 0.515291 | 0.236537 | 0.060043 | -0.96421 |
| Q14289_nSLPQIMLNLAR_S3_1                       | Q14289 | PTK2B    | 2185 protein tyrosine kinase 2 beta                      |                |                   | 5375                | 100 KDGEKRNLSLQPLMNLAR_S3_1                 | 0.161126 | 0.189406 | 0.19044  | 0.098585 | 0.131718 | 0.130437 | 0.120246 | 0.180324 | 0.666835 | 0.879755 | 0.014272 | -0.5846  |
| Q14498_yRSYSGPK_Y1_1                           | Q14498 | RBM39    | 9584 RNA binding motif protein 39                        |                |                   | Y95                 | 100 YRSYSGPK_Y1_1                           | 0.142278 | 0.186253 | 0.161022 | 0.104216 | 0.136696 | 0.112484 | 0.117799 | 0.163184 | 0.721874 | 0.738286 | 0.047371 | -0.47018 |
| Q14498_yRSYSGPK_Y5_1                           | Q14498 | RBM39    | 9584 RNA binding motif protein 39                        |                |                   | Y99                 | 100 YRSYSGPK_Y5_1                           | 0.162695 | 0.187455 | 0.17813  | 0.099922 | 0.117771 | 0.119051 | 0.112248 | 0.176093 | 0.637435 | 0.848426 | 0.020552 | -0.64965 |
| Q14573_kQvFSAPSLASAGAAEPLDR_S3_1               | Q14573 | ITPR3    | 3710 inositol 1,4,5-trisphosphate receptor type 3        |                |                   | 5934                | 100 kQvFSAPSLASAGAAEPLDR_S3_1               | 0.158444 | 0.229408 | 0.177241 | 0.05642  | 0.104832 | 0.075441 | 0.078897 | 0.188664 | 0.418855 | 0.611188 | 0.012672 | -1.25548 |
| Q14573_kQvFSAPSLASAGAAEPLDR_S6_1               | Q14573 | ITPR3    | 3710 inositol 1,4,5-trisphosphate receptor type 3        |                |                   | 5934.5937           | 100 kQvFSAPSLASAGAAEPLDR_S6_1               | 0.170131 | 0.235511 | 0.18758  | 0.074295 | 0.107173 | 0.067068 | 0.082845 | 0.197741 | 0.418959 | 0.570076 | 0.007649 | -1.25512 |
| Q14596_sLQmTALFPEGLNEK_S1_1                    | Q14596 | NBR1     | 4077 NBR1, autophagy cargo receptor                      |                |                   | 5673                | 100 sLQmTALFPEGLNEK_S1_1                    | 0.151444 | 0.22119  | 0.157282 | 0.087611 | 0.124839 | 0.067366 | 0.093272 | 0.173542 | 0.537459 | 0.86636  | 0.034884 | -0.89577 |
| Q14653_sPLDNPTFPNLGSENPLKR_S1_1                | Q14653 | IRF3     | 3661 interferon regulatory factor 3                      |                |                   | 5173                | 100 sPLDNPTFPNLGSENPLKR_S1_1                | 0.190808 | 0.202505 | 0.186426 | 0.118368 | 0.137466 | 0.075916 | 0.110583 | 0.193246 | 0.572224 | 0.136147 | 0.011744 | -0.80531 |
| Q14653_sPLDNPTFPNLGSENPLKR_S3_1                | Q14653 | IRF3     | 3661 interferon regulatory factor 3                      |                |                   | 5175                | 100 sPLDNPTFPNLGSENPLKR_S3_1                | 0.126283 | 0.171573 | 0.15904  | 0.077389 | 0.111379 | 0.090346 | 0.093038 | 0.152299 | 0.610894 | 0.990642 | 0.24035  | -0.71101 |
| Q14669_rSEPAELPSLR_S4_1                        | Q14669 | TRIP12   | 9320 thyroid hormone receptor interactor 12              |                |                   | 5132                | 100 rSEPAELPSLR_S4_1                        | 0.163252 | 0.135744 | 0.171412 | 0.101178 | 0.10989  | 0.117638 | 0.109569 | 0.156802 | 0.69877  | 0.325186 | 0.01065  | -0.51711 |
| Q14669_vHDFPSNGTGGsFLNLR_S13_1                 | Q14669 | TRIP12   | 9320 thyroid hormone receptor interactor 12              |                |                   | 5148                | 100 vHDFPSNGTGGsFLNLR_S13_1                 | 0.194942 | 0.200352 | 0.214141 | 0.121059 | 0.138255 | 0.111693 | 0.123669 | 0.209263 | 0.699223 | 0.718516 | 0.012626 | -0.71496 |
| Q14669_vHDFPSNGTGGsFLNLR_S6_1                  | Q14669 | TRIP12   | 9320 thyroid hormone receptor interactor 12              |                |                   | 51241               | 100 vHDFPSNGTGGsFLNLR_S6_1                  | 0.179534 | 0.145359 | 0.18078  | 0.094137 | 0.118773 | 0.109561 | 0.10749  | 0.168557 | 0.637707 | 0.554408 | 0.011043 | -0.64903 |
| Q14676_nRSvKTPETVPAPELQSTSDQPVPTEPSTR_S4_1     | Q14676 | MDC1     | 9656 mediator of DNA damage checkpoint 1                 |                |                   | 51467               | 100 nRSvKTPETVPAPELQSTSDQPVPTEPSTR_S4_1     | 0.168579 | 0.19982  | 0.188801 | 0.118401 | 0.127863 | 0.127266 | 0.12451  | 0.185566 | 0.670973 | 0.20224  | 0.035058 | -0.57567 |
| Q14676_nRSvKTPETVPALELPSTDRPVTEPSTOATR_S1_1    | Q14676 | MDC1     | 9656 mediator of DNA damage checkpoint 1                 |                |                   | 51192               | 100 nRSvKTPETVPALELPSTDRPVTEPSTOATR_S1_1    | 0.238969 | 0.250999 | 0.297076 | 0.144759 | 0.114269 | 0.161483 | 0.14947  | 0.262348 | 0.534291 | 0.75715  | 0.055447 | -0.9043  |
| Q14676_nRSvKTPETVPALELPSTDRPVTEPSTOATR_S2_1    | Q14676 | MDC1     | 9656 mediator of DNA damage checkpoint 1                 |                |                   | 51192               | 100 nRSvKTPETVPALELPSTDRPVTEPSTOATR_S2_1    | 0.264834 | 0.239783 | 0.290939 | 0.158673 | 0.129679 | 0.191493 | 0.159048 | 0.265185 | 0.603126 | 0.812446 | 0.010884 | -0.7294  |
| Q14676_nRSvKTPETVPALELPSTDRPVTEPSTOATR_S5_S1_1 | Q14676 | MDC1     | 9656 mediator of DNA damage checkpoint 1                 |                |                   | 51563.S1564         | 100 nRSvKTPETVPALELPSTDRPVTEPSTOATR_S5_S1_1 | 0.240988 | 0.281006 | 0.345727 | 0.084703 | 0.099911 | 0.112898 | 0.099171 | 0.28924  | 0.342865 | 0.1331   | 0.0384   | -1.54429 |
| Q14676_nRSvKTPETVPALELPSTDRPVTEPSTOATR_S5_S1_1 | Q14676 | MDC1     | 9656 mediator of DNA damage checkpoint 1                 |                |                   | 51563.S1564         | 100 nRSvKTPETVPALELPSTDRPVTEPSTOATR_S5_S1_1 | 0.19634  | 0.220215 | 0.234414 | 0.120569 | 0.099095 | 0.105318 | 0.108327 | 0.24629  | 0.342865 | 0.1331   | 0.0384   | -1.54429 |
| Q14676_nRSvKTPETVPALELPSTDRPVTEPSTOATR_S5_T8_1 | Q14676 | MDC1     | 9656 mediator of DNA damage checkpoint 1                 |                |                   | 51564.T1567         | 100 nRSvKTPETVPALELPSTDRPVTEPSTOATR_S5_T8_1 | 0.256659 | 0.262942 | 0.253685 | 0.111505 | 0.116457 | 0.135449 | 0.121137 | 0.257762 | 0.469956 | 0.24533  | 0.21E-05 | -1.0894  |
| Q14684_gsTGGQAQLK_S2_T4_1                      | Q14684 | RBP18    | 23076 ribosomal RNA processing 1B                        |                |                   | 5513.T515           | 100 gsTGGQAQLK_S2_T4_1                      | 0.178931 | 0.218355 | 0.221374 | 0.110258 | 0.119692 | 0.119422 | 0.116458 | 0.20622  | 0.564726 | 0.097828 | 0.030726 | -0.82438 |
| Q14738_rksELPQDVTIK_S3_1                       | Q14738 | PPP2R5D  | 5528 protein phosphatase 2 regulatory subunit B/delta    |                |                   | 5573                | 100 rksELPQDVTIK_S3_1                       | 0.145295 | 0.145305 | 0.194884 | 0.076524 | 0.102648 | 0.081017 | 0.08473  | 0.161861 | 0.523472 | 0.491825 | 0.015548 | -0.93382 |
| Q14847_mPGSGEGEmEPERRDsQDGSYSR_S16_1           | Q14847 | LASP1    | 3927 LIM and SH3 protein 1                               |                |                   | 5146                | 100 mPGSGEGEmEPERRDsQDGSYSR_S16_1           | 0.182905 | 0.200422 | 0.225543 | 0.110969 | 0.12805  | 0.091835 | 0.110805 | 0.202957 | 0.54339  | 0.833543 | 0.004623 | -0.87994 |
| Q14847_mPGSGEGEmEPERRDsQDGSYSR_S16_Y22_1       | Q14847 | LASP1    | 3927 LIM and SH3 protein 1                               |                |                   | 5146.Y152           | 100 mPGSGEGEmEPERRDsQDGSYSR_S16_Y22_1       | 0.197634 | 0.2201   | 0.205265 | 0.106287 | 0.113376 | 0.064048 | 0.080267 | 0.194873 | 0.410714 | 0.90763  | 0.009754 | -1.28379 |
| Q14938_sITSPSTSTTK_S1_1                        | Q14938 | NFIX     | 4784 nuclear factor I X                                  |                |                   | 5265                | 100 sITSPSTSTTK_S1_1                        | 0.220642 | 0.179811 | 0.211452 | 0.10596  | 0.115716 | 0.136841 | 0.119505 | 0.203699 | 0.585903 | 0.703934 | 0.005335 | -0.77127 |
| Q14966_eQsLHYGSLVLLITLEDGTEEDVRK_S3_1          | Q14966 | ZNF638   | 27332 zinc finger protein 638                            |                |                   | 5671                | 100 eQsLHYGSLVLLITLEDGTEEDVRK_S3_1          | 0.160745 | 0.239149 | 0.235202 | 0.116031 | 0.140169 | 0.062542 | 0.106247 | 0.211699 | 0.501188 | 0.894368 | 0.037133 | -0.99459 |
| Q14966_nSQSADPIRSPFVG_S12_1                    | Q14966 | ZNF638   | 27332 zinc finger protein 638                            |                |                   | 5383                | 100 nSQSADPIRSPFVG_S12_1                    | 0.163952 | 0.198403 | 0.156698 | 0.078471 | 0.115234 | 0.10525  | 0.099652 | 0.173018 | 0.575962 | 0.842535 | 0.022661 | -0.79595 |
| Q14846_rSvSDSSV_S3_1                           | Q14846 | GAPVD1   | 9202 GAPase activating protein and VPS9 domains 1        |                |                   | 5902                | 100 rSvSDSSV_S3_1                           | 0.195281 | 0.149968 | 0.166548 | 0.112386 | 0.127244 | 0.127098 | 0.122243 | 0.170599 | 0.716549 | 0.243509 | 0.026692 | -0.48086 |
| Q15003_kAPNLNPGVPLEDQNDDEKER_T9_1              | Q15003 | NCAHP    | 23397 non-SMC condensin I complex subunit H              |                |                   | 749                 | 100 kAPNLNPGVPLEDQNDDEKER_T9_1              | 0.177832 | 0.216718 | 0.192582 | 0.094746 | 0.116459 | 0.087138 | 0.099448 | 0.19571  | 0.508137 | 0.750588 | 0.025654 | -0.97671 |
| Q15003_rVFDLQSTDSR_S1_1                        | Q15003 | NCAHP    | 23397 non-SMC condensin I complex subunit H              |                |                   | 750                 | 100 rVFDLQSTDSR_S1_1                        | 0.229392 | 0.236816 | 0.181859 | 0.109583 | 0.143864 | 0.125574 | 0.139808 | 0.216201 | 0.646653 | 0.305014 | 0.015243 | -0.62894 |
| Q15021_kPSTGKQPLASTASNDVFPPEPR_Y8_1            | Q15021 | NCAPD2   | 9918 non-SMC condensin I complex subunit D2              |                |                   | Y1325               | 100 kPSTGKQPLASTASNDVFPPEPR_Y8_1            | 0.196384 | 0.166961 | 0.180052 | 0.139397 | 0.11068  | 0.130498 | 0.125049 | 0.181132 | 0.690374 | 0.841591 | 0.07411  | -0.53455 |
| Q15032_s5FSGSLVTR_S3_1                         | Q15032 | R3HDM1   | 23518 R3H domain containing 1                            |                |                   | 5381                | 100 s5FSGSLVTR_S3_1                         | 0.130554 | 0.160937 | 0.148163 | 0.064702 | 0.100666 | 0.081837 | 0.082402 | 0.146551 | 0.562272 | 0.836651 | 0.009235 | -0.83066 |
| Q15042_kTASADVNTNYPGDAGK_S3_1                  | Q15042 | RAB3GAP1 | 22930 RAB3 GTPase activating protein catalytic subunit 1 |                |                   | 5537                | 100 kTASADVNTNYPGDAGK_S3_1                  | 0.228813 | 0.202501 | 0.225999 | 0.145495 | 0.152395 | 0.160168 | 0.152866 | 0.219104 | 0.696865 | 0.410385 | 0.00208  | -0.52105 |
| Q15042_kTASADVNTNYPGDAGK_S5_S1_1               | Q15042 | RAB3GAP1 | 22930 RAB3 GTPase activating protein catalytic subunit 1 |                |                   | 5537.5539           | 100 kTASADVNTNYPGDAGK_S5_S1_1               | 0.162222 | 0.207701 | 0.185692 | 0.104722 | 0.139529 | 0.114194 | 0.119482 | 0.182505 | 0.665132 | 0.770047 | 0.011724 | -0.63233 |
| Q15052_kDiPQVLLPEEK_S3_1                       | Q15052 | ARHGEF6  | 9459 Rac/Cdc42 guanine nucleotide exchange factor 6      |                |                   | 5684                | 100 kDiPQVLLPEEK_S3_1                       | 0.167847 | 0.224212 | 0.186493 | 0.074379 | 0.137494 | 0.069858 | 0.09391  | 0.192851 | 0.486958 | 0.731549 | 0.02257  | -1.03813 |
| Q15052_kDiPQVLLPEEKIEETR_S3_1                  | Q15052 | ARHGEF6  | 9459                                                     |                |                   |                     |                                             |          |          |          |          |          |          |          |          |          |          |          |          |

|                                              |        |          |       |                                                                             |                  |                   |                         |          |           |          |          |          |          |          |          |          |          |           |          |
|----------------------------------------------|--------|----------|-------|-----------------------------------------------------------------------------|------------------|-------------------|-------------------------|----------|-----------|----------|----------|----------|----------|----------|----------|----------|----------|-----------|----------|
| Q15691_kPLtSSAAPQRPIQR_S5_S6_1               | Q15691 | MAPRE1   | 22919 | microtubule associated protein RP/EB family member 1                        | S155.S156        | 45.41;45.41       | KPKKPLTSSSAAPQR.PKI     | 0.317879 | 0.33241   | 0.343547 | 0.707556 | 0.113452 | 0.085699 | 0.089902 | 0.331279 | 0.271379 | 0.518573 | 7.83E-05  | -1.88162 |
| Q15691_kPLtSSAAPQRPIQR_T4_S15_T16_2          | Q15691 | MAPRE1   | 22919 | microtubule associated protein RP/EB family member 1                        | T154.S165.T166   | 94.17;50.50       | NKPKPLTSSSAAPQR.AAI     | 0.333729 | 0.258126  | 0.260559 | 0.155051 | 0.112973 | 0.091017 | 0.11968  | 0.284138 | 0.421204 | 0.729034 | 0.006149  | -1.24741 |
| Q15696_dVtLSPDRTPSSFGK_S5_1                  | Q15696 | ZRSR2    | 8233  | zinc finger CCH2-type, RNA binding motif and serine/arg 5349                |                  |                   | ANRDIYLPDRTPSSG         | 0.191579 | 0.176338  | 0.21684  | 0.115978 | 0.090057 | 0.064809 | 0.090281 | 0.194919 | 0.463173 | 0.779942 | 0.005215  | -1.11038 |
| Q15696_dVtLSPDRTPSSFGK_Y3_S5_1               | Q15696 | ZRSR2    | 8233  | zinc finger CCH2-type, RNA binding motif and serine/arg 5349                |                  | 50;50             | ANRDIYLPDRTPSSG.ANI     | 0.166706 | 0.227729  | 0.193529 | 0.070209 | 0.109586 | 0.069312 | 0.082976 | 0.195988 | 0.423371 | 0.724387 | 0.006929  | -1.24001 |
| Q15696_nPNNFEANRDVtLSPDRTPSSFGK_S16_1        | Q15696 | ZRSR2    | 8233  | zinc finger CCH2-type, RNA binding motif and serine/arg 5349                |                  |                   | ANRDIYLPDRTPSSG         | 0.158108 | 0.207514  | 0.160832 | 0.036273 | 0.111606 | 0.086939 | 0.098273 | 0.175485 | 0.560008 | 0.334888 | 0.011747  | -0.83648 |
| Q15742_rSvKVEAEASR_S3_1                      | Q15742 | NAB2     | 4665  | NGF1-A binding protein 2                                                    |                  |                   | LVEGRSSVVKVEAEASR       | 0.138084 | 0.210784  | 0.188509 | 0.063155 | 0.089952 | 0.060181 | 0.071096 | 0.179126 | 0.396905 | 0.324686 | 0.010048  | -1.33313 |
| Q15811_aQsFDVAVPPVAVWAVPQSSR_S3_1            | Q15811 | ITSN1    | 6453  | intersectin 1                                                               |                  |                   | TKLQKQSSVVKVEAEASR      | 0.199183 | 0.213384  | 0.162597 | 0.058571 | 0.093321 | 0.078003 | 0.076232 | 0.191721 | 0.396711 | 0.611155 | 0.00313   | -1.33055 |
| Q15910_gRLPNNSSRPSTPTINVLESK_S11_1           | Q15910 | EZH2     | 2146  | enhancer of zeste 2 polycomb repressive complex 2 subunit 5367              |                  |                   | PNNSSRPSTPTINVL         | 0.234735 | 0.183455  | 0.249467 | 0.118989 | 0.101574 | 0.115873 | 0.112445 | 0.222552 | 0.503904 | 0.134028 | 0.005963  | -0.98878 |
| Q15910_gRLPNNSSRPSTPTINVLESK_T12_1           | Q15910 | EZH2     | 2146  | enhancer of zeste 2 polycomb repressive complex 2 subunit 5367              |                  |                   | PNNSSRPSTPTINVL         | 0.199873 | 0.223456  | 0.22686  | 0.107929 | 0.134709 | 0.132189 | 0.124942 | 0.246229 | 0.517649 | 0.993859 | 0.010588  | -0.79463 |
| Q15910_IPNNSRPSTPTINVLESK_S5_S6_S9_T10_2     | Q15910 | EZH2     | 2146  | enhancer of zeste 2 polycomb repressive complex 2 subunit 5362.5363.5366.T3 | 50;50;49.29;49.3 |                   | GRCLPNNSSRPSTPTT.GR     | 0.214571 | 0.225519  | 0.238102 | 0.138145 | 0.134591 | 0.081774 | 0.11817  | 0.226064 | 0.522728 | 0.242447 | 0.005169  | -0.93587 |
| Q15910_IPNNSRPSTPTINVLESK_S5_T10_2           | Q15910 | EZH2     | 2146  | enhancer of zeste 2 polycomb repressive complex 2 subunit 5362.T367         | 87.72;78.41      |                   | GRCLPNNSSRPSTPTT.NN     | 0.350476 | 0.291905  | 0.27765  | 0.235872 | 0.186046 | 0.153986 | 0.191968 | 0.306677 | 0.625962 | 0.933256 | 0.024527  | -0.67585 |
| Q15942_fSPGAPGSSGQPNQK_S2_1                  | Q15942 | ZYX      | 7791  | zyxin                                                                       |                  |                   | TPVASKFSPGAPGSSG        | 0.187587 | 0.158524  | 0.245411 | 0.115816 | 0.12743  | 0.087028 | 0.110091 | 0.191774 | 0.558346 | 0.362216 | 0.036718  | -0.84077 |
| Q15942_fSPGAPGSSGQPNQK_S9_1                  | Q15942 | ZYX      | 7791  | zyxin                                                                       |                  |                   | SPGAPGSSGQPNQK          | 0.206832 | 0.201466  | 0.253131 | 0.103024 | 0.121018 | 0.114451 | 0.112831 | 0.220476 | 0.511761 | 0.186361 | 0.003341  | -0.96646 |
| Q15942_gPPASSPAPKfSPVTK_S14_1                | Q15942 | ZYX      | 7791  | zyxin                                                                       |                  |                   | PAPAKfSPVTKfKFT         | 0.154951 | 0.177961  | 0.159915 | 0.106656 | 0.136836 | 0.097797 | 0.113763 | 0.164276 | 0.692512 | 0.518551 | 0.012121  | -0.53009 |
| Q15942_vSIDIELSLLDDmT_K5_S3_1                | Q15942 | ZYX      | 7791  | zyxin                                                                       |                  | 50;50             | PQPRKVVSSIDLEID.CPI     | 0.216792 | 0.252581  | 0.190035 | 0.062238 | 0.128769 | 0.045968 | 0.078992 | 0.219803 | 0.359375 | 0.677    | 0.100644  | -1.47644 |
| Q16513_sLPSENVSAVQK_S5_1                     | Q16513 | PKN2     | 5586  | protein kinase N2                                                           |                  |                   | DSRSLPFSENVSAVQ         | 0.238803 | 0.234664  | 0.254826 | 0.07155  | 0.092382 | 0.06943  | 0.077788 | 0.242765 | 0.320424 | 0.826895 | 6.62E-05  | -1.64195 |
| Q16594_IVSGVTSRPSfPTLGTPTQTMVSTK_T5_S12_2    | Q16594 | TA9      | 6880  | TATA-box binding protein associated factor 9                                | S152.T159        | 84.92;78.2        | VPRLSVGVTSRPSfPT.SV     | 0.180317 | 0.153341  | 0.183211 | 0.130772 | 0.129717 | 0.091773 | 0.117421 | 0.172729 | 0.68153  | 0.709483 | 0.02639   | -0.55315 |
| Q16799_gSiEDELTAIK_S4_1                      | Q16799 | RTN1     | 6252  | reticulon 1                                                                 |                  |                   | SQKGSIEDELTAIK          | 0.208123 | 0.143738  | 0.155534 | 0.104139 | 0.091623 | 0.121749 | 0.105837 | 0.169132 | 0.625765 | 0.326261 | 0.042995  | -0.67631 |
| Q1M1S5_IQRPPSVDAISR_S6_1                     | Q1M1S5 | CSPP1    | 79848 | centrosome and spindle pole associated protein 1                            |                  |                   | Q195863.0249246         | 0.195863 | 0.249246  | 0.180158 | 0.064212 | 0.116848 | 0.091072 | 0.090711 | 0.208422 | 0.643527 | 0.691239 | 0.010386  | -1.20016 |
| Q1M1S5_QSPfPVALQNK_S3_1                      | Q1M1S5 | CSPP1    | 79848 | centrosome and spindle pole associated protein 1                            |                  |                   | TKHMRFQSPfPVALQ         | 0.210934 | 0.210254  | 0.195773 | 0.15473  | 0.11293  | 0.1077   | 0.12512  | 0.206564 | 0.608403 | 0.198811 | 0.006812  | -0.7169  |
| Q2KHT3_sRsvWVGGGHGK_S3_1                     | Q2KHT3 | CLEC16A  | 23274 | C-type lectin domain family 16 member A                                     |                  |                   | MFGRSSRsvWVGGGHG        | 0.240209 | 0.243711  | 0.203081 | 0.165816 | 0.163971 | 0.119584 | 0.14979  | 0.229656 | 0.652378 | 0.870861 | 0.016561  | -0.61622 |
| Q2M123_rEnSLPEfPmGTLfHTfVLELDPNK_S4_1        | Q2M123 | ARHGAP31 | 57514 | Rho GTPase activating protein 31                                            |                  |                   | KRERRENSLPEfVFP         | 0.166998 | 0.256124  | 0.182739 | 0.060433 | 0.10682  | 0.101985 | 0.062638 | 0.201953 | 0.308822 | 0.911222 | 0.01946   | -1.69515 |
| Q2M218_tSQQNVYSPDGSTWfNPfDDDNfSK_T1_S2_1     | Q2M218 | AAK1     | 22848 | AP2 associated kinase 1                                                     | T68L.S682        | 50;50             | TPSGKTSQfSQNVY.NP       | 0.26123  | 0.285395  | 0.207806 | 0.077757 | 0.159024 | 0.080643 | 0.062080 | 0.251477 | 0.402747 | 0.851527 | 0.0143    | -1.24897 |
| Q2NWX8_rGSfVEELfTNSfLGMfEK_S4_1              | Q2NWX8 | ERC6G    | 54821 | ERCC exon binding partner 6 like, spindle assembly checkpoint               |                  |                   | TLfPKGfGSfVEELCTN       | 0.175945 | 0.170685  | 0.182558 | 0.103837 | 0.146502 | 0.126834 | 0.125724 | 0.176396 | 0.712738 | 0.144055 | 0.006668  | -0.48856 |
| Q32M24_nmPGLSAATLASfGGTSr_S18_1              | Q32M24 | LRRF1P1  | 9208  | LRR binding FLI1 interacting protein 1                                      |                  |                   | Q252042                 | 0.252042 | 0.22167   | 0.240823 | 0.110318 | 0.123425 | 0.094157 | 0.1093   | 0.238473 | 0.458899 | 0.953556 | 0.001683  | -1.12375 |
| Q32M24_nmPGLSAATLASfGGTSr_T16_S17_S18_1      | Q32M24 | LRRF1P1  | 9208  | LRR binding FLI1 interacting protein 1                                      | T114.S115.S116   | 30.81;30.81;30.81 | TLASfGGTSrRRGGS.LAI     | 0.22399  | 0.222425  | 0.233921 | 0.099055 | 0.124498 | 0.126953 | 0.116986 | 0.226779 | 0.515857 | 0.288443 | 0.003171  | -0.95496 |
| Q32M24_LRRF1P1                               | Q32M24 | LRRF1P1  | 9208  | LRR binding FLI1 interacting protein 1                                      |                  |                   | Q198216                 | 0.198216 | 0.216981  | 0.272115 | 0.148166 | 0.155929 | 0.10881  | 0.137635 | 0.216024 | 0.600753 | 0.609911 | 0.026151  | -0.73516 |
| Q3KQU3_rSOPSPfTAVPASPDPPTK_S2_1              | Q3KQU3 | MAP7D1   | 55700 | MAP7 domain containing 1                                                    |                  |                   | Q148699                 | 0.148699 | 0.190539  | 0.173295 | 0.070477 | 0.13322  | 0.078125 | 0.099481 | 0.170844 | 0.549862 | 0.459164 | 0.029499  | -0.86286 |
| Q3KQU3_rSOPSPfTAVPASPDPPTK_S6_1              | Q3KQU3 | MAP7D1   | 55700 | MAP7 domain containing 1                                                    |                  |                   | Q213231                 | 0.213231 | 0.198917  | 0.142789 | 0.126269 | 0.142583 | 0.121103 | 0.129853 | 0.218631 | 0.955409 | 0.40146  | 0.062624  | -0.74805 |
| Q3KQU3_rSOPSPfTAVPASPDPPTK_T8_1              | Q3KQU3 | MAP7D1   | 55700 | MAP7 domain containing 1                                                    |                  |                   | Q169451                 | 0.169451 | 0.188339  | 0.199765 | 0.079439 | 0.127008 | 0.095031 | 0.100559 | 0.188552 | 0.541073 | 0.566259 | 0.006816  | -0.8861  |
| Q3KQU3_rSOPSPfTAVPASPDPPTK_QKV_S2_1          | Q3KQU3 | MAP7D1   | 55700 | MAP7 domain containing 1                                                    |                  |                   | Q183297                 | 0.183297 | 0.200373  | 0.209531 | 0.126556 | 0.136358 | 0.142419 | 0.135111 | 0.197734 | 0.683299 | 0.530974 | 0.002214  | -0.54941 |
| Q3KQU3_rSOPSPfTAVPASPDPPTK_QKV_S3_1          | Q3KQU3 | MAP7D1   | 55700 | MAP7 domain containing 1                                                    |                  |                   | Q165451                 | 0.165451 | 0.185285  | 0.177298 | 0.110727 | 0.123525 | 0.117817 | 0.117356 | 0.176011 | 0.666753 | 0.584319 | 0.00102   | -0.58477 |
| Q3KQU3_sASfSAPfCVSR_S3_1                     | Q3KQU3 | MAP7D1   | 55700 | MAP7 domain containing 1                                                    |                  |                   | Q189302                 | 0.189302 | 0.157743  | 0.176234 | 0.100543 | 0.127396 | 0.110678 | 0.112872 | 0.174262 | 0.65843  | 0.824467 | 0.008636  | -0.6029  |
| Q3M16_qksLDGLQfLR_S3_1                       | Q3M16  | TBC1D25  | 4943  | TBC1 domain family member 25                                                |                  |                   | Q180266                 | 0.180266 | 0.167778  | 0.16037  | 0.092112 | 0.1401   | 0.114972 | 0.121428 | 0.169471 | 0.716511 | 0.545246 | 0.142439  | -0.48094 |
| Q3V672_qksLTfDR_S3_1                         | Q3V672 | CDC88A   | 55704 | coiled-coil domain containing 88A                                           |                  |                   | Q212136                 | 0.212136 | 0.173555  | 0.286432 | 0.128856 | 0.100096 | 0.147427 | 0.12546  | 0.22701  | 0.52405  | 0.300966 | 0.055476  | -0.85611 |
| Q3V672_rfSHfDLfTK_T2_S3_1                    | Q3V672 | CDC88A   | 55704 | coiled-coil domain containing 88A                                           | T1819.S1820      | 50;50             | VEGfTLRRfSHfDLfTK       | 0.262354 | 0.226231  | 0.212278 | 0.078839 | 0.085028 | 0.079594 | 0.081154 | 0.234016 | 0.346786 | 0.031948 | 0.009013  | -1.52788 |
| Q3V672_sVgkTfPGDfYDRR_S1_S3_1                | Q3V672 | CDC88A   | 55704 | coiled-coil domain containing 88A                                           | S1734.S1736      | 49.77;49.77       | ASGfTRfTSfVgkTfPGDfYDRR | 0.212461 | 0.231103  | 0.159587 | 0.09232  | 0.10662  | 0.123576 | 0.105505 | 0.20105  | 0.52477  | 0.319772 | 0.014995  | -0.93024 |
| Q3V672_sVgkTfPGDfYDRR_T6_1                   | Q3V672 | CDC88A   | 55704 | coiled-coil domain containing 88A                                           | T1739            |                   | ARCSVgkTfPGDfYDRR       | 0.210659 | 0.20386   | 0.143243 | 0.089012 | 0.106774 | 0.107629 | 0.101138 | 0.185921 | 0.543985 | 0.148469 | 0.018993  | -0.87836 |
| Q4ADV7_rfLMSfPSPfGSGK_S6_S1_1                | Q4ADV7 | RIC1     | 57589 | RIC1 homolog, RAB6A GEF complex partner 1                                   | S10037.S1040     | 47.34;47.34       | FSfLQfLrSfMfPSPfGSGK    | 0.215223 | 0.218542  | 0.200033 | 0.126833 | 0.141207 | 0.135864 | 0.134485 | 0.212161 | 0.636566 | 0.733188 | 0.008429  | -0.65162 |
| Q4ADV7_rfLMSfPSPfGSGK_T1_S3_1                | Q4ADV7 | RIC1     | 57589 | RIC1 homolog, RAB6A GEF complex partner 1                                   | T1035.S1037      | 49.99;49.99       | SKfTLQfLrSfMfPSPfGSGK   | 0.255357 | 0.258935  | 0.185461 | 0.081817 | 0.110471 | 0.076663 | 0.08965  | 0.233251 | 0.384351 | 0.324016 | 0.002341  | -1.3795  |
| Q4KMP7_rALAGADsPKfTEARsPAPGfTPTGfPTR_T10_1   | Q4KMP7 | TBC1D10B | 26000 | TBC1 domain family member 10B                                               |                  |                   | Q187286                 | 0.187286 | 0.202006  | 0.199863 | 0.156277 | 0.160646 | 0.112977 | 0.1433   | 0.196385 | 0.729689 | 0.166936 | 0.028824  | -0.45465 |
| Q4KMP7_rQPfLPSfLSLPLGK_S10_1                 | Q4KMP7 | TBC1D10B | 26000 | TBC1 domain family member 10B                                               |                  |                   | Q297735                 | 0.297735 | 0.269727  | 0.221225 | 0.091462 | 0.138903 | 0.1042   | 0.11522  | 0.262896 | 0.442205 | 0.573579 | 0.004624  | -1.23716 |
| Q4KMP7_rPSRfTAPfLAKfPLAPkPVTfVASfVTAR_S3_1   | Q4KMP7 | TBC1D10B | 26000 | TBC1 domain family member 10B                                               |                  |                   | Q106849                 | 0.106849 | 0.199735  | 0.237252 | 0.141547 | 0.147175 | 0.156089 | 0.114827 | 0.214612 | 0.690874 | 0.538185 | 0.005648  | -0.5335  |
| Q4L180_rfSDfPQVfSK_S3_1                      | Q4L180 | FILIP1L  | 11259 | FILIP1 interacting protein 1 like 1                                         |                  |                   | Q100138                 | 0.100138 | 0.1231029 | 0.186936 | 0.084772 | 0.122232 | 0.102475 | 0.10316  | 0.195196 | 0.528494 | 0.499033 | 0.31466   | -0.92004 |
| Q4V328_rSLSfSPfAQfPAPfALSfDEVAfELfQR_S3_S5_1 | Q4V328 | GRIPAP1  | 56850 | GRIP1 associated protein 1                                                  |                  |                   | Q158491                 | 0.158491 | 0.164625  | 0.163412 | 0.111316 | 0.107993 | 0.114649 | 0.111026 | 0.162176 | 0.684603 | 0.876153 | 0.546E-05 | -0.54666 |
| Q4V328_rSLSfSPfAQfPAPfALSfDEVAfELfQR_S5_1    | Q4V328 | GRIPAP1  | 56850 | GRIP1 associated protein 1                                                  |                  |                   | Q153986                 | 0.153986 | 0.184932  | 0.171431 | 0.103927 | 0.138328 | 0.119641 | 0.120632 | 0.170116 | 0.709116 | 0.895899 | 0.02088   | -0.49591 |
| Q53E16_rfVfSGDGGR_S4_1                       | Q53E16 | PDCD4    | 27250 | programmed cell death 4                                                     |                  |                   | Q168857                 | 0.168857 | 0.139085  | 0.183257 | 0.115754 | 0.113045 | 0.126836 | 0.118545 | 0.163733 | 0.724016 | 0.910397 | 0.029799  | -0.46591 |
| Q53E16_sGLfVTPfSfK_S8_1                      | Q53E16 | PDCD4    | 27250 | programmed cell death 4                                                     |                  |                   | Q157046                 | 0.157046 | 0.147658  | 0.192073 | 0.075334 | 0.115098 | 0.110505 | 0.100313 | 0.165592 | 0.605781 | 0.926796 | 0.420451  | -0.72313 |
| Q53E70_qfSPTfmsfTfLSSfTGfVPLDfTS             |        |          |       |                                                                             |                  |                   |                         |          |           |          |          |          |          |          |          |          |          |           |          |

|                                              |        |          |        |                                                               |  |  |                                     |       |       |                 |          |          |          |          |          |          |          |          |          |          |          |          |
|----------------------------------------------|--------|----------|--------|---------------------------------------------------------------|--|--|-------------------------------------|-------|-------|-----------------|----------|----------|----------|----------|----------|----------|----------|----------|----------|----------|----------|----------|
| Q5QJ66_sLsEiNKPNFYNNDDDDFSHR_S3_1            | Q5QJ66 | DNTTIP2  | 30836  | deoxynucleotidyltransferase terminal interacting protein 5253 |  |  |                                     |       | 99.89 | HLQARSLSEiNKPNF | 0.188671 | 0.172969 | 0.169949 | 0.098505 | 0.122199 | 0.097341 | 0.106015 | 0.177196 | 0.598291 | 0.678508 | 0.002031 | -0.74108 |
| Q5QP82_t1t5SDLITSSSSGPR_S3_1                 | Q5QP82 | DCAF10   | 79269  | DBD1 and CUL4 associated factor 10                            |  |  |                                     |       | 76.84 | LRARRTSSSDLTTS  | 0.178172 | 0.259474 | 0.238676 | 0.079351 | 0.142366 | 0.135669 | 0.119129 | 0.225441 | 0.528426 | 0.803486 | 0.027988 | -0.92023 |
| Q5T011_t7t5ESSA5PFR_S3_1                     | Q5T011 | SZT2     | 23334  | seizure threshold 2 homolog                                   |  |  |                                     |       | 84.63 | PQHRRSTSSGSAFFP | 0.143114 | 0.151774 | 0.176871 | 0.091997 | 0.113342 | 0.114503 | 0.106614 | 0.157253 | 0.677977 | 0.686264 | 0.015419 | -0.56069 |
| Q5T1R4_s5vGLcAEASAR_S3_1                     | Q5T1R4 | HIVEP3   | 59269  | human immunodeficiency virus type 1 enhancer binding          |  |  |                                     |       | 83.19 | PLDRSSTVGGCLAE  | 0.188958 | 0.177368 | 0.177674 | 0.106421 | 0.125284 | 0.109258 | 0.113654 | 0.181333 | 0.62677  | 0.59324  | 0.000641 | -0.67399 |
| Q5T1Z8_hRWPGDNIHAEHQVLR_T5_1                 | Q5T1Z8 | PUM1     | 9698   | pumilio RNA binding family member 1                           |  |  |                                     |       | 100   | N8KHRRPTVGCNIAE | 0.24397  | 0.188203 | 0.177999 | 0.126974 | 0.104564 | 0.098973 | 0.11017  | 0.203933 | 0.541669 | 0.96261  | 0.013739 | -0.88452 |
| Q5T1Z8_rDbLUGSSDLLQ3_1                       | Q5T1Z8 | PUM1     | 9698   | pumilio RNA binding family member 1                           |  |  |                                     |       | 87.74 | GGGRRRDLSGSSDL  | 0.183495 | 0.226893 | 0.219018 | 0.078488 | 0.097726 | 0.068695 | 0.081636 | 0.209802 | 0.389112 | 0.579621 | 0.001268 | -1.36174 |
| Q5T200_dRkTASVPSLLDQQR_T4_S5_1               | Q5T200 | ZC3H13   | 23091  | zinc finger CCHC-type containing 13                           |  |  | 50:50                               |       |       | AKSKRRKSLVSSPFL | 0.236747 | 0.270754 | 0.161736 | 0.097753 | 0.127963 | 0.098827 | 0.108181 | 0.230870 | 0.448495 | 0.172551 | 0.027017 | -1.04411 |
| Q5T200_gPRPITTK_T4_1                         | Q5T200 | ZC3H13   | 23091  | zinc finger CCHC-type containing 13                           |  |  |                                     |       | 100   | KKKKRPTPTTITTK  | 0.165889 | 0.186125 | 0.19097  | 0.132528 | 0.131126 | 0.124936 | 0.12953  | 0.180995 | 0.715657 | 0.168865 | 0.003042 | -0.48266 |
| Q5T200_kLsPSP3LR_S1_1                        | Q5T200 | ZC3H13   | 23091  | zinc finger CCHC-type containing 13                           |  |  |                                     |       | 72.87 | VSPTEV006691    | 0.221532 | 0.200691 | 0.228086 | 0.168548 | 0.160755 | 0.144706 | 0.158003 | 0.216077 | 0.728899 | 0.883734 | 0.00561  | -0.45621 |
| Q5T200_kLsPSP3LR_S4_1                        | Q5T200 | ZC3H13   | 23091  | zinc finger CCHC-type containing 13                           |  |  |                                     |       | 90.09 | EVMSRKLSPSP3LR  | 0.165181 | 0.217558 | 0.17762  | 0.114167 | 0.154074 | 0.105273 | 0.124505 | 0.186786 | 0.665663 | 0.948517 | 0.046008 | -0.58519 |
| Q5T200_kLsPTDkPLDQV_S3_1                     | Q5TSC0 | STX8P5   | 134957 | synactin binding protein 5                                    |  |  |                                     |       |       | AKVSRKLSLPTDLRK | 0.17455  | 0.176201 | 0.189915 | 0.099592 | 0.101668 | 0.088325 | 0.096533 | 0.180222 | 0.535631 | 0.840882 | 0.001907 | -0.90609 |
| Q5T5Y3_aPVHVEPLSPVTGAVGHR_S10_T12_1          | Q5T5Y3 | CAMSAP1  | 157922 | calmodulin regulated spectrin associated protein 1            |  |  | 50:50                               |       |       | VHFVEPLSPTGVAGH | 0.135186 | 0.171191 | 0.146833 | 0.078798 | 0.099577 | 0.079607 | 0.085994 | 0.15107  | 0.569231 | 0.581994 | 0.006671 | -0.81291 |
| Q5T5Y3_sIQGEDIPDQR_S1_1                      | Q5T5Y3 | CAMSAP1  | 157922 | calmodulin regulated spectrin associated protein 1            |  |  |                                     |       | 100   | LRQKQKSIQGEDIP  | 0.16315  | 0.177016 | 0.222419 | 0.122429 | 0.127478 | 0.137926 | 0.129278 | 0.187528 | 0.689377 | 0.122059 | 0.034396 | -0.53663 |
| Q5T5Y3_rPQASQPTFAlHHAAscEVDPSGDSISLAR_S17_1  | Q5T5Y3 | CAMSAP1  | 157922 | calmodulin regulated spectrin associated protein 1            |  |  |                                     |       | 99.96 | FAlHHAAscEVDPRR | 0.177129 | 0.202048 | 0.22914  | 0.101002 | 0.119081 | 0.105957 | 0.106868 | 0.202772 | 0.53597  | 0.228493 | 0.004138 | -0.89978 |
| Q5TxC8_ITVQAsPNLdk_S6_1                      | Q5TxC8 | MAP3K21  | 84451  | mitogen-activated protein kinase kinase 21                    |  |  |                                     |       | 100   | HKITVQASPNLdk   | 0.174755 | 0.221753 | 0.14646  | 0.073971 | 0.126841 | 0.082829 | 0.094547 | 0.180899 | 0.522389 | 0.713275 | 0.03426  | -0.9368  |
| Q5TGY3_kAsGTAGPPTSAIPAQR_S3_1                | Q5TGY3 | AHDC1    | 27245  | AT-hook DNA binding motif containing 1                        |  |  |                                     |       | 100   | RPESRKASGTAGP   | 0.226563 | 0.244901 | 0.248533 | 0.108828 | 0.113702 | 0.121999 | 0.114843 | 0.239999 | 0.478514 | 0.484555 | 8.87E-05 | -1.06337 |
| Q5VSL9_aAsPPASADLIEQQQK_S3_1                 | Q5VSL9 | STRIP1   | 85369  | striatin interacting protein 1                                |  |  |                                     |       | 100   | IRNMRAAsPPASADL | 0.170095 | 0.167157 | 0.167367 | 0.125422 | 0.133881 | 0.115449 | 0.124918 | 0.168206 | 0.742646 | 0.061173 | 0.003123 | -0.42925 |
| Q5VT52_dAPHLTPVdLNSPFTK_S8_1                 | Q5VT52 | RPRD2    | 23248  | regulation of nuclear pre-mRNA domain containing 2            |  |  |                                     |       | 100   | DAPHTLPSVdLNSP  | 0.223039 | 0.219591 | 0.223691 | 0.074828 | 0.084469 | 0.08657  | 0.081956 | 0.220894 | 0.371019 | 0.639518 | 5.9E-06  | -1.43044 |
| Q5VT52_nTGVSPASRPSPGTPTSPNSLTLGK_S11_1       | Q5VT52 | RPRD2    | 23248  | regulation of nuclear pre-mRNA domain containing 2            |  |  |                                     |       | 76.32 | VSPASRPSPGTPTSP | 0.183071 | 0.211241 | 0.177637 | 0.074931 | 0.117    | 0.142948 | 0.111626 | 0.19605  | 0.585505 | 0.432816 | 0.024236 | -0.77225 |
| Q5VT52_nTGVSPASRPSPGTPTSPNSLTLGK_S17_1       | Q5VT52 | RPRD2    | 23248  | regulation of nuclear pre-mRNA domain containing 2            |  |  |                                     |       | 81.88 | PSPTGPTSPNSLTLG | 0.177781 | 0.189473 | 0.179472 | 0.075227 | 0.113584 | 0.14146  | 0.110091 | 0.182242 | 0.604089 | 0.069703 | 0.020983 | -0.72717 |
| Q5VT52_nTGVSPASRPSPGTPTSPNSLTLGK_S5_1        | Q5VT52 | RPRD2    | 23248  | regulation of nuclear pre-mRNA domain containing 2            |  |  |                                     |       | 82.74 | VKMNTGVSPNSLTLG | 0.224971 | 0.203886 | 0.177142 | 0.097248 | 0.128638 | 0.136266 | 0.120717 | 0.202    | 0.597161 | 0.853407 | 0.011273 | -0.74272 |
| Q5VT52_nTGVSPASRPSPGTPTSPNSLTLGK_S8_1        | Q5VT52 | RPRD2    | 23248  | regulation of nuclear pre-mRNA domain containing 2            |  |  |                                     |       | 48.54 | NITGVSPASRPSPGT | 0.155268 | 0.165521 | 0.141801 | 0.095184 | 0.084776 | 0.118459 | 0.099473 | 0.154197 | 0.645103 | 0.644829 | 0.010625 | -0.6324  |
| Q5VT52_rmsGEPiQTVEsIR_S3_1                   | Q5VT52 | RPRD2    | 23248  | regulation of nuclear pre-mRNA domain containing 2            |  |  |                                     |       | 100   | SANRMSGEPiQTVE  | 0.227759 | 0.291876 | 0.294812 | 0.093565 | 0.105253 | 0.106725 | 0.101848 | 0.271482 | 0.375154 | 0.069889 | 0.019659 | -1.41444 |
| Q5VT52_rmsGEPiQTVEsIR_VK_S3_1                | Q5VT52 | RPRD2    | 23248  | regulation of nuclear pre-mRNA domain containing 2            |  |  |                                     |       | 100   | SANRMSGEPiQTVE  | 0.196531 | 0.188897 | 0.168627 | 0.114311 | 0.130611 | 0.112106 | 0.11901  | 0.184685 | 0.644393 | 0.658847 | 0.002958 | -0.63399 |
| Q5VT52_sGTPQDDEMMDkPTSSVDTMSLLSK_S1_T3_1     | Q5VT52 | RPRD2    | 23248  | regulation of nuclear pre-mRNA domain containing 2            |  |  | 44.64,44.64                         |       |       | TVPRDDEMMDkPTSS | 0.179459 | 0.186934 | 0.168457 | 0.138733 | 0.139856 | 0.123342 | 0.139777 | 0.182788 | 0.751486 | 0.992754 | 0.004234 | -0.41218 |
| Q5VTR2_sGALLQsGSTEDPKDPAELKDPDSEDLSSQSSAK_S3 | Q5VTR2 | RNF20    | 56254  | ring finger protein 20                                        |  |  |                                     |       | 60.64 | ALLQsGSTEDPKDPA | 0.14112  | 0.181528 | 0.199246 | 0.069808 | 0.133017 | 0.098872 | 0.102065 | 0.173965 | 0.576355 | 0.926226 | 0.034423 | -0.79497 |
| Q5VU92_kAPAVeADAEsPQLGAADGEGPPLLKR_S12_1     | Q5VU92 | DCAF12L1 | 139170 | DBD1 and CUL4 associated factor 12 like 1                     |  |  |                                     |       | 84.54 | VEADAEsPQLGAADG | 0.192782 | 0.17187  | 0.193992 | 0.151573 | 0.128582 | 0.142449 | 0.140688 | 0.186214 | 0.756483 | 0.928384 | 0.09863  | -0.40262 |
| Q5VUA4_dIsPEKFDLGGPPGVPEPPQLDlQcK_S3_1       | Q5VUA4 | ZNF318   | 24149  | zinc finger protein 318                                       |  |  |                                     |       | 87.51 | SPTSRDlSPEKFDL  | 0.160885 | 0.222183 | 0.249428 | 0.122271 | 0.132067 | 0.091437 | 0.115258 | 0.213322 | 0.540531 | 0.415564 | 0.021809 | -0.88755 |
| Q5VUA4_eAHSHNTLSEVSHPHPPSPVDVPLLTk_S9_S13_2  | Q5VUA4 | ZNF318   | 24149  | zinc finger protein 318                                       |  |  | 81.97,94.25                         |       |       | IRNMRTSHSEVSHPH | 0.211608 | 0.227868 | 0.200529 | 0.190939 | 0.135579 | 0.151371 | 0.129496 | 0.213426 | 0.746377 | 0.041476 | -0.42202 |          |
| Q5VUA4_hTDFLPHERASQDGsGFP_S12_1              | Q5VUA4 | ZNF318   | 24149  | zinc finger protein 318                                       |  |  |                                     |       | 50.01 | hTDFLPHERASQDG  | 0.193778 | 0.178843 | 0.165524 | 0.143252 | 0.130147 | 0.102288 | 0.125229 | 0.193808 | 0.698102 | 0.627171 | 0.020568 | -0.51849 |
| Q5VUA4_sDSTSSPNSASQELHQDEGLVAAPVINSKPIA_S10  | Q5VUA4 | ZNF318   | 24149  | zinc finger protein 318                                       |  |  | 51616.51620.51621.28.93;28.93;28.93 |       |       | SSTSSPNSASQELHQ | 0.129156 | 0.159535 | 0.181134 | 0.112838 | 0.122117 | 0.101773 | 0.112243 | 0.160935 | 0.715796 | 0.623252 | 0.04966  | -0.48238 |
| Q5VW41_gHGKsKDDPQLQIEQR_S5_1                 | Q5VW41 | ARHGFE16 | 27237  | Rho guanine nucleotide exchange factor 16                     |  |  |                                     |       | 100   | RKRHGKsKDDPQLQ  | 0.153817 | 0.162363 | 0.159326 | 0.13583  | 0.103672 | 0.115384 | 0.118296 | 0.158502 | 0.746335 | 0.13322  | 0.014437 | -0.42211 |
| Q5VWC4_nAMGASQATk_S5_1                       | Q5VWC4 | PSMD4    | 5710   | proteasome 26S subunit, non-ATPase 4                          |  |  |                                     |       | 100   | IRNAMGASQATk    | 0.193368 | 0.18329  | 0.175707 | 0.133104 | 0.128447 | 0.078288 | 0.11328  | 0.184121 | 0.615245 | 0.156646 | 0.011904 | -0.70077 |
| Q5VWJ9_sFGDKDLPNGGTPAGTSSPASSSLLNR_S1_1      | Q5VWJ9 | SNX30    | 401548 | sorting nexin family member 30                                |  |  |                                     |       | 100   | PLDLMARsFGDKDLP | 0.229587 | 0.198635 | 0.293063 | 0.151653 | 0.141221 | 0.156421 | 0.149765 | 0.240429 | 0.622909 | 0.050833 | 0.032268 | -0.68291 |
| Q5VZ89_rSlylYgAK_S3_1                        | Q5VZ89 | DENN24C  | 55667  | DENN domain containing 4C                                     |  |  |                                     |       | 100   | DLRNLKslylYgAK  | 0.250482 | 0.225675 | 0.216949 | 0.081208 | 0.107118 | 0.084898 | 0.091074 | 0.230325 | 0.394202 | 0.787186 | 0.000409 | -1.34299 |
| Q5VZ89_rSlylYgAK_T2_1                        | Q5VZ89 | DENN24C  | 55667  | DENN domain containing 4C                                     |  |  |                                     |       | 13.24 | DLRNLKslylYgAK  | 0.326045 | 0.229682 | 0.28267  | 0.094154 | 0.116777 | 0.163716 | 0.124883 | 0.279466 | 0.446861 | 0.701743 | 0.011076 | -1.1621  |
| Q5VZ89_rSlylYgAK_S3_1                        | Q5VZ89 | DENN24C  | 55667  | DENN domain containing 4C                                     |  |  |                                     |       | 99.83 | SSlYKVSlylYgAK  | 0.157485 | 0.201992 | 0.185227 | 0.079852 | 0.109377 | 0.103962 | 0.09773  | 0.181568 | 0.538257 | 0.656801 | 0.006111 | -0.89363 |
| Q5VZL5_aNqVETLHTLHPQIPETNFR_T16_T19_1        | Q5VZL5 | ZMYM4    | 9202   | zinc finger MYM-type containing 4                             |  |  | 7217.7220                           | 50:50 |       | LHTLHPQIPETNFR  | 0.258907 | 0.181021 | 0.155506 | 0.081352 | 0.084019 | 0.103821 | 0.089731 | 0.165144 | 0.543348 | 0.879583 | 0.002127 | -0.88005 |
| Q5VZL5_ksivVAIEPR_S3_1                       | Q5VZL5 | ZMYM4    | 9202   | zinc finger MYM-type containing 4                             |  |  |                                     |       | 100   | RRRKRKsivVAIEPR | 0.155949 | 0.174361 | 0.150969 | 0.119103 | 0.131724 | 0.098688 | 0.116505 | 0.226943 | 0.513368 | 0.118362 | 0.049242 | -0.96193 |
| Q632Y3_eRVPsVAEPQLRPAGTAAAK_S5_1             | Q632Y3 | KANK2    | 25959  | KN motif and ankyrin repeat domains 2                         |  |  |                                     |       | 100   | EPREVPsVAEPQLR  | 0.206504 | 0.208711 | 0.210849 | 0.128163 | 0.122731 | 0.159777 | 0.136891 | 0.206868 | 0.655958 | 0.023311 | 0.023811 | -0.60832 |
| Q641Q2_gLfsDEEDSDFSSQSAK_S4_1                | Q641Q2 | WASHC2A  | 387680 | WASH complex subunit 2A                                       |  |  |                                     |       | 93.94 | KQKGLfsDEEDSDF  | 0.170587 | 0.17276  | 0.17051  | 0.134727 | 0.138853 | 0.104091 | 0.12859  | 0.130883 | 0.747234 | 0.041054 | 0.037866 | -0.4559  |
| Q641Q2_gPIAQWDGASIPNGHRPQLR_S12_1            | Q641Q2 | WASHC2A  | 387680 | WASH complex subunit 2A                                       |  |  |                                     |       | 100   | WADGASIPNGHRP   | 0.171573 | 0.191658 | 0.175691 | 0.115324 | 0.148988 | 0.116682 | 0.127044 | 0.19764  | 0.707214 | 0.474675 | 0.013883 | -0.49978 |
| Q641Q2_kTslFEEDSDlFAIAk_S3_1                 | Q641Q2 | WASHC2A  | 387680 | WASH complex subunit 2A                                       |  |  |                                     |       | 93.94 | AKAWKtSLFEEDSD  | 0.202475 | 0.205586 | 0.175735 | 0.117758 | 0.116632 | 0.103738 | 0.112709 | 0.195499 | 0.579187 | 0.361787 | 0.001452 | -0.7879  |
| Q641Q2_kTslFEEDSDlFAIAk_T2_S3_1              | Q641Q2 | WASHC2A  | 387680 | WASH complex subunit 2A                                       |  |  |                                     |       | 100   | EAKWtSLFEEDSD   | 0.186912 | 0.22137  | 0.157228 | 0.115894 | 0.103848 | 0.066793 | 0.095512 | 0.188403 | 0.506684 | 0.717138 | 0.017198 | -0.98084 |
| Q641Q2_rSRTSFADELAAR_S2_1                    | Q641Q2 | WASHC2A  | 387680 | WASH complex subunit 2A                                       |  |  |                                     |       | 98.72 | ENTRKRrSRTSFA   | 0.199073 | 0.191721 | 0.177543 | 0.139766 | 0.136212 | 0.121195 | 0.132391 | 0.129856 | 0.866834 | 0.895861 | 0.002569 | -0.51698 |
| Q641Q2_rSRTSFADELAAR_T5_S6_1                 | Q641Q2 | WASHC2A  | 387680 | WASH complex subunit 2A                                       |  |  |                                     |       | 100   | RKRKRrSRTSFADE  | 0.210331 | 0.168285 | 0.187655 | 0.133544 | 0.148145 | 0.137752 | 0.139814 | 0.188757 | 0.740709 | 0.226239 | 0.01921  | -0.43302 |
| Q641Q2_rTSPDDEENLFAPk_T2_S4_1                | Q641Q2 | WASHC2A  |        |                                                               |  |  |                                     |       |       |                 |          |          |          |          |          |          |          |          |          |          |          |          |

|        |                                             |        |                                                        |                   |                         |                            |                      |          |          |          |          |          |          |          |          |          |          |          |          |
|--------|---------------------------------------------|--------|--------------------------------------------------------|-------------------|-------------------------|----------------------------|----------------------|----------|----------|----------|----------|----------|----------|----------|----------|----------|----------|----------|----------|
| Q6KC79 | qncDAPVSLQEDIVGSLKSPENHPETPK_s17_S20_Q6KC79 | NIPBL  | 25836 NIPBL, cohesin loading factor                    | 5588.S591.T592    | 31.32;31.32;31.32       | LQEDIVGSLKSPEN.DI          | 0.162793             | 0.207991 | 0.202006 | 0.110525 | 0.152295 | 0.118686 | 0.127169 | 0.19093  | 0.666048 | 0.896899 | 0.028819 | -0.5863  |          |
| Q6MZP7 | IaisPllkSnK_s4_S8_2                         | Q6MZP7 | 132660 lin-54 DREAM MuvB core complex component        | S310.S314         | 100;100                 | TPNKIAISPLKSPNK.IA         | 0.1504               | 0.177776 | 0.15558  | 0.128609 | 0.111021 | 0.098345 | 0.112658 | 0.161252 | 0.698647 | 0.955924 | 0.016114 | -0.51736 |          |
| Q6NZY4 | gppTVPFPPLK_T2_1                            | Q6NZY4 | 55596 zinc finger CCHC-type containing 8               | T479              |                         | 100 TPPLPRGTFPPVPTF        | 0.163453             | 0.194918 | 0.226681 | 0.076292 | 0.105332 | 0.081395 | 0.087673 | 0.194997 | 0.44961  | 0.388377 | 0.006156 | -1.15235 |          |
| Q6P0N0 | nIkskSPR_S6_1                               | Q6P0N0 | 55320 MIS18B binding protein 1                         | S365              |                         | 92.84 KRNIGKSLSPFRIFK      | 0.164515             | 0.215931 | 0.169699 | 0.107709 | 0.134346 | 0.094223 | 0.11170  | 0.183472 | 0.609301 | 0.664528 | 0.022914 | -0.71477 |          |
| Q6P0O8 | nIkskGASPLTIAgk_S10_1                       | Q6P0O8 | 21319 microtubule associated serine/threonine kinase 2 | S151              |                         | 93.83 SLGQSAPSLTALQTE      | 0.213581             | 0.154791 | 0.182671 | 0.075706 | 0.117526 | 0.095164 | 0.096329 | 0.138261 | 0.532364 | 0.672311 | 0.013662 | -0.93411 |          |
| Q6P0O8 | nIkskGASPLTIAgk_S7_S10_1                    | Q6P0O8 | 21319 microtubule associated serine/threonine kinase 2 | S151              | 44.5148.S151            | 33.33;33.33;33.33          | LVNRMQSLGQSAPSLTIA   | 0.191811 | 0.170116 | 0.169163 | 0.074118 | 0.121539 | 0.085871 | 0.093843 | 0.17703  | 0.530095 | 0.424036 | 0.00661  | -0.91568 |
| Q6P0O8 | nIkskGASPLTIAgk_S7_S10_1                    | Q6P0O8 | 21319 microtubule associated serine/threonine kinase 2 | S151              | 5144.S151               | 49.91;49.91                | LRNQLSQSAPSLTIAgk.SI | 0.163023 | 0.160643 | 0.162873 | 0.062604 | 0.1187   | 0.086665 | 0.089323 | 0.154039 | 0.579872 | 0.238309 | 0.032157 | -0.78619 |
| Q6P158 | rSPRSnSNIsk_S6_1                            | Q6P158 | 90957 DKH-X box helicase 57                            | S77               |                         | 97.03 SRRPSPFNNSNIsk       | 0.222364             | 0.154392 | 0.220451 | 0.130222 | 0.113012 | 0.1188   | 0.120678 | 0.190969 | 0.606212 | 0.097400 | 0.026739 | -0.72211 |          |
| Q6P4F7 | rQsVGDVFSmNk_S3_1                           | Q6P4F7 | 9824 Rho GTPase activating protein 11A                 | S285              |                         | 0.218048                   | 0.187659             | 0.141348 | 0.071896 | 0.090388 | 0.07573  | 0.102621 | 0.182352 | 0.450894 | 0.525215 | 0.01373  | 0.14914  |          |          |
| Q6P4R8 | kCsLAALVDLAVLk_S3_1                         | Q6P4R8 | 4798 nuclear factor related to kappaB binding protein  | S298              |                         | 100 VAGNRKSLALAYDLD        | 0.218399             | 0.221672 | 0.186711 | 0.102059 | 0.133793 | 0.124646 | 0.120669 | 0.208927 | 0.575156 | 0.834204 | 0.003701 | -0.79797 |          |
| Q6PCE3 | aVAgvNmtAsHNR_S10_1                         | Q6PCE3 | 283209 phosphoglucomutase 2 like 1                     | S175              |                         | 0.135184                   | 0.160934             | 0.156432 | 0.109645 | 0.102762 | 0.107817 | 0.106741 | 0.15085  | 0.707599 | 0.125935 | 0.007070 | -0.499   |          |          |
| Q6PFW1 | kAGsMEVLSSETSSRPGGYR_S12_1                  | Q6PFW1 | 9677 diphosphoinositol pentakisphosphate kinase 1      | S985              |                         | 49.7 MEVLSSETSSRPGGY       | 0.176613             | 0.249013 | 0.201555 | 0.124932 | 0.149501 | 0.126454 | 0.133629 | 0.209061 | 0.639189 | 0.245777 | 0.029189 | -0.64569 |          |
| Q6PFW1 | kAGsMEVLSSETSSRPGGYR_S4_1                   | Q6PFW1 | 9677 diphosphoinositol pentakisphosphate kinase 1      | S985              |                         | 100 IRLNKRSLSGSLP          | 0.176213             | 0.247081 | 0.191809 | 0.116475 | 0.145955 | 0.10392  | 0.122116 | 0.205035 | 0.955958 | 0.502715 | 0.028918 | -0.74761 |          |
| Q6PFW1 | qSGLGQsTGLFSTTVLGGSSAPNLQDAR_S22_1          | Q6PFW1 | 9677 diphosphoinositol pentakisphosphate kinase 1      | S1037             |                         | 89.36 TVLGGSSAPNLQDQ       | 0.147397             | 0.187784 | 0.193478 | 0.099217 | 0.10163  | 0.115279 | 0.105375 | 0.17622  | 0.597976 | 0.122441 | 0.098899 | -0.74184 |          |
| Q6PFW1 | lHSPNLFLQQR_S4_1                            | Q6PFW1 | 9677 diphosphoinositol pentakisphosphate kinase 1      | S1152             |                         | 0.201688                   | 0.240686             | 0.192734 | 0.108865 | 0.13341  | 0.118029 | 0.120101 | 0.211703 | 0.56731  | 0.382727 | 0.05006  | 0.00026  | -0.81779 |          |
| Q6PGN9 | rEsTnLFLPAsk_S3_1                           | Q6PGN9 | 55269 paraspeckle component 1                          | S175              |                         | 99.48 SPNKKRSPNTCLNDF      | 0.156399             | 0.159252 | 0.195121 | 0.098037 | 0.136829 | 0.110247 | 0.115038 | 0.170257 | 0.67567  | 0.915688 | 0.03099  | -0.56561 |          |
| Q6PID6 | sEAPAEVTHFsPk_S11_1                         | Q6PID6 | 23548 tetratricopeptide repeat domain 33               | S197              |                         | 100 PAEVTHFsPKSIPLD        | 0.173607             | 0.172677 | 0.149965 | 0.107066 | 0.130346 | 0.127242 | 0.121551 | 0.165416 | 0.734821 | 0.942515 | 0.01454  | -0.44454 |          |
| Q6PIG6 | gSNTAASAEATLPR_T5_S7_1                      | Q6PIG6 | 221927 BRCA1 associated ATM activator 1                | T745.S747         | 47.34;47.34             | EAARGSPNTAASAEATL.RG       | 0.14698              | 0.156058 | 0.190389 | 0.111482 | 0.124453 | 0.092567 | 0.109501 | 0.164476 | 0.665756 | 0.680164 | 0.027116 | -0.58623 |          |
| Q6PIJ7 | IRTSQTEALVEVQGSR_S4_1                       | Q6PIJ7 | 79882 zinc finger CCHC-type containing 14              | S390              |                         | 107083 VAPTRTSQTEALVE      | 0.170383             | 0.185026 | 0.172023 | 0.08882  | 0.083534 | 0.101134 | 0.091163 | 0.175204 | 0.520322 | 0.942615 | 0.00302  | -0.94692 |          |
| Q6PIW8 | kcsTQLLVEDPKEGGATTK_S4_1                    | Q6PIW8 | 163882 consorin, connexin sorting protein              | S293              |                         | 89.3 KQERKCSQTLLVSE        | 0.134942             | 0.21733  | 0.172663 | 0.075451 | 0.096979 | 0.084663 | 0.086598 | 0.174978 | 0.494905 | 0.161632 | 0.023617 | -1.01478 |          |
| Q6PIW8 | kcsTQLLVEDPKEGGATTK_T4_1                    | Q6PIW8 | 163882 consorin, connexin sorting protein              | S293              |                         | 91.31 SQERKCSQTLLVSE       | 0.159344             | 0.216231 | 0.187953 | 0.059933 | 0.091089 | 0.1051   | 0.097374 | 0.187843 | 0.518381 | 0.117803 | 0.030908 | -0.94792 |          |
| Q6PKG0 | avVPTTKTEVSNk_T3_1                          | Q6PKG0 | 23367 LA ribonucleoprotein domain family member 1      | T526              |                         | 99.97 PGSPRAVVTPTTKTE      | 0.169474             | 0.230082 | 0.187048 | 0.109805 | 0.134727 | 0.104322 | 0.116285 | 0.195355 | 0.594701 | 0.425302 | 0.017452 | -0.74976 |          |
| Q6PKG0 | csSQSSSRPAAMISQPTTGPQVPR_S3_1               | Q6PKG0 | 23367 LA ribonucleoprotein domain family member 1      | S1056             |                         | 96.45 EGRKRCFSQSSSRPA      | 0.201569             | 0.163718 | 0.21598  | 0.109621 | 0.106146 | 0.107533 | 0.193535 | 0.554996 | 0.931487 | 0.070889 | -0.84945 |          |          |
| Q6PKG0 | csQSSSRPAAMISQPTTGPVREDAK_S3_1              | Q6PKG0 | 23367 LA ribonucleoprotein domain family member 1      | S1056             |                         | 66.03 EGRKRCFSQSSSRPA      | 0.213126             | 0.230448 | 0.207443 | 0.108432 | 0.129554 | 0.114843 | 0.11761  | 0.210037 | 0.541966 | 0.899155 | 0.004839 | -0.88373 |          |
| Q6PKG0 | csQSSSRPAAMISQPTTGPVREDAK_S3_1              | Q6PKG0 | 23367 LA ribonucleoprotein domain family member 1      | S1056.S1058       | 40.91;40.91             | 60.67 EGRKRCFSQSSSRPA.RKI  | 0.244145             | 0.183384 | 0.212183 | 0.118008 | 0.113047 | 0.112772 | 0.114609 | 0.216306 | 0.52977  | 0.018397 | 0.022049 | -0.91656 |          |
| Q6PKG0 | gskVGDGDAINWPTPGIAHk_S2_1                   | Q6PKG0 | 23367 LA ribonucleoprotein domain family member 1      | S1056             |                         | 100 VPKRGKCSKVGDGFD        | 0.183399             | 0.255995 | 0.150732 | 0.09311  | 0.073755 | 0.122108 | 0.096324 | 0.196709 | 0.49868  | 0.388898 | 0.042348 | -1.03009 |          |
| Q6PKG0 | csQSSSRPAAMISQPTTGPVREDAK_S4_1              | Q6PKG0 | 23367 LA ribonucleoprotein domain family member 1      | S1056             |                         | 60.67 EGRKRCFSQSSSRPA      | 0.227634             | 0.18598  | 0.203925 | 0.108439 | 0.148557 | 0.121003 | 0.125999 | 0.208467 | 0.612104 | 0.926791 | 0.09155  | -0.70815 |          |
| Q6PKG0 | csQSSSRPAAMISQPTTGPVREDAK_S4_S6_Q6PKG0      | Q6PKG0 | 23367 LA ribonucleoprotein domain family member 1      | S1056.S1058.S1055 | 24.61;24.61;24.61;24.61 | 60.67 EGRKRCFSQSSSRPA.RKI  | 0.228063             | 0.205054 | 0.189747 | 0.124314 | 0.150725 | 0.116696 | 0.120578 | 0.207621 | 0.628926 | 0.922240 | 0.07097  | -0.66904 |          |
| Q6PKG0 | csQSSSRPAAMISQPTTGPVREDAK_S6_S7_Q6PKG0      | Q6PKG0 | 23367 LA ribonucleoprotein domain family member 1      | S1058.S1059.S1060 | 30.58;30.58;30.58       | 91.31 KRKRCFSQSSSRPAAM.RKI | 0.194841             | 0.194532 | 0.192638 | 0.110879 | 0.150308 | 0.105527 | 0.132238 | 0.195217 | 0.626168 | 0.923749 | 0.033816 | -0.67538 |          |
| Q6PKG0 | csQSSSRPAAMISQPTTGPVREDAK_S7_S8_Q6PKG0      | Q6PKG0 | 23367 LA ribonucleoprotein domain family member 1      | S1059.S1060       | 40.15;40.15             | 99.97 KRKRCFSQSSSRPAAM.RKI | 0.256519             | 0.197482 | 0.231638 | 0.144295 | 0.146394 | 0.133154 | 0.141281 | 0.230056 | 0.614114 | 0.106614 | 0.00755  | -0.70342 |          |
| Q6PKG0 | csQSSSRPAAMISQPTTGPVREDAK_S7_S8_Q6PKG0      | Q6PKG0 | 23367 LA ribonucleoprotein domain family member 1      | S1059.S1060.S1067 | 29.17;29.17;29.17       | 91.31 KRKRCFSQSSSRPAAM.RKI | 0.274479             | 0.199959 | 0.231335 | 0.148446 | 0.155708 | 0.129001 | 0.144385 | 0.235258 | 0.617332 | 0.239779 | 0.168866 | -0.70432 |          |
| Q6PKG0 | lPTVPSrPNYR_S19_S9_2                        | Q6PKG0 | 23367 LA ribonucleoprotein domain family member 1      | S766.S774         | 96.72;86.12             | 99.97 EPTIARSLLPTTVPTE.LP  | 0.192231             | 0.184708 | 0.175695 | 0.130203 | 0.129711 | 0.134725 | 0.131546 | 0.184242 | 0.713988 | 0.198592 | 0.000481 | -0.86603 |          |
| Q6PKG0 | IASISrSPEGTPTVGSyGTQPSk_S5_S6_1             | Q6PKG0 | 23367 LA ribonucleoprotein domain family member 1      | S489.S850         | 39.43;39.43             | 99.97 RFRSTIASISrSPEGTF.PP | 0.167443             | 0.194649 | 0.162638 | 0.097511 | 0.135    | 0.098495 | 0.110335 | 0.14791  | 0.630813 | 0.789918 | 0.0152   | -0.66472 |          |
| Q6PKG0 | lPRrPQLk_T1_T4_T7_2                         | Q6PKG0 | 23367 LA ribonucleoprotein domain family member 1      | T782.T785.T788    | 66.67;66.67;66.67       | 100 RPNRNrPPrPQLk.RN       | 0.158518             | 0.19322  | 0.180247 | 0.143929 | 0.116555 | 0.091172 | 0.117218 | 0.173299 | 0.661024 | 0.61269  | 0.540303 | -0.59723 |          |
| Q6PL18 | ATAD2                                       | Q6PL18 | 29028 ATPase family, AAA domain containing 2           | S1302             |                         | 100 RMYNRrATAD2            | 0.186448             | 0.203827 | 0.187478 | 0.100955 | 0.114173 | 0.082292 | 0.09914  | 0.192825 | 0.514785 | 0.930615 | 0.000991 | -0.95796 |          |
| Q6PL18 | rSRyGNQSMFLDK_S4_1                          | Q6PL18 | 29028 ATPase family, AAA domain containing 2           | S1302             |                         | 99.81 CRIRSRyGNQSMFLDK     | 0.146331             | 0.110915 | 0.143076 | 0.06812  | 0.071764 | 0.087576 | 0.07582  | 0.133441 | 0.568192 | 0.436485 | 0.010759 | -0.81555 |          |
| Q6RFH5 | kLsgEAGQALQTR_S3_1                          | Q6RFH5 | 54663 WD repeat domain 74                              | S165              |                         | 100 AAAkRLsgEAGQALQTR      | 0.20641              | 0.235186 | 0.24017  | 0.108319 | 0.101856 | 0.100678 | 0.095284 | 0.23999  | 0.41071  | 0.977414 | 8.26E-05 | -1.28381 |          |
| Q6UB98 | rMSPVIEHTk_S3_1                             | Q6UB98 | 23253 ankyrin repeat domain 12                         | S1311             |                         | 94.3 TLTVRrMSPVIEHTk       | 0.196554             | 0.183704 | 0.170906 | 0.109831 | 0.129737 | 0.112686 | 0.117418 | 0.183718 | 0.63912  | 0.827058 | 0.002364 | -0.64584 |          |
| Q6UUV7 | ITQYhGSrNPLVQL_S8_1                         | Q6UUV7 | 64784 CREB regulated transcription coactivator 3       | S62               |                         | 99.99 LTQYhGSrNPLVQL       | 0.204525             | 0.234188 | 0.173223 | 0.081296 | 0.130217 | 0.107644 | 0.106386 | 0.203978 | 0.521555 | 0.792423 | 0.012418 | -0.93911 |          |
| Q6UUV7 | sNPSIQATLk_S1_1                             | Q6UUV7 | 64784 CREB regulated transcription coactivator 3       | S329              |                         | 100 SGLQSSrNPSIQATL        | 0.26094              | 0.219372 | 0.196618 | 0.122514 | 0.145468 | 0.09458  | 0.120854 | 0.225643 | 0.535599 | 0.758153 | 0.01813  | -0.90078 |          |
| Q6UUV7 | sNPSIQATLk_S1_1                             | Q6UUV7 | 64784 CREB regulated transcription coactivator 3       | S329.S332         | 50;50                   | 100 SGLQSSrNPSIQATL.QS     | 0.340648             | 0.223427 | 0.247886 | 0.141383 | 0.121882 | 0.097502 | 0.120256 | 0.270653 | 0.444315 | 0.224445 | 0.016551 | -1.17034 |          |
| Q6UWD8 | rRPGSPDPEWGLQPR_S6_1                        | Q6UWD8 | 283897 chromosome 16 open reading frame 54             | S194              |                         | 100 ARRRPGSPDPEWGL         | 0.230528             | 0.213634 | 0.196939 | 0.150904 | 0.157444 | 0.167008 | 0.158478 | 0.2137   | 0.741591 | 0.980487 | 0.068663 | -0.4313  |          |
| Q6WKZ4 | nNmTAsFDLSmK_S6_1                           | Q6WKZ4 | 80223 RAB11 family interacting protein 1               | S156              |                         | 100 MRNMNTAsFDLSMk         | 0.244743             | 0.202862 | 0.168767 | 0.073029 | 0.091854 | 0.071929 | 0.079897 | 0.205547 | 0.384203 | 0.154188 | 0.00244  | -1.38006 |          |
| Q6WKZ4 | nNmTAsFDLSmK_T4_1                           | Q6WKZ4 | 80223 RAB11 family interacting protein 1               | T154              |                         | 90.67 QMNMNTAsFDLSMk       | 0.24756              | 0.193313 | 0.196844 | 0.087341 | 0.106808 | 0.087048 | 0.093703 | 0.212572 | 0.400994 | 0.246416 | 0.003144 | -1.18133 |          |
| Q6WKZ4 | nNmTAsFDLSmK_T4_S6_1                        | Q6WKZ4 | 80223 RAB11 family interacting protein 1               | S156              | 50;50                   | 100 QMNMNTAsFDLSMk.MRI     | 0.22242              | 0.214566 | 0.160594 | 0.067013 | 0.104074 | 0.072001 | 0.081133 | 0.191993 | 0.406789 | 0.524269 | 0.06428  | -1.29765 |          |
| Q6WKZ4 | qSSNLFDVQIETPEAESK_S4_1                     | Q6WKZ4 | 80223 RAB11 family interacting protein 1               | S500.S501         | 50;50                   | 100 AVSRQSSNLFDVQIET       | 0.212965             | 0.198712 | 0.205512 | 0.088676 | 0.113047 | 0.111253 | 0.104325 | 0.20573  | 0.507098 | 0.432008 | 0.003342 | -0.97966 |          |
| Q6WKZ4 | qSSNLFDVQIETPEAESK_S4_1                     | Q6WKZ4 | 80223 RAB11 family interacting protein 1               | S501              |                         | 92.32 KPPSRrSSNLFDVQI      | 0.218572             | 0.172806 | 0.172078 | 0.077233 | 0.09667  | 0.092393 | 0.088765 | 0.187819 | 0.772362 | 0.152640 | 0.003849 | -1.08127 |          |
| Q6WKZ4 | rSLLSLMTGk_S3_1                             | Q6WKZ4 | 80223 RAB11 family interacting protein 1               | S434.S435         | 49.99;49.99             | 95.22 KPSPSRrSLLSLMTG      | 0.182285             | 0.191292 | 0.188742 | 0.064602 | 0.08401  | 0.074064 | 0.074225 | 0.18744  | 0.395994 | 0.372444 | 5.33E-05 | -1.33645 |          |
| Q6WKZ4 | rSLLSLMTGk_S3_1                             | Q6WKZ4 | 80223 RAB11 family interacting protein 1               | S435              |                         | 95.22 KPPSRrSLLSLMTG       | 0                    |          |          |          |          |          |          |          |          |          |          |          |          |

|                                              |        |          |        |                                                              |                                     |             |                   |          |          |          |          |          |          |          |          |          |          |          |          |
|----------------------------------------------|--------|----------|--------|--------------------------------------------------------------|-------------------------------------|-------------|-------------------|----------|----------|----------|----------|----------|----------|----------|----------|----------|----------|----------|----------|
| Q722W4_FFQGSQEFLASASAEER_S5_1                | Q722W4 | ZC3HAV1  | 56829  | zinc finger CCH-type containing, antiviral 1                 | 5257                                | 99.83       | RDRFQGSQEFFLASA   | 0.159916 | 0.227497 | 0.214933 | 0.114661 | 0.142462 | 0.126228 | 0.127784 | 0.200782 | 0.636431 | 0.262331 | 0.030536 | -0.65192 |
| Q722Z1_hksIAEVSNLR_S3_1                      | Q722Z1 | TICRR    | 90381  | TOPBP1 interacting checkpoint and replication regulator 5865 | 5785                                | 100         | NALIRKHSIAEVSQNL  | 0.336523 | 0.273562 | 0.157777 | 0.051167 | 0.089831 | 0.079925 | 0.073641 | 0.255954 | 0.287712 | 0.093543 | 0.027265 | -1.7973  |
| Q722Z1_hsVSAVGDLEKLDNFk_S3_1                 | Q722Z1 | TICRR    | 90381  | TOPBP1 interacting checkpoint and replication regulator 5865 | 5785                                | 96.16       | LDLKRSHSIVAVDGL   | 0.259736 | 0.223068 | 0.150937 | 0.119303 | 0.132485 | 0.105671 | 0.119162 | 0.211058 | 0.564595 | 0.109676 | 0.049819 | -0.82471 |
| Q72333_kLEPESVLDMDVTcsQIVYNNPEK_S16_1        | Q72333 | SETX     | 23064  | senataxin                                                    | 5353                                | 90.75       | LDVAVMTCQIVYNN    | 0.235292 | 0.272551 | 0.236063 | 0.083398 | 0.104396 | 0.124982 | 0.104259 | 0.274968 | 0.420451 | 0.976222 | 0.011117 | -1.24999 |
| Q72336_hRAEVALSARfSPLQGGAPGTR_S11_1          | Q72336 | ATG9A    | 79065  | autophagy related 9A                                         | 5654                                | 82.18       | EVAASLRFLSPLOPG   | 0.206256 | 0.174893 | 0.139331 | 0.09617  | 0.074461 | 0.078335 | 0.082989 | 0.174939 | 0.478339 | 0.213592 | 0.101471 | -1.06389 |
| Q72336_hRAEVALSARfSPLQGGAPGTR_S11_1          | Q72336 | ATG9A    | 79065  | autophagy related 9A                                         | 5654.5656                           |             | EQVALSLRFLSPLOPG  | 0.215169 | 0.201142 | 0.204836 | 0.145847 | 0.097203 | 0.113814 | 0.118955 | 0.207049 | 0.574526 | 0.159162 | 0.040075 | -0.79956 |
| Q72336_hRAEVALSARfSPLQGGAPGTR_S11_1          | Q72336 | ATG9A    | 79065  | autophagy related 9A                                         | 5654.5656                           | 99.68;99.95 | EQAALVQSRFGSQSQNT | 0.156849 | 0.167336 | 0.15913  | 0.079159 | 0.127542 | 0.128579 | 0.117616 | 0.116119 | 0.693651 | 0.073807 | 0.040075 | -0.52772 |
| Q72378_nEHOISQSIVSVK_S13_1                   | Q72378 | ZFYVE16  | 9765   | zinc finger FYVE-type containing 16                          | 5946                                | 100         | SLIQSOVYFSSKLSMN  | 0.228512 | 0.204294 | 0.208668 | 0.118554 | 0.140153 | 0.160044 | 0.139584 | 0.213825 | 0.652794 | 0.557856 | 0.062246 | -0.6153  |
| Q72417_d0TSGAQMLVFLSK_S4_S5_1                | Q72417 | NUF1P2   | 57532  | NUF1P2, FMR1 interacting protein 2                           | 5607.5608                           | 47.7;47.7   | DLQ171734         | 0.204415 | 0.25013  | 0.066197 | 0.075452 | 0.075545 | 0.072398 | 0.208623 | 0.386259 | 0.346649 | 0.036469 | 0.020497 | -1.5272  |
| Q72417_dYEIENSLASPTNLGSAK_S12_T14_1          | Q72417 | NUF1P2   | 57532  | NUF1P2, FMR1 interacting protein 2                           | 5629.7631                           | 49.99;49.99 | ESQNFPLASPTNLGK   | 0.181678 | 0.205258 | 0.186284 | 0.128971 | 0.158365 | 0.130301 | 0.139212 | 0.191073 | 0.728581 | 0.723546 | 0.012149 | -0.45684 |
| Q72417_dYEIENSLASPTNLGSAK_T16_1              | Q72417 | NUF1P2   | 57532  | NUF1P2, FMR1 interacting protein 2                           | 5633                                |             | PLASPTNLGSAK      | 0.237651 | 0.228073 | 0.195086 | 0.152708 | 0.149811 | 0.14933  | 0.150617 | 0.22027  | 0.683781 | 0.013306 | 0.038185 | -0.54839 |
| Q72417_ndWSGFDLR_S3_1                        | Q72417 | NUF1P2   | 57532  | NUF1P2, FMR1 interacting protein 2                           | 5652                                |             | RGLERNDWSGFDLR    | 0.177662 | 0.203158 | 0.14279  | 0.100637 | 0.13495  | 0.092631 | 0.109406 | 0.174537 | 0.626835 | 0.709908 | 0.400351 | -0.67384 |
| Q72422_ILGSAEEEEQEKPLDRPRISQEDSRQPNNVIR_T2X  | Q72422 | ZSRD1    | 26099  | SUZ RNA binding domain containing 1                          | 7121                                |             | 6E18186           | 0.227737 | 0.247988 | 0.084948 | 0.127471 | 0.104112 | 0.105511 | 0.214637 | 0.491577 | 0.417161 | 0.013124 | -1.02451 |          |
| Q72422_rPSNGVSPNSRPTLPVK_T3_S4_1             | Q72422 | ZSRD1    | 26099  | SUZ RNA binding domain containing 1                          | 767.568                             | 50;50       | IRILKRPSTNGVSS    | 0.17535  | 0.22737  | 0.181301 | 0.122162 | 0.138986 | 0.101496 | 0.120881 | 0.194674 | 0.620942 | 0.606239 | 0.019991 | -0.68747 |
| Q72460_fSFRSQDLNPEIKR_S5_1                   | Q72460 | CLASP1   | 23332  | cytoplasmic linker associated protein 1                      | 51196                               |             | 0.161957          | 0.156542 | 0.186148 | 0.100009 | 0.13612  | 0.116212 | 0.117417 | 0.162216 | 0.72383  | 0.186855 | 0.050439 | -0.46628 |          |
| Q72460_qsGSATNVASTDNR_S2_1                   | Q72460 | CLASP1   | 23332  | cytoplasmic linker associated protein 1                      | 5646                                |             | 0.181246          | 0.174673 | 0.23624  | 0.095991 | 0.113608 | 0.096852 | 0.10215  | 0.197386 | 0.517515 | 0.158887 | 0.009439 | -0.95033 |          |
| Q72460_rSDDIVNAASAK_S3_1                     | Q72460 | CLASP1   | 23332  | cytoplasmic linker associated protein 1                      | 5606                                |             | 0.161957          | 0.156542 | 0.186148 | 0.100009 | 0.13612  | 0.116212 | 0.117417 | 0.162216 | 0.72383  | 0.186855 | 0.050439 | -0.46628 |          |
| Q72460_sSSSQSLNRLPSAK_S4_1                   | Q72460 | CLASP1   | 23332  | cytoplasmic linker associated protein 1                      | 5558                                |             | 0.245229          | 0.199718 | 0.270736 | 0.159107 | 0.142207 | 0.138696 | 0.14667  | 0.238561 | 0.614811 | 0.168522 | 0.013332 | -0.70179 |          |
| Q72474_kIPFEVEVNSPLSDVAK_S10_1               | Q72474 | HAUS6    | 54801  | HAUS augmin like complex subunit 6                           | 5507                                |             | 0.158397          | 0.134683 | 0.166163 | 0.101334 | 0.110145 | 0.116246 | 0.109424 | 0.158973 | 0.687174 | 0.214834 | 0.019677 | -0.54125 |          |
| Q72474_nQIPRPNLEITE_T6_1                     | Q72474 | HAUS6    | 54801  | HAUS augmin like complex subunit 6                           | 5507                                |             | 0.180476          | 0.211    | 0.184151 | 0.085739 | 0.129017 | 0.120518 | 0.117518 | 0.191876 | 0.582451 | 0.691212 | 0.00807  | -0.77979 |          |
| Q724V5_nQDRLRPPGDRQER_S10_1                  | Q724V5 | HDFGL2   | 84717  | HDFG like 2                                                  | 5652                                |             | 0.161007          | 0.163701 | 0.181565 | 0.135026 | 0.126241 | 0.106406 | 0.122558 | 0.198756 | 0.726235 | 0.734803 | 0.012243 | -0.46149 |          |
| Q724V5_krEGFSMDR_S3_1                        | Q724V5 | HDFGL2   | 84717  | HDFG like 2                                                  | 5454                                |             | 0.196439          | 0.212276 | 0.190168 | 0.122064 | 0.108051 | 0.083637 | 0.104584 | 0.199628 | 0.523897 | 0.511098 | 0.066689 | -0.93265 |          |
| Q72569_qEIQEQINIAmASASSPAsGSSGLPRK_S29_1     | Q72569 | BRAP     | 8315   | BRCA1 associated protein                                     | 5583                                |             | 0.216691          | 0.194426 | 0.27583  | 0.088838 | 0.081327 | 0.086508 | 0.085558 | 0.229628 | 0.373644 | 0.016565 | 0.026672 | -1.42026 |          |
| Q72589_qPIDLSQMAVPIQMTEK_T3_1                | Q72589 | EMSY     | 56946  | BRCA2-interacting transcriptional repressor                  | 7799                                |             | 0.137785          | 0.208273 | 0.202648 | 0.040713 | 0.07766  | 0.030304 | 0.049559 | 0.182902 | 0.270961 | 0.575083 | 0.076717 | -1.88384 |          |
| Q725J4_kEDLAEVEYSLLcELLSGPEQRQMGDPLSP_S31_1  | Q725J4 | RAI1     | 10743  | retinoic acid induced 1                                      | 5892                                |             | 0.212589          | 0.169076 | 0.183439 | 0.133038 | 0.144416 | 0.089386 | 0.122194 | 0.188368 | 0.6487   | 0.739306 | 0.037445 | -0.62438 |          |
| Q725J4_sSSSNASNGGGDGKEERPEGSPTLFK_S2_1       | Q725J4 | RAI1     | 10743  | retinoic acid induced 1                                      | 51246                               |             | 0.157602          | 0.192611 | 0.177309 | 0.102583 | 0.11614  | 0.064652 | 0.094458 | 0.173842 | 0.543356 | 0.752189 | 0.01523  | -0.88003 |          |
| Q725J4_sSSSNASNGGGDGKEERPEGSPTLFK_S4_S5_S5_1 | Q725J4 | RAI1     | 10743  | retinoic acid induced 1                                      | 51247.51248.51249.30.61;30.61;30.61 |             | 0.212601          | 0.191597 | 0.248204 | 0.144137 | 0.104906 | 0.105634 | 0.122512 | 0.220521 | 0.717183 | 0.020027 | -0.89937 |          |          |
| Q725L9_dTLALHQHGSPPFEK_S12_1                 | Q725L9 | IFB2BP2  | 359948 | interferon regulatory factor 2 binding protein 2             | 5318                                |             | 0.440372          | 0.436354 | 0.274018 | 0.065785 | 0.064544 | 0.070394 | 0.066908 | 0.383581 | 0.174429 | 0.002108 | 0.028549 | -2.51928 |          |
| Q725L9_IIEPPELLRSPNPR_S11_1                  | Q725L9 | IFB2BP2  | 359948 | interferon regulatory factor 2 binding protein 2             | 5318                                |             | 0.158397          | 0.204613 | 0.178039 | 0.098471 | 0.118154 | 0.139097 | 0.118574 | 0.180437 | 0.657477 | 0.864141 | 0.025889 | -0.60499 |          |
| Q725L9_rNSNPPSPSMNQSR_S3_1                   | Q725L9 | IFB2BP2  | 359948 | interferon regulatory factor 2 binding protein 2             | 5455                                |             | 0.17369           | 0.217001 | 0.192247 | 0.083055 | 0.113936 | 0.107608 | 0.101533 | 0.196413 | 0.522523 | 0.720859 | 0.001059 | -0.93643 |          |
| Q725L9_rNSNPPSPSMNQSR_S5_S2_1                | Q725L9 | IFB2BP2  | 359948 | interferon regulatory factor 2 binding protein 2             | 5455.5457                           | 99.99;92.69 | 0.181178          | 0.175487 | 0.17125  | 0.122054 | 0.115282 | 0.111753 | 0.116363 | 0.175971 | 0.661261 | 0.950503 | 0.004192 | -0.59671 |          |
| Q725L9_rPVSAAVEAHEQR_S4_1                    | Q725L9 | IFB2BP2  | 359948 | interferon regulatory factor 2 binding protein 2             | 5240                                |             | 0.189939          | 0.226368 | 0.199381 | 0.105554 | 0.11727  | 0.117541 | 0.113455 | 0.203898 | 0.55372  | 0.223075 | 0.015009 | -0.85277 |          |
| Q725L9_tTPEAAQGGQSPMAALIAVNDAGGSHASK_T1_T2   | Q725L9 | IFB2BP2  | 359948 | interferon regulatory factor 2 binding protein 2             | 7412.7413                           | 50;50       | 0.158397          | 0.224041 | 0.246565 | 0.099987 | 0.145006 | 0.124284 | 0.12311  | 0.23586  | 0.552192 | 0.900603 | 0.004382 | -0.9381  |          |
| Q725L9_tTPEAAQGGQSPMAALIAVNDAGGSHASK_T2_1    | Q725L9 | IFB2BP2  | 359948 | interferon regulatory factor 2 binding protein 2             | 7413                                |             | 0.176379          | 0.188931 | 0.275887 | 0.092756 | 0.098878 | 0.080282 | 0.090639 | 0.213733 | 0.424076 | 0.059352 | 0.117911 | -1.2376  |          |
| Q726E9_gYAAAGQPRPSANRENFPER_S11_1            | Q726E9 | RBBP6    | 5930   | RB binding protein 6, ubiquitin ligase                       | 5363                                |             | 0.191005          | 0.149211 | 0.176774 | 0.119911 | 0.130262 | 0.087021 | 0.112398 | 0.17263  | 0.65109  | 0.944062 | 0.283733 | -0.61907 |          |
| Q726E9_nLQPLMRSPISR_S11_1                    | Q726E9 | RBBP6    | 5930   | RB binding protein 6, ubiquitin ligase                       | 5363                                |             | 0.17372           | 0.180297 | 0.143728 | 0.078955 | 0.118119 | 0.10651  | 0.101194 | 0.165915 | 0.609916 | 0.968602 | 0.016104 | -0.71332 |          |
| Q726E9_nLQPLMRSPISR_S8_1                     | Q726E9 | RBBP6    | 5930   | RB binding protein 6, ubiquitin ligase                       | 5367                                |             | 0.170718          | 0.170611 | 0.135946 | 0.060332 | 0.126361 | 0.094617 | 0.09377  | 0.159092 | 0.589406 | 0.538499 | 0.042604 | -0.76267 |          |
| Q726I6_nGSSLSDAVALAR_S6_1                    | Q726I6 | ARHGAP30 | 257106 | Rho GTPase activating protein 30                             | 5936                                |             | 0.195747          | 0.14797  | 0.168538 | 0.092769 | 0.124927 | 0.117455 | 0.111717 | 0.176752 | 0.654266 | 0.660562 | 0.020385 | -0.61205 |          |
| Q726P3_TPGVTFK_T1_1                          | Q726P3 | RAB44    | 401258 | RAB44, member B Ras oncogene family                          | 5494                                |             | 0.141412          | 0.204201 | 0.145339 | 0.087603 | 0.091404 | 0.047062 | 0.073536 | 0.16035  | 0.460472 | 0.656142 | 0.2358   | -1.11882 |          |
| Q86T10_vhsVSTETPHER_S3_1                     | Q86T10 | TB1D1    | 23216  | TB1 domain family member 1                                   | 5627                                |             | 0.149885          | 0.188298 | 0.159472 | 0.068331 | 0.117048 | 0.098247 | 0.094542 | 0.165885 | 0.659926 | 0.976975 | 0.017626 | -1.82007 |          |
| Q86U42_qMNMSPPGNAGVIMSEIK_S5_1               | Q86U42 | PABPN1   | 8106   | Poly(A) binding protein nuclear 1                            | 5150                                |             | 0.106009          | 0.188298 | 0.159472 | 0.068331 | 0.117048 | 0.098247 | 0.094542 | 0.165885 | 0.659926 | 0.976975 | 0.017626 | -1.82007 |          |
| Q86UDD_rHIASGVDGLTK_T3_1                     | Q86UDD | SAPCD2   | 89958  | Suppressor of lymphoma domain containing 2                   | 7129                                |             | 0.186778          | 0.217076 | 0.156245 | 0.09915  | 0.126009 | 0.108685 | 0.111281 | 0.198561 | 0.560439 | 0.241519 | 0.018178 | -0.83537 |          |
| Q86UJ0_bCell CLL/Lymphoma 9-like             | Q86UJ0 | BCNL9    | 283149 | b-cell CLL/Lymphoma 9-like                                   | 51478.51480                         | 47.66;47.66 | 0.318339          | 0.259018 | 0.260033 | 0.145875 | 0.127319 | 0.155282 | 0.179492 | 0.27913  | 0.643041 | 0.626205 | 0.046698 | -0.63702 |          |
| Q86UW9_vrHSMNLPAYVPQPHPR_S4_T6_1             | Q86UW9 | DTX2     | 113878 | deltex E3 ubiquitin ligase 2                                 | 5217.7219                           | 46.62;46.62 | 0.150169          | 0.198124 | 0.154219 | 0.085158 | 0.110476 | 0.122947 | 0.106194 | 0.167504 | 0.633978 | 0.687833 | 0.031847 | -0.65749 |          |
| Q86UW9_vrHSMNLPAYVPQPHPR_Y1_S4_1             | Q86UW9 | DTX2     | 113878 | deltex E3 ubiquitin ligase 2                                 | 5214.5217                           | 46.62;46.62 | 0.165423          | 0.181499 | 0.166234 | 0.099055 | 0.139935 | 0.112601 | 0.117197 | 0.170782 | 0.686237 | 0.334046 | 0.015251 | -0.54322 |          |
| Q86V48_aSbHmVgTDSGTQETK_S7_1                 | Q86V48 | LUZP1    | 7798   | leucine zipper protein 1                                     | 5440                                |             | 0.218401          | 0.307152 | 0.210305 | 0.04735  |          |          |          |          |          |          |          |          |          |

|                                                    |        |          |        |                                                              |                |                   |                    |          |          |          |          |          |          |          |          |          |          |           |          |
|----------------------------------------------------|--------|----------|--------|--------------------------------------------------------------|----------------|-------------------|--------------------|----------|----------|----------|----------|----------|----------|----------|----------|----------|----------|-----------|----------|
| Q8N122_svsYGNIR_S4_1                               | Q8N122 | RPTOR    | 57521  | regulatory associated protein of MTOR complex 1              | 5722           | 95.4              | PRLRSVSYGNIRAV     | 0.23654  | 0.231554 | 0.251152 | 0.094981 | 0.125636 | 0.099659 | 0.106758 | 0.239748 | 0.445294 | 0.551113 | 0.000288  | -1.16717 |
| Q8N183_gHASP4YFGEKEPSVA5STGK_Y7_1                  | Q8N183 | NDUFAF2  | 91942  | NADH:ubiquinone oxidoreductase complex assembly factor Y137  | 9137           | 97.59             | KGHASAPYFGEKEPS    | 0.191016 | 0.240363 | 0.211056 | 0.147878 | 0.162499 | 0.139205 | 0.149861 | 0.214145 | 0.69981  | 0.367367 | 0.015432  | -0.51496 |
| Q8N1G0_hGLQLGAGSPPGR_S9_1                          | Q8N1G0 | ZNF687   | 57592  | zinc finger protein 687                                      | 5157           | 97.59             | GLQLGAGSPPGR       | 0.167032 | 0.156583 | 0.21302  | 0.100188 | 0.124331 | 0.087797 | 0.104106 | 0.178979 | 0.58199  | 0.55573  | 0.021431  | -0.78093 |
| Q8N1G0_tQsSLVEAFNK_S3_1                            | Q8N1G0 | ZNF687   | 57592  | zinc finger protein 687                                      | 5157           | 99.18             | TVLTSRRQSSSLVEAF   | 0.242127 | 0.276941 | 0.185281 | 0.048985 | 0.099276 | 0.097177 | 0.081813 | 0.202478 | 0.348461 | 0.548666 | 0.008172  | -1.52093 |
| Q8N3D4_rPvNPFGEVSPVPPR_S3_1                        | Q8N3D4 | EHPB1L1  | 254102 | EH domain binding protein 1 like 1                           | 5495           | 100               | GVIRLRPFSVNFGEVSP  | 0.207117 | 0.196203 | 0.202462 | 0.115031 | 0.159992 | 0.096226 | 0.123749 | 0.213942 | 0.612841 | 0.504354 | 0.015146  | -0.70642 |
| Q8N3F8_sPVPSSGGSPQLQV_S8_S9_S10_1                  | Q8N3F8 | MICAL1L  | 85377  | MICAL like 1                                                 | 5619.5620.5621 | 33.33;33.33;33.33 | SVIPSSSSSSPQLQV    | 0.156878 | 0.224377 | 0.211315 | 0.081881 | 0.116552 | 0.087823 | 0.095418 | 0.197524 | 0.483073 | 0.423004 | 0.011815  | -1.04969 |
| Q8N3U4_nLLQGDSDDDTMSVIGSISGRGTVR_S23_T24_1         | Q8N3U4 | STAG2    | 10735  | stromal antigen 2                                            | 5068.11069     | 47.27;43.27       | SGVSSGSSVTVSRKKS   | 0.225638 | 0.220051 | 0.176429 | 0.071188 | 0.097666 | 0.065365 | 0.078073 | 0.203773 | 0.376486 | 0.579821 | 0.021087  | -1.40933 |
| Q8N3V7_dRASPAAEAVFPEWASCTK_S3_1                    | Q8N3V7 | SYNPO    | 11346  | synaptodin                                                   | 5685           | 100               | PAPDRASPAAEAVF     | 0.199836 | 0.235885 | 0.151365 | 0.0969   | 0.128993 | 0.09675  | 0.107548 | 0.195696 | 0.549567 | 0.321812 | 0.003003  | -0.86363 |
| Q8N488_sDLKDPSEANSIQANATK_S14_1                    | Q8N488 | RYBP     | 23429  | RING1 and Y11 binding protein                                | 5127           | 90.91             | DLKDPSEANSIQANAT   | 0.217461 | 0.220078 | 0.203479 | 0.110954 | 0.158973 | 0.095854 | 0.121927 | 0.213673 | 0.570625 | 0.368166 | 0.096934  | -0.80939 |
| Q8N4C8_gTKPFPAPPQPPGNASNDPLRR_S19_S20_1            | Q8N4C8 | MINK1    | 50488  | misshapen like kinase 1                                      | 5732.5733      | 50;50             | FPFPNPNASNDPLRR    | 0.1707   | 0.240293 | 0.162859 | 0.090668 | 0.138748 | 0.081849 | 0.103755 | 0.191151 | 0.54279  | 0.678873 | 0.045019  | -0.88153 |
| Q8N4C8_gTKPFPAPPQPPGNASNDPLRR_S20_1                | Q8N4C8 | MINK1    | 50488  | misshapen like kinase 1                                      | 5733           |                   | PGFPNPNASNDPLRR    | 0.220628 | 0.262399 | 0.204885 | 0.110185 | 0.167814 | 0.101405 | 0.126468 | 0.229364 | 0.551385 | 0.820146 | 0.019194  | -0.85887 |
| Q8N4C8_nLLHADNSGYTNLPDVPQSHSPEIKNSK_S20_S22_1      | Q8N4C8 | MINK1    | 50488  | misshapen like kinase 1                                      | 5916.5918      | 44.29;44.29       | LPDVPQSHSPEIKNSK   | 0.210339 | 0.241071 | 0.244447 | 0.207591 | 0.150234 | 0.154708 | 0.170844 | 0.231953 | 0.736548 | 0.515261 | 0.045995  | -0.44115 |
| Q8N4C8_sNsAWQIYLQR_S3_1                            | Q8N4C8 | MINK1    | 50488  | misshapen like kinase 1                                      | 5706           |                   | SNSAWQIYLQR        | 0.234239 | 0.297155 | 0.145848 | 0.057831 | 0.085881 | 0.075933 | 0.073215 | 0.225747 | 0.342324 | 0.067641 | 0.026867  | -1.62449 |
| Q8N567_gLEANRLSKNDAPQAK_S8_1                       | Q8N567 | ZCHC9    | 84240  | zinc finger CCHC-type containing 9                           | 548            |                   | QLEANRLSKNDAPQAK   | 0.240352 | 0.255892 | 0.233609 | 0.064139 | 0.072929 | 0.069012 | 0.068693 | 0.243284 | 0.282358 | 0.25863  | 1.6E-05   | -1.8244  |
| Q8N568_qNsTLLDGVSVMNTALDK_S9_1                     | Q8N568 | DCLK2    | 166614 | doublecortin like kinase 2                                   | 5688           |                   | NsTLLDGVSVMNTALDK  | 0.151813 | 0.175024 | 0.175076 | 0.046978 | 0.121277 | 0.10083  | 0.089695 | 0.167305 | 0.536118 | 0.217758 | 0.029759  | -0.89938 |
| Q8N5F7_nGLTHQLGGLSGQR_S11_1                        | Q8N5F7 | NKAP     | 79576  | NFKB activating protein                                      | 564            |                   | nGLTHQLGGLSGQR     | 0.148224 | 0.140744 | 0.18713  | 0.075971 | 0.089508 | 0.084238 | 0.083239 | 0.158699 | 0.524507 | 0.139657 | 0.007172  | -0.93097 |
| Q8N5G2_ksLTLTPEIYR_S3_1                            | Q8N5G2 | MACO1    | 524    |                                                              | 564            |                   | ksLTLTPEIYR        | 0.15908  | 0.21612  | 0.19005  | 0.048196 | 0.089052 | 0.105109 | 0.080786 | 0.188417 | 0.42876  | 0.972772 | 0.101039  | -1.22176 |
| Q8N5Y2_ssPILPPLTKSGSAVFAFGEGR_S3_S14_2             | Q8N5Y2 | MSL3     | 10943  | male-specific lethal 3 homolog                               | 5400.5411      | 72.54;99.72       | ssPILPPLTKSGSAVFA  | 0.169097 | 0.200641 | 0.21926  | 0.129791 | 0.154777 | 0.113991 | 0.132853 | 0.196333 | 0.676673 | 0.793522 | 0.282102  | -0.56347 |
| Q8N684_dSSADGASDRATSEINLVPSSAR_S5_1                | Q8N684 | CPSF7    | 79869  | cleavage and polyadenylation specific factor 7               | 5197           |                   | dSSADGASDRATSEINL  | 0.210421 | 0.217327 | 0.192574 | 0.143512 | 0.152123 | 0.153254 | 0.14963  | 0.206774 | 0.723641 | 0.296428 | 0.020203  | -0.46665 |
| Q8N6H7_alsSDMFFGR_S3_1                             | Q8N6H7 | ARFGAP2  | 84364  | ADP ribosylation factor GTPase activating protein 2          | 5432           |                   | alsSDMFFGR         | 0.176019 | 0.222462 | 0.185631 | 0.06204  | 0.105873 | 0.093881 | 0.087265 | 0.194704 | 0.448191 | 0.92121  | 0.005073  | -1.15782 |
| Q8N6H7_sRSRQLDFDQVDTFASGPK_S1_S2_1                 | Q8N6H7 | ARFGAP2  | 84364  | ADP ribosylation factor GTPase activating protein 2          | 5337.5338      | 47.69;47.69       | sRSRQLDFDQVDTFAS   | 0.244757 | 0.223652 | 0.229026 | 0.05056  | 0.082003 | 0.061348 | 0.064637 | 0.234729 | 0.730464 | 0.600517 | 0.000115  | -1.84667 |
| Q8N6H7_sRSRQLDFDQVDTFASGPK_S1_S2_S4_1              | Q8N6H7 | ARFGAP2  | 84364  | ADP ribosylation factor GTPase activating protein 2          | 5337.5338.5340 | 33.33;33.33;33.33 | sRSRQLDFDQVDTFAS   | 0.199808 | 0.227069 | 0.243481 | 0.066988 | 0.077716 | 0.085744 | 0.078616 | 0.221119 | 0.347395 | 0.239448 | 0.008814  | -1.52535 |
| Q8N6H7_sRSRQLDFDQVDTFASGPK_S2_1                    | Q8N6H7 | ARFGAP2  | 84364  | ADP ribosylation factor GTPase activating protein 2          | 5338           |                   | sRSRQLDFDQVDTFAS   | 0.239664 | 0.232005 | 0.247168 | 0.105533 | 0.123434 | 0.103671 | 0.110879 | 0.239612 | 0.462745 | 0.651094 | 0.739E-05 | -1.11717 |
| Q8N6H7_sRSRQLDFDQVDTFASGPK_S4_1                    | Q8N6H7 | ARFGAP2  | 84364  | ADP ribosylation factor GTPase activating protein 2          | 5340           |                   | sRSRQLDFDQVDTFAS   | 0.22452  | 0.258947 | 0.260112 | 0.072944 | 0.105317 | 0.097363 | 0.091874 | 0.247859 | 0.370671 | 0.820755 | 0.000509  | -1.43179 |
| Q8N6H7_sSVSHVLESMQIQEETPVSAK_S6_1                  | Q8N6H7 | ARFGAP2  | 84364  | ADP ribosylation factor GTPase activating protein 2          | 5319           |                   | sSVSHVLESMQIQEETP  | 0.287111 | 0.358478 | 0.343046 | 0.106128 | 0.089976 | 0.068428 | 0.090334 | 0.329545 | 0.274117 | 0.514092 | 0.006087  | -1.86713 |
| Q8N6H7_sSVSHVLESMQIQEETPVSAK_S9_1                  | Q8N6H7 | ARFGAP2  | 84364  | ADP ribosylation factor GTPase activating protein 2          | 5322           |                   | sSVSHVLESMQIQEETP  | 0.263391 | 0.308023 | 0.252465 | 0.044491 | 0.068203 | 0.046556 | 0.053083 | 0.274626 | 0.193299 | 0.332128 | 0.000285  | -2.37114 |
| Q8N655_sVLPDNGSMPVLPDKR_S10_1                      | Q8N655 | ARL6IP6  | 151188 | ADP ribosylation factor like GTPase 6 interacting protein 80 | 5628           |                   | sVLPDNGSMPVLPDKR   | 0.176268 | 0.257467 | 0.212457 | 0.105896 | 0.160406 | 0.103758 | 0.123354 | 0.215397 | 0.576279 | 0.76751  | 0.007603  | -0.8042  |
| Q8N9T8_qLPALDDSLMGPESSPAQEEAAPVSPHKAPOAK_S1_Q8N9T8 | Q8N9T8 | KRI1     | 65095  | KRI1 homolog                                                 | 5628           |                   | qLPALDDSLMGPESSPAQ | 0.183532 | 0.188299 | 0.208796 | 0.147832 | 0.127246 | 0.148587 | 0.141222 | 0.193542 | 0.72967  | 0.897348 | 0.007423  | -0.45468 |
| Q8NAV1_sRYDLNPKR_S1_Y2_1                           | Q8NAV1 | PRPF38A  | 84950  | pre-mRNA processing factor 38A                               | 5216.Y217      | 50;50             | sRYDLNPKR          | 0.185394 | 0.201788 | 0.171738 | 0.113724 | 0.118965 | 0.111061 | 0.114583 | 0.186547 | 0.615025 | 0.133338 | 0.001399  | -0.70128 |
| Q8NC51_hsSRRSSFSHYSGK_S10_1                        | Q8NC51 | SERP11   | 26135  | SERPINE1 mRNA binding protein 1                              | 5205           |                   | hsSRRSSFSHYSGK     | 0.202678 | 0.357169 | 0.305656 | 0.143014 | 0.10729  | 0.056407 | 0.102237 | 0.303501 | 0.33686  | 0.397603 | 0.013323  | -1.56978 |
| Q8NCFS_kKFTEFLDNPSLPPSPR_S14_1                     | Q8NCFS | NFATC2IP | 84901  | nuclear factor of activated T-cells 2 interacting protein    | 5204           |                   | kKFTEFLDNPSLPPSPR  | 0.226862 | 0.214049 | 0.185688 | 0.087101 | 0.092282 | 0.08343  | 0.087604 | 0.19586  | 0.438337 | 0.029657 | 0.0344    | -1.18989 |
| Q8NCFS_kKFTEFLDNPSLPPSPR_S17_1                     | Q8NCFS | NFATC2IP | 84901  | nuclear factor of activated T-cells 2 interacting protein    | 5204           |                   | kKFTEFLDNPSLPPSPR  | 0.197149 | 0.190589 | 0.155266 | 0.136526 | 0.145891 | 0.126365 | 0.136261 | 0.181002 | 0.752816 | 0.31638  | 0.034311  | -0.40963 |
| Q8NCFS_kTFEFLDNPSLPPSPR_S16_1                      | Q8NCFS | NFATC2IP | 84901  | nuclear factor of activated T-cells 2 interacting protein    | 5204           |                   | kTFEFLDNPSLPPSPR   | 0.203139 | 0.226494 | 0.221685 | 0.087103 | 0.102069 | 0.073108 | 0.084427 | 0.217166 | 0.388765 | 0.768579 | 0.00031   | -1.36303 |
| Q8NCN4_ksGVDQYTLR_S3_Y7_1                          | Q8NCN4 | RNF169   | 254225 | rifB binding protein 169                                     | 5693.Y697      | 50;50             | ksGVDQYTLR         | 0.169911 | 0.259812 | 0.242484 | 0.030565 | 0.091298 | 0.065725 | 0.062529 | 0.220609 | 0.279063 | 0.580268 | 0.007803  | -1.84134 |
| Q8ND30_tQsGNFYDTLGMARFSR_S3_1                      | Q8ND30 | PFPIBP2  | 8495   | PFPIA finger protein 2                                       | 5512           |                   | tQsGNFYDTLGMARFSR  | 0.221284 | 0.209629 | 0.195741 | 0.044982 | 0.120007 | 0.088788 | 0.084592 | 0.224865 | 0.404971 | 0.206485 | 0.005657  | -1.30411 |
| Q8ND56_sqPLDPLRSPtmEQAQVATASAHLPAAVAGR_S11_Q8ND56  | Q8ND56 | LSM14A   | 26065  | LSM14A, mRNA processing body assembly factor                 | 5192           |                   | sqPLDPLRSPtmEQAQVA | 0.186623 | 0.253422 | 0.266297 | 0.124635 | 0.180015 | 0.12921  | 0.14462  | 0.23402  | 0.617982 | 0.63212  | 0.047245  | -0.69436 |
| Q8ND82_sEPHSGPIEFIR_S5_1                           | Q8ND82 | ZNF280C  | 55609  | zinc finger protein 280C                                     | 5186           |                   | sEPHSGPIEFIR       | 0.212184 | 0.210851 | 0.225063 | 0.09536  | 0.121015 | 0.117616 | 0.11133  | 0.20152  | 0.5365   | 0.679024 | 0.022238  | -0.89835 |
| Q8ND82_ssQSSVTEVNAKSPDFTK_S2_1                     | Q8ND82 | ZNF280C  | 55609  | zinc finger protein 280C                                     | 5186           |                   | ssQSSVTEVNAKSPDFTK | 0.204301 | 0.177443 | 0.232802 | 0.075849 | 0.110619 | 0.109486 | 0.098651 | 0.204899 | 0.48158  | 0.674848 | 0.00566   | -1.05415 |
| Q8ND11_sASSFFK_S1_1                                | Q8ND11 | C1orf131 | 128061 | chromosome 1 open reading frame 131                          | 5815           |                   | sASSFFK            | 0.29472  | 0.297398 | 0.24764  | 0.075495 | 0.103423 | 0.083718 | 0.087545 | 0.279919 | 0.312751 | 0.641444 | 0.004429  | -1.67691 |
| Q8ND11_sQSGRTSGSDPGDPCNSDSTQAOVLGK_T8_S9_Q8ND11    | Q8ND11 | EHPB1    | 23301  | EH domain binding protein 1                                  | 7663.5664      | 47.14;47.14       | sQSGRTSGSDPGDPCNS  | 0.174221 | 0.174868 | 0.197316 | 0.134101 | 0.124262 | 0.151609 | 0.136657 | 0.181402 | 0.753234 | 0.99967  | 0.016738  | -0.40862 |
| Q8NDX1_qADPPVWVGVELTHLGSPPAQR_S19_1                | Q8NDX1 | PSD4     | 23550  | pleckstrin and Sec7 domain containing 4                      | 5120           |                   | qADPPVWVGVELTHLGS  | 0.212044 | 0.239652 | 0.26646  | 0.160554 | 0.146146 | 0.160977 | 0.159652 | 0.240119 | 0.64923  | 0.189325 | 0.006022  | -0.6232  |
| Q8NDX1_qANTASQSPVNHLPSPG_S17_1                     | Q8NDX1 | PSD4     | 23550  | pleckstrin and Sec7 domain containing 4                      | 5143           |                   | qANTASQSPVNHLPSPG  | 0.176813 | 0.204732 | 0.183255 | 0.124059 | 0.153217 | 0.120334 | 0.132537 | 0.188267 | 0.703983 | 0.794571 | 0.011724  | -0.50639 |
| Q8NEF9_sLDFPQNFPIK_S1_1                            | Q8NEF9 | SRRFBP1  | 153443 | serum response factor binding protein 1                      | 5367           |                   | sLDFPQNFPIK        | 0.172464 | 0.175424 | 0.198152 | 0.084334 | 0.127437 | 0.132479 | 0.11475  | 0.18027  | 0.6304   | 0.44119  | 0.017425  | -0.66566 |
| Q8NEF9_rSLDPPQNFPIK_S3_1                           | Q8NEF9 | SRRFBP1  | 153443 | serum response factor binding protein 1                      | 5367           |                   | rSLDPPQNFPIK       | 0.229862 | 0.174713 | 0.273578 | 0.092275 | 0.102643 | 0.149669 | 0.114863 | 0.226051 | 0.5081   |          |           |          |

|                                                    |        |          |                                                                           |                   |                               |       |                     |          |          |          |          |          |          |          |          |          |          |          |          |
|----------------------------------------------------|--------|----------|---------------------------------------------------------------------------|-------------------|-------------------------------|-------|---------------------|----------|----------|----------|----------|----------|----------|----------|----------|----------|----------|----------|----------|
| Q8WUA4_aHFNAmFQPSpPTR_S10_1                        | Q8WUA4 | GTF3C2   | 2976 general transcription factor IIIC subunit 2                          | 5892              |                               | 89.63 | FNAMFQPSSTPRRG      | 0.15084  | 0.186766 | 0.190369 | 0.065345 | 0.108853 | 0.098611 | 0.090936 | 0.175992 | 0.516707 | 0.960076 | 0.009517 | -0.95258 |
| Q8WUA4_aHFNAmFQPSpPTR_S10_S11_1                    | Q8WUA4 | GTF3C2   | 2976 general transcription factor IIIC subunit 2                          | 5892.5893         | 49.96;49.96                   |       | FNAMFQPSSTPRRG_NAI  | 0.203478 | 0.183979 | 0.21676  | 0.097029 | 0.132196 | 0.132163 | 0.120462 | 0.201405 | 0.598109 | 0.795267 | 0.00584  | -0.74152 |
| Q8WUM9_nNSYtsYTMAlcMPLDSFR_S3_Y4_T5_1              | Q8WUM9 | SLC20A1  | 6574 solute carrier family 20 member 1                                    | 5417.Y418.T419    | 32.02;32.02;32.02             |       | KPLRRNINSYTSYMA_PLI | 0.238827 | 0.186588 | 0.223184 | 0.177112 | 0.141564 | 0.157388 | 0.158688 | 0.2162   | 0.739897 | 0.612388 | 0.036402 | -0.44617 |
| Q8WUM9_nNSYtsYTMAlcMPLDSFR_S3_Y4_T5_S6_1           | Q8WUM9 | SLC20A1  | 6574 solute carrier family 20 member 1                                    | 5417.Y418.T419.S4 | 24.48;24.48;24.48;24.48       |       | RNLRRNINSYTSYMA_PLI | 0.319408 | 0.158953 | 0.173893 | 0.130729 | 0.140757 | 0.124445 | 0.131977 | 0.174945 | 0.754392 | 0.396591 | 0.015758 | -0.40661 |
| Q8WUM9_nNSYtsYTMAlcMPLDSFR_Y7_T8_1                 | Q8WUM9 | SLC20A1  | 6574 solute carrier family 20 member 1                                    | Y421.T422         | 45.03;45.03                   |       | KPNYSYSYTMAlcM_PLI  | 0.212102 | 0.20905  | 0.260452 | 0.141238 | 0.142872 | 0.173608 | 0.152573 | 0.266364 | 0.578728 | 0.192048 | 0.031274 | -0.78904 |
| Q8WVK2_vdGSvNAVAINvQKR_S13_1                       | Q8WVK2 | SNRPNP27 | 11017 small nuclear ribonucleoprotein U74/U5.U6 subunit 27                | S132              |                               | 100   | NKAINVNSQKRKYRQ     | 0.163742 | 0.197872 | 0.149436 | 0.090579 | 0.078343 | 0.08299  | 0.083971 | 0.16702  | 0.502757 | 0.183528 | 0.002129 | -0.99207 |
| Q8WVW1_rksYTDLoK_S3_Y4_1                           | Q8WVW1 | LMO7     | 4008 LIM domain 7                                                         | S751.Y752         | 49.9;49.9                     |       | NYAYINSDYTDLoK_NKI  | 0.103705 | 0.181783 | 0.188319 | 0.120438 | 0.107576 | 0.158765 | 0.133003 | 0.182675 | 0.714678 | 0.553348 | 0.026827 | -0.48463 |
| Q8WVW1_rkSFQEGSSDvVPLDVPtPISAR_S3_1                | Q8WVW1 | LMO7     | 4008 LIM domain 7                                                         | S1197             |                               | 97.74 | WLNKRQRSPFEFGQ      | 0.276331 | 0.272125 | 0.246906 | 0.101941 | 0.121658 | 0.116054 | 0.113218 | 0.265121 | 0.427041 | 0.579189 | 0.000154 | -1.22755 |
| Q8WVW1_rksvNKEPVSJGImR_S1_1                        | Q8WVW1 | LMO7     | 4008 LIM domain 7                                                         | S1493             |                               | 90.87 | WLRQRSAASKEPVs      | 0.184591 | 0.192342 | 0.189046 | 0.096297 | 0.127725 | 0.129466 | 0.118729 | 0.18866  | 0.62456  | 0.083223 | 0.000252 | -0.67909 |
| Q8WVW1_rkSTYLoK_S1_1                               | Q8WVW1 | LMO7     | 4008 LIM domain 7                                                         | S751              |                               | 99.42 | WKKDRQRSPFEFGQ      | 0.208724 | 0.181409 | 0.183055 | 0.099464 | 0.117437 | 0.162287 | 0.126396 | 0.191063 | 0.661543 | 0.366175 | 0.035227 | -0.59609 |
| Q8WVW7_rkPQPSvFVEGvVNSR_S5_1                       | Q8WVW7 | ATXN2L   | 11273 ataxin 2 like                                                       | S111              |                               | 100   | TGKWRQPSPFEFGQ      | 0.232355 | 0.208881 | 0.229606 | 0.160601 | 0.164035 | 0.153575 | 0.153337 | 0.223614 | 0.665721 | 0.804098 | 0.003849 | -0.54431 |
| Q8WVW7_rkQPSsPENSLDFPPPR_S5_S6_1                   | Q8WVW7 | ATXN2L   | 11273 ataxin 2 like                                                       | S558.S559         | 49.89;49.89                   |       | QFKLQPSsPENSLD_FK   | 0.252396 | 0.223356 | 0.25421  | 0.084544 | 0.113366 | 0.112554 | 0.103488 | 0.243321 | 0.425315 | 0.946479 | 0.00053  | -1.23339 |
| Q8WVW7_rkQPSsPENSLDFPPPR_S6_1                      | Q8WVW7 | ATXN2L   | 11273 ataxin 2 like                                                       | S559              |                               | 85.22 | FKMLQPSsPENSLD      | 0.198084 | 0.202562 | 0.229408 | 0.08677  | 0.105578 | 0.112125 | 0.1015   | 0.210018 | 0.48329  | 0.753566 | 0.000937 | -1.04904 |
| Q8WVWQ_rkSRSISSEVHsPPNVGLR_S10_1                   | Q8WVWQ | PHP      | 55023 pleckstrin homology domain interacting protein                      | S679              |                               |       | RKGSISSTSEVHsPPN    | 0.183057 | 0.201353 | 0.231358 | 0.162502 | 0.158855 | 0.139877 | 0.153745 | 0.202526 | 0.749039 | 0.397607 | 0.03065  | -0.41689 |
| Q8WVWQ_rkRSPSTLTVTFsQNVckPVEETQRPTLQEK_S4          | Q8WVWQ | RASSF5   | 83593 Ras association domain family member 5                              | S182              |                               | 61.26 | GLSRDRPSSPESTLV     | 0.175686 | 0.209777 | 0.196976 | 0.146598 | 0.11796  | 0.118029 | 0.127529 | 0.194146 | 0.65687  | 0.958143 | 0.008425 | -0.60632 |
| Q8WVY3_qvVYGGkSTIRDR_T10_1                         | Q8WVY3 | PRPF31   | 26121 pre-mRNA processing factor 31                                       | S439.T440         | 49.98;49.98                   |       | SVVYGGkSTIRDRSS_VV  | 0.170291 | 0.150318 | 0.142466 | 0.117912 | 0.116586 | 0.103943 | 0.112814 | 0.154358 | 0.730856 | 0.448262 | 0.011528 | -0.45234 |
| Q8WXA9_eAQFSIAAIEPEsGKsNER_S14_1                   | Q8WXA9 | CASKIN2  | 140890 splicing regulatory glutamic acid and lysine rich protein          | S181              |                               | 90.63 | AAIEPEsGKsNERK      | 0.152644 | 0.193597 | 0.220088 | 0.130304 | 0.103776 | 0.102678 | 0.123576 | 0.188776 | 0.654617 | 0.456397 | 0.043254 | -0.61128 |
| Q8WXE0_gEQIQTQDVPRQLLEGK_S1_1                      | Q8WXE0 | CASKIN2  | 57513 CASK interacting protein 2                                          | S471              |                               | 100   | RPLNLRNRSRQFPQT     | 0.233409 | 0.221939 | 0.196885 | 0.128095 | 0.105572 | 0.105267 | 0.129708 | 0.217411 | 0.519653 | 0.658915 | 0.001369 | -0.94438 |
| Q8WXE0_sHSLSRPGPEGDAEGEAEGPVGSTLGSYATLTR_S3        | Q8WXE0 | CASKIN2  | 57513 CASK interacting protein 2                                          | S800              |                               | 71.25 | RPLNLRNRSRQFPQT     | 0.198721 | 0.248724 | 0.187928 | 0.128823 | 0.156057 | 0.104238 | 0.112976 | 0.216107 | 0.612955 | 0.701275 | 0.020045 | -0.70615 |
| Q8WXE0_sHSLSRPGPEGDAEGEAEGPVGSTLGSYATLTR_S3_Q8WXE0 | Q8WXE0 | CASKIN2  | 57513 CASK interacting protein 2                                          | S800.S802         | 45.23;45.23                   |       | RPLNLRNRSRQFPQT_KRI | 0.248714 | 0.257659 | 0.278829 | 0.18568  | 0.200551 | 0.131031 | 0.12421  | 0.261734 | 0.658763 | 0.30291  | 0.017651 | -0.60217 |
| Q8WXE0_sHSLSRPGPEGDAEGEAEGPVGSTLGSYATLTR_T1        | Q8WXE0 | CASKIN2  | 57513 CASK interacting protein 2                                          | T807              |                               | 67.06 | SLSRPGPEGDAEGE      | 0.177495 | 0.218475 | 0.204676 | 0.116327 | 0.149904 | 0.108208 | 0.124813 | 0.200215 | 0.623394 | 0.941667 | 0.012668 | -0.68178 |
| Q8WXF1_gAINMGDAFsPAPAGNQPMPMMGmNMMNR_S:Q8WXF1      | Q8WXF1 | PSCP1    | 55269 paraspeckle component 1                                             | S409              |                               |       | INMGDAFsPAPAGN      | 0.153889 | 0.164974 | 0.194126 | 0.11615  | 0.141867 | 0.10713  | 0.121716 | 0.170997 | 0.711802 | 0.858569 | 0.031628 | -0.49045 |
| Q8WXG6_gtLSDSIEITNSATStIFGK_T2_1                   | Q8WXG6 | MADD     | 8567 MAP kinase activating death domain                                   | T1237             |                               | 90.48 | HLMSDIEITNSAT       | 0.209017 | 0.231676 | 0.200092 | 0.131647 | 0.167885 | 0.157714 | 0.152415 | 0.203957 | 0.713569 | 0.862893 | 0.0129   | -0.48868 |
| Q8WXG6_kRSPtSVNTPVGK_S7_1                          | Q8WXG6 | MADD     | 8567 MAP kinase activating death domain                                   | T1061.S1063       | 45.42;45.42                   |       | DRKRSPtSVNTPVGK_KRI | 0.212153 | 0.178341 | 0.240646 | 0.172011 | 0.128408 | 0.118261 | 0.13956  | 0.21038  | 0.663731 | 0.912039 | 0.044091 | -0.59211 |
| Q8WZ73_rAsLSDTLEDIEGLTVR_S3_1                      | Q8WZ73 | RFL      | 117584 ring finger and FYVE like domain containing E3 ubiquitin S240      | S240              |                               | 86.85 | FVPRGRASLDDTL       | 0.182821 | 0.235674 | 0.281498 | 0.081938 | 0.151477 | 0.093781 | 0.109605 | 0.233331 | 0.467428 | 0.724197 | 0.025323 | -1.09719 |
| Q8WZ73_rAsLSDTLEDIEGLTVR_S3_S5_1                   | Q8WZ73 | RFL      | 117584 ring finger and FYVE like domain containing E3 ubiquitin S240.S242 | S240.S242         | 50.50                         |       | FVPRGRASLDDTL_PGI   | 0.190723 | 0.238734 | 0.296371 | 0.107496 | 0.15306  | 0.104092 | 0.125449 | 0.241943 | 0.502329 | 0.421684 | 0.024852 | -0.99312 |
| Q8Z499_aAGGSyKSHVDIAPVTLQALAEK_Y7_1                | Q8Z499 | DDX1     | 1653 DEAD-box helicase 1                                                  | Y701              |                               | 78.23 | RAAGGSyKSHVDI       | 0.209976 | 0.195023 | 0.235702 | 0.128879 | 0.118571 | 0.182984 | 0.143748 | 0.21324  | 0.627288 | 0.165202 | 0.040018 | -0.57165 |
| Q92538_rPQHPPEIseLcACDFEKPESR_S24_1                | Q92538 | GBF1     | 8729 golgi brefeldin A resistant guanine nucleotide exchange              | S1773             |                               | 100   | CDPKEPESRAASSS      | 0.157142 | 0.144245 | 0.183644 | 0.099415 | 0.126979 | 0.124567 | 0.116987 | 0.161677 | 0.723583 | 0.73217  | 0.033265 | -0.46677 |
| Q92541_ITIQESvYTSHNK_S7_1                          | Q92541 | RTF1     | 23168 RTF1 homolog, Paf1/RNA polymerase II complex compo                  | S528              |                               | 100   | KLTIQESvYTSHNK      | 0.313689 | 0.246083 | 0.254239 | 0.306895 | 0.045454 | 0.043411 | 0.041912 | 0.271337 | 0.154495 | 0.028918 | 0.007809 | -0.26937 |
| Q92560_sASNkPLVLEARN_S6_1                          | Q92560 | BAP1     | 8314 BRCA1 associated protein 1                                           | S292              |                               | 97.38 | SKASNkPLVLEARN      | 0.201716 | 0.19092  | 0.227554 | 0.183785 | 0.133399 | 0.132365 | 0.14985  | 0.20673  | 0.724857 | 0.58172  | 0.047707 | -0.46423 |
| Q92576_rGSvAVTSHFEVGNTPCEFPsK_S3_1                 | Q92576 | PHF3     | 23469 PHF finger protein 3                                                | S1758             |                               | 98.96 | VHFRRGSvAVTSHF      | 0.214591 | 0.215017 | 0.221775 | 0.049485 | 0.064236 | 0.051253 | 0.054992 | 0.212167 | 0.253269 | 0.400473 | 0.631    | -0.19816 |
| Q92576_rGSvAVTSHFEVGNTPCEFPsK_T7_S8_1              | Q92576 | PHF3     | 23469 PHF finger protein 3                                                | T1762.S1763       | 46.97;46.97                   |       | RGSvAVTSHFEVGN      | 0.244575 | 0.243829 | 0.252562 | 0.097933 | 0.089509 | 0.093745 | 0.087542 | 0.246988 | 0.354439 | 0.601091 | 0.6236   | -1.49639 |
| Q92576_rPQFINk_S1_1                                | Q92576 | PHF3     | 23469 PHF finger protein 3                                                | S1162             |                               | 100   | LVRTANRSPQFINK      | 0.176699 | 0.140743 | 0.155672 | 0.107677 | 0.086947 | 0.064979 | 0.086534 | 0.157408 | 0.548374 | 0.842555 | 0.11     | -0.86677 |
| Q92597_rkASGSvVSLDGT_S5_S7_S8_T10_S11_S11_1        | Q92597 | NDRG1    | 10397 N-myc downstream regulated 1                                        | S303.S332.S333.T3 | 19.3;19.3;19.3;19.3;19.3;19.3 |       | LMKRTSvVSLDGT       | 0.17493  | 0.193141 | 0.144789 | 0.051008 | 0.080449 | 0.073302 | 0.067953 | 0.170953 | 0.397496 | 0.593445 | 0.003596 | -1.33099 |
| Q92608_rsvVFADEK_S2_S3_1                           | Q92608 | DOCK2    | 1794 dedicator of cytokinesis 2                                           | S1700.S1706       | 50.50                         |       | KLKRTSvVFADEK       | 0.150756 | 0.178271 | 0.133437 | 0.072931 | 0.124596 | 0.097535 | 0.098354 | 0.154155 | 0.638022 | 0.86714  | 0.048084 | -0.64832 |
| Q92608_rsvVFADEK_S3_1                              | Q92608 | DOCK2    | 1794 dedicator of cytokinesis 2                                           | S1706             |                               | 97.33 | KRKRKRSvVFADEK      | 0.237292 | 0.197196 | 0.216908 | 0.054077 | 0.095732 | 0.086571 | 0.078793 | 0.217132 | 0.362882 | 0.912374 | 0.017279 | -1.46243 |
| Q92609_sESMPVQLNK_S3_1                             | Q92609 | TBC1D5   | 9779 TBC1 domain family member 5                                          | S528              |                               | 94.52 | GLTKMKSvVQLNK       | 0.139658 | 0.16461  | 0.146266 | 0.073447 | 0.100389 | 0.100207 | 0.091347 | 0.150178 | 0.253269 | 0.820324 | 0.020241 | -0.71724 |
| Q92609_tS1DSESGTFSYRk_S2_1                         | Q92609 | TBC1D5   | 9779 TBC1 domain family member 5                                          | S43               |                               | 90.58 | NKNGRSTSS1DSE       | 0.190539 | 0.17218  | 0.15647  | 0.125288 | 0.111209 | 0.133539 | 0.123345 | 0.173063 | 0.712719 | 0.609612 | 0.013578 | -0.48859 |
| Q92614_sFRMQPEEGSGLDGTPk_S3_1                      | Q92614 | MYO18A   | 399687 myosin XVIII A                                                     | S728              |                               | 90.16 | GLTFRMQPEEGSG       | 0.167763 | 0.225394 | 0.163699 | 0.116681 | 0.118513 | 0.099517 | 0.103656 | 0.185619 | 0.574114 | 0.16662  | 0.019117 | -0.80059 |
| Q92615_hAIPsAERGLPESsFNfADR_S5_1                   | Q92615 | LARP4B   | 23185 LA ribonucleoprotein 4B                                             | S424              |                               | 100   | HLRHAIPsAERGLP      | 0.224844 | 0.212317 | 0.224106 | 0.10052  | 0.123923 | 0.097587 | 0.107343 | 0.220422 | 0.486989 | 0.38341  | 0.000259 | -1.03804 |
| Q92619_agSPSPSPEGLR_S5_1                           | Q92619 | ARHGAP45 | 23526 Rho GTPase activating protein 45                                    | S25               |                               | 91.63 | KNRAGSPSPSPEGL      | 0.182575 | 0.166148 | 0.138413 | 0.086476 | 0.121943 | 0.049885 | 0.086011 | 0.161012 | 0.534751 | 0.63367  | 0.040883 | -0.90306 |
| Q92619_ksFNVDVARPEAAGSPPEEGGTGPk_S2_1              | Q92619 | ARHGAP45 | 23526 Rho GTPase activating protein 45                                    | S577              |                               | 77.26 | PVMRKSvFNVDVAR      | 0.209182 | 0.180523 | 0.216522 | 0.152798 | 0.166276 | 0.118717 | 0.14593  | 0.20276  | 0.722157 | 0.751571 | 0.035043 | -0.46962 |
| Q92619_sFNVDVARPEAAGSPPEEGGTGPk_S1_S2_1            | Q92619 | ARHGAP45 | 23526 Rho GTPase activating protein 45                                    | S577.S578         | 49.98;49.98                   |       | PVMRKSvFNVDVAR_VMI  | 0.213538 | 0.206627 | 0.297619 | 0.106807 | 0.144161 | 0.090991 | 0.113986 | 0.239964 | 0.476409 | 0.50194  | 0.019595 | -1.06973 |
| Q92619_sFNVDVARPEAAGSPPEEGGTGPk_S1_S2_Si           | Q92619 | ARHGAP45 | 23526 Rho GTPase activating protein 45                                    | S577.S578.S582    | 33.33;33.33;33.33             |       |                     |          |          |          |          |          |          |          |          |          |          |          |          |



|                                                    |        |         |                                                              |                   |                         |                               |          |          |          |          |          |          |          |          |          |          |          |          |
|----------------------------------------------------|--------|---------|--------------------------------------------------------------|-------------------|-------------------------|-------------------------------|----------|----------|----------|----------|----------|----------|----------|----------|----------|----------|----------|----------|
| Q9609_rIDFPVSPAPSTR_S8_S12_2                       | Q96E09 | FAM122A | 116224 family with sequence similarity 122A                  | 5143.5147         | 100:90.95               | RIDFIPVSPAPSTR_IP             | 0.265313 | 0.212229 | 0.242165 | 0.160879 | 0.148549 | 0.088849 | 0.132759 | 0.239902 | 0.553388 | 0.646163 | 0.101663 | -0.85364 |
| Q9609_rIDFPVSPAPSTR_S8_S12_T14_2                   | Q96E09 | FAM122A | 116224 family with sequence similarity 122A                  | 5143.5147_T149    | 100:50:50               | RIDFIPVSPAPSTR_IP             | 0.240199 | 0.24251  | 0.199181 | 0.140077 | 0.148103 | 0.082534 | 0.123571 | 0.227298 | 0.543657 | 0.634375 | 0.104251 | -0.87923 |
| Q9609_rIDFPVSPAPSTR_S8_T14_2                       | Q96E09 | FAM122A | 116224 family with sequence similarity 122A                  | 5143.T149         | 90:50:89.11             | RIDFIPVSPAPSTR_VSI            | 0.231504 | 0.231589 | 0.202691 | 0.165744 | 0.190321 | 0.129121 | 0.161729 | 0.221296 | 0.728745 | 0.452771 | 0.404824 | -0.45651 |
| Q9609_rNSAPLIHGLSDTSPVQAEAPASAR_S12_1              | Q96E09 | FAM122A | 116224 family with sequence similarity 122A                  | 545               | 545                     | APLIHGLSDTSPVQAEAPASAR        | 0.193464 | 0.222368 | 0.155662 | 0.106558 | 0.117682 | 0.106692 | 0.11031  | 0.179165 | 0.615693 | 0.602547 | 0.304911 | -0.69972 |
| Q9609_rNSAPLIHGLSDTSPVQAEAPASAR_S4_1               | Q96E09 | FAM122A | 116224 family with sequence similarity 122A                  | 537               | 537                     | APLIHGLSDTSPVQAEAPASAR        | 0.193689 | 0.193174 | 0.209663 | 0.121443 | 0.143348 | 0.106178 | 0.123656 | 0.198842 | 0.612882 | 0.405624 | 0.300381 | -0.68529 |
| Q9609_rNSAPLIHGLSDTSPVQAEAPASAR_S11_1              | Q96E09 | FAM122A | 116224 family with sequence similarity 122A                  | 545               | 545                     | APLIHGLSDTSPVQAEAPASAR        | 0.27736  | 0.277682 | 0.231703 | 0.179951 | 0.156905 | 0.134644 | 0.157167 | 0.245581 | 0.639978 | 0.795241 | 0.310328 | -0.64391 |
| Q9609_rNSAPLIHGLSDTSPVQAEAPASAR_S31_1              | Q96E09 | FAM122A | 116224 family with sequence similarity 122A                  | 537.545           | 44.5:44.5               | APLIHGLSDTSPVQAEAPASAR        | 0.22736  | 0.227778 | 0.255386 | 0.158494 | 0.134252 | 0.09782  | 0.130189 | 0.202086 | 0.591266 | 0.747077 | 0.305335 | -0.75812 |
| Q96P0_rLsAPLPSGDPEK_S3_1                           | Q96P0  | RNF31   | 55072 ring finger protein 31                                 | 5466              |                         | PGPRLSAPLPSGCC                | 0.197484 | 0.202729 | 0.249413 | 0.120435 | 0.139927 | 0.148493 | 0.136285 | 0.216542 | 0.629371 | 0.403827 | 0.122125 | -0.66802 |
| Q96P0_rLsAPLPSGDPEKQR_S3_1                         | Q96P0  | RNF31   | 55072 ring finger protein 31                                 | 5466              |                         | PGPRLSAPLPSGCC                | 0.150392 | 0.203062 | 0.182159 | 0.096325 | 0.133365 | 0.136481 | 0.122057 | 0.178548 | 0.683649 | 0.830041 | 0.047619 | -0.54867 |
| Q96E28_p2TPVPSPAPALTRK_S3_1                        | Q96E28 | MCRS1   | 10445 microspherule protein 1                                | 5102              |                         | KVKSAPTPVCLP                  | 0.186034 | 0.146364 | 0.150387 | 0.09251  | 0.109768 | 0.117404 | 0.106561 | 0.160928 | 0.662164 | 0.508738 | 0.020403 | -0.59474 |
| Q96F46_pEQSQAALDPLVGEEGAIVAK_S4_1                  | Q96F46 | IL17RA  | 23765 interleukin 17 receptor A                              | 5629              |                         | PLVREPSTPQVFLAID              | 0.180169 | 0.200688 | 0.172317 | 0.067048 | 0.107288 | 0.127869 | 0.100735 | 0.184391 | 0.54631  | 0.36635  | 0.013335 | -0.87221 |
| Q96F46_ILALGEGEACLLGSPGAGR_S15_1                   | Q96F46 | IL17RA  | 23765 interleukin 17 receptor A                              | 5708              |                         | EACPLLGSFGAGRDL               | 0.199706 | 0.210197 | 0.198895 | 0.114963 | 0.105243 | 0.093717 | 0.104641 | 0.202933 | 0.515643 | 0.519943 | 0.000161 | -0.95556 |
| Q96F54_qLHLQLDQGGPPGGDLAER_S12_1                   | Q96F54 | SIPA1   | 6494 signal-induced proliferation-associated 1               | 5817              |                         | LCLDQGGSPFGGDL                | 0.191686 | 0.237997 | 0.213059 | 0.100198 | 0.127793 | 0.155667 | 0.127886 | 0.214247 | 0.596908 | 0.822445 | 0.041395 | -0.74442 |
| Q96G3_S_RIPSLPQEMQTPDDEPPEPSPSTLVR_S5_1            | Q96G3  | LIN37   | 55957 lin-37 DREAM Muvb core complex component               | 5182              |                         | ACRSRIPSPQLQPMQ               | 0.228271 | 0.248636 | 0.265671 | 0.104646 | 0.127771 | 0.103397 | 0.111938 | 0.247526 | 0.452227 | 0.699076 | 0.000538 | -1.14488 |
| Q96HA1_ssmSSMLTGAYASGIPSSR_S2_S3_1                 | Q96HA1 | POM121  | 9883 POM121 transmembrane nucleoporin                        | 5392.5393         | 47.34:47.34             | SMSSMLTGAYASGIPSSR            | 0.200335 | 0.261592 | 0.231215 | 0.193896 | 0.15305  | 0.137406 | 0.16145  | 0.231047 | 0.698776 | 0.951138 | 0.046389 | -0.5171  |
| Q96I25_smGGAAIAPPSTLVEK_S1_1                       | Q96I25 | RBM17   | 84991 RNA binding motif protein 17                           | 5169              |                         | ERERRRKSMGGAAIA               | 0.17882  | 0.217178 | 0.208139 | 0.081018 | 0.109916 | 0.105469 | 0.098801 | 0.191379 | 0.490622 | 0.751641 | 0.002192 | -1.02732 |
| Q96I25_sPTGPSNFLANMGGTVAHK_S1_1                    | Q96I25 | RBM17   | 84991 RNA binding motif protein 17                           | 5222              |                         | EQDRPRSPSTGNSA                | 0.17905  | 0.189911 | 0.208635 | 0.137049 | 0.127796 | 0.114886 | 0.126577 | 0.202532 | 0.657433 | 0.712385 | 0.0036   | -0.60508 |
| Q96I25_sPTGPSNFLANMGGTVAHK_S6_1                    | Q96I25 | RBM17   | 84991 RNA binding motif protein 17                           | 5227              |                         | PDRPTGPSNFLAN                 | 0.169911 | 0.187766 | 0.162084 | 0.119359 | 0.13462  | 0.087784 | 0.113921 | 0.173254 | 0.675541 | 0.465876 | 0.019639 | -0.60485 |
| Q96I25_sPTGPSNFLANMGGTVAHK_T3_1                    | Q96I25 | RBM17   | 84991 RNA binding motif protein 17                           | 7224              |                         | QRSPPTGPSNFLAN                | 0.157951 | 0.207823 | 0.193866 | 0.103307 | 0.128894 | 0.079963 | 0.104055 | 0.186546 | 0.557795 | 0.950046 | 0.015817 | -0.84219 |
| Q96I8_IRREsGYQENR_S5_1                             | Q96I8  | LRCH3   | 84859 leucine rich repeats and calponin homology domain cont | 5352              |                         | EQRLRRREsGYQENR               | 0.254871 | 0.203955 | 0.194637 | 0.065844 | 0.081136 | 0.051237 | 0.066072 | 0.217821 | 0.303332 | 0.350688 | 0.001814 | -1.72103 |
| Q96I8_rIsHGGSPVKVAIR_S3_1                          | Q96I8  | LRCH3   | 84859 leucine rich repeats and calponin homology domain cont | 5452              |                         | Y190557_rIsHGGSPVKVAIR        | 0.190557 | 0.205544 | 0.210936 | 0.152192 | 0.124808 | 0.138651 | 0.13855  | 0.202346 | 0.68472  | 0.745207 | 0.008078 | -0.54641 |
| Q96I88_rTsAYTLAPINR_S3_1                           | Q96I88 | EPST11  | 94240 epithelial stromal interaction 1                       | 565               |                         | HAGGRTTsAYTLAPINR             | 0.345726 | 0.454628 | 0.231484 | 0.057025 | 0.066696 | 0.045352 | 0.056357 | 0.343946 | 0.163856 | 0.018282 | 0.055545 | -2.6095  |
| Q96IM3_eTDPKVPSPLEHQK_S7_1                         | Q96IM3 | CHAMP1  | 283489 chromosome alignment maintaining phosphoprotein 1     | 5108              |                         | KETDVPKVPSPLEHQK              | 0.245053 | 0.222788 | 0.294321 | 0.146359 | 0.112436 | 0.114596 | 0.124643 | 0.205494 | 0.48991  | 0.424204 | 0.004533 | -1.02941 |
| Q96IM3_kPGPLSPFIRSPAGSPFLR_S7_S12_S16_2            | Q96IM3 | CHAMP1  | 283489 chromosome alignment maintaining phosphoprotein 1     | 5472.5432.5436    | 100:50:50               | KPGPLSPFIRSPAGSPFLR           | 0.15968  | 0.158066 | 0.17908  | 0.12298  | 0.112015 | 0.097161 | 0.110719 | 0.165609 | 0.668555 | 0.897755 | 0.005519 | -0.58088 |
| Q96IM3_kPGPLSPDLWK_S5_1                            | Q96IM3 | CHAMP1  | 283489 chromosome alignment maintaining phosphoprotein 1     | 5445              |                         | LRKRKPSGDLWKLS                | 0.177259 | 0.20376  | 0.164047 | 0.098051 | 0.144417 | 0.106685 | 0.118181 | 0.181689 | 0.604572 | 0.804302 | 0.028627 | -0.64257 |
| Q96IM3_kPSPSEPEPWKPPFAVSPPEPR_S7_1                 | Q96IM3 | CHAMP1  | 283489 chromosome alignment maintaining phosphoprotein 1     | 5286              |                         | RKSPSEPEPWKPP                 | 0.161163 | 0.20992  | 0.206514 | 0.104997 | 0.150044 | 0.130438 | 0.128493 | 0.192532 | 0.667384 | 0.815533 | 0.034986 | -0.58341 |
| Q96IP5_rRSPSARPPDVGQPPQAAK_S3_S4_S2_2              | Q96IP5 | ZFP91   | 80829 ZFP91 zinc finger protein                              | 582.583           | 99.66:97.91             | YPRRRRrRSPSARPPDVGQPPQAAK     | 0.187281 | 0.282843 | 0.156459 | 0.118173 | 0.084082 | 0.119571 | 0.125741 | 0.245542 | 0.562581 | 0.609588 | 0.023067 | -0.90911 |
| Q96IP5_rRSPSARPPDVGQPPQAAK_S4_S6_2                 | Q96IP5 | ZFP91   | 80829 ZFP91 zinc finger protein                              | 582.583.585       | 54.14:91.72:54.14       | YPRRRRrRSPSARPPDVGQPPQAAK     | 0.171891 | 0.191637 | 0.215107 | 0.166356 | 0.142695 | 0.108652 | 0.139234 | 0.195245 | 0.371126 | 0.507573 | 0.00747  | -0.48777 |
| Q96IP5_rRSPSARPPDVGQPPQAAK_S4_S6_2                 | Q96IP5 | ZFP91   | 80829 ZFP91 zinc finger protein                              | 583.585           | 92.63:99.38             | YPRRRRrRSPSARPPDVGQPPQAAK     | 0.214004 | 0.198023 | 0.191776 | 0.117772 | 0.118477 | 0.077097 | 0.104449 | 0.204001 | 0.521199 | 0.303902 | 0.02956  | -0.9401  |
| Q96IP5_rRSPSARPPDVGQPPQAAK_S2_S3_1                 | Q96IP5 | ZFP91   | 80829 ZFP91 zinc finger protein                              | 582.583           | 46.16:46.16             | YPRRRRrRSPSARPPDVGQPPQAAK     | 0.183146 | 0.195078 | 0.19445  | 0.118393 | 0.131671 | 0.10751  | 0.119191 | 0.190891 | 0.624394 | 0.470857 | 0.008853 | -0.67947 |
| Q96IP5_rRSPSARPPDVGQPPQAAK_S3_1                    | Q96IP5 | ZFP91   | 80829 ZFP91 zinc finger protein                              | 583               |                         | YPRRRRrRSPSARPPDVGQPPQAAK     | 0.174822 | 0.200695 | 0.174956 | 0.118086 | 0.13359  | 0.097194 | 0.11629  | 0.183378 | 0.614155 | 0.805555 | 0.007949 | -0.65709 |
| Q96IP5_rRSPSARPPDVGQPPQAAK_S5_1                    | Q96IP5 | ZFP91   | 80829 ZFP91 zinc finger protein                              | 583               |                         | RRRRRrRSPSARPPDVGQPPQAAK      | 0.195488 | 0.185153 | 0.19358  | 0.135033 | 0.128571 | 0.100544 | 0.121383 | 0.191407 | 0.634162 | 0.165112 | 0.001376 | -0.65708 |
| Q96IP5_rRSPSARPPDVGQPPQAAK_S2_1                    | Q96IP5 | ZFP91   | 80829 ZFP91 zinc finger protein                              | 585               |                         | YPRRRRrRSPSARPPDVGQPPQAAK     | 0.183889 | 0.251432 | 0.199824 | 0.094054 | 0.139576 | 0.098375 | 0.110668 | 0.211715 | 0.527272 | 0.67243  | 0.015621 | -0.93588 |
| Q96IP5_rRSPSARPPDVGQPPQAAK_S2_S4_1                 | Q96IP5 | ZFP91   | 80829 ZFP91 zinc finger protein                              | 583.585           | 47.64:47.64             | YPRRRRrRSPSARPPDVGQPPQAAK     | 0.168703 | 0.227511 | 0.189758 | 0.084883 | 0.134822 | 0.085722 | 0.101809 | 0.195234 | 0.521233 | 0.958809 | 0.017216 | -0.94    |
| Q96IV6_sFQSLACSGLPAADR_S8_1                        | Q96IV6 | PDLM2   | 64236 PD2 and LIM domain 2                                   | 5161              |                         | YFRSLACSGLPAADR               | 0.200504 | 0.225338 | 0.25877  | 0.102589 | 0.148409 | 0.13873  | 0.142042 | 0.226224 | 0.666376 | 0.696979 | 0.041826 | -0.684   |
| Q96K21_wSPQNKY_S2_1                                | Q96K21 | ZFYVE19 | 84936 zinc finger FYVE-type containing 19                    | 5144              |                         | SAKASWSPQNKY                  | 0.16378  | 0.194815 | 0.154129 | 0.079011 | 0.106063 | 0.087213 | 0.088942 | 0.170908 | 0.52041  | 0.416292 | 0.02628  | -0.94228 |
| Q96L91_tPGVLLPGEAGGAAGFmTSPPTSPR_S18_S19_T7_Q96L91 | Q96L91 | EP400   | 57634 E1A binding protein p400                               | 7314.5315.7320.53 | 50.04:50.04:46.64:46.64 | AGAGFmTSPPTSPR                | 0.151719 | 0.137119 | 0.171988 | 0.108912 | 0.124043 | 0.097198 | 0.110051 | 0.153608 | 0.716438 | 0.742703 | 0.00688  | -0.48109 |
| Q96P5_sFNPMDSLDMQDMPSESSR_S1_1                     | Q96P5  | MIA2    | 4253 melanoma inhibitory activity 2                          | 51250             |                         | SPKPAELRSFNPMDSLDMQDMPSESSR   | 0.173802 | 0.187305 | 0.24297  | 0.078931 | 0.102102 | 0.073533 | 0.084855 | 0.201359 | 0.421412 | 0.292612 | 0.007054 | -1.2467  |
| Q96P6_qQGNAYDAGQPSAAYLMSQGVANANSTPPY_Q96P6         | Q96P6  | RBM14   | 10432 RNA binding motif protein 14                           | 5571.7572         | 49.99:49.99             | QGNAYDAGQPSAAYLMSQGVANANSTPPY | 0.179354 | 0.203577 | 0.17819  | 0.118857 | 0.127032 | 0.111809 | 0.119423 | 0.187034 | 0.637471 | 0.440658 | 0.009396 | -0.64957 |
| Q96P6_qQGNAYDAGQPSAAYLMSQGVANANSTPPY_Q96P6         | Q96P6  | RBM14   | 10432 RNA binding motif protein 14                           | 7572              |                         | QGNAYDAGQPSAAYLMSQGVANANSTPPY | 0.164488 | 0.191441 | 0.165839 | 0.101671 | 0.131596 | 0.114194 | 0.115821 | 0.173929 | 0.665906 | 0.988777 | 0.009229 | -0.58661 |
| Q96P6_qTPFFGR_T3_1                                 | Q96P6  | RBM14   | 10432 RNA binding motif protein 14                           | T506              |                         | QVQARTPFFGR                   | 0.177563 | 0.186762 | 0.154578 | 0.080657 | 0.11803  | 0.07911  | 0.117921 | 0.172901 | 0.612419 | 0.656884 | 0.018056 | -0.68011 |
| Q96P6_rLsEQSLFR_S3_1                               | Q96P6  | RBM14   | 10432 RNA binding motif protein 14                           | 5618              |                         | LSYRLSLEEQSLFR                | 0.214127 | 0.258893 | 0.192293 | 0.050043 | 0.081648 | 0.070738 | 0.067476 | 0.221717 | 0.304262 | 0.365416 | 0.002061 | -1.71661 |
| Q96P6_rLsEQSLFR_S3_QH_Q96P6                        | Q96P6  | RBM14   | 10432 RNA binding motif protein 14                           | 5520              |                         | AAQYRLSLEEQSLFR               | 0.208201 | 0.242673 | 0.189984 | 0.095393 | 0.119878 | 0.125211 | 0.113494 | 0.213619 | 0.531292 | 0.521934 | 0.005085 | -0.91242 |
| Q96PY5_ILQEALMEQDQPKSPSHK_S15_1                    | Q96PY5 | FMNL2   | 114793 formin like 2                                         | 51016             |                         | MEQDQPKSPSHKSR                | 0.204936 | 0.252862 | 0.200737 | 0.098084 | 0.159958 | 0.129264 | 0.129102 | 0.215999 | 0.597698 | 0.963692 | 0.027862 | -0.74251 |
| Q96PY5_ILQEALMEQDQPKSPSHK_S15_S17_1                | Q96PY5 | FMNL2   | 114793 formin like 2                                         | 51016.S1018       | 50:50                   | MEQDQPKSPSHKSR                | 0.1945   |          |          |          |          |          |          |          |          |          |          |          |

|                                               |        |          |                                                                   |                  |                    |                         |                  |          |          |          |          |          |          |          |          |          |          |          |          |
|-----------------------------------------------|--------|----------|-------------------------------------------------------------------|------------------|--------------------|-------------------------|------------------|----------|----------|----------|----------|----------|----------|----------|----------|----------|----------|----------|----------|
| Q99684_sEFEDFWRPPSPsAsPASEK_S12_S16_2         | Q99684 | GFI1     | 2672 growth factor independent 1 transcriptional repressor        | 594.598          | 98.96;98.96        | EDFWRPPSPSPAS.PAS.RP    | 0.218612         | 0.165347 | 0.183802 | 0.155072 | 0.118955 | 0.129472 | 0.134499 | 0.189253 | 0.710684 | 0.64099  | 0.044551 | -0.49272 |          |
| Q99700_qNiGNTPSGVLSPAGQGHITPAEVAAMPiAASPTPA   | Q99700 | ATXN2    | 6311 ataxin 2                                                     | 5697             |                    | 93.79                   | PRSPGNSIGNTPSK   | 0.160654 | 0.159746 | 0.157578 | 0.097974 | 0.109999 | 0.057303 | 0.082359 | 0.159326 | 0.516199 | 0.007121 | 0.036751 | -0.95199 |
| Q99728_qTVSPENIPLFcsPPSck_S1_1                | Q99728 | BARD1    | 580 BRCA1 associated RING domain 1                                | 5364             |                    | 99.41                   | IPFLPCCSPPFCKRG  | 0.207911 | 0.191534 | 0.180462 | 0.106709 | 0.124516 | 0.141782 | 0.124336 | 0.193002 | 0.643219 | 0.765515 | 0.00588  | -0.63662 |
| Q99B27_rTFSFQK_S3_1                           | Q99B27 | MAPKAP1  | 79109 mitogen-activated protein kinase associated protein 1       | 5510             |                    | 94.11                   | RKLNNRSTFFSFKKKE | 0.262345 | 0.193299 | 0.190554 | 0.091085 | 0.098096 | 0.125427 | 0.104669 | 0.203939 | 0.515583 | 0.907009 | 0.003181 | -0.95572 |
| Q99B27_rTFSFQK_T2_S3_1                        | Q99B27 | MAPKAP1  | 79109 mitogen-activated protein kinase associated protein 1       | T509.S510        | 50:50              |                         | 0.219072         | 0.212527 | 0.155831 | 0.075152 | 0.104939 | 0.139255 | 0.106449 | 0.19581  | 0.546363 | 0.919401 | 0.030748 | -0.8793  |          |
| Q99B0F_rPSeSIIETEGK_S3_1                      | Q99B0F | SENP7    | 57337 SUMO1/sentrin specific peptidase 7                          | 5111             |                    | 98.98                   | RKLGRPPSSSEIITE  | 0.255456 | 0.199734 | 0.24445  | 0.09647  | 0.097965 | 0.084877 | 0.093104 | 0.233213 | 0.399223 | 0.11128  | 0.00133  | -1.32473 |
| Q99QG0_sPLSQGAK_S3_1                          | Q99QG0 | MYBBP1A  | 10514 MYBB binding protein 1a                                     | 51310            |                    |                         | 0.200979         | 0.17896  | 0.140911 | 0.087735 | 0.109207 | 0.097443 | 0.098129 | 0.197167 | 0.136522 | 0.22254  | 0.015397 | -0.82316 |          |
| Q99BQ3_kPPGTPPPLGAPPPDPLPPPTPEDSLETGFS        | Q99BQ3 | GORASP3  | 64689 poly(ribose) stacking protein 1                             | T16.5220         | 50:50              |                         | 0.1784           | 0.193195 | 0.16925  | 0.107819 | 0.151594 | 0.07486  | 0.111424 | 0.180282 | 0.618056 | 0.179371 | 0.01417  | -0.69419 |          |
| Q99RP8_rLTKLVEEATLAQLPSAPQGRS_S6_1            | Q99RP8 | PYM1     | 84305 PYM homolog 1, exon junction complex associated factor 11   | 5216             |                    | 100                     | STLTKDVVLEETAAL  | 0.216636 | 0.229398 | 0.268634 | 0.119208 | 0.145103 | 0.142283 | 0.155235 | 0.246556 | 0.549699 | 0.667381 | 0.04474  | -0.86329 |
| Q99RP8_rLTKLVEEATLAQLPSAPQGRS_T1_10_1         | Q99RP8 | PYM1     | 84305 PYM homolog 1, exon junction complex associated factor 11   | T11.2.1121       | 47:05;47:05        |                         | EAEALSRLLDKVPSLE | 0.191433 | 0.239601 | 0.224434 | 0.102993 | 0.138905 | 0.13014  | 0.124013 | 0.218489 | 0.567591 | 0.732563 | 0.006131 | -0.81708 |
| Q99RQ0_sNTQGYSHLEFAFPTTMMVHDHLVANSPPDFEDFG    | Q99RQ0 | PYGO2    | 90780 pygopus family PHD finger 2                                 | 548              |                    | 81.98                   | PEKRRKRSNTQGPAY  | 0.263647 | 0.398595 | 0.279091 | 0.1017   | 0.154317 | 0.084759 | 0.113592 | 0.313778 | 0.362015 | 0.388623 | 0.013545 | -1.46588 |
| Q99RZ2_eEQAGTLEEDRAQHPHEDGGQPDR_T14_1         | Q99RZ2 | TRIM5E   | 81844 tripartite motif containing 56                              | T442             |                    | 100                     | LEEDRAQTPEHEDGGP | 0.190971 | 0.247054 | 0.233069 | 0.119801 | 0.140708 | 0.070493 | 0.110334 | 0.223698 | 0.493229 | 0.792021 | 0.013341 | -1.01967 |
| Q99TA9_iSTPQNTVPIKPLIstTPVVSQK_S2_T17_2       | Q99TA9 | WAC      | 51322 WW domain containing adaptor with coiled-coil               | 5456.T471        | 87:9;8.9.48        |                         | 0.180792         | 0.146547 | 0.144359 | 0.078233 | 0.094155 | 0.083662 | 0.08535  | 0.157233 | 0.542826 | 0.27127  | 0.004787 | -0.88144 |          |
| Q99TA9_iSTPQNTVPIKPLIstTPVVSQK_T3_T17_2       | Q99TA9 | WAC      | 51322 WW domain containing adaptor with coiled-coil               | 5457.T471        | 87:02;89.14        |                         | 0.197191         | 0.17694  | 0.171504 | 0.110241 | 0.126759 | 0.090024 | 0.109008 | 0.181878 | 0.599343 | 0.702427 | 0.005239 | -0.73855 |          |
| Q99TC0_rNsvERPAAVAGAATPSLVEQQK_S3_1           | Q99TC0 | DIDO1    | 11083 death inducer-obliterator 1                                 | T1035.S1036.S104 | 39:38;39:38;80:85  | 100                     | CADVRRNSVERPAEP  | 0.156417 | 0.173911 | 0.17473  | 0.126734 | 0.140583 | 0.110896 | 0.126071 | 0.168353 | 0.748851 | 0.65315  | 0.015531 | -0.41725 |
| Q99TC0_vLsvPSPNISTeSRpPEGDTLFLSR_T12_S13_S17  | Q99TC0 | DIDO1    | 11083 death inducer-obliterator 1                                 | T1035.S1036.S104 | 39:38;39:38;80:85  | 100                     | PSPNISTeSRSPPL   | 0.181671 | 0.203475 | 0.240774 | 0.12598  | 0.163559 | 0.087197 | 0.125578 | 0.20864  | 0.60189  | 0.759857 | 0.041268 | -0.73243 |
| Q99TV6_aPswSvPNLGTK_S3_1                      | Q99TV6 | DPH7     | 92715 diphthamide biosynthesis 7                                  | 5353             |                    | 99.93                   | RSLGQAPSPSPQSE   | 0.188072 | 0.206648 | 0.210717 | 0.102807 | 0.135287 | 0.131414 | 0.123169 | 0.202022 | 0.609887 | 0.607196 | 0.003018 | -0.71387 |
| Q99U76_rPAEATSPSPERPR_T10_1                   | Q99U76 | C1orf35  | 79169 chromosome 1 open reading frame 35                          | T219             |                    | 93.69                   | AEATSPSPSPERPR   | 0.166157 | 0.193948 | 0.206454 | 0.105544 | 0.132483 | 0.05913  | 0.099052 | 0.188553 | 0.524495 | 0.472135 | 0.021508 | -0.931   |
| Q99U76_rPAEATSPSPERPR_T10_S11_1               | Q99U76 | C1orf35  | 79169 chromosome 1 open reading frame 35                          | T172.S220        | 50:50              |                         | 0.16393          | 0.211143 | 0.167211 | 0.096507 | 0.120729 | 0.068104 | 0.095113 | 0.180761 | 0.526182 | 0.991255 | 0.016392 | -0.92637 |          |
| Q99UB5_aTdsLPGKFDGMYK_S4_1                    | Q99UB5 | MKNK1    | 8569 MAP kinase interacting serine/threonine kinase 1             | 539              |                    | 99.26                   | RGARTDLSLPGKFDG  | 0.167422 | 0.235139 | 0.207335 | 0.083835 | 0.145094 | 0.10993  | 0.112923 | 0.203298 | 0.555603 | 0.898466 | 0.026683 | -0.84787 |
| Q99UH6_kPRPAGQFLPDDPQR_S2_1                   | Q99UH6 | PAXX     | 286257 PAXX non-homologous end joining factor                     | 5152             |                    | 100                     | TAVSFRKSPFAGFQ   | 0.179936 | 0.201756 | 0.207302 | 0.142841 | 0.150349 | 0.106448 | 0.132113 | 0.196331 | 0.678511 | 0.550322 | 0.016293 | -0.55956 |
| Q99VJ6_kRsELQDAEPAQSQETK_S3_S6_1              | Q99VJ6 | UTP14A   | 10813 UTP14A small subunit processome component                   | 5434.S437        | 50:50              |                         | 0.226511         | 0.247852 | 0.2952   | 0.2121   | 0.146669 | 0.131536 | 0.163442 | 0.256521 | 0.63715  | 0.805404 | 0.043673 | -0.6503  |          |
| Q99VP2_sFILDK_S1_1                            | Q99VP2 | GNL3     | 26354 G protein nucleolar 3                                       | 5429             |                    | 100                     | AGESQTRSFLLDKI1  | 0.188036 | 0.174004 | 0.156093 | 0.092042 | 0.119827 | 0.061869 | 0.091246 | 0.171011 | 0.528317 | 0.467528 | 0.013040 | -0.92052 |
| Q99W19_aPQLSLGSR_S3_1                         | Q99W19 | KIFC1    | 3833 kinesin family member C1                                     | 526              |                    | 100                     | RPLIKAPQLPLGSS   | 0.425986 | 0.39317  | 0.248971 | 0.070215 | 0.083315 | 0.071858 | 0.075129 | 0.356043 | 0.211012 | 0.011421 | 0.034826 | -2.2446  |
| Q99W61_aSNRRPsvVLPTR_S7_1                     | Q99W61 | DDA1     | 79016 DET1 and DDB1 associated 1                                  | 533              |                    | 79.13                   | KASNRPSVLYPTRE   | 0.204037 | 0.190493 | 0.179797 | 0.09501  | 0.124179 | 0.095284 | 0.104291 | 0.191442 | 0.54755  | 0.688715 | 0.001924 | -0.86894 |
| Q99WT3_rPKLPEPSSVPPANNIR_S3_1                 | Q99WT3 | PAPOLG   | 64895 poly (A) polymerase gamma                                   | 5708             |                    | 100                     | SRKRRLPKSKELEPSS | 0.193833 | 0.213859 | 0.229138 | 0.126909 | 0.12404  | 0.188614 | 0.146521 | 0.212277 | 0.690235 | 0.381271 | 0.044837 | -0.53484 |
| Q99WT3_rPKLPEPSSVPPANNIR_S4_1                 | Q99WT3 | PAPOLG   | 64895 poly (A) polymerase gamma                                   | 5708             |                    | 98.76                   | SRKRRLPKSKELEPSS | 0.246612 | 0.222619 | 0.278636 | 0.125397 | 0.112418 | 0.185367 | 0.14106  | 0.24989  | 0.565851 | 0.685556 | 0.017489 | -0.82151 |
| Q99WU0_aSSQLSESPQDSDLAFSEM_K11_1              | Q99WU0 | SLCA41AP | 22950 solute carrier family 4 member 1 adaptor protein            | 5532             |                    | 100                     | QVLESSESPQDSDLAF | 0.19214  | 0.177842 | 0.203355 | 0.089866 | 0.114042 | 0.107601 | 0.103536 | 0.191173 | 0.541585 | 0.988479 | 0.009156 | -0.88474 |
| Q99XB4_rPKSLPSTGTELEPK_S5_1                   | Q99XB4 | OSBP11   | 114885 oxysterol binding protein like 11                          | 5289             |                    | 83.2                    | HQKGLSPSTGTELEPK | 0.268814 | 0.293258 | 0.338824 | 0.106517 | 0.142496 | 0.02889  | 0.092634 | 0.266966 | 0.346689 | 0.631323 | 0.009257 | -1.52704 |
| Q99XB4_rPKSLPSTGTELEPK_S3_1                   | Q99XB4 | OSBP11   | 114885 oxysterol binding protein like 11                          | 5189             |                    | 100                     | PTSQRRSPQNALIFF  | 0.185632 | 0.173711 | 0.150253 | 0.136294 | 0.117224 | 0.108333 | 0.120617 | 0.169865 | 0.710074 | 0.772917 | 0.020621 | -0.49396 |
| Q99XB4_rPKSLPSTGTELEPK_S1_S3_1                | Q99XB4 | OSBP11   | 114885 oxysterol binding protein like 11                          | 5172.S174        | 50:50              |                         | NPFLLSRSPQNALIFF | 0.159175 | 0.179458 | 0.138358 | 0.051351 | 0.078512 | 0.064038 | 0.064634 | 0.158997 | 0.406508 | 0.608537 | 0.006279 | -1.29864 |
| Q99XB4_rPKSLPSTGTELEPK_S1_S3_1                | Q99XB4 | OSBP11   | 114885 oxysterol binding protein like 11                          | 5174             |                    | 100                     | PLKRRPSTGTELEPK  | 0.248352 | 0.22276  | 0.165125 | 0.047533 | 0.059755 | 0.060444 | 0.055911 | 0.210729 | 0.263631 | 0.056428 | 0.00331  | -1.92341 |
| Q99BK1_rGPGAAGPGAsPASSSAASSPSSGR_S11_1        | Q99BK1 | KLF16    | 83855 Kruppel like factor 16                                      | 599              |                    | 99.99                   | GKRRGASPGASSSSA  | 0.27094  | 0.250239 | 0.280777 | 0.111708 | 0.096827 | 0.084954 | 0.098763 | 0.263956 | 0.850321 | 0.00014  | -1.45022 |          |
| Q99BK1_rGPGAAGPGAsPASSSAASSPSSGR_S21_1        | Q99BK1 | KLF16    | 83855 Kruppel like factor 16                                      | 5109             |                    | 96.57                   | SSSAASSPSSGR     | 0.180615 | 0.194339 | 0.153866 | 0.127856 | 0.134681 | 0.099444 | 0.12057  | 0.176274 | 0.689495 | 0.900879 | 0.025473 | -0.54794 |
| Q99BK1_rGPGAAGPGAsPASSSAASSPSSGR_S5_S5_1      | Q99BK1 | KLF16    | 83855 Kruppel like factor 16                                      | 5226.S228        | 43:97;43.97        |                         | RSGASRSPSSGR     | 0.219169 | 0.251307 | 0.202562 | 0.102998 | 0.16072  | 0.173416 | 0.157112 | 0.223436 | 0.649496 | 0.607211 | 0.038844 | -0.62924 |
| Q99BK1_rGPGAAGPGAsPASSSAASSPSSGR_T2_S3_1      | Q99BK1 | KLF16    | 83855 Kruppel like factor 16                                      | 5226.S226        | 35:74;35.74        |                         | RRPGARSTSGDLSPE  | 0.232453 | 0.257979 | 0.261836 | 0.131674 | 0.164791 | 0.080437 | 0.125634 | 0.250029 | 0.502478 | 0.232529 | 0.008891 | -0.99287 |
| Q99YG3_kVtGTLDFEK_S3_1                        | Q99YG3 | NIFK     | 84365 nucleolar protein interacting with the FHA domain of MI 218 | 5218             |                    | 98.98                   | RKLKKRVSGDLSPE   | 0.210554 | 0.173732 | 0.220809 | 0.129957 | 0.114364 | 0.171187 | 0.138504 | 0.204125 | 0.678519 | 0.943426 | 0.012419 | -0.55954 |
| Q99Y4_aPPELQLRRQYMEVAQALEGK_S2_1              | Q99Y4  | IFIH1    | 64135 interferon induced with helicase C domain 1                 | 5301             |                    | 100                     | ENVAARSAPEPELQL  | 0.138766 | 0.185433 | 0.200401 | 0.084864 | 0.091417 | 0.062638 | 0.07964  | 0.164747 | 0.483408 | 0.573848 | 0.006363 | -1.04869 |
| Q99Z23_rRLGSYSGPTVSR_S5_1                     | Q99Z23 | PANK2    | 80025 pantothene kinase 2                                         | 5189             |                    | 92.59                   | TRDRRLGSYSGPTV   | 0.22669  | 0.22301  | 0.204318 | 0.176923 | 0.173641 | 0.1332   | 0.161255 | 0.218006 | 0.793679 | 0.390581 | 0.022335 | -0.43503 |
| Q99Z23_rRLGSYSGPTVSR_S5_1                     | Q99Z23 | PANK2    | 80025 pantothene kinase 2                                         | 5168             |                    | 83.49                   | ELPRLRRASVAV     | 0.253971 | 0.228425 | 0.238735 | 0.085634 | 0.151243 | 0.097101 | 0.111326 | 0.240377 | 0.463129 | 0.237135 | 0.009099 | -1.11051 |
| Q99Z25_nEKPQTQSPEATSGTGSVK_S10_1              | Q99Z25 | NSD3     | 54904 nucleolar receptor binding SET domain protein 3             | 5561             |                    | 99.22                   | KPTQSPEATSGTGS   | 0.195651 | 0.165184 | 0.207478 | 0.120505 | 0.119313 | 0.119452 | 0.119757 | 0.189438 | 0.632168 | 0.008171 | 0.037102 | -0.66162 |
| Q99Z25_sLPSITMHIK_S1_1                        | Q99Z25 | NSD3     | 54904 nucleolar receptor binding SET domain protein 3             | 5478             |                    | 99.7                    | KVAARSLPSITMHIK  | 0.340619 | 0.250939 | 0.206939 | 0.090679 | 0.131072 | 0.129025 | 0.116925 | 0.288865 | 0.434884 | 0.204721 | 0.028427 | -1.2013  |
| Q99Z2F_rHGSVPMNLK_S4_1                        | Q99Z2F | OSBP17   | 114881 oxysterol binding protein like 7                           | 5272             |                    | 100                     | RVTALHGSVPMNLK   | 0.185218 | 0.224514 | 0.14142  | 0.050478 | 0.097061 | 0.054549 | 0.067363 | 0.163671 | 0.565197 | 0.101622 | -1.44746 |          |
| Q99ZQ8_rHLNFENMLPESVSLTLDKLPPTGSNQASPR_S11    | Q99ZQ8 | FAM129A  | 116496 family with sequence similarity 129 member A               | 5677             | 5577.S579.S581.S55 | 24:57;24:57;24:57;24:57 | EDNMLPESVSLTLDK  | 0.206189 | 0.191911 | 0.21481  | 0.162981 | 0.13039  | 0.116262 | 0.136544 | 0.204303 | 0.66834  | 0.377933 | 0.011589 | -0.58134 |
| Q99ZQ8_rASAILPVLGSLETSLNEVQESEEEK_S3_1        | Q99ZQ8 | FAM129A  | 116496 family with sequence similarity 129 member A               | 5602             |                    | 100                     | ASPARASAILPVLGV  | 0.26523  | 0.193503 | 0.196175 | 0.085754 | 0.107077 | 0.08472  | 0.092517 | 0.218043 | 0.423803 | 0.157118 | 0.00669  | -1.23853 |
| Q99ZQ8_rASAILPVLGSLETSLNEVQESEEEKQVEPSSLAK_S3 | Q99ZQ8 | FAM129A  | 116496 family with sequence similarity 129 member A               | 5334             |                    | 100                     | ASPARASAILPVLGV  | 0.184855 | 0.218841 | 0.234587 | 0.109958 | 0.118415 | 0.104589 | 0.110987 | 0.212761 | 0.521653 | 0.13989  | 0.002599 | -0.93884 |
| Q99ZW8_rHSPFSNITVEIIGK_S3_1                   | Q99ZW8 | CD244    | 51744 CD244 molecule                                              | 5213             |                    | 99.61                   | GRKRRLPKSKELEPSS | 0.276163 | 0.182722 | 0.231719 | 0.15222  | 0.110353 | 0.161423 | 0.141332 | 0.219171 | 0.644487 | 0.852943 | 0.033829 | -0.63297 |
| Q9C073_sLEGLNQEEIVFVK_S1_1                    | Q9C073 | FAM117A  | 81558 family with sequence similarity 117 member A                | 5213             |                    | 100                     | LPSCLHRSLEGLNQEE | 0.211681 | 0.209588 | 0.162488 | 0.128996 | 0.156547 | 0.137288 | 0.140944 | 0.194586 |          |          |          |          |

|                                             |        |          |       |                                                            |                 |                     |                                 |          |          |          |          |          |          |          |          |          |          |          |          |
|---------------------------------------------|--------|----------|-------|------------------------------------------------------------|-----------------|---------------------|---------------------------------|----------|----------|----------|----------|----------|----------|----------|----------|----------|----------|----------|----------|
| Q9H187_kasPEPPDSEAGALK_S3_1                 | Q9H187 | IRF2BPL  | 64207 | interferon regulatory factor 2 binding protein like        | 5547            | 100                 | SLRRKRKASPEPPDSE                | 0.16649  | 0.234725 | 0.1846   | 0.096522 | 0.14914  | 0.092179 | 0.112614 | 0.195272 | 0.576702 | 0.89176  | 0.039354 | -0.7941  |
| Q9H187_rkASPEPPDSEAGALK_S4_1                | Q9H187 | IRF2BPL  | 64207 | interferon regulatory factor 2 binding protein like        | 5547            | 100                 | SLRRKRKASPEPPDSE                | 0.203281 | 0.176993 | 0.228254 | 0.103836 | 0.137867 | 0.115403 | 0.119035 | 0.202843 | 0.586634 | 0.626074 | 0.009353 | -0.76888 |
| Q9H187_rnsSPSPVSPVPGQR_S3_1                 | Q9H187 | IRF2BPL  | 64207 | interferon regulatory factor 2 binding protein like        | 5657            | 98.7                | TASARRNNSSPVSPGA                | 0.266187 | 0.215145 | 0.308526 | 0.122877 | 0.115813 | 0.124999 | 0.12123  | 0.263286 | 0.460449 | 0.020939 | 0.033105 | -1.11889 |
| Q9H257_rQELTLLVLSDEDGSPRR_S11_1             | Q9H257 | CARD9    | 64170 | caspace recruitment domain family member 9                 | 5425            | 89.51               | EDTLLVLSDEDGSPRR                | 0.164599 | 0.163477 | 0.196248 | 0.113732 | 0.12766  | 0.140306 | 0.127233 | 0.194745 | 0.727982 | 0.67586  | 0.022733 | -0.45803 |
| Q9H257_rsQELSLPQLEDLTDQLSDKGLAGGSGSPK_S2_1  | Q9H257 | CARD9    | 64170 | caspace recruitment domain family member 9                 | 5425            | 161.574             | rsQELSLPQLEDLTDQLSDKGLAGGSGSPK  | 0.167574 | 0.194386 | 0.210877 | 0.116546 | 0.129627 | 0.134494 | 0.126769 | 0.190765 | 0.663902 | 0.302774 | 0.00211  | -0.59096 |
| Q9H257_rSQELSLPQLEDLTDQLSDKGLAGGSGSPK_S5_1  | Q9H257 | CARD9    | 64170 | caspace recruitment domain family member 9                 | 5439            | 90.79               | RRSQELSLPQLEDLTDQLSDKGLAGGSGSPK | 0.15695  | 0.225904 | 0.202786 | 0.11074  | 0.092334 | 0.128672 | 0.110582 | 0.203573 | 0.543204 | 0.336627 | 0.020227 | -0.88044 |
| Q9H2G2_rDsFGTPYwmaPEVwMETS_K5_1             | Q9H2G2 | SLK      | 9748  | STE20 like kinase                                          | 5189            | 95.72               | RRRQQRDSFLGTPYw                 | 0.178512 | 0.208334 | 0.220316 | 0.121348 | 0.126665 | 0.117861 | 0.121958 | 0.195721 | 0.631213 | 0.152489 | 0.001032 | -0.68241 |
| Q9H2L5_hRSFNGHGFYNNH_S4_1                   | Q9H2L5 | RASSF4   | 83937 | Ras association domain family member 4                     | 5168            | 100                 | RRRHRHFSINGHGFYNNH              | 0.215086 | 0.203315 | 0.153161 | 0.120097 | 0.142471 | 0.096445 | 0.119671 | 0.190521 | 0.628126 | 0.657659 | 0.03776  | -0.67088 |
| Q9H2L5_rPscPLKESPQNGNITAAQGSQIPVHK_S10_1    | Q9H2L5 | RASSF4   | 83937 | Ras association domain family member 4                     | 598             | 70.86               | SCPRLKESPQNGNITAAQGSQIPVHK      | 0.232734 | 0.215702 | 0.310925 | 0.17228  | 0.115314 | 0.153436 | 0.14701  | 0.283456 | 0.518638 | 0.389392 | 0.02889  | -0.9472  |
| Q9H2L5_rPscPLKESPQNGNITAAQGSQIPVHK_S3_1     | Q9H2L5 | RASSF4   | 83937 | Ras association domain family member 4                     | 591             | 86.14               | SWMPRRFSKPLKES                  | 0.212645 | 0.210774 | 0.198504 | 0.111469 | 0.103625 | 0.106669 | 0.107254 | 0.207307 | 0.517369 | 0.419075 | 3.65e-05 | -0.95073 |
| Q9H2L5_rPscPLKESPQNGNITAAQGSQIPVHK_S3_S10_1 | Q9H2L5 | RASSF4   | 83937 | Ras association domain family member 4                     | 591.598         | 45.87;45.87         | SWMPRRFSKPLKES                  | 0.241253 | 0.21501  | 0.21661  | 0.127614 | 0.095975 | 0.103702 | 0.109097 | 0.224291 | 0.486409 | 0.886062 | 0.000834 | -0.10976 |
| Q9H334_qLLQQQQQQQVSLKSPK_S17_1              | Q9H334 | FOXP1    | 27086 | forkhead box P1                                            | 583             | 100                 | QQVSGSLKSPKRNKDKQ               | 0.175655 | 0.216261 | 0.191953 | 0.117297 | 0.136372 | 0.134415 | 0.129361 | 0.194623 | 0.646677 | 0.417334 | 0.007925 | -0.58928 |
| Q9H334_rYSdKvNPISSADIAQNQEFYK_S3_Y6_1       | Q9H334 | FOXP1    | 27086 | forkhead box P1                                            | 5440.Y443       | 46.32;46.32         | GPRIrrryrSDKvNPISSADIAQNQEFYK   | 0.211939 | 0.293739 | 0.296269 | 0.123597 | 0.14229  | 0.108425 | 0.124771 | 0.167315 | 0.466754 | 0.222269 | 0.008327 | -0.19927 |
| Q9H334_rYSdKvNPISSADIAQNQEFYK_Y2_1          | Q9H334 | FOXP1    | 27086 | forkhead box P1                                            | Y439            |                     | GPRIrrryrSDKvNPISSADIAQNQEFYK   | 0.167397 | 0.265247 | 0.199029 | 0.076838 | 0.125847 | 0.082638 | 0.095108 | 0.210558 | 0.451695 | 0.446732 | 0.024249 | -1.14658 |
| Q9H334_rYSdKvNPISSADIAQNQEFYK_Y6_S11_S12_1  | Q9H334 | FOXP1    | 27086 | forkhead box P1                                            | Y443.S448.S449  | 31.02;31.02;31.02   | GPRIrrryrSDKvNPISSADIAQNQEFYK   | 0.184719 | 0.239548 | 0.223949 | 0.0783   | 0.109037 | 0.092801 | 0.093379 | 0.216072 | 0.432168 | 0.457097 | 0.00272  | -1.21033 |
| Q9H3Q1_nAMSLPQLNEK_S4_1                     | Q9H3Q1 | CDC42EP4 | 23580 | CDC42 effector protein 4                                   | 5118            |                     | LFLVNAMSLPQLNEK                 | 0.168114 | 0.165009 | 0.163426 | 0.033747 | 0.102341 | 0.0794   | 0.071836 | 0.165516 | 0.434011 | 0.009284 | 0.044753 | -1.2042  |
| Q9H4A3_kGFDTDDLHK_T3_1                      | Q9H4A3 | WNK1     | 65125 | WNK lysine deficient protein kinase 1                      | 72245           |                     | MTSRRKGFDTDDLHK                 | 0.189607 | 0.216638 | 0.227215 | 0.070561 | 0.11733  | 0.111752 | 0.099881 | 0.211154 | 0.473025 | 0.731341 | 0.003861 | -1.08001 |
| Q9H4A3_slNPPGSNLR_S3_1                      | Q9H4A3 | WNK1     | 65125 | WNK lysine deficient protein kinase 1                      | 52372           |                     | SLNPPGSNLR                      | 0.154309 | 0.142288 | 0.151817 | 0.07864  | 0.096156 | 0.122146 | 0.098881 | 0.149471 | 0.662205 | 0.154997 | 0.181504 | -0.59465 |
| Q9H4I2_rQsWHQTFDPTTK_S3_1                   | Q9H4I2 | ZHX3     | 23051 | zinc fingers and homeoboxes 3                              | 5604            |                     | HSKARQsWHQTFDPTTK               | 0.210704 | 0.197049 | 0.147177 | 0.131051 | 0.105655 | 0.104768 | 0.113824 | 0.248165 | 0.615346 | 0.322222 | 0.082604 | -0.70053 |
| Q9H4L5_hSsNPNLTLDFGEEK_S3_S4_1              | Q9H4L5 | OSBP1L   | 26031 | oxysterol binding protein like associated 3                | 5303.S304       | 49.95;49.95         | hSsNPNLTLDFGEEK                 | 0.190718 | 0.180968 | 0.185711 | 0.078565 | 0.093493 | 0.136785 | 0.102948 | 0.185799 | 0.55408  | 0.050675 | 0.009412 | -0.85183 |
| Q9H4L7_kasiSYFK_S3_1                        | Q9H4L7 | SMARCAD1 | 56916 | SWI/SNF-related, matrix-associated actin-dependent reg 579 | 5198            | 99.95               | PSVPRKLSASIFYFK                 | 0.24465  | 0.267632 | 0.276765 | 0.070305 | 0.105688 | 0.109587 | 0.095193 | 0.263106 | 0.36193  | 0.17876  | 0.000437 | -1.46622 |
| Q9H4L7_kasiSYFK_S3_S5_1                     | Q9H4L7 | SMARCAD1 | 56916 | SWI/SNF-related, matrix-associated actin-dependent reg 579 | 5198            | 48.23;48.23         | PSVPRKLSASIFYFK                 | 0.260745 | 0.264909 | 0.266736 | 0.090212 | 0.097302 | 0.104365 | 0.097293 | 0.26413  | 0.368352 | 0.316845 | 3.03e-06 | -1.44084 |
| Q9H501_tLDSGTSSEIVKS_PR_S12_1               | Q9H501 | ESF1     | 51575 | ESF1 nucleolar pre-rRNA processing protein homolog         | 5198            |                     | GTSSEIVKS                       | 0.15725  | 0.207644 | 0.187339 | 0.099941 | 0.129663 | 0.103153 | 0.110919 | 0.180834 | 0.602655 | 0.58547  | 0.033663 | -0.73081 |
| Q9H582_hvYSPQAITSDK_S4_1                    | Q9H582 | ZNF644   | 84146 | zinc finger protein 644                                    | 51000           |                     | YSPQAITSDK                      | 0.167766 | 0.189477 | 0.183137 | 0.119135 | 0.127876 | 0.099951 | 0.115654 | 0.180126 | 0.642072 | 0.758404 | 0.003526 | -0.63919 |
| Q9H5J0_skPDPVPGPLLVGQPLGSPADR_S19_T21_1     | Q9H5J0 | ZBTB3    | 79842 | zinc finger and BTB domain containing 3                    | 5449.T551       | 50:50               | skPDPVPGPLLVGQPLGSPADR          | 0.130467 | 0.159431 | 0.164728 | 0.085439 | 0.106033 | 0.092781 | 0.094751 | 0.151542 | 0.625245 | 0.485192 | 0.002927 | -0.67751 |
| Q9H5J0_skPDPVPGPLLVGQPLGSPADR_T21_1         | Q9H5J0 | ZBTB3    | 79842 | zinc finger and BTB domain containing 3                    | T551            |                     | skPDPVPGPLLVGQPLGSPADR          | 0.156513 | 0.154138 | 0.17211  | 0.104406 | 0.13194  | 0.108516 | 0.114954 | 0.16092  | 0.714533 | 0.603445 | 0.001996 | -0.48529 |
| Q9H6F5_aGLGSPPERP_K5_1                      | Q9H6F5 | CDC8C6   | 79080 | coiled-coil domain containing 86                           | 547             |                     | aGLGSPPERP                      | 0.168595 | 0.165596 | 0.189869 | 0.089382 | 0.102669 | 0.088967 | 0.093673 | 0.174687 | 0.536233 | 0.515703 | 0.00796  | -0.89907 |
| Q9H6F5_aLVEFESNPEETREPSPVQV_S17_1           | Q9H6F5 | CDC8C6   | 79080 | coiled-coil domain containing 86                           | 547             |                     | aLVEFESNPEETREPSPVQV            | 0.192771 | 0.208985 | 0.200591 | 0.137639 | 0.14476  | 0.124132 | 0.13551  | 0.201782 | 0.617567 | 0.578907 | 0.001764 | -0.5744  |
| Q9H6F5_aLVEFESNPEETREPSPVQV_T12_S17_1       | Q9H6F5 | CDC8C6   | 79080 | coiled-coil domain containing 86                           | T42.S47         | 50:50               | aLVEFESNPEETREPSPVQV            | 0.195222 | 0.173405 | 0.184859 | 0.136621 | 0.116768 | 0.125077 | 0.126155 | 0.183495 | 0.687513 | 0.9499   | 0.009554 | -0.54054 |
| Q9H6F5_IQDQAGLESPOQPEPGAASQORQDHLHSPQR_S    | Q9H6F5 | CDC8C6   | 79080 | coiled-coil domain containing 86                           | 591             |                     | IQDQAGLESPOQPEPGAASQORQDHLHSPQR | 0.177798 | 0.243864 | 0.188752 | 0.128341 | 0.133511 | 0.121586 | 0.127813 | 0.203471 | 0.62816  | 0.055461 | 0.012178 | -0.7678  |
| Q9H6F5_qDHLHLESQORQPEYSPER_S8_1             | Q9H6F5 | CDC8C6   | 79080 | coiled-coil domain containing 86                           | 5102            |                     | qDHLHLESQORQPEYSPER             | 0.145615 | 0.163654 | 0.152275 | 0.09959  | 0.109348 | 0.06384  | 0.090926 | 0.153848 | 0.591014 | 0.253195 | 0.013184 | -0.67084 |
| Q9H6K1_vEGFNPFasPqK_S10_1                   | Q9H6K1 | ILRUN    | 64771 | inflammation and lipid regulator with UBA-like and NBR:    | 5215            |                     | vEGFNPFasPqK                    | 0.163866 | 0.113969 | 0.156272 | 0.080995 | 0.090296 | 0.098161 | 0.089817 | 0.144702 | 0.627073 | 0.185383 | 0.028094 | -0.68803 |
| Q9H7D7_rLQSDQEDVIR_S3_1                     | Q9H7D7 | WRD26    | 80232 | WD repeat domain 26                                        | 5121            |                     | rLQSDQEDVIR                     | 0.17495  | 0.205522 | 0.177151 | 0.122173 | 0.125053 | 0.142013 | 0.129746 | 0.185875 | 0.698031 | 0.566296 | 0.08081  | -0.51864 |
| Q9H7E2_rSsFGVNGEVEMLPK_S3_1                 | Q9H7E2 | TRDR3    | 81550 | tudor domain containing 3                                  | 5489            |                     | rSsFGVNGEVEMLPK                 | 0.258926 | 0.241363 | 0.162789 | 0.078028 | 0.101203 | 0.090889 | 0.09004  | 0.210236 | 0.407373 | 0.097844 | 0.011249 | -1.29558 |
| Q9H7M9_mDSNIOGIEPGFEASPPAIGPEAK_S3_1        | Q9H7M9 | VSIR     | 64115 | V-set immunoregulatory receptor                            | 5235            |                     | mDSNIOGIEPGFEASPPAIGPEAK        | 0.192771 | 0.185278 | 0.194168 | 0.113764 | 0.104086 | 0.090555 | 0.102802 | 0.190739 | 0.538965 | 0.287913 | 0.022629 | -0.89174 |
| Q9H8G2_rRSTDSVSSGSLQKETK_S3_T4_1            | Q9H8G2 | CAAP1    | 79886 | caspace activity and apoptosis inhibitor 1                 | 589.T90         | 49.99;49.99         | rRSTDSVSSGSLQKETK               | 0.240792 | 0.282665 | 0.269896 | 0.114089 | 0.112307 | 0.097146 | 0.107868 | 0.264451 | 0.407817 | 0.316783 | 0.00316  | -1.29401 |
| Q9H8G2_rRSTDSVSSGSLQKETK_S6_1               | Q9H8G2 | CAAP1    | 79886 | caspace activity and apoptosis inhibitor 1                 | 592             |                     | rRSTDSVSSGSLQKETK               | 0.299334 | 0.301562 | 0.27657  | 0.125848 | 0.116458 | 0.086643 | 0.109645 | 0.269914 | 0.407357 | 0.457528 | 0.002759 | -1.29563 |
| Q9H8G2_rRSTDSVSSGSLQKETK_S6_S7_1            | Q9H8G2 | CAAP1    | 79886 | caspace activity and apoptosis inhibitor 1                 | 592.S93         | 46.54;46.54         | rRSTDSVSSGSLQKETK               | 0.299611 | 0.230309 | 0.391084 | 0.156356 | 0.090917 | 0.159034 | 0.135436 | 0.307001 | 0.441157 | 0.372454 | 0.028265 | -1.18064 |
| Q9H8G2_rRSTDSVSSGSLQKETK_T4_1               | Q9H8G2 | CAAP1    | 79886 | caspace activity and apoptosis inhibitor 1                 | T90             |                     | rRSTDSVSSGSLQKETK               | 0.300614 | 0.239733 | 0.410573 | 0.152135 | 0.117563 | 0.127646 | 0.132448 | 0.327862 | 0.40531  | 0.082957 | 0.129121 | -1.3029  |
| Q9H8G2_rRSTDSVSSGSLQKETK_T4_S8_1            | Q9H8G2 | CAAP1    | 79886 | caspace activity and apoptosis inhibitor 1                 | T90.S94         | 40.64;40.64         | rRSTDSVSSGSLQKETK               | 0.254576 | 0.271781 | 0.230659 | 0.101561 | 0.085557 | 0.06413  | 0.083749 | 0.252339 | 0.331893 | 0.905325 | 0.002471 | -1.59121 |
| Q9H8G2_rSDSSVSSGSLQKETK_S1_1                | Q9H8G2 | CAAP1    | 79886 | caspace activity and apoptosis inhibitor 1                 | 589             |                     | rSDSSVSSGSLQKETK                | 0.245176 | 0.291947 | 0.296414 | 0.113625 | 0.139042 | 0.098716 | 0.117128 | 0.278658 | 0.698031 | 0.423076 | 0.001602 | -1.21201 |
| Q9H8G2_rSDSSVSSGSLQKETK_S1_T2_1             | Q9H8G2 | CAAP1    | 79886 | caspace activity and apoptosis inhibitor 1                 | 589.T90         | 46.68;46.68         | rSDSSVSSGSLQKETK                | 0.214508 | 0.235536 | 0.229757 | 0.133752 | 0.110956 | 0.113202 | 0.119303 | 0.2266   | 0.526491 | 0.85566  | 0.00063  | -0.92552 |
| Q9H8G2_rSDSSVSSGSLQKETK_S1_T2_S4_S5_1       | Q9H8G2 | CAAP1    | 79886 | caspace activity and apoptosis inhibitor 1                 | 589.T90.S92.S93 | 24.7;24.7;24.7;24.7 | rSDSSVSSGSLQKETK                | 0.265259 | 0.21243  | 0.18277  | 0.065208 | 0.104009 | 0.105859 | 0.091692 | 0.220053 | 0.416493 | 0.463668 | 0.091838 | -1.26363 |
| Q9H8G2_rSNEILGLESPEPNEK_S12_1               | Q9H8G2 | CAAP1    | 79886 | caspace activity and apoptosis inhibitor 1                 | 5112            |                     | rSNEILGLESPEPNEK                | 0.       |          |          |          |          |          |          |          |          |          |          |          |

|        |                                        |        |          |       |                                                         |                                           |                   |       |                   |          |          |          |          |          |          |          |          |          |          |          |          |
|--------|----------------------------------------|--------|----------|-------|---------------------------------------------------------|-------------------------------------------|-------------------|-------|-------------------|----------|----------|----------|----------|----------|----------|----------|----------|----------|----------|----------|----------|
| Q9NSKO | vAELLGSGRRTSQEGPGDsvk_S14_1            | Q9NSKO | KLC4     | 89953 | kinesin light chain 4                                   | 5519                                      |                   | 89.41 | ESDGRRTSQEGPGDSS  | 0.229684 | 0.198341 | 0.193376 | 0.114234 | 0.162376 | 0.150768 | 0.142459 | 0.207134 | 0.687765 | 0.760836 | 0.024679 | -0.54001 |
| Q9NT15 | mETVNSASSNSPSSGPR_S15_1                | Q9NT15 | PDS5B    | 23047 | PDS5 cohesin associated factor B                        | 51166                                     |                   | 91.16 | SSSSNPFSPGRIKGR   | 0.191215 | 0.183442 | 0.206546 | 0.135152 | 0.169788 | 0.123197 | 0.142712 | 0.193735 | 0.736639 | 0.381937 | 0.03036  | -0.44097 |
| Q9NUQ6 | ekkiisLEEPSK_55_1                      | Q9NUQ6 | SPATS2L  | 26010 | spermatogenesis associated serine rich 2 like           | 51365                                     |                   | 100   | IPREKKSIIILEEPPSK | 0.239314 | 0.185822 | 0.229242 | 0.117242 | 0.058213 | 0.109194 | 0.094889 | 0.218125 | 0.453202 | 0.882035 | 0.057616 | -1.20085 |
| Q9NUQ6 | gLSDGNPKPIHGTR_S2_1                    | Q9NUQ6 | SPATS2L  | 26010 | spermatogenesis associated serine rich 2 like           | 5159                                      |                   | 100   | RLLQKRLDLDGNPK    | 0.201655 | 0.15618  | 0.269898 | 0.118151 | 0.102131 | 0.082848 | 0.101044 | 0.209244 | 0.482898 | 0.174138 | 0.035238 | -1.05021 |
| Q9NUQ6 | gHAADTSERFFRFGVGR_S15_1                | Q9NUQ6 | SPATS2L  | 26010 | spermatogenesis associated serine rich 2 like           | 5526                                      |                   | 99.99 | E9F3369           | 0.218577 | 0.193369 | 0.224811 | 0.122805 | 0.106038 | 0.114222 | 0.114355 | 0.212952 | 0.53877  | 0.046637 | 0.0081   | -0.89226 |
| Q9NV70 | TGTS7SLNKR_T5_S6_S7_1                  | Q9NV70 | EXOC1    | 55763 | exocyst complex component 1                             | 7471.5472.5473                            | 33.38;33.38;33.28 |       | SGKTKSSSSLNKLS_V  | 0.216899 | 0.183073 | 0.200258 | 0.121996 | 0.136666 | 0.109209 | 0.122622 | 0.200077 | 0.612874 | 0.794843 | 0.006331 | -0.70634 |
| Q9NV75 | TSPNSLNLR_Y4_S5_1                      | Q9NV75 | PGCH2H   | 55105 | G-patch domain containing 2                             | 5129.5130                                 | 50:50             |       | LVAKRFRSSLNLRNV_V | 0.28321  | 0.2244   | 0.174965 | 0.147763 | 0.13468  | 0.08168  | 0.121374 | 0.227255 | 0.534356 | 0.885557 | 0.403566 | -0.90656 |
| Q9NW08 | cRQVNSVIELGNSCDEPEEAPPVPVK_S9_1        | Q9NW08 | PAG1     | 55824 | phosphoprotein membrane anchor with glycosphingolip     | 5244                                      |                   | 84.36 | EEETNSVIELGNSCD   | 0.152065 | 0.157371 | 0.157575 | 0.065196 | 0.04501  | 0.071713 | 0.06407  | 0.155671 | 0.388449 | 0.092226 | 0.00345  | -1.3642  |
| Q9NW08 | sREDPTTEEIASMYSSVKNPKGLVMK_Y17_1       | Q9NW08 | PAG1     | 55824 | phosphoprotein membrane anchor with glycosphingolip     | 5347                                      |                   | 79.73 | BEETSAMYSSVKNPKG  | 0.211451 | 0.222279 | 0.186514 | 0.145623 | 0.135197 | 0.148935 | 0.143252 | 0.206748 | 0.692881 | 0.02122  | 0.050041 | -0.52942 |
| Q9NXD2 | rNSILKPKPDQAQTDQSDNSDEQYFR_S3_1        | Q9NXD2 | MTMR10   | 54893 | myotubularin related protein 10                         | 5607                                      |                   | 100   | ELLFRNRNLLKPKPD   | 0.191332 | 0.220295 | 0.193842 | 0.091997 | 0.136779 | 0.068086 | 0.098954 | 0.201823 | 0.490301 | 0.349492 | 0.099722 | -1.02826 |
| Q9NXH8 | sRLVLPETSR_S1_1                        | Q9NXH8 | TOR4A    | 54863 | torsin family 4 member A                                | 597                                       |                   | 100   | PRKRRGSRVLPETSR   | 0.211824 | 0.193554 | 0.15958  | 0.105122 | 0.114449 | 0.0804   | 0.09999  | 0.188319 | 0.530962 | 0.611513 | 0.008598 | -0.91332 |
| Q9NXV6 | gIsSNEGVEEFSK_S3_1                     | Q9NXV6 | CDKN2AIP | 55602 | CDKN2A interacting protein                              | 5131                                      |                   | 98.29 | KVKKRGISSENEGVE   | 0.200916 | 0.22501  | 0.19873  | 0.132445 | 0.144536 | 0.143399 | 0.140127 | 0.208219 | 0.627978 | 0.346589 | 0.01822  | -0.57137 |
| Q9NXV6 | rVIEGKNSAVEQDPAK_S8_1                  | Q9NXV6 | CDKN2AIP | 55602 | CDKN2A interacting protein                              | 5151                                      |                   | 87.34 | RVIEGKNSAVEQDPA   | 0.140353 | 0.149761 | 0.159336 | 0.083114 | 0.092973 | 0.095322 | 0.094017 | 0.149817 | 0.603868 | 0.635475 | 0.008864 | -0.72769 |
| Q9NXV6 | rVIEGKNSAVEQDPAK_S9_1                  | Q9NXV6 | CDKN2AIP | 55602 | CDKN2A interacting protein                              | 5152                                      |                   | 91.4  | VIEGKNSAVEQDPAK   | 0.151249 | 0.190348 | 0.185106 | 0.067625 | 0.088326 | 0.082731 | 0.079561 | 0.175567 | 0.453163 | 0.405853 | 0.002198 | -1.1419  |
| Q9NYB0 | YLGDAPVSPSSQK_S12_1                    | Q9NYB0 | TERF2IP  | 54386 | TERF2 interacting protein                               | 5206                                      |                   | 99.1  | DAPVSPSSQKLRKKA   | 0.133878 | 0.156695 | 0.124833 | 0.085303 | 0.100553 | 0.109916 | 0.098591 | 0.138469 | 0.712008 | 0.728093 | 0.028448 | -0.49003 |
| Q9NYB0 | YLGDAPVSPSSQK_S9_1                     | Q9NYB0 | TERF2IP  | 54386 | TERF2 interacting protein                               | 5203                                      |                   | 99.92 | LLGDAPVSPSSQKRL   | 0.174549 | 0.165575 | 0.179064 | 0.134306 | 0.10345  | 0.134307 | 0.124021 | 0.173063 | 0.716625 | 0.258665 | 0.011256 | -0.48071 |
| Q9NYF3 | IRP5LDFDK_S4_1                         | Q9NYF3 | FAM53C   | 51307 | family with sequence similarity 53 member C             | 5299                                      |                   | 100   | DRRRLSIFPVDLDR    | 0.217095 | 0.221826 | 0.196134 | 0.113477 | 0.149789 | 0.10184  | 0.121702 | 0.201165 | 0.57492  | 0.460244 | 0.005442 | -0.79875 |
| Q9NYF3 | sLSPVDLSR_S3_1                         | Q9NYF3 | FAM53C   | 51307 | family with sequence similarity 53 member C             | 5122                                      |                   | 100   | KRRCRLSIFPVDLSR   | 0.189619 | 0.198327 | 0.215514 | 0.095374 | 0.115349 | 0.108279 | 0.106334 | 0.211653 | 0.528621 | 0.742803 | 0.000588 | -0.91969 |
| Q9NYF8 | sSATSDIWPGLsAYDNSPR_S13_Y15_1          | Q9NYF8 | BCLAF1   | 9774  | BCL2 associated transcription factor 1                  | 5217.Y219                                 | 49.61;49.61       |       | GIWFGFLSAYDNSPR   | 0.195251 | 0.192284 | 0.172342 | 0.076904 | 0.119256 | 0.0948   | 0.096987 | 0.181382 | 0.534708 | 0.368264 | 0.003421 | -0.90381 |
| Q9NYF8 | ysPQSNPIHHIISR_S7_1                    | Q9NYF8 | BCLAF1   | 9774  | BCL2 associated transcription factor 1                  | 5290                                      |                   | 78.21 | VYSPQSNPIHHIISR   | 0.12773  | 0.184758 | 0.203683 | 0.077764 | 0.115361 | 0.055854 | 0.082993 | 0.171723 | 0.483296 | 0.743147 | 0.035777 | -1.04902 |
| Q9NYF8 | ysPQSNPIHHIISR_Y1_S7_2                 | Q9NYF8 | BCLAF1   | 9774  | BCL2 associated transcription factor 1                  | Y284.S290                                 | 94.69;100         |       | RGSGSRYSFQSNPS    | 0.173613 | 0.192505 | 0.202979 | 0.098346 | 0.08901  | 0.044326 | 0.077227 | 0.235302 | 0.328205 | 0.183001 | 0.045542 | -1.60733 |
| Q9NYF8 | ysPQSNPIHHIISR_Y1_S7_2                 | Q9NYF8 | BCLAF1   | 9774  | BCL2 associated transcription factor 1                  | Y284.S290                                 | 86.96;99.92       |       | YSGGSRYSFQSNPS    | 0.16127  | 0.178153 | 0.1866   | 0.133166 | 0.130137 | 0.06483  | 0.109378 | 0.175341 | 0.623799 | 0.200768 | 0.484477 | -0.68085 |
| Q9NYJ8 | aiGNNSATPR_S9_1                        | Q9NYJ8 | TAB2     | 23118 | TGF-beta activated kinase 1/MAP3K7 binding protein 2    | 5450                                      |                   | 98.87 | IGNNSATPRVQVSP    | 0.157471 | 0.195602 | 0.236902 | 0.116017 | 0.144317 | 0.15963  | 0.139888 | 0.206259 | 0.690758 | 0.665908 | 0.047036 | -0.53375 |
| Q9NYJ8 | kIsmsGDDAAYTQALLVHKQ_S3_1              | Q9NYJ8 | TAB2     | 23118 | TGF-beta activated kinase 1/MAP3K7 binding protein 2    | 5524                                      |                   | 98.79 | ISETRKLMSGSDDA    | 0.191701 | 0.223416 | 0.191559 | 0.119627 | 0.129891 | 0.110453 | 0.11999  | 0.202226 | 0.593349 | 0.438426 | 0.002367 | -0.75305 |
| Q9NYJ8 | kIsmsGDDAAYTQALLVHKQ_S3_S6_1           | Q9NYJ8 | TAB2     | 23118 | TGF-beta activated kinase 1/MAP3K7 binding protein 2    | 5524.S527                                 | 50:50             |       | ISETRKLMSGSDDA    | 0.183162 | 0.24235  | 0.190258 | 0.093811 | 0.121916 | 0.098129 | 0.104619 | 0.215527 | 0.509698 | 0.359714 | 0.008135 | -0.97229 |
| Q9NYL2 | nIsSQPSLEEMQQLR_S3_1                   | Q9NYL2 | TAB2     | 23118 | TGF-beta activated kinase 1/MAP3K7 binding protein 2    | 5582                                      |                   | 89.61 | RRLKRNSISQPSLE    | 0.17198  | 0.266223 | 0.260448 | 0.082955 | 0.156351 | 0.090149 | 0.109818 | 0.232884 | 0.471558 | 0.739486 | 0.032789 | -1.08449 |
| Q9NYL2 | nIsLHNSR_S3_1                          | Q9NYL2 | MAP3K20  | 56486 | mitogen-activated protein kinase kinase kinase 20       | 5648                                      |                   | 94.97 | ISETRKLMSGSDDA    | 0.259286 | 0.212836 | 0.284483 | 0.108536 | 0.102369 | 0.148067 | 0.119657 | 0.252201 | 0.617445 | 0.659271 | 0.003637 | -1.07567 |
| Q9NYV4 | ehkPQQQYK_T3_1                         | Q9NYV4 | CDK12    | 51755 | cyclin dependent kinase 12                              | 86472                                     |                   | 100   | SPEPKAIFPQQYK     | 0.186865 | 0.185915 | 0.162214 | 0.099849 | 0.148877 | 0.119066 | 0.122598 | 0.178331 | 0.687471 | 0.484393 | 0.023735 | -0.54063 |
| Q9NYV4 | ehkPQVPLFR_S5_1                        | Q9NYV4 | CDK12    | 51755 | cyclin dependent kinase 12                              | 5423                                      |                   | 100   | DEKESKSPVPLFR     | 0.15555  | 0.223253 | 0.185288 | 0.088188 | 0.129842 | 0.098248 | 0.105426 | 0.18033  | 0.560687 | 0.581796 | 0.027291 | -0.83473 |
| Q9NYV4 | rPTMPEQEAAsPHILPPEK_T2_1               | Q9NYV4 | CDK12    | 51755 | cyclin dependent kinase 12                              | T1244                                     |                   | 90.15 | DPGPRRTPTMPEQE    | 0.160105 | 0.179842 | 0.203548 | 0.1278   | 0.14301  | 0.095475 | 0.122095 | 0.181765 | 0.671719 | 0.932246 | 0.038404 | -0.57407 |
| Q9NYZ3 | IVDVSPOGSGPSRVPQALNPSPEESDSTFK_S10_S1  | Q9NYZ3 | GTS1E    | 51512 | G2 and S-phase expressed 1                              | 5580.S583                                 | 49.64;49.64       |       | GVSPDRGSGPSRVP    | 0.179521 | 0.181084 | 0.222916 | 0.135796 | 0.146461 | 0.121664 | 0.134034 | 0.197855 | 0.677435 | 0.430266 | 0.011544 | -0.56185 |
| Q9NZB2 | nLTQNSYSNIPHGG_K_1                     | Q9NZB2 | FAM120A  | 23196 | family with sequence similarity 120A                    | T413                                      |                   | 99.9  | DSGKNLTEQNSYSN    | 0.184196 | 0.203381 | 0.153142 | 0.124133 | 0.145753 | 0.131258 | 0.133715 | 0.18024  | 0.741872 | 0.317711 | 0.043452 | -0.43076 |
| Q9NZB2 | nOAAIQGGPPYAsAEEVAK_S14_1              | Q9NZB2 | FAM120A  | 23196 | family with sequence similarity 120A                    | 51023                                     |                   | 99.82 | RFPYAsAEEVAK      | 0.201285 | 0.19563  | 0.208993 | 0.12849  | 0.154402 | 0.144042 | 0.142312 | 0.203136 | 0.705085 | 0.397818 | 0.026206 | -0.50413 |
| Q9NZJ0 | cNPSNSPSSAAcAPScAGDPLPNSPTPFSK_S6_S7_1 | Q9NZJ0 | DCL      | 51514 | denticleless E3 ubiquitin protein ligase homolog        | 5443.S444.5446.S4_24.86;24.86;24.86;24.86 |                   | 99.24 | AKCPSTPSPSSAAc    | 0.188407 | 0.177366 | 0.194453 | 0.114294 | 0.141694 | 0.156204 | 0.137397 | 0.187742 | 0.73184  | 0.365233 | 0.207518 | -0.4504  |
| Q9NZJ4 | dSAPSTPTsPTEFLTPLGR_S9_1               | Q9NZJ4 | SATC     | 26278 | sacsin molecular chaperone                              | 54264                                     |                   | 99.24 | SCPTPTsPTEFLTLP   | 0.259286 | 0.178726 | 0.244006 | 0.120297 | 0.179062 | 0.139186 | 0.147392 | 0.222226 | 0.692889 | 0.890955 | 0.031254 | -0.5793  |
| Q9NZJ4 | YAsNVcFTTGLTEFGQK_Y1_1                 | Q9NZJ4 | SACS     | 26278 | sacsin molecular chaperone                              | Y2509                                     |                   | 92.88 | RKHALRYASNVcFT    | 0.250001 | 0.298204 | 0.29894  | 0.050822 | 0.105241 | 0.099887 | 0.105317 | 0.282382 | 0.302132 | 0.932966 | 0.01144  | -1.72675 |
| Q9NZM3 | tvsPgsVSPHGGQGVENLK_S8_1               | Q9NZM3 | ITSN2    | 50618 | intersectin 2                                           | 5884                                      |                   | 98.43 | RKALRYASNVcFT     | 0.169847 | 0.262655 | 0.199953 | 0.113665 | 0.138363 | 0.108203 | 0.082077 | 0.120181 | 0.569575 | 0.206837 | 0.034737 | -0.81204 |
| Q9NZM3 | tvsPgsVSPHGGQGVENLK_S8_1               | Q9NZM3 | ITSN2    | 50618 | intersectin 2                                           | 5884                                      |                   | 68.99 | TvsPgsVSPHGGQ     | 0.192686 | 0.25018  | 0.193031 | 0.121358 | 0.163861 | 0.107524 | 0.130914 | 0.211055 | 0.620284 | 0.875058 | 0.036395 | -0.689   |
| Q9NZM4 | gSGPAPLPAKVDATSGUR_S3_1                | Q9NZM4 | BICRA    | 29998 | BRD4 interacting chromatin remodeling complex associa   | 51413                                     |                   | 100   | AGRARSGPAPLPAK    | 0.279356 | 0.187945 | 0.24553  | 0.121405 | 0.160653 | 0.135506 | 0.139188 | 0.23675  | 0.585784 | 0.312311 | 0.027375 | -0.77156 |
| Q9NZZ3 | dNLAAQGSFNmQANVTQSUK_S7_1              | Q9NZZ3 | CHMP5    | 51510 | charged multivesicular body protein 5                   | 586                                       |                   | 100   | RNLAAQGSFNmQAN    | 0.157359 | 0.203871 | 0.183131 | 0.081872 | 0.137804 | 0.071708 | 0.097128 | 0.181403 | 0.535278 | 0.600058 | 0.026454 | -0.90164 |
| Q9NZZ3 | dNLAAQGSFNmQANVTQSUK_S7_1              | Q9NZZ3 | CHMP5    | 51510 | charged multivesicular body protein 5                   | 5886                                      |                   | 100   | RNLAAQGSFNmQAN    | 0.166794 | 0.200804 | 0.175492 | 0.108602 | 0.120982 | 0.0981   | 0.099228 | 0.18105  | 0.60337  | 0.951776 | 0.061154 | -0.72889 |
| Q9P013 | qYSRSDPSHTK_Y2_S3_S4_1                 | Q9P013 | CWC15    | 51503 | CWC15 spliceosome associated protein homolog            | Y30.S31.S32                               | 33.33;33.33;33.33 |       | LSQSKQYSRSDPSHT   | 0.342174 | 0.363986 | 0.17142  | 0.066212 | 0.104876 | 0.077    | 0.082696 | 0.295227 | 0.282896 | 0.069123 | 0.027618 | -1.82627 |
| Q9P0L0 | qDGPMPKPhsVSLNDETR_S10_1               | Q9P0L0 | VAPA     | 9218  | VAMP associated protein A                               | 5164                                      |                   | 98.77 | QLSMPKPhsVSLNDE   | 0.170471 | 0.171614 | 0.224162 | 0.128791 | 0.141801 | 0.141732 | 0.137441 | 0.189491 | 0.7236   | 0.11993  | 0.04408  | -0.46674 |
| Q9P0L0 | vAHSKDGSTASFR_S9_S11_1                 | Q9P0L0 | VAPA     | 9218  | VAMP associated protein A                               | S214.S216                                 | 45.48;45.48       |       | AHSKDGSTASFR      | 0.255233 | 0.26201  | 0.26657  | 0.166044 | 0.156579 | 0.109357 | 0.143993 | 0.261701 | 0.55022  | 0.054312 | 0.02695  | -0.86192 |
| Q9P1Y5 | apSPGMSRSLR_PGRS_S3_1                  | Q9P1Y5 | CAMSAP3  | 57662 | calmodulin regulated spectrin associated protein family | 51074                                     |                   | 82.98 | RFTSPGMSRSLR      | 0.201561 | 0.282736 | 0.160891 | 0.117852 | 0.14945  | 0.12243  | 0.129911 | 0.197063 | 0.659236 | 0.400016 | 0.03165  | -0.60113 |
| Q9P1Y6 | eAsPAPAQEGPREDLPTSR_S3_1               | Q9P1Y6 | PHRF1    | 57661 | PHD and ring finger domains 1                           | 51202                                     |                   | 99.96 | KGAVREASPAPAQEG   | 0.23462  | 0.202423 | 0.225345 | 0.075561 | 0.107289 | 0.093395 | 0.092082 | 0.220796 | 0.417045 | 0.958836 | 0.006631 | -1.26173 |
| Q9P1Y6 | eAsPAPAQEGPREDLPTSR_PALGAEHVSPPEVATD   |        |          |       |                                                         |                                           |                   |       |                   |          |          |          |          |          |          |          |          |          |          |          |          |

|                                             |        |           |                                                            |                   |       |                  |                         |          |          |          |          |          |          |          |          |          |           |          |
|---------------------------------------------|--------|-----------|------------------------------------------------------------|-------------------|-------|------------------|-------------------------|----------|----------|----------|----------|----------|----------|----------|----------|----------|-----------|----------|
| Q9UHF7_gSPSYQASGLGLTVPVSTGTEQTK_S2_1        | Q9UHF7 | TRPS1     | 7227 transcriptional repressor GATA binding 1              | 5803              | 98.41 | GADILRGSFSYVQAS  | 0.153578                | 0.181494 | 0.210163 | 0.043594 | 0.083506 | 0.063115 | 0.063405 | 0.181745 | 0.348868 | 0.664488 | 0.004078  | -1.51925 |
| Q9UHF7_mQPLHIQIKSQQEOSTGDDPNSSVYEGK_S10_1   | Q9UHF7 | TRPS1     | 7227 transcriptional repressor GATA binding 1              | 51041             | 85.01 | GLVCIKTKSQPQSTAD | 0.145797                | 0.176883 | 0.178207 | 0.111067 | 0.113915 | 0.095317 | 0.106766 | 0.166962 | 0.639465 | 0.459486 | 0.00755   | -6.64506 |
| Q9UHF7_nmLAFSPAAGVGCPELkSPQR_S19_1          | Q9UHF7 | TRPS1     | 7227 transcriptional repressor GATA binding 1              | 5127              | 100   | GCEPFLKSPQRAEAD  | 0.168765                | 0.151835 | 0.232313 | 0.076625 | 0.093566 | 0.092604 | 0.087597 | 0.184035 | 0.475282 | 0.905732 | 0.018269  | -1.07315 |
| Q9UHF7_rRGsGVCAncLITk_S4_1                  | Q9UHF7 | TRPS1     | 7227 transcriptional repressor GATA binding 1              | 5892              | 100   | LLRRRRRSQGVFCANV | 0.182898                | 0.190249 | 0.165226 | 0.152181 | 0.117345 | 0.122626 | 0.130717 | 0.190469 | 0.728357 | 0.637479 | 0.020616  | -0.45728 |
| Q9UHF6_nNsVSGLVk_S3_1                       | Q9UHF6 | DDX20     | 11218 DEAD-box helicase 20                                 | 5500              | 99.29 | MALRRRRNLDKVSVC  | 0.210384                | 0.200297 | 0.189223 | 0.154738 | 0.151865 | 0.133785 | 0.146796 | 0.200601 | 0.737977 | 0.924735 | 0.004007  | -0.44619 |
| Q9UHR6_gAGPQLLEEDNAPGSDAAELEAPARPDPVSk_T21  | Q9UHR6 | ZNHIT2    | 741 zinc finger HIT-type containing 2                      | T161              | 99.77 | LELAPATFDSVSKVD  | 0.200327                | 0.153832 | 0.185956 | 0.122207 | 0.141093 | 0.109259 | 0.124186 | 0.180038 | 0.689777 | 0.62282  | 0.027989  | -0.5358  |
| Q9UHR8_rkMEENTsINLk_S8_1                    | Q9UHR8 | BAZ2A     | 29919 bromodomain adjacent to zinc finger domain 2B        | S2043             | 99.25 | KLMEENTsINLk_S8  | 0.175824                | 0.151555 | 0.177848 | 0.113926 | 0.099565 | 0.115917 | 0.109803 | 0.160409 | 0.652504 | 0.542154 | 0.000769  | -0.61705 |
| Q9UFI9_rksGSLNFSFSGDGR_S3_1                 | Q9UFI9 | BAZ2A     | 11177 bromodomain adjacent to zinc finger domain 2A        | S1747             | 90.22 | KRGKPKRSVGLSINFS | 0.228166                | 0.225343 | 0.215449 | 0.127893 | 0.115446 | 0.127934 | 0.123762 | 0.222986 | 0.555024 | 0.926209 | 0.624E-05 | -0.84938 |
| Q9UFI2_rRSISGTStSEKPNsMDTANTSPFK_S3_1       | Q9UFI2 | RASAL2    | 9462 RAS protein activator like 2                          | S16               | 100   | RASAL2           | 0.216746                | 0.243386 | 0.196313 | 0.124911 | 0.148086 | 0.124149 | 0.132382 | 0.218815 | 0.604995 | 0.498749 | 0.030406  | -0.725   |
| Q9UFI2_rRSISGTStSEKPNsMDTANTSPFK_S3_S5_1    | Q9UFI2 | RASAL2    | 9462 RAS protein activator like 2                          | S16.S18           |       |                  | 0.161913                | 0.209844 | 0.158379 | 0.10674  | 0.137556 | 0.102276 | 0.115524 | 0.176712 | 0.653743 | 0.617398 | 0.03768   | -0.6132  |
| Q9UFI2_sISGTStSEKPNsMDTANTSPFK_S1_1         | Q9UFI2 | RASAL2    | 9462 RAS protein activator like 2                          | S16               | 83.19 | ERSPRRSISGTStSEK | 0.176833                | 0.252422 | 0.210937 | 0.078777 | 0.105422 | 0.07718  | 0.087126 | 0.213397 | 0.408282 | 0.298794 | 0.005971  | -1.29236 |
| Q9UFI2_sISGTStSEKPNsMDTANTSPFK_S3_1         | Q9UFI2 | RASAL2    | 9462 RAS protein activator like 2                          | S18               | 61.31 | SPRRRSISGTStSEK  | 0.175984                | 0.210877 | 0.227211 | 0.059278 | 0.092159 | 0.070187 | 0.073875 | 0.204691 | 0.360909 | 0.581156 | 0.001879  | -1.47029 |
| Q9UFI2_sISGTStSEKPNsMDTANTSPFK_S3_S8_1      | Q9UFI2 | RASAL2    | 9462 RAS protein activator like 2                          | S18.S23           |       |                  | 0.576.5578              | 0.258129 | 0.190069 | 0.110235 | 0.087706 | 0.096003 | 0.245437 | 0.391153 | 0.448441 | 0.000585 | -1.3542   |          |
| Q9UJI6_amStSISSPQPGk_S3_1                   | Q9UJI6 | DBNL      | 28997 drebrin like                                         | S269              | 92.94 | KQKERAMSTTSSISP  | 0.255895                | 0.259609 | 0.180498 | 0.037766 | 0.055537 | 0.051563 | 0.048289 | 0.232001 | 0.20814  | 0.083652 | 0.002219  | -2.62437 |
| Q9UJI6_amStSISSPQPGk_S3_T4_T5_1             | Q9UJI6 | DBNL      | 28998 drebrin like                                         | S269.T270.T271    |       |                  | 32.75;32.75;32.75       |          |          |          |          |          |          |          |          |          |           |          |
| Q9UJI6_amStSISSPQPGk_S3_T4_T5_S6_1          | Q9UJI6 | DBNL      | 28999 drebrin like                                         | S269.T270.T271.S2 |       |                  | 24.96;24.96;24.96;24.96 |          |          |          |          |          |          |          |          |          |           |          |
| Q9UJI6_amStSISSPQPGk_S6_1                   | Q9UJI6 | DBNL      | 29000 drebrin like                                         | S272              |       |                  |                         |          |          |          |          |          |          |          |          |          |           |          |
| Q9UJI6_amStSISSPQPGk_T4_1                   | Q9UJI6 | DBNL      | 29001 drebrin like                                         | T270              |       |                  |                         |          |          |          |          |          |          |          |          |          |           |          |
| Q9UJI6_eRAMsTSSISPPQPGk_S5_T6_1             | Q9UJI6 | DBNL      | 29002 drebrin like                                         | T270.T270         |       |                  | 47.95;47.95             |          |          |          |          |          |          |          |          |          |           |          |
| Q9UJI6_qLQDPETHFRG_T3_1                     | Q9UJI6 | DBNL      | 29003 drebrin like                                         | T291              |       |                  |                         |          |          |          |          |          |          |          |          |          |           |          |
| Q9UJI6_qLQDPETHFRGPREAAISRPR_T3_1           | Q9UJI6 | DBNL      | 29004 drebrin like                                         | T291              |       |                  |                         |          |          |          |          |          |          |          |          |          |           |          |
| Q9UJI6_qLQDPETHFRGPREAAISRPR_T7_1           | Q9UJI6 | DBNL      | 29005 drebrin like                                         | T295              |       |                  |                         |          |          |          |          |          |          |          |          |          |           |          |
| Q9UJX2_nGEGTPTTEVPAPFLPASLANNTPRR_S19_S21_T | Q9UJX2 | CDC23     | 8697 cell division cycle 23                                | S576.S578.T582.T5 |       |                  | 24.99;24.99;24.99;24.99 |          |          |          |          |          |          |          |          |          |           |          |
| Q9UJX5_ikEEVLSSEAEQKQGAALAAPEVIK_S7_1       | Q9UJX5 | ANAPC4    | 29945 anaphase promoting complex subunit 4                 | S777              |       |                  |                         |          |          |          |          |          |          |          |          |          |           |          |
| Q9UJX5_ikEEVLSSEAEQKQGAALAAPEVIK_S7_S9_1    | Q9UJX5 | ANAPC4    | 29945 anaphase promoting complex subunit 4                 | S777.S779         |       |                  | 50;50                   |          |          |          |          |          |          |          |          |          |           |          |
| Q9UK58_aEKkSPINvK_S5_1                      | Q9UK58 | CCNL1     | 57018 cyclin L1                                            | S432              |       |                  |                         |          |          |          |          |          |          |          |          |          |           |          |
| Q9UK61_kNTQIQLSSPDVQNSLLEDK_S10_1           | Q9UK61 | TASOR     | 23272 transcription activation suppressor                  | S1552             |       |                  |                         |          |          |          |          |          |          |          |          |          |           |          |
| Q9UK61_kNTQIQLSSPDVQNSLLEDKTYLDESR_S10_1    | Q9UK61 | TASOR     | 23272 transcription activation suppressor                  | S1552             |       |                  |                         |          |          |          |          |          |          |          |          |          |           |          |
| Q9UK61_sDYQVFPSPFTDTLk_S8_1                 | Q9UK61 | TASOR     | 23272 transcription activation suppressor                  | S978              |       |                  |                         |          |          |          |          |          |          |          |          |          |           |          |
| Q9UKA4_sVSPFTLNPnSDENLk_S3_T5_1             | Q9UKA4 | AKAP11    | 11215 A-kinase anchoring protein 11                        | S1242.T1244       |       |                  | 49.9;49.9               |          |          |          |          |          |          |          |          |          |           |          |
| Q9UKA4_sVSPFTLNPnSDENLk_T5_1                | Q9UKA4 | AKAP11    | 11215 A-kinase anchoring protein 11                        | T1244             |       |                  |                         |          |          |          |          |          |          |          |          |          |           |          |
| Q9UKA4_sVcPESvTDEYAGHLIQLK_S3_S6_T8_1       | Q9UKA4 | AKAP11    | 11215 A-kinase anchoring protein 11                        | S1337.S1340.T134  |       |                  | 31.05;31.05;31.05       |          |          |          |          |          |          |          |          |          |           |          |
| Q9UKJ3_gPKPEPAGSPPAPP_S11_1                 | Q9UKJ3 | GPATCH8   | 5740 G-patch domain containing 8                           | S740              |       |                  |                         |          |          |          |          |          |          |          |          |          |           |          |
| Q9UKV3_sLVALPEQIASEEETPLPPLk_S12_1          | Q9UKV3 | ACIN1     | 22985 Apoptotic chromatin condensation inducer 1           | S410              |       |                  |                         |          |          |          |          |          |          |          |          |          |           |          |
| Q9UKV3_kAsLVALPEQIASEEETPLPPLk_S12_1        | Q9UKV3 | ACIN1     | 22985 Apoptotic chromatin condensation inducer 1           | S400              |       |                  |                         |          |          |          |          |          |          |          |          |          |           |          |
| Q9UKV3_kisVSAVtK_S3_1                       | Q9UKV3 | ACIN1     | 22985 Apoptotic chromatin condensation inducer 1           | S825              |       |                  |                         |          |          |          |          |          |          |          |          |          |           |          |
| Q9UKV3_kPisSITTESLk_S3_1                    | Q9UKV3 | ACIN1     | 22985 Apoptotic chromatin condensation inducer 1           | S863              |       |                  |                         |          |          |          |          |          |          |          |          |          |           |          |
| Q9UKV3_rAsHTLPSHR_S3_1                      | Q9UKV3 | ACIN1     | 22985 Apoptotic chromatin condensation inducer 1           | S561              |       |                  |                         |          |          |          |          |          |          |          |          |          |           |          |
| Q9UKV3_rAsHTLPSHR_S3_T5_1                   | Q9UKV3 | ACIN1     | 22985 Apoptotic chromatin condensation inducer 1           | S561.S563         |       |                  | 50;50                   |          |          |          |          |          |          |          |          |          |           |          |
| Q9UKX7_nSESEMKAAETQsPSLFGSTk_S15_1          | Q9UKX7 | NUP50     | 10762 nucleoporin 50                                       | S221              |       |                  |                         |          |          |          |          |          |          |          |          |          |           |          |
| Q9UKX7_vAAETQPSLFGSTk_S7_1                  | Q9UKX7 | NUP50     | 10762 nucleoporin 50                                       | S221              |       |                  |                         |          |          |          |          |          |          |          |          |          |           |          |
| Q9UKX7_vAAETQPSLFGSTk_T5_1                  | Q9UKX7 | NUP50     | 10762 nucleoporin 50                                       | T219              |       |                  |                         |          |          |          |          |          |          |          |          |          |           |          |
| Q9UL54_aGkLKDQVDAFLFDQPEK_S3_1              | Q9UL54 | TAOK2     | 9344 TAO kinase 2                                          | S9                |       |                  |                         |          |          |          |          |          |          |          |          |          |           |          |
| Q9ULH0_aYLNRRPSTVTLLNNSAPANR_S9_1           | Q9ULH0 | KIDINS220 | 57498 kinase D-interacting substrate 220kDa                | S1681             |       |                  |                         |          |          |          |          |          |          |          |          |          |           |          |
| Q9ULH0_hNSLWkSQTR_T10_1                     | Q9ULH0 | KIDINS220 | 57498 kinase D-interacting substrate 220kDa                | T1354             |       |                  |                         |          |          |          |          |          |          |          |          |          |           |          |
| Q9ULH0_gMsFDLTK_S3_1                        | Q9ULH0 | KIDINS220 | 57498 kinase D-interacting substrate 220kDa                | S1359             |       |                  |                         |          |          |          |          |          |          |          |          |          |           |          |
| Q9ULH0_rTSPNLSQSDSIEISk_S4_1                | Q9ULH0 | KIDINS220 | 57498 kinase D-interacting substrate 220kDa                | S1359             |       |                  |                         |          |          |          |          |          |          |          |          |          |           |          |
| Q9ULH0_rPsvTLLNNSAPANR_S3_T4_1              | Q9ULH0 | KIDINS220 | 57498 kinase D-interacting substrate 220kDa                | S1681.T1682       |       |                  | 48.5;48.5               |          |          |          |          |          |          |          |          |          |           |          |
| Q9ULH0_vPkPEHSAEIPR_S4_S8_1                 | Q9ULH0 | KIDINS220 | 57498 kinase D-interacting substrate 220kDa                | S1555.S1559       |       |                  | 50;50                   |          |          |          |          |          |          |          |          |          |           |          |
| Q9ULH1_qASEDNDLTPETPLPVR_S6_1               | Q9ULH1 | ASAP1     | 50807 ArfGAP with SH3 domain, ankyrin repeat and PH domain | S1044             |       |                  |                         |          |          |          |          |          |          |          |          |          |           |          |
| Q9ULL5_aSAGAGGAGGQAYSPGQGLGPQAYGQGGGQ_Q     | Q9ULL5 | PRR12     | 57479 proline rich 12                                      | S404              |       |                  |                         |          |          |          |          |          |          |          |          |          |           |          |
| Q9ULL5_gDGSELLAGGPPAERTEDEFIUHLQAPsPPR_S    | Q9ULL5 | PRR12     | 57479 proline rich 12                                      | S651              |       |                  |                         |          |          |          |          |          |          |          |          |          |           |          |
| Q9ULL5_rDEDFILHLLQAPsPPR_S16_1              | Q9ULL5 | PRR12     | 57479 proline rich 12                                      | S651              |       |                  |                         |          |          |          |          |          |          |          |          |          |           |          |
| Q9ULW0_rRMPEKEEDEDVPIV_S6_1                 | Q9ULW0 | TPX2      | 22974 TPX2, microtubule nucleation factor                  | T499              |       |                  |                         |          |          |          |          |          |          |          |          |          |           |          |
| Q9ULW0_kRFDFETVSYVPLAQVDFHk_T3_1            | Q9ULW0 | TPX2      | 22974 TPX2, microtubule nucleation factor                  | T316              |       |                  |                         |          |          |          |          |          |          |          |          |          |           |          |
| Q9ULW0_sDQPLTPVPSk_S11_1                    | Q9ULW0 | TPX2      | 22974 TPX2, microtubule nucleation factor                  | S738              |       |                  |                         |          |          |          |          |          |          |          |          |          |           |          |
| Q9UMZ2_rRSNLNNEKALPVIR_T5_1                 | Q9UMZ2 | SYNRG     | 11276 synergin gamma                                       | T1100             |       |                  |                         |          |          |          |          |          |          |          |          |          |           |          |
| Q9UMZ2_kEISGSENIETmTSLk_S4_1                | Q9UMZ2 | SYNRG     | 11276 synergin gamma                                       | T931.S932         |       |                  | 42.4;42.4               |          |          |          |          |          |          |          |          |          |           |          |
| Q9UMZ2_qLSLEGSGVEDLKDNTSPGk_S3_1            | Q9UMZ2 | SYNRG     | 11276 synergin gamma                                       | S752              |       |                  |                         |          |          |          |          |          |          |          |          |          |           |          |
| Q9UMZ2_rSLsGDkEISR_S4_1                     | Q9UMZ2 | SYNRG     | 11276 synergin gamma                                       | S1075             |       |                  |                         |          |          |          |          |          |          |          |          |          |           |          |
| Q9UMZ2_rSLsGDkEISR_S3_1                     | Q9UMZ2 | SYNRG     | 11276 synergin gamma                                       | S1075             |       |                  |                         |          |          |          |          |          |          |          |          |          |           |          |
| Q9UMZ2_rSLsGDkEISR_S3_1                     | Q9UMZ2 | SYNRG     | 11276 synergin gamma                                       | T1100             |       |                  |                         |          |          |          |          |          |          |          |          |          |           |          |
| Q9UN7_sPLTQEQNLPLAMk_S1_1                   | Q9UN7  | STUB1     | 10273 STUB1 homology and U-box containing protein 1        | S273              |       |                  |                         |          |          |          |          |          |          |          |          |          |           |          |
| Q9UNN5_sPmPNAEENAGDALLQFAEFSR_S2_1          | Q9UNN5 | FAF1      | 11124 Fas associated factor 1                              | S320              |       |                  |                         |          |          |          |          |          |          |          |          |          |           |          |
| Q9UPN4_ikLsHEALLQSDER_S3_1                  | Q9UPN4 | CEP131    | 22994 centrosomal protein 131                              | S731              |       |                  |                         |          |          |          |          |          |          |          |          |          |           |          |
| Q9UPN4_sGSPRPTPTDFLmLFEQSPGk_S1_1           | Q9UPN4 | CEP131    | 22994 centrosomal protein 131                              | S87               |       |                  |                         |          |          |          |          |          |          |          |          |          |           |          |
| Q9UPN4_sGSPRPTPTDFLmLFEQSPGk_S3_1           | Q9UPN4 | CEP131    | 22994 centrosomal protein 131                              | S89               |       |                  |                         |          |          |          |          |          |          |          |          |          |           |          |
| Q9UPT5_qYsQHGLDk_Y2_1                       | Q9UPT5 | EXOC7     | 23265 exocyst complex component 7                          | Y282              |       |                  |                         |          |          |          |          |          |          |          |          |          |           |          |
| Q9UPT8_aAKPGPAEASPTASPGDASPATAPYDPR_S21_1   | Q9UPT8 | ZC3H4     | 23211 zinc finger CCH-type containing 4                    | S1114             |       |                  |                         |          |          |          |          |          |          |          |          |          |           |          |
| Q9UPT8_rGSGSPFAGNsPAREEQDASLk_S11_1</       |        |           |                                                            |                   |       |                  |                         |          |          |          |          |          |          |          |          |          |           |          |





|          |        |                                                         |                      |            |          |         |         |         |         |         |         |         |         |         |         |         |         |         |         |         |         |         |          |          |          |          |          |
|----------|--------|---------------------------------------------------------|----------------------|------------|----------|---------|---------|---------|---------|---------|---------|---------|---------|---------|---------|---------|---------|---------|---------|---------|---------|---------|----------|----------|----------|----------|----------|
| Q43491_1 | 2037   | erythrocyte membrane protein band 4.1 like 2            | S87                  | 92.44      | PWLKQPK  | 0.2296  | 0.2065  | 0.2053  | 0.2309  | 0.1363  | 0.1568  | 0.1074  | 0.14672 | 0.10746 | 0.10959 | 0.08563 | 0.08889 | 0.63654 | 0.38567 | 0.87189 | 0.7222  | 0.00628 | 0.00157  | -1.1483  | -1.37457 |          |          |
| Q43516_1 | 7456   | WAS/WASL interacting protein family member 1            | S276                 | 100        | PPVGNRQ  | 0.22039 | 0.25549 | 0.24643 | 0.24077 | 0.15531 | 0.12861 | 0.18424 | 0.15608 | 0.08599 | 0.09728 | 0.08646 | 0.08991 | 0.64813 | 0.37343 | 0.8542  | 0.21878 | 0.01158 | 0.00107  | 0.62564  | -1.4211  |          |          |
| Q43516_2 | 7456   | WAS/WASL interacting protein family member 1            | W1P1                 | 99.45      | RLPQRNL  | 0.26457 | 0.25414 | 0.24572 | 0.25014 | 0.15328 | 0.12986 | 0.16768 | 0.15608 | 0.08908 | 0.09376 | 0.08546 | 0.08913 | 0.62757 | 0.40031 | 0.87173 | 0.71747 | 0.00053 | 0.00026  | 0.67124  | -1.2081  |          |          |
| Q43566_1 | 10366  | regulator of G-protein signaling 14                     | S218                 | 100        | PKLKPKS  | 0.1838  | 0.21938 | 0.22428 | 0.21522 | 0.14365 | 0.12575 | 0.15994 | 0.15211 | 0.10778 | 0.11581 | 0.08502 | 0.11697 | 0.70677 | 0.54348 | 0.68523 | 0.76908 | 0.02349 | 0.02338  | 0.50068  | -0.87971 |          |          |
| Q43572_1 | 1215   | A kinase anchoring protein 10                           | S56                  | 100        | ATLKKQPS | 0.2484  | 0.26509 | 0.19794 | 0.2295  | 0.1166  | 0.11926 | 0.12834 | 0.1584  | 0.1167  | 0.13309 | 0.09332 | 0.11623 | 0.69019 | 0.50646 | 0.50844 | 0.10121 | 0.05454 | 0.008    | 0.00329  | 0.98348  | 0.16123  |          |
| Q60293_1 | 196441 | zinc finger CH1-type containing                         | S352                 | 99.48      | NKLNTRIS | 0.19809 | 0.20033 | 0.22937 | 0.21522 | 0.15021 | 0.12873 | 0.1755  | 0.14955 | 0.06639 | 0.09127 | 0.09077 | 0.11685 | 0.21977 | 0.90077 | 0.67183 | 0.40778 | 0.8995  | 0.90397  | 0.20298  | 0.02101  | -0.57383 | -1.29412 |
| Q60493_1 | 8724   | soring nexin 3                                          | S72                  | 99.75      | STVRSYR  | 0.23066 | 0.22501 | 0.201   | 0.21889 | 0.14248 | 0.14552 | 0.14874 | 0.14545 | 0.14344 | 0.13623 | 0.13936 | 0.13967 | 0.66446 | 0.6381  | 0.00758 | 0.10019 | 0.01242 | 0.00105  | 0.50974  | 0.64816  |          |          |
| Q75044_1 | 23380  | SLIT-ROBO Rho GTPase activating protein 2               | S795.S796.50.50      | 48         | GDVGYER  | 0.18773 | 0.23447 | 0.20645 | 0.20965 | 0.14717 | 0.12183 | 0.15282 | 0.14127 | 0.1285  | 0.14613 | 0.07218 | 0.1156  | 0.67386 | 0.5514  | 0.13988 | 0.54654 | 0.01375 | 0.02805  | -0.58946 | -0.85882 |          |          |
| Q75044_2 | 23380  | SLIT-ROBO Rho GTPase activating protein 2               | S930                 | 100        | ATGARKS  | 0.18312 | 0.19637 | 0.20616 | 0.20851 | 0.13006 | 0.12404 | 0.14104 | 0.13171 | 0.08432 | 0.10916 | 0.06742 | 0.08697 | 0.63168 | 0.41708 | 0.58801 | 0.76572 | 0.00989 | 0.00343  | -0.66272 | -1.2616  |          |          |
| Q75113_1 | 9683   | NEDD4 binding protein 1                                 | T242                 | 98.65      | EARNKAG  | 0.1744  | 0.23623 | 0.23477 | 0.21619 | 0.14648 | 0.13993 | 0.15798 | 0.14813 | 0.16614 | 0.16012 | 0.16043 | 0.62553 | 0.68521 | 0.7518  | 0.08711 | 0.09521 | 0.00821 | 0.00885  | -0.54539 | -0.41157 |          |          |
| Q75152_1 | 9877   | zinc finger CCHC-type containing 11A                    | S290                 | 99.7       | RLGKRFS  | 0.26226 | 0.2831  | 0.23032 | 0.26536 | 0.15242 | 0.18045 | 0.13455 | 0.15581 | 0.08138 | 0.09025 | 0.06659 | 0.07941 | 0.60235 | 0.30699 | 0.65294 | 0.33354 | 0.00728 | 0.00045  | -0.73123 | -1.70375 |          |          |
| Q75152_2 | 9877   | zinc finger CCHC-type containing 11A                    | S290                 | 86.02      | MKTRRSL  | 0.23967 | 0.26249 | 0.2911  | 0.26855 | 0.12588 | 0.18479 | 0.21357 | 0.17472 | 0.09789 | 0.16011 | 0.09311 | 0.12244 | 0.65843 | 0.46414 | 0.82776 | 0.27056 | 0.00383 | 0.00412  | -0.60289 | -1.11588 |          |          |
| Q75152_3 | 9877   | zinc finger CCHC-type containing 11A                    | S758                 | 84.48      | SMKTRRS  | 0.22574 | 0.27422 | 0.21603 | 0.23867 | 0.15828 | 0.16716 | 0.17227 | 0.15939 | 0.07786 | 0.12466 | 0.06457 | 0.11089 | 0.66782 | 0.37289 | 0.972   | 0.98919 | 0.01492 | 0.00426  | -0.58247 | -1.42316 |          |          |
| Q75179_1 | 26057  | ankyrin repeat domain 17                                | S2401                | 97.71      | SSGVARR  | 0.17462 | 0.24066 | 0.2009  | 0.22008 | 0.09655 | 0.15806 | 0.12503 | 0.08272 | 0.15008 | 0.09544 | 0.11008 | 0.60344 | 0.53613 | 0.54    | 0.95302 | 0.40664 | 0.00028 | 0.00028  | -0.58773 | -0.89956 |          |          |
| Q75376_1 | 9611   | nuclear receptor corepressor 1                          | S158                 | 92.7       | KGHEAPS  | 0.2115  | 0.22549 | 0.26106 | 0.23868 | 0.14096 | 0.16477 | 0.17973 | 0.16382 | 0.116   | 0.14929 | 0.14774 | 0.13768 | 0.69545 | 0.59169 | 0.6457  | 0.10716 | 0.0886  | 0.00657  | -0.52398 | -0.75708 |          |          |
| Q75376_2 | 9611   | nuclear receptor corepressor 1                          | S70                  | 100        | QQLRRSP  | 0.19799 | 0.25562 | 0.28111 | 0.24524 | 0.13909 | 0.17457 | 0.1806  | 0.16475 | 0.09921 | 0.12993 | 0.08039 | 0.10338 | 0.67218 | 0.42072 | 0.77864 | 0.51069 | 0.04456 | 0.00764  | -0.5739  | -1.24906 |          |          |
| Q75420_1 | 64599  | GRB10 interacting GYF protein 1                         | S638                 | 99.91      | PTMSRSL  | 0.24625 | 0.27569 | 0.27839 | 0.26869 | 0.13231 | 0.15007 | 0.13942 | 0.12705 | 0.1383  | 0.10495 | 0.12343 | 0.52246 | 0.46253 | 0.04698 | 0.94688 | 0.01309 | 0.00595 | -0.93661 | -1.11238 |          |          |          |
| Q75427_1 | 4034   | leucine rich repeats and calponin homology domain 1     | S275.S279.99.95.87.1 | ALGDAPS    | 0.37449  | 0.44001 | 0.39314 | 0.40545 | 0.16889 | 0.14407 | 0.15398 | 0.15565 | 0.18011 | 0.20906 | 0.09537 | 0.16152 | 0.38475 | 0.39925 | 0.0205  | 0.56552 | 0.03081 | 0.0038  | -1.37802 | -1.32462 |          |          |          |
| Q75427_2 | 4034   | leucine rich repeats and calponin homology domain 1     | S275.S279.99.95.87.1 | ALGDAPS    | 0.37449  | 0.44001 | 0.39314 | 0.40545 | 0.16889 | 0.14407 | 0.15398 | 0.15565 | 0.18011 | 0.20906 | 0.09537 | 0.16152 | 0.38475 | 0.39925 | 0.0205  | 0.56552 | 0.03081 | 0.0038  | -1.37802 | -1.32462 |          |          |          |
| Q75592_1 | 23077  | MYC binding protein 2, E3 ubiquitin protein ligase      | S3424                | 76.2       | DEMRYLV  | 0.19311 | 0.22368 | 0.17727 | 0.19802 | 0.11535 | 0.0808  | 0.16226 | 0.11947 | 0.12907 | 0.16226 | 0.1346  | 0.14211 | 0.60331 | 0.31766 | 0.42397 | 0.73644 | 0.04491 | 0.03101  | -0.72903 | -0.47762 |          |          |
| Q75592_2 | 23077  | MYC binding protein 2, E3 ubiquitin protein ligase      | S3424.T34.33.3.3.3   | DEMRYLV    | 0.18123  | 0.2203  | 0.18234 | 0.19486 | 0.11274 | 0.07714 | 0.13375 | 0.10768 | 0.12278 | 0.15268 | 0.1456  | 0.14221 | 0.55362 | 0.31766 | 0.08846 | 0.66004 | 0.04091 | 0.02456 | -0.85204 | -1.04782 |          |          |          |
| Q75592_3 | 23077  | MYC binding protein 2, E3 ubiquitin protein ligase      | S3478                | 99.72      | TFVQFSY  | 0.21762 | 0.20564 | 0.16772 | 0.20566 | 0.09045 | 0.10591 | 0.08988 | 0.09273 | 0.11889 | 0.09922 | 0.1092  | 0.09782 | 0.55116 | 0.40031 | 0.0258  | 0.14765 | 0.00303 | 0.00727  | -1.1483  | -1.05799 |          |          |
| Q75592_4 | 23077  | MYC binding protein 2, E3 ubiquitin protein ligase      | S3476                | 97.89      | KTRVQFS  | 0.25698 | 0.22748 | 0.21346 | 0.23264 | 0.11993 | 0.08415 | 0.09998 | 0.10035 | 0.11425 | 0.07964 | 0.14265 | 0.11218 | 0.43137 | 0.48222 | 0.02116 | 0.62627 | 0.00159 | 0.00567  | -1.20327 | -1.50225 |          |          |
| Q75592_5 | 23077  | MYC binding protein 2, E3 ubiquitin protein ligase      | S3478                | 85.7       | TFVQFSY  | 0.2167  | 0.22008 | 0.20187 | 0.21134 | 0.14264 | 0.09217 | 0.11402 | 0.11638 | 0.14235 | 0.09266 | 0.14056 | 0.12519 | 0.54601 | 0.37829 | 0.12607 | 0.22262 | 0.00346 | 0.00701  | -0.87299 | -0.76725 |          |          |
| Q94915_1 | 285527 | FRY like transcription coactivator                      | S1957                | 90.50      | RRGDRRR  | 0.19972 | 0.19981 | 0.18863 | 0.19606 | 0.13414 | 0.13362 | 0.12515 | 0.13097 | 0.0947  | 0.09838 | 0.09299 | 0.09536 | 0.66801 | 0.48638 | 0.45495 | 0.31056 | 0.00016 | 0.15E-05 | -0.58205 | -1.03986 |          |          |
| Q94915_2 | 285527 | FRY like transcription coactivator                      | S1957.T15.50.50      | RRGDRRR    | 0.24522  | 0.20966 | 0.175   | 0.20789 | 0.14274 | 0.15374 | 0.13923 | 0.14674 | 0.1204  | 0.09758 | 0.13181 | 0.1166  | 0.70279 | 0.55844 | 0.26873 | 0.36537 | 0.0479  | 0.0171  | -0.58002 | -0.84048 |          |          |          |
| Q95243_1 | 8930   | methyl-CpG binding domain 4, DNA glycosylase            | S138.S319.48.66.48.1 | KKERSLKS   | 0.21233  | 0.18226 | 0.20633 | 0.20031 | 0.11494 | 0.10191 | 0.12349 | 0.11344 | 0.10934 | 0.13164 | 0.13301 | 0.12466 | 0.56635 | 0.62236 | 0.30642 | 0.82149 | 0.02039 | 0.00321 | -1.82022 | -0.68418 |          |          |          |
| Q95453_1 | 5073   | poly(A)-specific ribonuclease                           | S557                 | 99.49      | NHYNRN   | 0.25999 | 0.24175 | 0.2465  | 0.24941 | 0.0881  | 0.11097 | 0.12406 | 0.11041 | 0.06512 | 0.12142 | 0.09301 | 0.10698 | 0.44268 | 0.42892 | 0.02291 | 0.61548 | 0.00183 | 0.00031  | -1.76525 | -1.21211 |          |          |
| Q95685_1 | 5509   | protein phosphatase 1 regulatory subunit 3D             | S23.S225             | 50.50      | SKRLGPS  | 0.23928 | 0.28664 | 0.2724  | 0.2511  | 0.15163 | 0.13367 | 0.13723 | 0.14084 | 0.05658 | 0.10478 | 0.05555 | 0.073   | 0.56089 | 0.28793 | 0.72386 | 0.89328 | 0.0431  | 0.01812  | -0.8442  | -1.79621 |          |          |
| Q96072_1 | 4309   | checkpoint kinase 1                                     | S516                 | 85.57      | PLQVQPK  | 0.24851 | 0.23276 | 0.24416 | 0.23885 | 0.18489 | 0.16022 | 0.13003 | 0.16272 | 0.10138 | 0.09039 | 0.10581 | 0.1393  | 0.82319 | 0.7339  | 0.01032 | 1.5E-05 | 0.11252 | -1.27254 | 0.09017  | 0.09017  |          |          |
| Q96512_1 | 3728   | Jun proto-oncogene, AP-1 transcription factor subunit 3 | S263                 | 95.8       | KNSDLTS  | 0.2896  | 0.30023 | 0.17824 | 0.29411 | 0.066   | 0.06411 | 0.1296  | 0.0847  | 0.1374  | 0.08978 | 0.05816 | 0.07389 | 0.33986 | 0.29267 | 0.13957 | 0.17122 | 0.01851 | 0.00962  | -1.54946 | -1.75503 |          |          |
| Q96622_1 | 1738   | dihydrofolamide dehydrogenase                           | S506                 | 100        | LAASFQS  | 0.25678 | 0.23903 | 0.17901 | 0.22494 | 0.12763 | 0.03494 | 0.06303 | 0.07669 | 0.14039 | 0.13183 | 0.07194 | 0.14172 | 0.34093 | 0.51    | 0.33044 | 0.15154 | 0.01375 | 0.02592  | -1.55245 | -0.97142 |          |          |
| Q96622_2 | 1738   | dihydrofolamide dehydrogenase                           | S506                 | 47.35-47.1 | GFHPWKR  | 0.37816 | 0.45285 | 0.35383 | 0.38489 | 0.26048 | 0.04859 | 0.1524  | 0.1816  | 0.0841  | 0.1133  | 0.10389 | 0.10043 | 0.74789 | 0.25428 | 0.30608 | 0.11504 | 0.01172 | 0.00600  | -0.97738 | -1.97549 |          |          |
| Q96622_3 | 1738   | dihydrofolamide dehydrogenase                           | S506                 | 91.43      | HPWRKSS  | 0.35607 | 0.41188 | 0.28071 | 0.35622 | 0.2022  | 0.12931 | 0.13582 | 0.15578 | 0.10572 | 0.1227  | 0.07545 | 0.10129 | 0.43731 | 0.28435 | 0.09038 | 0.18226 | 0.01545 | 0.00509  | -1.19327 | -1.81426 |          |          |
| Q96744_1 | 4605   | MYB proto-oncogene like 2                               | S393.T403.82.67.98.5 | RGLIPLSP   | 0.17233  | 0.14987 | 0.20521 | 0.15824 | 0.119   | 0.12937 | 0.11148 | 0.11748 | 0.13025 | 0.10767 | 0.11977 | 0.11921 | 0.66813 | 0.67797 | 0.16483 | 0.28508 | 0.02037 | 0.00384 | -0.58719 | -0.56027 |          |          |          |
| Q96744_2 | 4605   | MYB proto-oncogene like 2                               | S393.T403.82.67.98.5 | RGLIPLSP   | 0.17233  | 0.14987 | 0.20521 | 0.15824 | 0.119   | 0.12937 | 0.11148 | 0.11748 | 0.13025 | 0.10767 | 0.11977 | 0.11921 | 0.66813 | 0.67797 | 0.16483 | 0.28508 | 0.02037 | 0.00384 | -0.58719 | -0.56027 |          |          |          |
| Q96744_3 | 4605   | MYB proto-oncogene like 2                               | S393.T403.82.67.98.5 | RGLIPLSP   | 0.17233  | 0.14987 | 0.20521 | 0.15824 | 0.119   | 0.12937 | 0.11148 | 0.11748 | 0.13025 | 0.10767 | 0.11977 | 0.11921 | 0.6     |         |         |         |         |         |          |          |          |          |          |



|                                     |        |         |       |                                                  |       |       |            |              |         |         |         |         |         |         |         |         |         |         |         |         |         |         |         |          |          |          |          |          |          |
|-------------------------------------|--------|---------|-------|--------------------------------------------------|-------|-------|------------|--------------|---------|---------|---------|---------|---------|---------|---------|---------|---------|---------|---------|---------|---------|---------|---------|----------|----------|----------|----------|----------|----------|
| Q12802_sAVLLVDETTATPIFANR_S1_1      | Q12802 | AKAP13  | 11214 | A-kinase anchoring protein 13                    | S1876 | 100   | QPKEPRRS   | 0.197        | 0.2159  | 0.23784 | 0.2571  | 0.13039 | 0.1007  | 0.09485 | 0.10865 | 0.0961  | 0.07695 | 0.1135  | 0.09552 | 0.50348 | 0.44263 | 0.0321  | 0.88041 | 0.00277  | 0.00164  | 0.49     | -1.17582 |          |          |
| Q12802_sAVLLVDETTATPIFANR_S1_2      | Q12802 | AKAP13  | 11214 | A-kinase anchoring protein 13                    | S1876 | 100   | QPKEPRRS   | 0.2895       | 0.1269  | 0.27312 | 0.25984 | 0.12166 | 0.0891  | 0.12819 | 0.11238 | 0.1589  | 0.11259 | 0.09671 | 0.12363 | 0.34842 | 0.4758  | 0.12485 | 0.28555 | 0.00425  | 0.08999  | -1.2015  | 1.07157  |          |          |
| Q12802_svsIQGNTGVGNMNTWK_S1_1       | Q12802 | AKAP13  | 11214 | A-kinase anchoring protein 13                    | S1906 | 93.63 | PLSKSVLS   | 0.29524      | 0.26939 | 0.17883 | 0.24781 | 0.13041 | 0.09533 | 0.11367 | 0.11314 | 0.08138 | 0.09528 | 0.06693 | 0.08139 | 0.45655 | 0.32843 | 0.1177  | 0.10598 | 0.01243  | 0.11011  | -1.13116 | 1.60636  |          |          |
| Q12830_HLPLPLATATLSTTTTTVTAAGGTEQR  | Q12830 | BPIF    | 2186  | bromodomain PHD finger transcription factor      | T2388 | 88.04 | VTXRFLLI   | 0.19941      | 0.19474 | 0.18099 | 0.19173 | 0.08577 | 0.11569 | 0.10493 | 0.11023 | 0.12829 | 0.09768 | 0.06893 | 0.0983  | 0.55273 | 0.51275 | 0.12932 | 0.1886  | 0.00098  | 0.00657  | -0.90825 | 0.96367  |          |          |
| Q12830_sLTSATSTSRSSSPPAAQGGVQV_S1_1 | Q12830 | BPIF    | 2186  | bromodomain PHD finger transcription factor      | S2252 | 65.56 | KLSTLRS    | 0.27783      | 0.28956 | 0.24954 | 0.27222 | 0.15456 | 0.15714 | 0.12371 | 0.14222 | 0.08671 | 0.09149 | 0.07111 | 0.07137 | 0.52187 | 0.29044 | 0.65632 | 0.7913  | 0.00263  | 0.00064  | -0.82831 | 1.23295  |          |          |
| Q12968_kTSDQALAAK_S1_1              | Q12968 | NFATC3  | 4775  | nuclear factor of activated T-cells 3            | S344  | 96.48 | PLKTRKTS   | 0.22074      | 0.20043 | 0.21189 | 0.23373 | 0.10857 | 0.14151 | 0.12057 | 0.11782 | 0.13319 | 0.11952 | 0.14949 | 0.09589 | 0.39823 | 0.65718 | 0.29339 | 0.59608 | 0.00015  | 0.00009  | -0.84978 | 0.65024  |          |          |
| Q12968_kTSDQALAAK_S1_2              | Q12968 | NFATC3  | 4775  | nuclear factor of activated T-cells 3            | S344  | 88.47 | PLKTRKTS   | 0.22146      | 0.23425 | 0.24778 | 0.24635 | 0.10949 | 0.16305 | 0.12008 | 0.13087 | 0.16013 | 0.13418 | 0.33386 | 0.44272 | 0.55803 | 0.60856 | 0.19678 | 0.68879 | 0.00457  | 0.01037  | -0.84158 | 0.17653  |          |          |
| Q13029_79RPSQLQSPDLADG_T_1          | Q13029 | PTC2    | 7423  | 89.63 GTRKRSQ                                    | T423  | 88.63 | KLKPKSQS   | 0.21272      | 0.25108 | 0.25779 | 0.23243 | 0.17303 | 0.15864 | 0.161   | 0.15903 | 0.12519 | 0.10801 | 0.11408 | 0.6272  | 0.47133 | 0.33988 | 0.3282  | 0.00945 | 0.00074  | -0.67031 | -1.0821  |          |          |          |
| Q13094_eNDEDVHQRPPLQPPALPMSSAGDQI   | Q13094 | LCF2    | 3937  | lymphocyte cytosolic protein 2                   | S338  | 5338  | 5338       | 25.25;25.25; | QPALLP  | 0.21881 | 0.24813 | 0.24338 | 0.23671 | 0.16065 | 0.16367 | 0.19376 | 0.17269 | 0.0626  | 0.98883 | 0.07169 | 0.07771 | 0.72396 | 0.3282  | 0.54495  | 0.28151  | 0.01005  | 0.00036  | -0.45529 | -1.60734 |
| Q13112_127PSPVSTVSPVSTVSTVSPVSTVSPV | Q13112 | CHP9    | 8208  | chromatin assembly factor 1 subunit B            | S538  | 79.38 | PTDGAQ     | 0.21766      | 0.26895 | 0.27221 | 0.23661 | 0.16172 | 0.18064 | 0.16621 | 0.13774 | 0.17858 | 0.14481 | 0.15701 | 0.6415  | 0.43187 | 0.78266 | 0.20001 | 0.01464 | -0.48396 | -0.60440 | 0.477    | 0.477    |          |          |
| Q13177_sYLFPTPEKDFGSPGATLNAK_V1_1   | Q13177 | PAK2    | 5062  | p62 (RAC1) activated kinase 2                    | S1939 | 5149  | 31.67      | 31.1         | SNTVYKQ | 0.15224 | 0.19024 | 0.19645 | 0.17596 | 0.12607 | 0.11108 | 0.14283 | 0.12636 | 0.13265 | 0.1289  | 0.14403 | 0.13519 | 0.7034  | 0.75257 | 0.00008  | 0.19335  | 0.03337  | 0.03784  | -0.50758 | -0.411   |
| Q13188_nAESPQDFRPMDFQV_T_1          | Q13188 | STK3    | 6788  | serine/threonine kinase 3                        | S123  | 31.68 | 42         | GTMKRNA      | 0.26252 | 0.26589 | 0.20947 | 0.24964 | 0.13866 | 0.11548 | 0.14112 | 0.13123 | 0.10261 | 0.11834 | 0.15566 | 0.1133  | 0.5356  | 0.46066 | 0.02983 | 0.08198  | 0.00467  | 0.00279  | -0.90079 | -1.1821  |          |
| Q13206_nAENVEDVQSPSHNR_S1_1         | Q13206 | DDX10   | 1652  | DEAD-box helicase 30                             | S851  | 93.57 | GMRKRS     | 0.18987      | 0.17644 | 0.21866 | 0.20999 | 0.13091 | 0.12254 | 0.17896 | 0.14464 | 0.15619 | 0.15287 | 0.11663 | 0.17179 | 0.68946 | 0.72716 | 0.47674 | 0.97419 | 0.15151  | 0.00469  | -0.55447 | -0.45966 |          |          |
| Q13370_kSAAEAEVVPWR_S1_1            | Q13370 | PDE3B   | 5140  | phosphodiesterase 3B                             | S279  | 5286  | 50.50      | APLRHLS      | 0.18007 | 0.18471 | 0.20257 | 0.18189 | 0.12859 | 0.13399 | 0.16538 | 0.14662 | 0.12129 | 0.14788 | 0.13803 | 0.13573 | 0.75332 | 0.71693 | 0.60108 | 0.85692  | 0.24666  | 0.00644  | -0.68666 | -0.48001 |          |
| Q13370_rSdGSLGVLPEQSSR_S1_1         | Q13370 | PDE3B   | 5140  | phosphodiesterase 3B                             | S442  | 82.1  | TPQLRSL    | 0.27631      | 0.22441 | 0.28606 | 0.25893 | 0.16644 | 0.14662 | 0.14862 | 0.15389 | 0.07852 | 0.08852 | 0.1078  | 0.09828 | 0.59435 | 0.37958 | 0.66017 | 0.32507 | 0.01076  | 0.00281  | -0.75623 | -1.39752 |          |          |
| Q13442_rMQLNSK_Q_S1_1               | Q13442 | PDAP1   | 11333 | PDGFA associated protein 1                       | S176  | 99.97 | SLGKRMQ    | 0.30809      | 0.32241 | 0.29143 | 0.31073 | 0.18026 | 0.1355  | 0.19137 | 0.16004 | 0.08441 | 0.08853 | 0.07747 | 0.04431 | 0.55007 | 0.27141 | 0.22423 | 0.002   | 1.9E-05  | -0.86231 | -1.88143 |          |          |          |
| Q13501_s5SPQSCcSDPQGGVGGATGQAEQV    | Q13501 | SQSTM1  | 8878  | sequestomins 1                                   | S320  | 3304  | 5306       | 49.91;49.1   | GGNVGEA | 0.24155 | 0.26298 | 0.26404 | 0.25619 | 0.14368 | 0.2072  | 0.18476 | 0.17872 | 0.09577 | 0.177   | 0.09731 | 0.10026 | 0.69761 | 0.39135 | 0.8742   | 0.41437  | 0.01828  | 4.6E-05  | -1.35345 | 0.345    |
| Q13546_mQLNDLVAVPSR_S1_1            | Q13546 | RPK1    | 8737  | receptor interacting serine/threonine kinase 1   | S320  | 100   | AVKWRMK    | 0.18393      | 0.16299 | 0.20797 | 0.19667 | 0.13699 | 0.09754 | 0.13918 | 0.12386 | 0.12565 | 0.15351 | 0.14496 | 0.14137 | 0.62883 | 0.71776 | 0.62883 | 0.10019 | 0.0068   | -0.69225 | -0.47842 |          |          |          |
| Q13546_rMQGLDcVAVPSR_S1_1           | Q13546 | RPK1    | 8737  | receptor interacting serine/threonine kinase 1   | S320  | 100   | AVKWRMK    | 0.24552      | 0.22681 | 0.19741 | 0.22265 | 0.11187 | 0.06626 | 0.13081 | 0.10964 | 0.12093 | 0.16143 | 0.16412 | 0.14863 | 0.49113 | 0.66574 | 0.04134 | 0.98821 | 0.04005  | 0.02027  | -1.02582 | 0.58966  |          |          |
| Q13546_rVSHQVFAQRPVEFNTEGK_S1_1     | Q13546 | RPK1    | 8737  | receptor interacting serine/threonine kinase 1   | S416  | 100   | EEHRVRS    | 0.26975      | 0.17281 | 0.22288 | 0.26261 | 0.14794 | 0.10425 | 0.11272 | 0.13443 | 0.16169 | 0.08759 | 0.07088 | 0.09149 | 0.92825 | 0.40371 | 0.11395 | 0.49696 | 0.02461  | 0.00779  | -0.75475 | -1.30861 |          |          |
| Q13905_cgRPSRPSRPSRPSRPSRPSRPSRPSR  | Q13905 | RAP1G1F | 2889  | Rap guanine nucleotide exchange factor 1         | T216  | 5217  | 49.21;49.1 | KGGRVSP      | 0.15522 | 0.16059 | 0.1819  | 0.16697 | 0.11711 | 0.10087 | 0.14437 | 0.11448 | 0.07873 | 0.08608 | 0.11032 | 0.09171 | 0.72759 | 0.54925 | 0.97873 | 0.75232  | 0.2947   | 0.044    | -0.45881 | -0.86445 |          |
| Q14149_hLSEGTNSVYATR_S1_1           | Q14149 | MORC3   | 23515 | MORC family CW-type zinc finger 3                | S514  | 100   | SVPRHLS    | 0.27425      | 0.23254 | 0.21994 | 0.23987 | 0.16805 | 0.15076 | 0.09915 | 0.13932 | 0.1352  | 0.13312 | 0.11446 | 0.27674 | 0.58082 | 0.52314 | 0.35901 | 0.25136 | 0.02029  | 0.0037   | -0.78933 | -0.91013 |          |          |
| Q14149_rSLTSLNLK_S1_1               | Q14149 | MORC3   | 23515 | MORC family CW-type zinc finger 3                | S464  | 5550  | 5550       | 62.19;61.9   | NKSLRKL | 0.3862  | 0.26288 | 0.26717 | 0.30542 | 0.18447 | 0.14446 | 0.09114 | 0.13459 | 0.06758 | 0.0502  | 0.08113 | 0.06960 | 0.44066 | 0.26712 | 0.12654  | 0.40875  | 0.01116  | 0.02657  | -1.18225 | -1.23978 |
| Q14149_sSLNLK_S1_1                  | Q14149 | MORC3   | 23515 | MORC family CW-type zinc finger 3                | S464  | 5550  | 5550       | 62.19;61.9   | NKSLRKL | 0.3862  | 0.26288 | 0.26717 | 0.30542 | 0.18447 | 0.14446 | 0.09114 | 0.13459 | 0.06758 | 0.0502  | 0.08113 | 0.06960 | 0.44066 | 0.26712 | 0.12654  | 0.40875  | 0.01116  | 0.02657  | -1.18225 | -1.23978 |
| Q14289_rHSMREEDFQPSR_S1_1           | Q14289 | PTC2B   | 2185  | protein tyrosine kinase 2 beta                   | S778  | 100   | HNFVKRF    | 0.25353      | 0.19741 | 0.17339 | 0.20105 | 0.10589 | 0.06804 | 0.10905 | 0.09443 | 0.11544 | 0.15877 | 0.1377  | 0.1373  | 0.348   | 0.50564 | 0.01992 | 0.33167 | 0.01238  | 0.01212  | -1.52848 | -0.98125 |          |          |
| Q14498_rYRSPGPK_Y_S1_1              | Q14498 | RM39    | 9584  | RNA binding motif protein 39                     | Y99   | 99.09 | RGYRNSPY   | 0.1627       | 0.18745 | 0.17813 | 0.17609 | 0.1281  | 0.09365 | 0.13803 | 0.11904 | 0.09992 | 0.11777 | 0.11905 | 0.11225 | 0.68112 | 0.63743 | 0.03036 | 0.84883 | 0.02125  | 0.02255  | -0.55401 | -0.64965 |          |          |
| Q14653_sPLNDTPFPMGLGPKSLR_S1_1      | Q14653 | IRF3    | 3163  | interferon regulatory factor 3                   | S173  | 87.17 | PCQPLRS    | 0.19081      | 0.2025  | 0.18643 | 0.19629 | 0.13454 | 0.11615 | 0.13357 | 0.12807 | 0.11837 | 0.13747 | 0.07592 | 0.11058 | 0.66275 | 0.57224 | 0.71818 | 0.13015 | 0.01015  | 0.1714   | -0.59346 | -0.80361 |          |          |
| Q14676_rRSVKTPEVTPVTFALQPSSTDRP_V1  | Q14676 | MDC1    | 13192 | mediator of DNA damage checkpoint 1              | S1192 | 45.71 | QVTRGRK    | 0.23897      | 0.251   | 0.29708 | 0.26235 | 0.13688 | 0.16009 | 0.13234 | 0.1431  | 0.14476 | 0.11427 | 0.16148 | 0.14017 | 0.54546 | 0.34249 | 0.20201 | 0.75715 | 0.01001  | 0.00555  | -0.87445 | -1.9043  |          |          |
| Q14676_rSVKTRVETVPTALQPSSTDRP_V1    | Q14676 | MDC1    | 13192 | mediator of DNA damage checkpoint 1              | T1201 | 49.3  | SSVTKPET   | 0.26483      | 0.23978 | 0.29094 | 0.26094 | 0.15804 | 0.17149 | 0.12653 | 0.15002 | 0.15867 | 0.12968 | 0.19149 | 0.15995 | 0.65571 | 0.60316 | 0.21016 | 0.62245 | 0.0056   | 0.01444  | -0.82186 | -0.7294  |          |          |
| Q14676_rSVKTRVETVPTALQPSSTDRP_V1    | Q14676 | MDC1    | 13195 | mediator of DNA damage checkpoint 1              | S1195 | 68.56 | RGRKSSR    | 0.19634      | 0.22022 | 0.32441 | 0.24699 | 0.1463  | 0.10659 | 0.14077 | 0.13122 | 0.12057 | 0.09909 | 0.10532 | 0.10833 | 0.53128 | 0.28958 | 0.30525 | 0.19729 | 0.02533  | 0.01244  | -1.9043  | -1.9043  |          |          |
| Q14676_rNSRSKTPESVPIALQPSSTR_S1_1   | Q14676 | MDC1    | 13195 | mediator of DNA damage checkpoint 1              | S1563 | 515   | 515        | 42.7;42.5    | RGRTRNS | 0.25666 | 0.26294 | 0.20369 | 0.25776 | 0.1704  | 0.1347  | 0.15985 | 0.15498 | 0.1115  | 0.11646 | 0.13545 | 0.12114 | 0.60126 | 0.46996 | 0.30038  | 0.24533  | 0.00071  | 6.2E-05  | -0.73394 | -1.0894  |
| Q14676_rNSRSKTPESVPIALQPSSTR_S1_2   | Q14676 | MDC1    | 13195 | mediator of DNA damage checkpoint 1              | S1564 | 515   | 515        | 42.7;42.5    | RGRTRNS | 0.17893 | 0.21833 | 0.22317 | 0.20622 | 0.12321 | 0.11089 | 0.15836 | 0.13082 | 0.11026 | 0.11942 | 0.16146 | 0.63436 | 0.56473 | 0.10973 | 0.01875  | 0.03006  | -0.65619 | -0.62248 |          |          |
| Q14738_rkSLPDQVYTR_S1_1             | Q14738 | PP2R5D  | 5528  | protein phosphatase 2 regulatory subunit B delta | S573  | 100   | KVLLRKS    | 0.23768      | 0.22254 | 0.19084 | 0.21207 | 0.12836 | 0.13223 | 0.10962 | 0.1234  | 0.10669 | 0.11486 | 0.10236 | 0.10797 | 0.56861 | 0.49752 | 0.06146 | 0.13174 | 0.00376  | 0.01058  | -0.81449 | -1.00716 |          |          |
| Q14938_rSLTPSSDITL_S1_1             | Q14938 | NIH     | 4784  | nucleolar protein 1 X                            | S265  | 99.82 | QVTLGRG    | 0.22064      | 0.17881 | 0.21145 | 0.20397 | 0.09955 | 0.10379 | 0.11317 | 0.1055  | 0.10596 | 0.11572 | 0.13684 | 0.11951 | 0.51726 | 0.58959 | 0.10504 | 0.70393 | 0.0097   | 0.00533  | -0.95104 | -0.77127 |          |          |
| Q15003_rSrvFDLQSDTSPR_S1_1          | Q15003 | NACAP   | 23397 | non-SMC condensin I complex subunit 3            | S70   | 100   | ERLQRKS    | 0.22993      | 0.23682 | 0.18186 | 0.2162  | 0.14742 | 0.17398 | 0.13596 | 0.15245 | 0.14998 | 0.14386 | 0.12557 | 0.13981 | 0.70518 | 0.66666 | 0.12349 | 0.30501 | 0.36567  | 0.01524  | -0.50403 | -0.62894 |          |          |
| Q15042_kHSASDVTNVDGDKG_S1_1         | Q15042 | RABGAP1 | 23920 | RAB3 GTPase activating protein catalytic subunit | S537  | 91.48 | RDEGRKTS   | 0.22881      | 0.2025  | 0.226   | 0.2191  | 0.10964 | 0.16088 | 0.13101 | 0.13383 | 0.1455  | 0.1524  | 0.16017 | 0.15269 | 0.61081 | 0.69687 | 0.38855 | 0.41039 | 0.01324  | 0.00208  | -0.712   | -0.52105 |          |          |
| Q15042_kHSASDVTNVDGDKG_S1_2         | Q15042 | RABGAP1 | 23920 | RAB3 GTPase activating protein catalytic subunit | S537  | 5539  | 48.58;48.1 | RDEGRK       |         |         |         |         |         |         |         |         |         |         |         |         |         |         |         |          |          |          |          |          |          |

|                                        |          |          |        |                                                  |       |        |          |          |         |         |         |         |         |         |         |         |         |         |         |         |         |         |          |         |          |          |          |          |
|----------------------------------------|----------|----------|--------|--------------------------------------------------|-------|--------|----------|----------|---------|---------|---------|---------|---------|---------|---------|---------|---------|---------|---------|---------|---------|---------|----------|---------|----------|----------|----------|----------|
| Q6PKG0_rCpQSSRRPAAMISQPTPTGQVPREDA     | Q6PKG0   | LARP1    | 23367  | La ribonucleoprotein domain family member 1      | S1056 | 60.67  | EQRRKPCS | 0.22763  | 0.18598 | 0.20393 | 0.20855 | 0.10949 | 0.14575 | 0.13905 | 0.12776 | 0.08574 | 0.14856 | 0.121   | 0.126   | 0.62066 | 0.6121  | 0.17516 | 0.09189  | 0.06078 | 0.00915  | -0.68813 | 0.70815  |          |
| Q6PKG0_rCpQSSRRPAAMISQPTPTGQVPREDA     | Q6PKG0   | LARP1    | 23367  | La ribonucleoprotein domain family member 1      | S1056 | 51.0   | 24.6124  | EQRRKPCS | 0.22806 | 0.20505 | 0.18975 | 0.20762 | 0.10989 | 0.13018 | 0.15991 | 0.13333 | 0.12431 | 0.15073 | 0.1167  | 0.13058 | 0.64216 | 0.62893 | 0.2821   | 0.92324 | 0.15335  | 0.0071   | -0.69    | 0.63904  |
| Q6PKG0_rCpQSSRRPAAMISQPTPTGQVPREDA     | Q6PKG0   | LARP1    | 23367  | La ribonucleoprotein domain family member 1      | S1058 | 51.6   | 30.58130 | RKRCPSQS | 0.19848 | 0.19483 | 0.19264 | 0.19522 | 0.10507 | 0.13586 | 0.1461  | 0.12324 | 0.11088 | 0.15031 | 0.10553 | 0.13258 | 0.66204 | 0.62617 | 0.26801  | 0.92928 | 0.0057   | 0.38282  | -0.59501 | 0.67538  |
| Q6PKG0_rCpQSSRRPAAMISQPTPTGQVPREDA     | Q6PKG0   | LARP1    | 23367  | La ribonucleoprotein domain family member 1      | S1059 | 51.0   | 40.1540  | KRCPSQS  | 0.25652 | 0.19748 | 0.23617 | 0.23006 | 0.10954 | 0.12752 | 0.13354 | 0.1382  | 0.1443  | 0.14639 | 0.13315 | 0.14128 | 0.60072 | 0.61411 | 0.101591 | 0.10661 | 0.01219  | 0.01755  | -0.7522  | 0.70342  |
| Q6PKG0_rCpQSSRRPAAMISQPTPTGQVPREDA     | Q6PKG0   | LARP1    | 23367  | La ribonucleoprotein domain family member 1      | S1059 | 51.6   | 29.1729  | KRCPSQS  | 0.27448 | 0.19996 | 0.23139 | 0.23523 | 0.11573 | 0.15423 | 0.1536  | 0.14096 | 0.14845 | 0.15571 | 0.1129  | 0.14429 | 0.59917 | 0.63126 | 0.22126  | 0.23978 | 0.0059   | 0.01589  | -0.7389  | 0.70393  |
| Q6LUV7_NSPSQATLNK_S1_1                 | Q6LUV7   | CR1C3    | 64784  | CREB regulated transcription coactivator 3       | S329  | 100    | SQLOSSRS | 0.26094  | 0.19787 | 0.19662 | 0.22564 | 0.11951 | 0.12165 | 0.11044 | 0.14246 | 0.12251 | 0.15447 | 0.09458 | 0.12088 | 0.5386  | 0.66136 | 0.75815 | 0.05511  | 0.1183  | 0.07915  | -0.97915 | 0.90078  |          |
| Q6LUV7_NSPSQATLNK_S1_4                 | Q6LUV7   | CR1C3    | 64784  | CREB regulated transcription coactivator 3       | S329  | 533.23 | 50.50    | SQLOSSRS | 0.34065 | 0.23343 | 0.24789 | 0.27065 | 0.10284 | 0.12509 | 0.09207 | 0.11567 | 0.14138 | 0.12188 | 0.0975  | 0.12026 | 0.42736 | 0.44432 | 0.15118  | 0.22444 | 0.01822  | 0.01655  | -1.22648 | -1.17034 |
| Q6LUV7_R0RPPGPOPEVWQLQR_S6_1           | Q6LUV7D8 | C1RC6F54 | 248397 | chromosome 16 encoding read frame 54             | S194  | 100    | ARQRQP   | 0.23053  | 0.21263 | 0.19694 | 0.21061 | 0.14258 | 0.15298 | 0.15104 | 0.1412  | 0.15074 | 0.15744 | 0.16709 | 0.15848 | 0.66073 | 0.74159 | 0.59076 | 0.38049  | 0.05557 | 0.06608  | -0.59786 | -0.41343 |          |
| Q6W2K4_gSGLNLFEDVQITEAPEEK_S3_1        | Q6W2K4   | RAB11FP1 | 80223  | RAB11 family interacting protein 1               | S1059 | 51.0   | AVRSRQ   | 0.21297  | 0.19871 | 0.20551 | 0.20753 | 0.14537 | 0.14511 | 0.17022 | 0.15416 | 0.08868 | 0.11305 | 0.11125 | 0.10433 | 0.74936 | 0.5071  | 0.7756  | 0.34201  | 0.06631 | 0.00043  | -0.41628 | -0.97966 |          |
| Q6W2K4_sKNDVLSRsNVCNNGNHYVLEQPEAK_S4_1 | RAB11FP1 | RAB11FP1 | 80223  | RAB11 family interacting protein 1               | S103  | 533.51 | 50.50    | RSKNDVLS | 0.30695 | 0.22874 | 0.20522 | 0.20654 | 0.15253 | 0.14104 | 0.09868 | 0.12078 | 0.12873 | 0.12057 | 0.12869 | 0.46164 | 0.49184 | 0.14385 | 0.47701  | 0.15175 | 0.04005  | -1.11515 | -1.02373 |          |
| Q6W2K4_sNVCNNGNHYVLEQPEAK_S1_1         | Q6W2K4   | RAB11FP1 | 80223  | RAB11 family interacting protein 1               | S315  | 100    | KNDVLSRS | 0.32592  | 0.24655 | 0.23944 | 0.27164 | 0.12915 | 0.15067 | 0.11007 | 0.12396 | 0.09908 | 0.13954 | 0.08664 | 0.09309 | 0.48021 | 0.34395 | 0.08092 | 0.03121  | 0.09409 | 0.022    | -1.05825 | -1.53973 |          |
| Q6ZM18_sLPSAGSSGGDQKLEKPEKGR_S3_1      | Q6ZM18   | AEBP2    | 121236 | AE binding protein 2                             | S141  | 86.03  | QSDTRSLS | 0.17796  | 0.2373  | 0.21903 | 0.21043 | 0.10016 | 0.16179 | 0.14282 | 0.13492 | 0.14409 | 0.13857 | 0.12799 | 0.13688 | 0.63813 | 0.6474  | 0.10576 | 0.1351   | 0.02907 | 0.01482  | -0.64809 | -0.62772 |          |
| Q6ZM18_sLPSAGSSGGDQKLEKPEKGR_S3_1      | Q6ZM18   | AEBP2    | 121236 | AE binding protein 2                             | S1025 | 90.34  | PRAPRS   | 0.25977  | 0.23955 | 0.20377 | 0.23436 | 0.11289 | 0.07807 | 0.11776 | 0.10772 | 0.10309 | 0.12719 | 0.15146 | 0.12725 | 0.46007 | 0.54294 | 0.17173 | 0.84208  | 0.04696 | 0.06761  | -1.1209  | -0.88112 |          |
| Q6ZM18_sLPSAGSSGGDQKLEKPEKGR_S3_1      | Q6ZM18   | PK3P41   | 118788 | phosphoinositide-3-kinase adaptor protein H      | S682  | 100    | IVPWRHS  | 0.24044  | 0.17151 | 0.24919 | 0.19257 | 0.13225 | 0.16603 | 0.14352 | 0.14772 | 0.11916 | 0.12111 | 0.10292 | 0.10776 | 0.67571 | 0.49444 | 0.22229 | 0.11434  | 0.0489  | 0.00655  | -1.55293 | -1.01615 |          |
| Q6ZM18_sLPSAGSSGGDQKLEKPEKGR_S3_1      | Q6ZM18   | PK3P41   | 118788 | phosphoinositide-3-kinase adaptor protein H      | S759  | 176.8  | 44.4444  | IVPWRHS  | 0.20819 | 0.20319 | 0.24632 | 0.1198  | 0.09968 | 0.06697 | 0.12618 | 0.13085 | 0.15414 | 0.15201 | 0.12164 | 0.1426  | 0.59531 | 0.64877 | 0.11664  | 0.76053 | 0.01975  | 0.01053  | -0.74209 | -0.62422 |
| Q72333_1KLEPESYDDMVTQYVNYNPEK_S16_1    | Q72333   | SETX     | 23064  | senataxin                                        | S333  | 90.75  | LDDMVTQ  | 0.23529  | 0.27255 | 0.23606 | 0.24797 | 0.19163 | 0.11293 | 0.16299 | 0.15585 | 0.0834  | 0.1044  | 0.12498 | 0.10426 | 0.62851 | 0.42045 | 0.59307 | 0.57622  | 0.02417 | 0.0112   | 0.67     | -1.24999 |          |
| Q72718_1NEI0SPSPVPEK_S1_1              | Q72718   | ZFVFE16  | 9765   | zinc finger FYVE-type containing 16              | S946  | 100    | SPSQVTS  | 0.22851  | 0.20429 | 0.20867 | 0.21387 | 0.11803 | 0.14188 | 0.14989 | 0.11855 | 0.14045 | 0.16004 | 0.13958 | 0.701   | 0.65279 | 0.24477 | 0.57826 | 0.0217   | 0.06625 | -0.51251 | -0.6153  |          |          |
| Q72717_1YEI0SQNPASPNTLGSQAK_T16_1      | Q72717   | NUPF2    | 57532  | NUPF2, FMR1 interacting protein 2                | S633  | 90.05  | PLASPNT  | 0.23765  | 0.22807 | 0.19509 | 0.22027 | 0.13481 | 0.11318 | 0.1723  | 0.1401  | 0.15271 | 0.14981 | 0.14933 | 0.15062 | 0.63603 | 0.68378 | 0.15179 | 0.01331  | 0.02048 | 0.01836  | -0.65283 | -0.54839 |          |
| Q72460_1F5R9QEDLNLEPKR_S3_1            | Q72460   | CLASP1   | 21196  | 23332 cytoplasmic linker associated protein 1    | T1696 | 99.28  | IEKFRSSQ | 0.17582  | 0.21857 | 0.15734 | 0.18224 | 0.11325 | 0.09049 | 0.14608 | 0.11781 | 0.12472 | 0.13182 | 0.11414 | 0.12339 | 0.66904 | 0.69227 | 0.20095 | 0.26243  | 0.03836 | 0.01655  | -0.54205 | -0.57039 |          |
| Q72460_1S5S0QESLNLRSLAS_S4_1           | Q72460   | CLASP1   | 21196  | 23332 cytoplasmic linker associated protein 1    | S558  | 75.97  | QSDRSSS  | 0.24523  | 0.19277 | 0.27074 | 0.23856 | 0.15335 | 0.15006 | 0.17047 | 0.15796 | 0.15911 | 0.14221 | 0.1387  | 0.14667 | 0.66215 | 0.48101 | 0.93728 | 0.16852  | 0.02027 | 0.01333  | -0.59478 | -0.70179 |          |
| Q72460_1S5S0QESLNLRSLAS_S4_1           | Q72460   | HDGF19   | 84717  | HDGF family 19                                   | S454  | 99.96  | VEKTRKRS | 0.19644  | 0.21298 | 0.19017 | 0.19963 | 0.112   | 0.10586 | 0.11246 | 0.11011 | 0.12206 | 0.08654 | 0.10468 | 0.55157 | 0.5239  | 0.20783 | 0.1111  | 0.00274  | 0.00177 | -0.85888 | -0.93265 |          |          |
| Q72519_1GTLALNHHGHSQGFPEEK_S12_1       | Q72519   | IRF2BP2  | 359948 | interferon regulatory factor 2 binding protein 2 | S318  | 100    | ALHGHG   | 0.44037  | 0.48355 | 0.27402 | 0.38558 | 0.07874 | 0.05954 | 0.06112 | 0.06276 | 0.08579 | 0.06654 | 0.07039 | 0.66691 | 0.7316  | 0.17443 | 0.00051 | 0.02173  | 0.00625 | -2.5383  | -2.51298 |          |          |
| Q72519_1NSNHPSSPMNQKR_S3_55_2          | Q72519   | IRF2BP2  | 359948 | interferon regulatory factor 2 binding protein 2 | S455  | 5457   | 99.9992  | HTSTRNS  | 0.18118 | 0.17549 | 0.17125 | 0.15977 | 0.12118 | 0.14134 | 0.13195 | 0.13149 | 0.12205 | 0.11528 | 0.11173 | 0.11636 | 0.74723 | 0.66126 | 0.78708  | 0.9505  | 0.00238  | 0.0414   | -0.42038 | -0.59671 |
| Q729P3_1R4B4                           | Q729P3   | RAB4P1   | 401258 | RAB44, member RAS oncogene family                | S444  | 99.77  | DPDGAPR  | 0.14141  | 0.2402  | 0.14534 | 0.16365 | 0.08038 | 0.07319 | 0.09171 | 0.09129 | 0.0876  | 0.0914  | 0.04706 | 0.07536 | 0.58785 | 0.46047 | 0.11885 | 0.65614  | 0.03162 | 0.0235   | 0.4404   | -1.11882 |          |
| Q86XK8_1SPKSLFLAYSPNSR_S4_1            | Q86XK8   | CEP57    | 9702   | centrosomal protein 57                           | S55   | 81.98  | SDLRSPS  | 0.20604  | 0.23625 | 0.2089  | 0.21706 | 0.16489 | 0.17076 | 0.14398 | 0.15974 | 0.14005 | 0.12701 | 0.13265 | 0.13324 | 0.73687 | 0.61883 | 0.24013 | 0.26636  | 0.01064 | 0.00126  | -0.46053 | -0.70408 |          |
| Q86YV5_1SGHWWPLAGLAKR_S2_1             | Q86YV5   | PRAG1    | 157285 | PEAK1 related, kinase-activating pseudokinase 1  | S889  | 100    | LEKAFKRS | 0.3302   | 0.34829 | 0.34902 | 0.34107 | 0.16883 | 0.17327 | 0.18209 | 0.16273 | 0.10747 | 0.14791 | 0.13467 | 0.10305 | 0.47712 | 0.38305 | 0.22158 | 0.34226  | 0.00205 | 0.0001   | -1.04578 | -1.38441 |          |
| Q86YV5_1SASFAPEPK_S1_1                 | Q86YV5   | PRAG1    | 157285 | PEAK1 related, kinase-activating pseudokinase 1  | S694  | 5696   | 50.50    | VGTGMK   | 0.26723 | 0.21652 | 0.20361 | 0.24412 | 0.16946 | 0.1672  | 0.14719 | 0.06644 | 0.08064 | 0.08173 | 0.07814 | 0.6054  | 0.32009 | 0.77095 | 0.11629  | 0.29203 | 0.00151  | -0.72403 | -1.63437 |          |
| Q86YV5_1KPEPEPQPLPSLQNASLLDTSKSS_S11   | Q86YV5   | DENND1   | 79958  | DENN domain containing 1                         | S1693 | 5627   | 42.3542  | EPEPPLS  | 0.21548 | 0.19178 | 0.20718 | 0.20481 | 0.12829 | 0.10764 | 0.14179 | 0.06413 | 0.08872 | 0.0881  | 0.2929  | 0.69285 | 0.45356 | 0.85759 | 0.85627  | 0.0044  | 0.00646  | -0.52938 | -1.40638 |          |
| Q8W52_1KRLTIDDELDFPFR_S4_1             | Q8W52    | SUTRKA   | 139065 | SLT and NTRK like family member 4                | S741  | 92.41  | VDFTRKRS | 0.22251  | 0.29609 | 0.24002 | 0.25231 | 0.16857 | 0.17748 | 0.15331 | 0.14645 | 0.07405 | 0.1112  | 0.08804 | 0.08443 | 0.57839 | 0.33343 | 0.582   | 0.5482   | 0.01611 | 0.00281  | -1.79988 | -1.58453 |          |
| Q8W52_1KRLTIDDELDFPFR_S4_1             | Q8W52    | MAP7D3   | 79649  | MAP7 domain containing 3                         | S185  | 1186   | 49.62489 | TAKWRKS  | 0.20842 | 0.26552 | 0.28701 | 0.13688 | 0.14866 | 0.16132 | 0.14893 | 0.09716 | 0.14779 | 0.1199  | 0.12162 | 0.58486 | 0.61677 | 0.43168 | 0.51649  | 0.01294 | 0.00868  | -0.73784 | -1.06518 |          |
| Q8W52_1KRLTIDDELDFPFR_S4_1             | Q8W52    | TRM122   | 3046   | triglycine motif containing 22                   | S388  | 5384   | 50.50    | SLNKRKS  | 0.23427 | 0.19398 | 0.25402 | 0.06754 | 0.07575 | 0.04629 | 0.06529 | 0.03632 | 0.0442  | 0.08043 | 0.04418 | 0.72776 | 0.73933 | 0.55644 | 0.21004  | 0.08083 | 0.0037   | -1.87429 | -2.52345 |          |
| Q8N122_1S5YSQGNR_S4_1                  | Q8N122   | RPTOR    | 57521  | regulatory associated protein of mTOR complex 1  | S722  | 95.4   | PKRYSVS  | 0.23654  | 0.23155 | 0.25115 | 0.23975 | 0.17379 | 0.15835 | 0.15372 | 0.16195 | 0.09498 | 0.12564 | 0.09966 | 0.10676 | 0.67552 | 0.44529 | 0.83292 | 0.55111  | 0.00077 | 0.00229  | -0.56593 | -1.16717 |          |
| Q8N122_1S5YSQGNR_S4_1                  | Q8N122   | NF870    | 59523  | zinc finger protein 687                          | S495  | 93.18  | TVSRVTS  | 0.24213  | 0.27694 | 0.18528 | 0.23478 | 0.11595 | 0.14637 | 0.15716 | 0.13982 | 0.04899 | 0.09298 | 0.09718 | 0.08181 | 0.59554 | 0.34846 | 0.93943 | 0.54867  | 0.32026 | 0.00177  | -4.72022 | -5.00933 |          |
| Q8N4C8_1GTRKPPQAPPPGPPNPNDLR_S2        | Q8N4C8   | MINK1    | 50848  | mishakin like kinase 1                           | S733  | 91.79  | PGPMMN   |          |         |         |         |         |         |         |         |         |         |         |         |         |         |         |          |         |          |          |          |          |

|                                        |         |        |        |                                                     |                              |         |          |         |         |         |         |         |         |         |         |         |         |         |         |         |         |         |         |          |          |          |
|----------------------------------------|---------|--------|--------|-----------------------------------------------------|------------------------------|---------|----------|---------|---------|---------|---------|---------|---------|---------|---------|---------|---------|---------|---------|---------|---------|---------|---------|----------|----------|----------|
| QB06F6_1h6GFGQDGRSGPPPPVGLK_S10_1      | QB06F6  | SENP7  | 511    | 98.98                                               | RKLGRRPS                     | 0.25346 | 0.19973  | 0.24445 | 0.22321 | 0.11863 | 0.1418  | 0.173   | 0.15105 | 0.09647 | 0.08488 | 0.0931  | 0.6481  | 0.39922 | 0.63398 | 0.11219 | 0.026   | 0.00133 | -0.2757 | -1.32473 |          |          |
| QB06F6_LDKVSLLEETAGVPSAPQQSGR_T1_T10_1 | QB06F8  | PYM1   | 84305  | PYM homolog 1, exon junction complex associated fac | T112.T121.47.05.47. EAELASRT | 0.19143 | 0.2396   | 0.22443 | 0.1489  | 0.12201 | 0.12183 | 0.17661 | 0.14050 | 0.10299 | 0.1389  | 0.13014 | 0.12401 | 0.64145 | 0.56759 | 0.60708 | 0.73256 | 0.02757 | 0.00613 | -0.6060  | -0.81708 |          |
| QB06F6_hkrSLSDQAEAPGSGDTE_S3_S6_1      | QB06V6  | UTP14A | 10813  | UTP14A, small subunit processome component          | S434.S437.S0.50.47           | 0.29653 | 0.28785  | 0.2985  | 0.25629 | 0.21562 | 0.21685 | 0.16344 | 0.13705 | 0.12161 | 0.13669 | 0.13154 | 0.08456 | 0.53625 | 0.63715 | 0.63104 | 0.8054  | 0.0082  | 0.04307 | -0.89001 | -0.6503  |          |
| QB06V19_aPQLPQLSGR_S3_1                | QB06V19 | KFC1   | 3833   | kinesin family member C1                            | S26                          | 100     | RPLKAPAS | 0.42599 | 0.39317 | 0.24897 | 0.35604 | 0.09822 | 0.05338 | 0.05601 | 0.0692  | 0.07022 | 0.08351 | 0.07186 | 0.07513 | 0.19436 | 0.11001 | 0.0047  | 0.01142 | 0.00743  | 0.03483  | -2.3652  |
| QB06V19_IPAKELPSSSPANNIR_S3_1          | QB06V19 | PAP0LG | 64895  | poly (A) polymerase gamma                           | S708                         | 100     | SRKKPLPS | 0.15939 | 0.21386 | 0.22914 | 0.22222 | 0.19328 | 0.13032 | 0.12123 | 0.14285 | 0.12694 | 0.12404 | 0.18861 | 0.14652 | 0.69024 | 0.25885 | 0.38127 | 0.00932 | 0.04839  | 0.57165  | 0.53464  |
| QB06V19_LrHPeLPOSSPANNIR_S3_1          | QB06V19 | PAP0LG | 64895  | poly (A) polymerase gamma                           | S708                         | 98.76   | SRKKPLPS | 0.24661 | 0.22662 | 0.27864 | 0.29429 | 0.11889 | 0.12585 | 0.15035 | 0.12927 | 0.1254  | 0.11242 | 0.18537 | 0.14106 | 0.15585 | 0.65865 | 0.06712 | 0.08556 | 0.00737  | 0.17147  | -0.94741 |
| QB06V19_gSLPDSGLTLEWPK_S3_1            | QB06V4  | OSB11  | 114885 | oxysterol binding protein like 11                   | S289                         | 83      | HOGKSLP  | 0.26881 | 0.29326 | 0.23882 | 0.26697 | 0.14615 | 0.11983 | 0.15777 | 0.14125 | 0.10652 | 0.1425  | 0.02889 | 0.09263 | 0.52908 | 0.34699 | 0.20005 | 0.36132 | 0.00288  | 0.00926  | -0.18343 |
| QB06V19_gSLPDSGLTLEWPK_S3_1            | QB06V4  | OSB11  | 114885 | oxysterol binding protein like 11                   | S289                         | 83      | HOGKSLP  | 0.26881 | 0.29326 | 0.23882 | 0.26697 | 0.14615 | 0.11983 | 0.15777 | 0.14125 | 0.10652 | 0.1425  | 0.02889 | 0.09263 | 0.52908 | 0.34699 | 0.20005 | 0.36132 | 0.00288  | 0.00926  | -0.18343 |
| QB06V19_gSLPDSGLTLEWPK_S3_1            | QB06V4  | OSB11  | 114885 | oxysterol binding protein like 11                   | S289                         | 83      | HOGKSLP  | 0.26881 | 0.29326 | 0.23882 | 0.26697 | 0.14615 | 0.11983 | 0.15777 | 0.14125 | 0.10652 | 0.1425  | 0.02889 | 0.09263 | 0.52908 | 0.34699 | 0.20005 | 0.36132 | 0.00288  | 0.00926  | -0.18343 |
| QB06V19_gSLPDSGLTLEWPK_S3_1            | QB06V4  | OSB11  | 114885 | oxysterol binding protein like 11                   | S289                         | 83      | HOGKSLP  | 0.26881 | 0.29326 | 0.23882 | 0.26697 | 0.14615 | 0.11983 | 0.15777 | 0.14125 | 0.10652 | 0.1425  | 0.02889 | 0.09263 | 0.52908 | 0.34699 | 0.20005 | 0.36132 | 0.00288  | 0.00926  | -0.18343 |
| QB06V19_gSLPDSGLTLEWPK_S3_1            | QB06V4  | OSB11  | 114885 | oxysterol binding protein like 11                   | S289                         | 83      | HOGKSLP  | 0.26881 | 0.29326 | 0.23882 | 0.26697 | 0.14615 | 0.11983 | 0.15777 | 0.14125 | 0.10652 | 0.1425  | 0.02889 | 0.09263 | 0.52908 | 0.34699 | 0.20005 | 0.36132 | 0.00288  | 0.00926  | -0.18343 |
| QB06V19_gSLPDSGLTLEWPK_S3_1            | QB06V4  | OSB11  | 114885 | oxysterol binding protein like 11                   | S289                         | 83      | HOGKSLP  | 0.26881 | 0.29326 | 0.23882 | 0.26697 | 0.14615 | 0.11983 | 0.15777 | 0.14125 | 0.10652 | 0.1425  | 0.02889 | 0.09263 | 0.52908 | 0.34699 | 0.20005 | 0.36132 | 0.00288  | 0.00926  | -0.18343 |
| QB06V19_gSLPDSGLTLEWPK_S3_1            | QB06V4  | OSB11  | 114885 | oxysterol binding protein like 11                   | S289                         | 83      | HOGKSLP  | 0.26881 | 0.29326 | 0.23882 | 0.26697 | 0.14615 | 0.11983 | 0.15777 | 0.14125 | 0.10652 | 0.1425  | 0.02889 | 0.09263 | 0.52908 | 0.34699 | 0.20005 | 0.36132 | 0.00288  | 0.00926  | -0.18343 |
| QB06V19_gSLPDSGLTLEWPK_S3_1            | QB06V4  | OSB11  | 114885 | oxysterol binding protein like 11                   | S289                         | 83      | HOGKSLP  | 0.26881 | 0.29326 | 0.23882 | 0.26697 | 0.14615 | 0.11983 | 0.15777 | 0.14125 | 0.10652 | 0.1425  | 0.02889 | 0.09263 | 0.52908 | 0.34699 | 0.20005 | 0.36132 | 0.00288  | 0.00926  | -0.18343 |
| QB06V19_gSLPDSGLTLEWPK_S3_1            | QB06V4  | OSB11  | 114885 | oxysterol binding protein like 11                   | S289                         | 83      | HOGKSLP  | 0.26881 | 0.29326 | 0.23882 | 0.26697 | 0.14615 | 0.11983 | 0.15777 | 0.14125 | 0.10652 | 0.1425  | 0.02889 | 0.09263 | 0.52908 | 0.34699 | 0.20005 | 0.36132 | 0.00288  | 0.00926  | -0.18343 |
| QB06V19_gSLPDSGLTLEWPK_S3_1            | QB06V4  | OSB11  | 114885 | oxysterol binding protein like 11                   | S289                         | 83      | HOGKSLP  | 0.26881 | 0.29326 | 0.23882 | 0.26697 | 0.14615 | 0.11983 | 0.15777 | 0.14125 | 0.10652 | 0.1425  | 0.02889 | 0.09263 | 0.52908 | 0.34699 | 0.20005 | 0.36132 | 0.00288  | 0.00926  | -0.18343 |
| QB06V19_gSLPDSGLTLEWPK_S3_1            | QB06V4  | OSB11  | 114885 | oxysterol binding protein like 11                   | S289                         | 83      | HOGKSLP  | 0.26881 | 0.29326 | 0.23882 | 0.26697 | 0.14615 | 0.11983 | 0.15777 | 0.14125 | 0.10652 | 0.1425  | 0.02889 | 0.09263 | 0.52908 | 0.34699 | 0.20005 | 0.36132 | 0.00288  | 0.00926  | -0.18343 |
| QB06V19_gSLPDSGLTLEWPK_S3_1            | QB06V4  | OSB11  | 114885 | oxysterol binding protein like 11                   | S289                         | 83      | HOGKSLP  | 0.26881 | 0.29326 | 0.23882 | 0.26697 | 0.14615 | 0.11983 | 0.15777 | 0.14125 | 0.10652 | 0.1425  | 0.02889 | 0.09263 | 0.52908 | 0.34699 | 0.20005 | 0.36132 | 0.00288  | 0.00926  | -0.18343 |
| QB06V19_gSLPDSGLTLEWPK_S3_1            | QB06V4  | OSB11  | 114885 | oxysterol binding protein like 11                   | S289                         | 83      | HOGKSLP  | 0.26881 | 0.29326 | 0.23882 | 0.26697 | 0.14615 | 0.11983 | 0.15777 | 0.14125 | 0.10652 | 0.1425  | 0.02889 | 0.09263 | 0.52908 | 0.34699 | 0.20005 | 0.36132 | 0.00288  | 0.00926  | -0.18343 |
| QB06V19_gSLPDSGLTLEWPK_S3_1            | QB06V4  | OSB11  | 114885 | oxysterol binding protein like 11                   | S289                         | 83      | HOGKSLP  | 0.26881 | 0.29326 | 0.23882 | 0.26697 | 0.14615 | 0.11983 | 0.15777 | 0.14125 | 0.10652 | 0.1425  | 0.02889 | 0.09263 | 0.52908 | 0.34699 | 0.20005 | 0.36132 | 0.00288  | 0.00926  | -0.18343 |
| QB06V19_gSLPDSGLTLEWPK_S3_1            | QB06V4  | OSB11  | 114885 | oxysterol binding protein like 11                   | S289                         | 83      | HOGKSLP  | 0.26881 | 0.29326 | 0.23882 | 0.26697 | 0.14615 | 0.11983 | 0.15777 | 0.14125 | 0.10652 | 0.1425  | 0.02889 | 0.09263 | 0.52908 | 0.34699 | 0.20005 | 0.36132 | 0.00288  | 0.00926  | -0.18343 |
| QB06V19_gSLPDSGLTLEWPK_S3_1            | QB06V4  | OSB11  | 114885 | oxysterol binding protein like 11                   | S289                         | 83      | HOGKSLP  | 0.26881 | 0.29326 | 0.23882 | 0.26697 | 0.14615 | 0.11983 | 0.15777 | 0.14125 | 0.10652 | 0.1425  | 0.02889 | 0.09263 | 0.52908 | 0.34699 | 0.20005 | 0.36132 | 0.00288  | 0.00926  | -0.18343 |
| QB06V19_gSLPDSGLTLEWPK_S3_1            | QB06V4  | OSB11  | 114885 | oxysterol binding protein like 11                   | S289                         | 83      | HOGKSLP  | 0.26881 | 0.29326 | 0.23882 | 0.26697 | 0.14615 | 0.11983 | 0.15777 | 0.14125 | 0.10652 | 0.1425  | 0.02889 | 0.09263 | 0.52908 | 0.34699 | 0.20005 | 0.36132 | 0.00288  | 0.00926  | -0.18343 |
| QB06V19_gSLPDSGLTLEWPK_S3_1            | QB06V4  | OSB11  | 114885 | oxysterol binding protein like 11                   | S289                         | 83      | HOGKSLP  | 0.26881 | 0.29326 | 0.23882 | 0.26697 | 0.14615 | 0.11983 | 0.15777 | 0.14125 | 0.10652 | 0.1425  | 0.02889 | 0.09263 | 0.52908 | 0.34699 | 0.20005 | 0.36132 | 0.00288  | 0.00926  | -0.18343 |
| QB06V19_gSLPDSGLTLEWPK_S3_1            | QB06V4  | OSB11  | 114885 | oxysterol binding protein like 11                   | S289                         | 83      | HOGKSLP  | 0.26881 | 0.29326 | 0.23882 | 0.26697 | 0.14615 | 0.11983 | 0.15777 | 0.14125 | 0.10652 | 0.1425  | 0.02889 | 0.09263 | 0.52908 | 0.34699 | 0.20005 | 0.36132 | 0.00288  | 0.00926  | -0.18343 |
| QB06V19_gSLPDSGLTLEWPK_S3_1            | QB06V4  | OSB11  | 114885 | oxysterol binding protein like 11                   | S289                         | 83      | HOGKSLP  | 0.26881 | 0.29326 | 0.23882 | 0.26697 | 0.14615 | 0.11983 | 0.15777 | 0.14125 | 0.10652 | 0.1425  | 0.02889 | 0.09263 | 0.52908 | 0.34699 | 0.20005 | 0.36132 | 0.00288  | 0.00926  | -0.18343 |
| QB06V19_gSLPDSGLTLEWPK_S3_1            | QB06V4  | OSB11  | 114885 | oxysterol binding protein like 11                   | S289                         | 83      | HOGKSLP  | 0.26881 | 0.29326 | 0.23882 | 0.26697 | 0.14615 | 0.11983 | 0.15777 | 0.14125 | 0.10652 | 0.1425  | 0.02889 | 0.09263 | 0.52908 | 0.34699 | 0.20005 | 0.36132 | 0.00288  | 0.00926  | -0.18343 |
| QB06V19_gSLPDSGLTLEWPK_S3_1            | QB06V4  | OSB11  | 114885 | oxysterol binding protein like 11                   | S289                         | 83      | HOGKSLP  | 0.26881 | 0.29326 | 0.23882 | 0.26697 | 0.14615 | 0.11983 | 0.15777 | 0.14125 | 0.10652 | 0.1425  | 0.02889 | 0.09263 | 0.52908 | 0.34699 | 0.20005 | 0.36132 | 0.00288  | 0.00926  | -0.18343 |
| QB06V19_gSLPDSGLTLEWPK_S3_1            | QB06V4  | OSB11  | 114885 | oxysterol binding protein like 11                   | S289                         | 83      | HOGKSLP  | 0.26881 | 0.29326 | 0.23882 | 0.26697 | 0.14615 | 0.11983 | 0.15777 | 0.14125 | 0.10652 | 0.1425  | 0.02889 | 0.09263 | 0.52908 | 0.34699 | 0.20005 | 0.36132 | 0.00288  | 0.00926  | -0.18343 |
| QB06V19_gSLPDSGLTLEWPK_S3_1            | QB06V4  | OSB11  | 114885 | oxysterol binding protein like 11                   | S289                         | 83      | HOGKSLP  | 0.26881 | 0.29326 | 0.23882 | 0.26697 | 0.14615 | 0.11983 | 0.15777 | 0.14125 | 0.10652 | 0.1425  | 0.02889 | 0.09263 | 0.52908 | 0.34699 | 0.20005 | 0.36132 | 0.00288  | 0.00926  | -0.18343 |
| QB06V19_gSLPDSGLTLEWPK_S3_1            | QB06V4  | OSB11  | 114885 | oxysterol binding protein like 11                   | S289                         | 83      | HOGKSLP  | 0.26881 | 0.29326 | 0.23882 | 0.26697 | 0.14615 | 0.11983 | 0.15777 | 0.14125 | 0.10652 | 0.1425  | 0.02889 | 0.09263 | 0.52908 | 0.34699 | 0.20005 | 0.36132 | 0.00288  | 0.00926  | -0.18343 |
| QB06V19_gSLPDSGLTLEWPK_S3_1            | QB06V4  | OSB11  | 114885 | oxysterol binding protein like 11                   | S289                         | 83      | HOGKSLP  | 0.26881 | 0.29326 | 0.23882 | 0.26697 | 0.14615 | 0.11983 | 0.15777 | 0.14125 | 0.10652 | 0.1425  | 0.02889 | 0.09263 | 0.52908 | 0.34699 | 0.20005 | 0.36132 | 0.00288  | 0.00926  | -0.18343 |
| QB06V19_gSLPDSGLTLEWPK_S3_1            | QB06V4  | OSB11  | 114885 | oxysterol binding protein like 11                   | S289                         | 83      | HOGKSLP  | 0.26881 | 0.29326 | 0.23882 | 0.26697 | 0.14615 | 0.11983 | 0.15777 | 0.14125 | 0.10652 | 0.1425  | 0.02889 | 0.09263 | 0.52908 | 0.34699 | 0.20005 | 0.36132 | 0.00288  | 0.00926  | -0.18343 |
| QB06V19_gSLPDSGLTLEWPK_S3_1            | QB06V4  | OSB11  | 114885 | oxysterol binding protein like 11                   | S289                         | 83      | HOGKSLP  | 0.26881 | 0.29326 | 0.23882 | 0.26697 | 0.14615 | 0.11983 | 0.15777 | 0.14125 | 0.10652 | 0.1425  | 0.02889 | 0.09263 | 0.52908 | 0.34699 | 0.20005 | 0.36132 | 0.00288  | 0.00926  | -0.18343 |
| QB06V19_gSLPDSGLTLEWPK_S3_1            | QB06V4  | OSB11  | 114885 | oxysterol binding protein like 11                   | S289                         | 83      | HOGKSLP  | 0.26881 | 0.29326 | 0.23882 | 0.26697 | 0.14615 | 0.11983 | 0.15777 | 0.14125 | 0.10652 | 0.1425  | 0.02889 | 0.09263 | 0.52908 | 0.34699 | 0.20005 | 0.36132 | 0.00288  | 0.00926  | -0.18343 |
|                                        |         |        |        |                                                     |                              |         |          |         |         |         |         |         |         |         |         |         |         |         |         |         |         |         |         |          |          |          |



5. Phosphites downregulated at DAPK3 consensus site (R/K-X-X-S/T) in shDAPK3#1 cells (165 genes) (P<0.05, log2FC<-0.4)

16 proteins in red character have phosphosites corresponds to both DAPK3 consensus and IKK consensus (S-X-X-S/T)

| Protein    | Gene     | Gene ID | Description                                                 | Prot_Loc | PTM_Score | Flank_Seq        | R/K-X-X-S/T | S-X-X-S/T | shControl | shControl | shControl | shDAPK3# | shDAPK3# | shDAPK3# | shDAPK3# | shControl_FC | F test   | P value  | LogFC    |          |
|------------|----------|---------|-------------------------------------------------------------|----------|-----------|------------------|-------------|-----------|-----------|-----------|-----------|----------|----------|----------|----------|--------------|----------|----------|----------|----------|
| A0A0G2JK23 | BAG6     | 7917    | Large proline-rich protein BAG6                             | T1053    | 100       | MPAKRRRTMQGEGPQ  | R           | A         | 0.223186  | 0.251044  | 0.219192  | 0.146726 | 0.131888 | 0.140124 | 0.139579 | 0.231141     | 0.603872 | 0.310137 | 0.001099 | -0.72769 |
| E7EVC7     | ATG16L1  | 55054   | Autophagy-related protein 16-1                              | S304     | 78.76     | SDAARRRSTVSSFFVP | R           | A         | 0.171396  | 0.187948  | 0.191746  | 0.134541 | 0.140589 | 0.13245  | 0.13586  | 0.183697     | 0.739588 | 0.264746 | 0.002043 | -0.43521 |
| F8VVT9     | AGAP2    | 116986  | Arf-GAP with GTPase, ANK repeat and PH domain-containing    | T647     | 50        | HRAAKRRRTSDFANRR | K           | A         | 0.253014  | 0.28169   | 0.169271  | 0.142136 | 0.087061 | 0.124159 | 0.117785 | 0.234658     | 0.501944 | 0.37553  | 0.035417 | -0.9944  |
| F8VVT9     | AGAP2    | 116986  | Arf-GAP with GTPase, ANK repeat and PH domain-containing    | S648     | 50        | RAAKRRRTSDFANRR  | R           | A         | 0.253014  | 0.28169   | 0.169271  | 0.142136 | 0.087061 | 0.124159 | 0.117785 | 0.234658     | 0.501944 | 0.37553  | 0.035417 | -0.9944  |
| H0Y9Y3     | SYNPO2   | 171024  | Synapopodin-2 (Fragment)                                    | S544     | 99.68     | AHAARAQSTPSSLRPA | R           | A         | 0.238076  | 0.205604  | 0.209995  | 0.064005 | 0.095618 | 0.034767 | 0.046797 | 0.217892     | 0.297381 | 0.501995 | 0.001657 | -1.74962 |
| I3L2J0     | CIC      | 23152   | Protein capicua homolog                                     | T472     | 100       | APAAARARPTLTAQAQ | R           | A         | 0.175546  | 0.262338  | 0.23606   | 0.104573 | 0.112369 | 0.142958 | 0.119967 | 0.224648     | 0.534022 | 0.344113 | 0.020712 | -0.90503 |
| Q9BXX1     | KLF16    | 83855   | Krueppel-like factor 16                                     | S226     | 35.74     | RPGARSTSPDLSLPC  | R           | A         | 0.232453  | 0.255797  | 0.261836  | 0.124996 | 0.159839 | 0.159485 | 0.148107 | 0.250029     | 0.592359 | 0.750824 | 0.002227 | -0.75546 |
| W0Z7M9     | MRTFA    | 57591   | Mkl1 variant 1 Mkl1_5                                       | S368     | 81.41     | CGLARQNSTSLTGKPK | R           | A         | 0.225985  | 0.252861  | 0.219449  | 0.137514 | 0.11689  | 0.151283 | 0.135229 | 0.232765     | 0.580969 | 0.977299 | 0.002414 | -0.78347 |
| B7ZBB8     | PPP1R3G  | 648791  | Protein phosphatase 1 regulatory subunit 3G                 | S86      | 50        | RCRARSSFLPADPIL  | R           | A         | 0.372386  | 0.280037  | 0.297685  | 0.165321 | 0.204169 | 0.182263 | 0.183918 | 0.316703     | 0.580727 | 0.27265  | 0.012063 | -0.78407 |
| Q6ZRV2     | FAM83H   | 286077  | Protein FAM83H                                              | S1025    | 90.34     | GPRARLSSATANALY  | R           | A         | 0.259773  | 0.23955   | 0.203769  | 0.126903 | 0.078968 | 0.117597 | 0.107823 | 0.234364     | 0.460605 | 0.890939 | 0.004521 | -1.12009 |
| Q9Z766     | RREB1    | 6239    | Ras-responsive element-binding protein 1                    | S1238    | 90.03     | LLRAKRRSTYNTCLQK | K           | A         | 0.216126  | 0.287761  | 0.231245  | 0.13712  | 0.125866 | 0.164325 | 0.142347 | 0.245044     | 0.581271 | 0.430443 | 0.014035 | -0.78272 |
| Q12789     | GTF3C1   | 2975    | General transcription factor 3C polypeptide 1               | S1173    | 100       | PLSARGNSRLNIWGE  | R           | A         | 0.20537   | 0.241067  | 0.158369  | 0.118287 | 0.090761 | 0.096015 | 0.101687 | 0.201602     | 0.504398 | 0.20854  | 0.017028 | -0.98737 |
| Q15365     | PCBP1    | 5093    | Poly(rC)-binding protein 1                                  | S246     | 100       | NQVARQQSHFAMMHG  | R           | A         | 0.236852  | 0.25486   | 0.175239  | 0.09826  | 0.096368 | 0.09491  | 0.096513 | 0.222317     | 0.434122 | 0.00323  | 0.034627 | -1.20383 |
| A8K727     | PLEKHA2  | 59339   | Pleckstrin homology domain-containing family A member 2     | S349     | 98.41     | KALCKAPSVASSWQP  | K           | C         | 0.274571  | 0.271285  | 0.176101  | 0.160336 | 0.084141 | 0.119188 | 0.121222 | 0.240652     | 0.503721 | 0.63484  | 0.037812 | -0.9893  |
| B7ZBB8     | PPP1R3G  | 648791  | Protein phosphatase 1 regulatory subunit 3G                 | S84      | 100       | RRRCARSSFLPADP   | R           | A         | 0.308807  | 0.25683   | 0.2185    | 0.165579 | 0.121358 | 0.141069 | 0.142669 | 0.261379     | 0.545832 | 0.38567  | 0.015153 | -0.87347 |
| O94915     | FRYL     | 285527  | Protein furry homolog-like                                  | S1957    | 90.58     | RRGDRRRSTLNDLMD  | R           | D         | 0.199725  | 0.19981   | 0.188631  | 0.134135 | 0.13362  | 0.125148 | 0.130968 | 0.196055     | 0.668015 | 0.762406 | 0.00016  | -0.58205 |
| Q9BZ23     | PANK2    | 80025   | Pantothenate kinase 2, mitochondrial                        | S189     | 92.59     | FRDRRLSYGSYPTFSV | R           | D         | 0.22669   | 0.22301   | 0.204318  | 0.114812 | 0.131919 | 0.139344 | 0.128692 | 0.218006     | 0.590312 | 0.952473 | 0.000881 | -0.76045 |
| Q9P0L0     | VAPA     | 9218    | Vesicle-associated membrane protein-associated protein A    | S214     | 45.48     | AHSDRKPSTSTASFR  | K           | D         | 0.256523  | 0.26201   | 0.26657   | 0.070704 | 0.095489 | 0.102412 | 0.089535 | 0.261701     | 0.342126 | 0.166883 | 6.82E-05 | -1.5474  |
| P48382     | RFX5     | 5993    | DNA-binding protein RFX5                                    | S308     | 99.99     | ARGERKKSWSVEASP  | R           | E         | 0.224836  | 0.22821   | 0.195264  | 0.133474 | 0.129013 | 0.110894 | 0.12446  | 0.214307     | 0.580757 | 0.68754  | 0.001585 | -0.78399 |
| Q92608     | DOCK2    | 1794    | Dedicator of cytokinesis protein 2                          | S1592    | 100       | KIHERKRSNDLRFPH  | K           | E         | 0.155028  | 0.136922  | 0.189077  | 0.057573 | 0.088856 | 0.087686 | 0.078038 | 0.160343     | 0.486698 | 0.619236 | 0.011049 | -1.0389  |
| O15042     | U2SURP   | 23350   | U2 snRNP-associated SURP motif-containing protein           | S202     | 100       | GEKEKKSNNLELPEK  | K           | E         | 0.195988  | 0.212214  | 0.234551  | 0.122604 | 0.134704 | 0.105038 | 0.120782 | 0.214251     | 0.563742 | 0.744923 | 0.002695 | -0.82689 |
| O95243     | MBD4     | 8930    | Methyl-CpG-binding domain protein 4                         | S318     | 48.66     | KKKERLSSGGNFCPS  | R           | D         | 0.212333  | 0.182262  | 0.206328  | 0.114935 | 0.101909 | 0.12349  | 0.113445 | 0.200308     | 0.566354 | 0.636055 | 0.001452 | -0.82022 |
| Q12802     | AKAP13   | 11214   | A-kinase anchor protein 13                                  | S1876    | 100       | QPKERPSSAVLLVDE  | R           | E         | 0.210401  | 0.192801  | 0.156084  | 0.130645 | 0.108412 | 0.10568  | 0.114912 | 0.186429     | 0.616388 | 0.392439 | 0.16034  | -0.69809 |
| Q9UIJ6     | DBNL     | 28988   | Drebrin-like protein                                        | S269     | 32.75     | KQKERAMTSITSSP   | R           | E         | 0.280407  | 0.246683  | 0.203303  | 0.167998 | 0.127564 | 0.141345 | 0.145236 | 0.243464     | 0.596538 | 0.419195 | 0.017345 | -0.74531 |
| Q9H4L7     | SMARCD1  | 56916   | SWI/SNF-related matrix-associated actin-dependent regulator | S79      | 99.95     | PDNERKASISYFKNQ  | R           | E         | 0.24465   | 0.267632  | 0.276765  | 0.130337 | 0.117483 | 0.118462 | 0.122094 | 0.263016     | 0.464207 | 0.315062 | 0.000172 | -1.0716  |
| J3KR55     | PTPN7    | 5778    | Tyrosine-protein phosphatase non-receptor type 7 (Fragmen   | S125     | 100       | RLQRRGSSVALMDD   | R           | E         | 0.272025  | 0.20089   | 0.221338  | 0.142291 | 0.08802  | 0.116301 | 0.115537 | 0.231418     | 0.49926  | 0.709121 | 0.011664 | -1.00214 |
| G3V4K3     | VIPA539  | 63894   | Spermatogenesis-defective protein 39 homolog                | T143     | 33.17     | SSFFRGTRPFGGQSS  | R           | F         | 0.221562  | 0.302332  | 0.209497  | 0.124721 | 0.06514  | 0.128676 | 0.244464 | 0.434334     | 0.664256 | 0.017874 | 0.120312 | -1.20312 |
| Q9Y2L6     | FRMD4B   | 23150   | FERM domain-containing protein 4B                           | S628     | 91.79     | RIHFRRKSSINQEVDF | R           | F         | 0.223012  | 0.176394  | 0.195117  | 0.129583 | 0.117093 | 0.117905 | 0.121527 | 0.198174     | 0.613233 | 0.163037 | 0.005604 | -0.70549 |
| P35611     | ADD1     | 118     | Alpha-adducin                                               | S726     | 99.76     | KKKFRTPSFLKSSKK  | R           | F         | 0.217818  | 0.281647  | 0.20581   | 0.134087 | 0.092382 | 0.148305 | 0.124925 | 0.235092     | 0.531387 | 0.674135 | 0.018917 | -0.91217 |
| Q9YUE8     | ADD3     | 120     | Gamma-adducin                                               | S693     | 99.76     | KKKFRTPSFLKSSKK  | R           | F         | 0.240041  | 0.30014   | 0.240555  | 0.101096 | 0.075356 | 0.120157 | 0.098869 | 0.260245     | 0.379909 | 0.594971 | 0.002469 | -1.39628 |
| P51812     | RP56KA3  | 6197    | Ribosomal protein S6 kinase alpha-3                         | S386     | 100       | HQLFRGFSFVAITSD  | R           | F         | 0.208358  | 0.260998  | 0.254823  | 0.159661 | 0.10406  | 0.135579 | 0.1331   | 0.241393     | 0.551383 | 0.968515 | 0.009439 | -0.85887 |
| Q15418     | RP56KA1  | 6195    | Ribosomal protein S6 kinase alpha-1                         | S380     | 100       | HQLFRGFSFVAITGLM | R           | F         | 0.231086  | 0.246596  | 0.213559  | 0.105602 | 0.070786 | 0.106985 | 0.094457 | 0.230414     | 0.409946 | 0.787396 | 0.000866 | -1.28649 |
| Q92576     | PHF3     | 23469   | PHD finger protein 3                                        | S1578    | 98.96     | VHFFRRGSAVATSHF  | R           | F         | 0.214591  | 0.215017  | 0.221775  | 0.13198  | 0.115355 | 0.14327  | 0.130202 | 0.217128     | 0.599655 | 0.152126 | 0.0005   | -0.73779 |
| Q14289     | PTK2B    | 2185    | Protein-tyrosine kinase 2-beta                              | S778     | 100       | HNVFRGSRRAVEEDFI | K           | F         | 0.253528  | 0.194408  | 0.173386  | 0.105871 | 0.133312 | 0.113626 | 0.117603 | 0.207108     | 0.567836 | 0.20772  | 0.024192 | -0.81645 |
| Q75044     | SRGAP2   | 23380   | SLIT-ROBO Rho GTPase-activating protein 2                   | S930     | 100       | ATAGRSKSNHNNRPF  | R           | G         | 0.183115  | 0.236266  | 0.206155  | 0.130061 | 0.124038 | 0.141043 | 0.131714 | 0.208512     | 0.631684 | 0.189473 | 0.008982 | -0.66272 |
| O15042     | RAB3GAP1 | 22930   | Rab3 GTPase-activating protein catalytic subunit            | S537     | 91.48     | RDEGGKTKSASDVNTI | K           | G         | 0.228813  | 0.202501  | 0.225999  | 0.109645 | 0.160837 | 0.131014 | 0.133832 | 0.219104     | 0.616814 | 0.479917 | 0.007449 | -0.7112  |
| Q9UKV3     | ACIN1    | 22985   | Apoptotic chromatin condensation inducer in the nucleus     | S561     | 91.37     | QKEGRRASHTLLPSH  | R           | G         | 0.263402  | 0.260698  | 0.252423  | 0.147287 | 0.171285 | 0.144296 | 0.154289 | 0.258841     | 0.596077 | 0.260116 | 0.000336 | -0.74643 |
| Q9NQ78     | KIF13B   | 23303   | Kinesin-like protein KIF13B                                 | S1410    | 100       | SNKGRWESQQDVSQT  | R           | G         | 0.203036  | 0.198736  | 0.136729  | 0.119957 | 0.093431 | 0.077408 | 0.096932 | 0.179501     | 0.54001  | 0.502369 | 0.02896  | -0.88894 |
| H0Y4E8     | SIK3     | 23387   | Serine/threonine-protein kinase SIK3 (Fragment)             | S545     | 100       | GPLGRASDGGANIQ   | R           | G         | 0.193131  | 0.217198  | 0.161077  | 0.136532 | 0.098729 | 0.116841 | 0.117367 | 0.190469     | 0.616203 | 0.621589 | 0.020237 | -0.69852 |
| P19634     | SLC9A1   | 6548    | Sodium/hydrogen exchanger 1                                 | S599     | 48.05     | GMGKIPSAVSTVMS   | K           | G         | 0.23596   | 0.19943   | 0.220641  | 0.144553 | 0.146898 | 0.107157 | 0.132869 | 0.218677     | 0.607606 | 0.807243 | 0.006757 | -0.71879 |
| Q66K74     | MAP15    | 55201   | Microtubule-associated protein 15                           | S472     | 100       | EGPGRASKEVSGSR   | R           | G         | 0.198262  | 0.20267   | 0.199568  | 0.118171 | 0.113405 | 0.146159 | 0.125912 | 0.200167     | 0.629035 | 0.032227 | 0.017129 | -0.66879 |
| F5H269     | DMXL1    | 1657    | DM-X-like protein 1                                         | S324     | 100       | FRGRRRSLLALVHT   | R           | G         | 0.197372  | 0.2254    | 0.197043  | 0.156231 | 0.146157 | 0.128691 | 0.143693 | 0.206605     | 0.695497 | 0.845793 | 0.007054 | -0.52388 |
| Q9UBP0     | SPAST    | 6683    | Spastin                                                     | S268     | 33.33     | SGHHRRAPSVYSLSMT | R           | H         | 0.223007  | 0.188678  | 0.197913  | 0.106011 | 0.114809 | 0.159327 | 0.126716 | 0.203199     | 0.623603 | 0.5573   | 0.017012 | -0.6813  |
| Q9UPW6     | SATB2    | 23314   | DNA-binding protein SATB2                                   | S587     | 85.69     | QVLLHRQQSQPAKES  | R           | H         | 0.148888  | 0.155684  | 0.144236  | 0.115039 | 0.112062 | 0.096601 | 0.107901 | 0.149602     | 0.721248 | 0.505528 | 0.00323  | -0.47143 |
| H8Y6P7     | GCOM1    | 145781  | GRINL1A combined protein 15                                 | S576     | 93.49     | HPRHRVSSQAEDTSS  | R           | H         | 0.190337  | 0.176902  | 0.187606  | 0.138161 | 0.09868  | 0.131434 | 0.122758 | 0.184948     | 0.663744 | 0.203095 | 0.008437 | -0.5913  |
| Q8I2Q1     | WDFY3    | 23001   | WD repeat and FYVE domain-containing protein 3              | S970     | 47.74     | YRVHKKPSLSLYEPM  | K           |           |           |           |           |          |          |          |          |              |          |          |          |          |

|            |           |           |                                                              |       |       |                   |     |   |          |          |          |          |          |          |          |          |          |          |          |          |
|------------|-----------|-----------|--------------------------------------------------------------|-------|-------|-------------------|-----|---|----------|----------|----------|----------|----------|----------|----------|----------|----------|----------|----------|----------|
| Q81WC1     | MAP7D3    | 79649     | MAP7 domain-containing protein 3                             | S185  | 49.62 | TANKRSASTEKLEQG   | R   | K | 0.208418 | 0.268522 | 0.28701  | 0.136881 | 0.148602 | 0.161319 | 0.148934 | 0.25465  | 0.584858 | 0.16256  | 0.012938 | -0.77384 |
| Q81YM9     | TRIM22    | 10346     | E3 ubiquitin-protein ligase TRIM22                           | S384  | 50    | SLNKRKSSGFADFPD   | R   | K | 0.3248   | 0.24327  | 0.193978 | 0.067355 | 0.075789 | 0.064534 | 0.069286 | 0.254016 | 0.272762 | 0.015445 | 0.03917  | -1.87429 |
| Q15691     | MAPRE1    | 22919     | Microtubule-associated protein RP/EB family member 1         | T154  | 94.17 | NKPKKPLTSSSSAAPQ  | K   | K | 0.333729 | 0.258126 | 0.260559 | 0.094459 | 0.089856 | 0.066622 | 0.083646 | 0.284138 | 0.294384 | 0.215274 | 0.00158  | -1.76423 |
| Q9Y4H2     | IRS2      | 8660      | Insulin receptor substrate 2                                 | S1174 | 91.64 | HNPKRKLNSAVENVS   | R   | K | 0.174921 | 0.180001 | 0.206455 | 0.11555  | 0.089499 | 0.12613  | 0.110393 | 0.187126 | 0.58994  | 0.892948 | 0.006319 | -0.76136 |
| Q6PKG0     | LARP1     | 23367     | La-related protein 1                                         | S1056 | 66.03 | EGGKRCCPSQSSSRPA  | R   | K | 0.213126 | 0.230448 | 0.207443 | 0.129167 | 0.101732 | 0.121682 | 0.117527 | 0.217006 | 0.541584 | 0.833104 | 0.00075  | -0.88474 |
| Q9H8G2     | CAAP1     | 79886     | Caspase activity and apoptosis inhibitor 1                   | T90   | 49.99 | ERRKRRKSTGSSSVRG  | R   | K | 0.240792 | 0.282665 | 0.269896 | 0.197801 | 0.163585 | 0.169473 | 0.176953 | 0.264451 | 0.669134 | 0.841648 | 0.005791 | -0.57963 |
| Q13546     | RIPK1     | 8737      | Receptor-interacting serine/threonine-protein kinase 1       | S320  | 50    | AVVKRQMSQLDLCVA   | R   | K | 0.245522 | 0.226813 | 0.197405 | 0.111866 | 0.086259 | 0.130806 | 0.109644 | 0.223247 | 0.491132 | 0.91863  | 0.003967 | -1.02582 |
| POCG40     | SP9       | 100131390 | Transcription factor Sp9                                     | S525  | 91.43 | HPFKRRSSSSCNLGGSR | R   | K | 0.356067 | 0.431878 | 0.280711 | 0.202205 | 0.12931  | 0.135819 | 0.155778 | 0.356219 | 0.43731  | 0.443369 | 0.015447 | -1.19327 |
| Q9BWH6     | RPAP1     | 26015     | RNA polymerase II-associated protein 1                       | S266  | 49.47 | VAFRLRSRSHSTQEQTG | R   | L | 0.144008 | 0.174841 | 0.165186 | 0.076219 | 0.078249 | 0.07529  | 0.076586 | 0.161345 | 0.474673 | 0.018247 | 0.010799 | -1.07499 |
| P36915     | GNL1      | 2794      | Guanine nucleotide-binding protein-like 1                    | S34   | 47.38 | QDGLRSSNSRSRSGSR  | R   | L | 0.224898 | 0.253023 | 0.179258 | 0.134524 | 0.117366 | 0.09497  | 0.11562  | 0.21906  | 0.5278   | 0.442227 | 0.013185 | -0.92194 |
| AOA180GTL5 | RAB11FIP5 | 26056     | Rab11 family-interacting protein 5                           | S244  | 32.95 | RNKLRRKSSLTQSNTS  | R   | L | 0.255092 | 0.281192 | 0.264223 | 0.174002 | 0.15559  | 0.177616 | 0.169069 | 0.266836 | 0.633609 | 0.886064 | 0.006674 | -0.65833 |
| Q14738     | PPP2R5D   | 5528      | Serine/threonine-protein phosphatase 2A 56 kDa regulatory    | S573  | 100   | KVLLRRKSELQPDVY   | R   | L | 0.237683 | 0.222536 | 0.190844 | 0.128357 | 0.132225 | 0.109618 | 0.1234   | 0.217021 | 0.568608 | 0.40755  | 0.003758 | -0.81449 |
| Q4KMQ2     | ANO6      | 196527    | Anoctamin-6                                                  | S909  | 100   | DNNLRPKSE         | R   | L | 0.216957 | 0.187183 | 0.188675 | 0.10305  | 0.121291 | 0.112888 | 0.11241  | 0.197605 | 0.56886  | 0.45701  | 0.001511 | -0.81385 |
| Q8WW11     | LMO7      | 4008      | LIM domain only protein 7                                    | S1197 | 97.74 | LKNLRRKSSQFGQGS   | K   | L | 0.276331 | 0.272125 | 0.246908 | 0.141083 | 0.15238  | 0.152816 | 0.148759 | 0.265121 | 0.5611   | 0.29748  | 0.000307 | -0.83367 |
| Q92H25     | RASSF4    | 83937     | Ras association domain-containing protein 4                  | S98   | 45.87 | SOPLKEPSPQFNQIT   | K   | L | 0.241253 | 0.21501  | 0.21661  | 0.158773 | 0.144865 | 0.107433 | 0.137024 | 0.161019 | 0.469716 | 0.007601 | -0.71095 |          |
| Q13370     | PDE3B     | 5140      | cGMP-inhibited 3',5'-cyclic phosphodiesterase B              | S442  | 82.1  | TPQLRRSSGTGSLLP   | R   | L | 0.276308 | 0.214409 | 0.28606  | 0.166437 | 0.146616 | 0.148623 | 0.153892 | 0.258926 | 0.594349 | 0.146142 | 0.010763 | -0.75062 |
| Q9618      | LRCH3     | 84859     | Leucine-rich repeat and calponin homology domain-containi    | S352  | 99.49 | EQRLRRSSTGQENRQ   | R   | L | 0.254871 | 0.203955 | 0.194637 | 0.139658 | 0.078311 | 0.109118 | 0.108969 | 0.217821 | 0.500268 | 0.947523 | 0.013496 | -0.99923 |
| P9275      | RP56      | 6136      | 40S ribosomal protein S6                                     | T241  | 31.88 | LSSLRSTSKSSSESR   | R   | L | 0.173775 | 0.168682 | 0.203123 | 0.107669 | 0.123129 | 0.129505 | 0.120101 | 0.18186  | 0.660406 | 0.534639 | 0.007898 | -0.59858 |
| Q9BVI6     | UTP14A    | 10813     | U3 small nucleolar RNA-associated protein 14 homolog A       | S434  | 50    | RNSLRKSSSELQSDAE  | R   | L | 0.226511 | 0.247852 | 0.2952   | 0.122006 | 0.164575 | 0.126099 | 0.13756  | 0.256521 | 0.536253 | 0.617124 | 0.008198 | -0.89901 |
| Q96QT4     | TRPM7     | 54822     | Transient receptor potential cation channel subfamily M me   | S1476 | 50    | ENTLRRKSSLAGLFTD  | K   | L | 0.259977 | 0.274234 | 0.214235 | 0.14573  | 0.066761 | 0.11895  | 0.11048  | 0.249482 | 0.442839 | 0.757167 | 0.009132 | -1.17515 |
| Q9UKL3     | CASP8A2   | 9994      | CASP8-associated protein 2                                   | S875  | 100   | AKVLRNESPFPQVPIY  | R   | L | 0.179134 | 0.162878 | 0.177325 | 0.069834 | 0.093325 | 0.070185 | 0.077781 | 0.173112 | 0.449311 | 0.609147 | 0.000515 | -1.15421 |
| Q75592     | MYCBP2    | 23077     | E3 ubiquitin-protein ligase MYCBP2                           | S3426 | 33.3  | MVRLRSTSVVAPVYI   | R   | L | 0.181932 | 0.220304 | 0.182338 | 0.112736 | 0.077143 | 0.133752 | 0.107877 | 0.194858 | 0.553618 | 0.744584 | 0.014018 | -0.85304 |
| Q81YM9     | TRIM22    | 10346     | E3 ubiquitin-protein ligase TRIM22                           | S383  | 50    | SSLNKRKSSGFADFPD  | K   | N | 0.3248   | 0.24327  | 0.193978 | 0.067355 | 0.075789 | 0.064534 | 0.069286 | 0.254016 | 0.272762 | 0.015445 | 0.03917  | -1.87429 |
| Q9Y6G9     | DYNC1L11  | 51143     | Cytoplasmic dynein 1 light intermediate chain 1              | S414  | 33.33 | RTPNRSVSSVAVSR    | R   | N | 0.225276 | 0.235713 | 0.179203 | 0.114217 | 0.082508 | 0.122009 | 0.106245 | 0.213397 | 0.497872 | 0.652432 | 0.007149 | -1.06615 |
| Q75113     | N4BP1     | 9683      | NEDD4-binding protein 1                                      | T242  | 98.65 | EARNKAGTVPSELTK   | K   | N | 0.217445 | 0.196353 | 0.234766 | 0.146485 | 0.139933 | 0.157981 | 0.148133 | 0.216188 | 0.685205 | 0.368081 | 0.005208 | -0.54539 |
| Q9Y712     | PIKFYVE   | 200576    | 1-phosphatidylinositol 3-phosphate 5-kinase                  | S307  | 99.96 | PARNRSTQNLGLD     | R   | N | 0.221089 | 0.19899  | 0.175269 | 0.143732 | 0.102467 | 0.132967 | 0.126389 | 0.198616 | 0.636346 | 0.942951 | 0.015955 | -0.65212 |
| P37802     | TAGLN2    | 8407      | Transglutinin-2                                              | S185  | 94.95 | MGNTRNGASQMGTYR   | R   | N | 0.295606 | 0.217412 | 0.252337 | 0.143969 | 0.092711 | 0.120786 | 0.119155 | 0.255118 | 0.467058 | 0.600992 | 0.007341 | -1.09833 |
| Q58A45     | PAN3      | 255967    | PAN2-PAN3 deadenylation complex subunit PAN3                 | S361  | 49.49 | SPAPRRRSHTPNFAS   | .AI | R | 0.295305 | 0.280826 | 0.217181 | 0.1618   | 0.168139 | 0.133919 | 0.154619 | 0.264437 | 0.584711 | 0.321971 | 0.013783 | -0.77421 |
| Q58A45     | PAN3      | 255967    | PAN2-PAN3 deadenylation complex subunit PAN3                 | T363  | 49.49 | SPAPRRRSHTPNFAS   | .AI | R | 0.295305 | 0.280826 | 0.217181 | 0.1618   | 0.168139 | 0.133919 | 0.154619 | 0.264437 | 0.584711 | 0.321971 | 0.013783 | -0.77421 |
| Q96PY5     | FMNL2     | 1146793   | Formin-like protein 2                                        | S1018 | 50    | QDDPKRSPHSSKQKQ   | K   | P | 0.204528 | 0.221581 | 0.247338 | 0.110158 | 0.146194 | 0.109303 | 0.121885 | 0.224482 | 0.542962 | 0.976738 | 0.004138 | -0.88108 |
| Q07352     | ZFP36L1   | 677       | mRNA decay activator protein ZFP36L1                         | S54   | 100   | GGFPRRHVSSTLCPSSK | R   | P | 0.281848 | 0.273619 | 0.195127 | 0.098366 | 0.07359  | 0.070879 | 0.080945 | 0.250198 | 0.325233 | 0.182037 | 0.00429  | -1.62806 |
| Q95685     | PPP1R3D   | 5509      | Protein phosphatase 1 regulatory subunit 3D                  | S25   | 50    | KLGRPSLSLCLSDLDG  | R   | P | 0.239278 | 0.286636 | 0.227398 | 0.151626 | 0.133668 | 0.137232 | 0.140842 | 0.251104 | 0.560893 | 0.16856  | 0.004309 | -0.8342  |
| Q9Y6M5     | SLC30A1   | 7779      | Zinc transporter 1                                           | S167  | 44.52 | FKGPRVKSSTRGGSD   | R   | P | 0.1743   | 0.1851   | 0.165012 | 0.077948 | 0.110352 | 0.125984 | 0.104761 | 0.174804 | 0.599307 | 0.288228 | 0.010177 | -0.73863 |
| Q8TD55     | PLEKHO2   | 80301     | Pleckstrin homology domain-containing family O member 2      | S390  | 50    | QFPHRCSSLDGLLGE   | R   | P | 0.185667 | 0.186115 | 0.160486 | 0.107286 | 0.10649  | 0.112396 | 0.108724 | 0.177423 | 0.612796 | 0.009129 | 0.001372 | -0.70652 |
| Q0IRZ9     | FCHO2     | 115548    | F-BAR domain only protein 2                                  | S488  | 100   | NEIPLRPPSPPVTSNT  | .PI | R | 0.185229 | 0.175848 | 0.193138 | 0.121554 | 0.134371 | 0.122265 | 0.126063 | 0.184738 | 0.682389 | 0.818448 | 0.008835 | -0.55133 |
| I3L4C2     | BAIAP2    | 10458     | Brain-specific angiogenesis inhibitor 1-associated protein 2 | S399  | 99.47 | KTLPRRSHMAAGLER   | R   | P | 0.259799 | 0.230169 | 0.226263 | 0.153413 | 0.125835 | 0.126435 | 0.135228 | 0.238766 | 0.566361 | 0.850345 | 0.001758 | -0.8202  |
| Q53E70     | CRTC2     | 200186    | CREB-regulated transcription coactivator 2                   | S456  | 99.92 | QQLPKQSPPTMSPTL   | K   | P | 0.284837 | 0.30308  | 0.229656 | 0.158109 | 0.086184 | 0.193118 | 0.145804 | 0.272524 | 0.535011 | 0.659249 | 0.300309 | -0.90236 |
| Q9NXD2     | MTMR10    | 54893     | Myotubularin-related protein 10                              | S607  | 100   | ELLPRRNSLCLPKPP   | R   | P | 0.191332 | 0.220295 | 0.193842 | 0.141891 | 0.127001 | 0.149486 | 0.139459 | 0.201823 | 0.690998 | 0.673848 | 0.005393 | -0.53325 |
| Q9H2L5     | RASSF4    | 83937     | Ras association domain-containing protein 4                  | S91   | 45.87 | SWMERRRSPHLLKPPS  | R   | P | 0.241253 | 0.21501  | 0.21661  | 0.158773 | 0.144865 | 0.107433 | 0.137024 | 0.242921 | 0.610919 | 0.469716 | 0.007601 | -0.71095 |
| P19878     | NC2F      | 4688      | Neutrophil cytosol factor 2                                  | T233  | 100   | EPFPRRPTPEIFRAL   | R   | P | 0.228855 | 0.178631 | 0.161913 | 0.08051  | 0.11012  | 0.097531 | 0.096054 | 0.1898   | 0.50608  | 0.307838 | 0.012778 | -0.98256 |
| Q92793     | CREBBP    | 1387      | CREB-binding protein                                         | S2063 | 50    | VQFPFRISPSALQDL   | R   | P | 0.200681 | 0.219626 | 0.193085 | 0.125487 | 0.087804 | 0.12029  | 0.111194 | 0.204464 | 0.543831 | 0.618766 | 0.002771 | -0.87877 |
| Q99570     | PIK3R4    | 30849     | Phosphoinositide 3-kinase regulatory subunit 4               | S894  | 47.94 | KGPFPRSESSAGICVP  | R   | P | 0.156227 | 0.184875 | 0.15956  | 0.106462 | 0.099361 | 0.117149 | 0.107658 | 0.166887 | 0.645092 | 0.492455 | 0.004726 | -0.63242 |
| P11177     | EPB41     | 2035      | Protein 4.1                                                  | S560  | 84.68 | DRSPRPPTSPAPITQQ  | R   | P | 0.156316 | 0.205425 | 0.192606 | 0.103345 | 0.080929 | 0.106232 | 0.096835 | 0.184783 | 0.520449 | 0.456413 | 0.006281 | -0.93223 |
| Q7Z589     | EMSY      | 56946     | BRCA2-interacting transcriptional repressor EMSY             | S173  | 99.12 | VKSPPRPASPAISVVA  | R   | P | 0.250995 | 0.217721 | 0.165791 | 0.122339 | 0.129951 | 0.109183 | 0.120491 | 0.211502 | 0.569691 | 0.112973 | 0.023464 | -0.81175 |
| Q9UIJ2     | RASAL2    | 9462      | Ras GTPase-activating protein nGAP                           | S16   | 88.3  | ERSPPRRRISGVSTYS  | R   | P | 0.216746 | 0.243386 | 0.196313 | 0.151458 | 0.126837 | 0.140745 | 0.13968  | 0.218815 | 0.638346 | 0.429567 | 0.006765 | -0.64759 |
| Q75592     | MYCBP2    | 23077     | E3 ubiquitin-protein ligase MYCBP2                           | S3478 | 85.8  | TVQKRSYVSGTSESR   | R   | P | 0.216704 | 0.220839 | 0.201866 | 0.142636 | 0.092471 | 0.11402  | 0.116376 | 0.213136 | 0.546015 | 0.217653 | 0.003346 | -0.87299 |
| Q9UIF9     | BAZZA     | 11176     | Bromodomain adjacent to zinc finger domain protein 2A        | S1747 | 90.22 | KRQQRKRSGLSNLFS   | K   | Q | 0.228166 | 0.225343 | 0.215449 | 0.150798 | 0.155822 | 0.112017 | 0.139546 | 0.222986 | 0.625806 | 0.144017 | 0.004374 | -0.67621 |
| Q9C011     | MTMR12    | 54545     | Myotubularin-related protein 12                              | S564  | 93.21 | FKHQQLSLPLDQSK    | R   | Q | 0.234002 | 0.244652 | 0.194124 | 0.168072 | 0.110829 | 0.135511 | 0.138137 | 0.22426  | 0.61597  | 0.925093 | 0.018659 | -0.69907 |
| Q9UHB7     | AFF4      | 27125     | AF4/FMR2 family member 4                                     | S212  | 87.96 | KEHQRSKSPROPDAN   | R   | Q | 0.183069 | 0.201065 | 0.196062 | 0.10288  | 0.145138 | 0.119226 | 0.122415 | 0.193399 | 0.632965 | 0.319347 | 0.006132 | -0.6598  |
| AOA0U1RR27 | DENND4A   | 10260     | C-myc promoter-binding protein                               | S1195 | 94.47 | KRIQRMMNSFSVFKPF  | R   | Q | 0.306535 | 0.260425 | 0.190721 | 0.100443 | 0.061101 | 0.092479 | 0.084674 | 0.252561 | 0.335264 | 0.225788 | 0.009327 | -1.57663 |
| Q43491     | EPB41L2   | 2037      | Band 4.1-like protein 2                                      | T89   | 33.33 | LKQKRSYTLVWAKDG   | K   | Q | 0.247645 | 0.263422 | 0.122647 | 0.166238 | 0.13184  | 0.129165 |          |          |          |          |          |          |

|             |            |           |                                                           |       |       |                  |   |   |          |          |          |          |          |          |          |          |          |          |          |          |
|-------------|------------|-----------|-----------------------------------------------------------|-------|-------|------------------|---|---|----------|----------|----------|----------|----------|----------|----------|----------|----------|----------|----------|----------|
| Q14974      | PPP1R12A   | 4659      | Protein phosphatase 1 regulatory subunit 12A              | S507  | 48.66 | TIPRRLASTSDIEEK  | R | R | 0.233729 | 0.221557 | 0.168233 | 0.104398 | 0.079595 | 0.130668 | 0.104887 | 0.20784  | 0.504652 | 0.699199 | 0.014515 | -0.98664 |
| Q14149      | MORC3      | 23515     | MORC family CW-type zinc finger protein 3                 | S514  | 100   | SVPRRHLSSEGNYSYA | R | R | 0.274255 | 0.2254   | 0.219941 | 0.16805  | 0.150762 | 0.099147 | 0.13932  | 0.239865 | 0.580824 | 0.820755 | 0.020291 | -0.78383 |
| Q9NRY4      | ARHGAP35   | 2909      | Rho GTPase-activating protein 35                          | S1072 | 41.71 | DGQRKLSVSSFWPLPQ | K | R | 0.226249 | 0.241273 | 0.194327 | 0.147087 | 0.098982 | 0.136464 | 0.127511 | 0.220617 | 0.577976 | 0.947358 | 0.009811 | -0.79092 |
| P62753      | RPS6       | 6194      | 40S ribosomal protein S6                                  | S236  | 79.31 | AKRRRLSSLRASFTSK | R | R | 0.173775 | 0.168682 | 0.203123 | 0.107669 | 0.123129 | 0.129505 | 0.120101 | 0.18186  | 0.660406 | 0.534639 | 0.007898 | -0.59858 |
| Q13546      | RIPK1      | 8737      | Receptor-interacting serine/threonine-protein kinase 1    | S416  | 100   | EEERRRVSDHDFPAQQ | R | R | 0.269754 | 0.187206 | 0.222878 | 0.14794  | 0.142249 | 0.112717 | 0.134302 | 0.226613 | 0.592649 | 0.345177 | 0.024607 | -0.75475 |
| Q9H8G2      | CAAP1      | 79886     | Caspase activity and apoptosis inhibitor 1                | S89   | 49.99 | SERRRRSSIDSSSSVS | K | R | 0.240792 | 0.282665 | 0.269896 | 0.197801 | 0.163585 | 0.169473 | 0.176953 | 0.264451 | 0.669134 | 0.841648 | 0.005791 | -0.57963 |
| Q9UIF2      | RASAL2     | 9462      | Ras GTPase-activating protein nGAP                        | S18   | 37.68 | SPRRRSISGTSIEFK  | R | R | 0.220401 | 0.25019  | 0.265719 | 0.125718 | 0.129523 | 0.151959 | 0.135733 | 0.245437 | 0.553028 | 0.549799 | 0.02162  | -0.85458 |
| AOA096LPCS  | WASHC2C    | 253725    | WASH complex subunit 2C                                   | S478  | 94.33 | SKTRKRVQSTADIEGD | K | R | 0.198902 | 0.222969 | 0.221624 | 0.129463 | 0.136937 | 0.138133 | 0.134844 | 0.214498 | 0.628649 | 0.215544 | 0.000648 | -0.66967 |
| Q8IWS2      | SLITRK4    | 139065    | SLIT and NTRK-like protein 4                              | S741  | 92.41 | VDTRKRLSTIDELDE  | K | R | 0.223515 | 0.296092 | 0.240019 | 0.168566 | 0.117484 | 0.153312 | 0.146454 | 0.253209 | 0.578393 | 0.644161 | 0.016106 | -0.78988 |
| O60493      | SNX3       | 8724      | Sorting nexin-3                                           | S72   | 99.75 | STVRRRYSDFEWLRS  | R | R | 0.230664 | 0.22501  | 0.201001 | 0.142477 | 0.145121 | 0.148739 | 0.145446 | 0.218891 | 0.664465 | 0.076622 | 0.001375 | -0.58974 |
| J3KQ70      | INO80B-WBI | 100532735 | HCG2039827, isoform CRA_e                                 | T10   | 45.65 | KLWRRGTSFGAMEAP  | R | R | 0.193997 | 0.203499 | 0.190894 | 0.120533 | 0.099393 | 0.107757 | 0.109228 | 0.19613  | 0.556916 | 0.551307 | 0.000273 | -0.84447 |
| Q5J8M3      | EMC4       | 51234     | ER membrane protein complex subunit 4                     | S32   | 99.49 | GGGSRGRSDRGSGQG  | R | S | 0.216867 | 0.186843 | 0.280095 | 0.103913 | 0.155591 | 0.147196 | 0.135567 | 0.227935 | 0.59476  | 0.506811 | 0.043938 | -0.74962 |
| Q9GZY6      | LAT2       | 7462      | Linker for activation of T-cells family member 2          | S106  | 100   | SKGSRHSEEAAYIDP  | R | S | 0.21097  | 0.204335 | 0.210385 | 0.117343 | 0.107612 | 0.13705  | 0.120668 | 0.208563 | 0.578569 | 0.113201 | 0.000594 | -0.78944 |
| Q93073      | SECISBP2L  | 9728      | Selenocysteine insertion sequence-binding protein 2-like  | S851  | 91.69 | MGHSRNPSSAASAI5F | R | S | 0.24504  | 0.236214 | 0.198936 | 0.138115 | 0.156286 | 0.149097 | 0.147832 | 0.22673  | 0.562019 | 0.245375 | 0.006381 | -0.61701 |
| Q8N1G0      | ZNF687     | 57592     | Zinc finger protein 687                                   | S495  | 93.18 | TVISRTQSSLVEAFN  | R | S | 0.242127 | 0.276941 | 0.185281 | 0.115947 | 0.146368 | 0.157156 | 0.139824 | 0.234783 | 0.595245 | 0.35162  | 0.032062 | -0.74772 |
| P38398      | BRCA1      | 672       | Breast cancer type 1 susceptibility protein               | S1191 | 44.96 | GELSRSPSPFPTHSL  | R | S | 0.313217 | 0.274203 | 0.320961 | 0.214063 | 0.209797 | 0.223055 | 0.215638 | 0.302793 | 0.712163 | 0.135951 | 0.004353 | -0.48972 |
| Q12802      | AKAP13     | 11214     | A-kinase anchor protein 13                                | S1906 | 93.63 | VLSLKSIVSQINITGV | K | S | 0.295244 | 0.269354 | 0.178834 | 0.130413 | 0.095334 | 0.113667 | 0.113138 | 0.247811 | 0.45655  | 0.152264 | 0.021426 | -1.13116 |
| Q9HC35      | EML4       | 27436     | Echinoderm microtubule-associated protein-like 4          | S200  | 96.44 | NKLSKIPSPFKLIPK  | K | S | 0.151971 | 0.25391  | 0.249095 | 0.110773 | 0.07557  | 0.13879  | 0.108377 | 0.218325 | 0.496404 | 0.465503 | 0.044107 | -1.01041 |
| Q9P013      | CWC15      | 51503     | Spliceosome-associated protein CWC15 homolog              | S31   | 33.33 | SQLSKQYSRDLPSH   | K | S | 0.342174 | 0.363986 | 0.17142  | 0.125364 | 0.062446 | 0.065897 | 0.084569 | 0.292527 | 0.289098 | 0.202282 | 0.031719 | -1.79037 |
| O75420      | GIGYF1     | 64599     | GRB10-interacting GYF protein 1                           | S638  | 99.91 | PTMSRSLVSPDSGRLL | R | S | 0.246249 | 0.27595  | 0.278388 | 0.132308 | 0.135068 | 0.150899 | 0.139425 | 0.266862 | 0.522459 | 0.478349 | 0.000423 | -0.93661 |
| Q86YV5      | PRAG1      | 157285    | Inactive tyrosine-protein kinase PRAG1                    | S696  | 50    | TGMSKASAFEFPPK   | K | S | 0.267225 | 0.261518 | 0.203607 | 0.16946  | 0.106703 | 0.167204 | 0.147789 | 0.244116 | 0.605403 | 0.988682 | 0.290932 | -0.72403 |
| O75427      | LRCH4      | 4034      | Leucine-rich repeat and calponin homology domain-containi | S279  | 87.41 | LAPSRPFPSFPCPAE  | R | S | 0.374494 | 0.446008 | 0.393136 | 0.168889 | 0.144068 | 0.153984 | 0.155647 | 0.404546 | 0.384745 | 0.20374  | 0.000386 | -1.37802 |
| M0QZ13      | FCHO1      | 23149     | F-BAR domain only protein 1                               | S577  | 99.97 | RLRSRVSQPISTRSN  | R | S | 0.150103 | 0.189877 | 0.172564 | 0.111072 | 0.061725 | 0.115166 | 0.095988 | 0.170848 | 0.561829 | 0.602064 | 0.02234  | -0.8318  |
| P42345      | MTOR       | 2475      | Serine/threonine-protein kinase mTOR                      | T2446 | 33.32 | NKRSRTRTDSYSAGV  | R | S | 0.237796 | 0.188268 | 0.227076 | 0.160424 | 0.12466  | 0.115237 | 0.13344  | 0.217713 | 0.612918 | 0.91123  | 0.014458 | -0.70623 |
| Q15910      | EZH2       | 2146      | Histone-lysine N-methyltransferase EZH2                   | T367  | 78.41 | NNSRSPSTPIINLLE  | R | S | 0.350476 | 0.291905 | 0.27765  | 0.128822 | 0.191605 | 0.169664 | 0.163355 | 0.306677 | 0.532663 | 0.810554 | 0.007705 | -0.9087  |
| Q16204      | CCDC6      | 8030      | Coiled-coil domain-containing protein 6                   | S367  | 97.39 | PSSSRPSTPGLSYA   | R | S | 0.248602 | 0.247118 | 0.287195 | 0.125747 | 0.073156 | 0.119001 | 0.105968 | 0.260972 | 0.406052 | 0.773399 | 0.001827 | -1.30026 |
| AOA087WTT2  | TMEM230    | 29058     | Transmembrane protein 230                                 | S24   | 32.81 | VKYSLRSLSDDDGYID | R | S | 0.178482 | 0.244887 | 0.179319 | 0.11008  | 0.098079 | 0.142562 | 0.116907 | 0.581926 | 0.534659 | 0.03084  | -0.78109 |          |
| Q99459      | CDC5L      | 988       | Cell division cycle 5-like protein                        | S293  | 100   | SEPTKKRSKLVLPAP  | K | T | 0.353733 | 0.302641 | 0.376271 | 0.213456 | 0.164471 | 0.169142 | 0.182356 | 0.344215 | 0.529774 | 0.678563 | 0.003788 | -0.91655 |
| Q96BH1      | RNF25      | 64320     | E3 ubiquitin-protein ligase RNF25                         | S450  | 100   | RPGRTRRSLEGLSEKD | R | T | 0.313976 | 0.24776  | 0.280407 | 0.13546  | 0.126691 | 0.133396 | 0.131849 | 0.280715 | 0.469691 | 0.037626 | 0.014719 | -1.09021 |
| Q12968      | NFATC3     | 4775      | Nuclear factor of activated T-cells, cytoplasmic 3        | S344  | 96.48 | PLKTRKTSDEQAAIL  | R | T | 0.220739 | 0.204371 | 0.211891 | 0.108567 | 0.12431  | 0.120574 | 0.117817 | 0.212334 | 0.554869 | 0.99606  | 0.000147 | -0.84978 |
| E9PFN4      | SLC4A7     | 9497      | Anion exchange protein                                    | S19   | 50    | PLLTRVTSRSGPDEEA | R | T | 0.184801 | 0.195716 | 0.158877 | 0.118838 | 0.082693 | 0.120251 | 0.107261 | 0.179798 | 0.596563 | 0.882736 | 0.111591 | -0.74525 |
| J3KQR7      | CEP170B    | 283638    | Centrosomal protein of 170 kDa protein B                  | S1115 | 49.74 | QALTRNSLSLTPRPT  | R | T | 0.229577 | 0.197091 | 0.224622 | 0.152669 | 0.10846  | 0.117421 | 0.126183 | 0.217096 | 0.581231 | 0.718616 | 0.005718 | -0.78282 |
| O15014      | ZNF609     | 23060     | Zinc finger protein 609                                   | S1055 | 92.67 | PLTKAPSLTDLVKS   | K | T | 0.245623 | 0.245678 | 0.230924 | 0.153156 | 0.150056 | 0.194792 | 0.166002 | 0.240741 | 0.689543 | 0.207627 | 0.080011 | -0.53629 |
| Q9NRA8      | EIF4ENIF1  | 56478     | Eukaryotic translation initiation factor 4E transporter   | S577  | 50    | VFQTRAAADYLRPR   | R | T | 0.177434 | 0.222815 | 0.188038 | 0.111389 | 0.060311 | 0.121247 | 0.097649 | 0.196096 | 0.497965 | 0.690007 | 0.013488 | -1.00588 |
| G3V4K3      | VIPAS39    | 63894     | Spermatogenesis-defective protein 39 homolog              | S147  | 99.97 | RGTRRPGSFQSLSDA  | R | T | 0.227351 | 0.309296 | 0.224519 | 0.13875  | 0.096639 | 0.13612  | 0.123836 | 0.253722 | 0.488079 | 0.387154 | 0.013742 | -1.03481 |
| P42345      | MTOR       | 2475      | Serine/threonine-protein kinase mTOR                      | S2448 | 33.32 | RSRTRDYSYAGQSV   | R | T | 0.237796 | 0.188268 | 0.227076 | 0.160424 | 0.12466  | 0.115237 | 0.13344  | 0.217713 | 0.612918 | 0.91123  | 0.014458 | -0.70623 |
| Q724V5      | HDGFL2     | 84717     | Hepatitis-derived growth factor-related protein 2         | S454  | 99.96 | VERTTKRSEGFSDMR  | R | T | 0.196439 | 0.212276 | 0.190168 | 0.112001 | 0.10586  | 0.112465 | 0.110109 | 0.199628 | 0.551571 | 0.189527 | 0.000205 | -0.85838 |
| Q92608      | DOCK2      | 1794      | Dedicator of cytokinesis protein 2                        | S1706 | 97.33 | KKRTRKRSVFAVDEK  | K | T | 0.237292 | 0.197196 | 0.216908 | 0.137466 | 0.100733 | 0.136965 | 0.125055 | 0.217132 | 0.575939 | 0.950609 | 0.005384 | -0.79601 |
| P23284      | PIIB       | 5479      | Peptidyl-prolyl cis-trans isomerase B                     | S189  | 89.25 | VESTKTDSDRDKPLDK | K | T | 0.140664 | 0.160231 | 0.19266  | 0.063756 | 0.103032 | 0.110587 | 0.092458 | 0.164518 | 0.561995 | 0.956473 | 0.026464 | -0.83137 |
| P34910      | EVI2B      | 2124      | Protein EVI2B                                             | S268  | 93.03 | EISTKRTSISLTPW   | K | T | 0.325091 | 0.303469 | 0.243455 | 0.208216 | 0.170269 | 0.126448 | 0.168311 | 0.290672 | 0.579042 | 0.966917 | 0.022733 | -0.78826 |
| Q14669      | TRIP12     | 9320      | E3 ubiquitin-protein ligase TRIP12                        | S310  | 50    | RKSTKRSSEPPAEL   | K | T | 0.222179 | 0.203481 | 0.189168 | 0.161773 | 0.119844 | 0.132551 | 0.138056 | 0.204943 | 0.673632 | 0.744385 | 0.012955 | -0.56997 |
| Q3V6T2      | CCDC88A    | 55704     | Girdin                                                    | S1820 | 50    | EGTTRRTSISLDFLTK | R | T | 0.26354  | 0.226231 | 0.212278 | 0.154843 | 0.137611 | 0.152218 | 0.148224 | 0.234016 | 0.633391 | 0.218607 | 0.006122 | -0.65883 |
| Q725L9      | IRF2BP2    | 359948    | Interferon regulatory factor 2-binding protein 2          | S455  | 99.99 | HSTRNRNNSPPSPS   | R | T | 0.181178 | 0.175487 | 0.17125  | 0.121184 | 0.141339 | 0.131949 | 0.13149  | 0.175971 | 0.747226 | 0.392311 | 0.002378 | -0.42038 |
| Q15345      | LRRRC41    | 10489     | Leucine-rich repeat-containing protein 41                 | T327  | 50    | TRVTRRSTQESLTAG  | R | T | 0.310879 | 0.23517  | 0.211102 | 0.094006 | 0.091273 | 0.075307 | 0.086862 | 0.252384 | 0.344166 | 0.072519 | 0.005672 | -1.53882 |
| Q6ZUI8      | PIK3AP1    | 118788    | Phosphoinositide 3-kinase adaptor protein 1               | S759  | 44.44 | PEVTRRSRSPGPPQV  | R | T | 0.209895 | 0.203191 | 0.246319 | 0.099676 | 0.166693 | 0.12618  | 0.13085  | 0.219802 | 0.595308 | 0.640205 | 0.019752 | -0.74829 |
| AOA0G2JINT7 | KANS11     | 284058    | KAT8 regulatory NSL complex subunit 1                     | S827  | 77.59 | SLVLRQLSTSSDSFDA | R | V | 0.234911 | 0.222625 | 0.174126 | 0.145943 | 0.08133  | 0.104025 | 0.110432 | 0.210554 | 0.524488 | 0.980295 | 0.019478 | -0.93103 |
| P49757      | NUMB       | 8650      | Protein numb homolog                                      | T561  | 94.9  | PSLVRRQTFPPHYEAS | R | V | 0.304983 | 0.       |          |          |          |          |          |          |          |          |          |          |

6. E3 ligases which phosphorylation were downregulated at DAPK3 consensus site (R/K-X-X-S/T) in shDAPK3#1 cells and/or shTBK1#1 cells

\*; P<0.05, log2FC<-0.4 for shDAPK3#1, \$; P<0.1, log2FC<-0.4 for shDAPK3#1, #; P<0.05, log2FC<-0.4 for shTBK1#1

| Gene(Phosphosite) | shControl- | shControl- | shControl- | shDAPK3# | shDAPK3# | shDAPK3# | shTBK1#1- | shTBK1#1- | shTBK1#1- | FC (shDAP | F test(shD | P value (sh | LogFC (shL | Significanc | FC (shTBK | F test(shTI | P value(sh | LogFC (shT | Significance_ | shTBK1 |
|-------------------|------------|------------|------------|----------|----------|----------|-----------|-----------|-----------|-----------|------------|-------------|------------|-------------|-----------|-------------|------------|------------|---------------|--------|
| MLLT6(S423)       | 0.182993   | 0.143944   | 0.149547   | 0.107521 | 0.129917 | 0.123437 | 0.113661  | 0.159767  | 0.157502  | 0.75737   | 0.459083   | 0.050086    | -0.40093   | \$          | 0.904392  | 0.79518     | 0.476104   | -0.14498   |               |        |
| MYCBP2(S3426)     | 0.181932   | 0.220304   | 0.182338   | 0.112736 | 0.077143 | 0.133752 | 0.107877  | 0.194858  | 0.553618  | 0.553618  | 0.744584   | 0.014018    | -0.85304   | *           | 1.464919  | 0.017249    | 0.575432   | 0.550821   |               |        |
| PHF2(S899)        | 0.152925   | 0.18097    | 0.17037    | 0.108983 | 0.11283  | 0.093181 | 0.238632  | 0.240515  | 0.179114  | 0.62466   | 0.701936   | 0.003408    | -0.67886   | *           | 1.305387  | 0.282456    | 0.077705   | 0.384478   |               |        |
| PML(T513)         | 0.222521   | 0.11338    | 0.154541   | 0.10687  | 0.095646 | 0.067673 | 0.175976  | 0.106854  | 0.22012   | 0.550909  | 0.236536   | 0.096194    | -0.86011   | \$          | 1.025504  | 0.964838    | 0.931863   | 0.036334   |               |        |
| TRIP12(S312)      | 0.222179   | 0.203481   | 0.189168   | 0.161773 | 0.119844 | 0.132551 | 0.120744  | 0.173185  | 0.185829  | 0.673632  | 0.744385   | 0.012955    | -0.56997   | *           | 0.780314  | 0.374107    | 0.111274   | -0.35787   |               |        |
| AFF4(S212)        | 0.183069   | 0.201065   | 0.196062   | 0.10288  | 0.145138 | 0.119226 | 0.12474   | 0.132321  | 0.092243  | 0.632965  | 0.319347   | 0.006132    | -0.6598    | *           | 0.602044  | 0.319802    | 0.004568   | -0.73206   | #             |        |
| BAZ2A(S1747)      | 0.228166   | 0.225343   | 0.215449   | 0.150798 | 0.155822 | 0.112017 | 0.127893  | 0.11546   | 0.127934  | 0.625806  | 0.144017   | 0.004374    | -0.67621   | *           | 0.555024  | 0.926209    | 6.24E-05   | -0.84938   | #             |        |
| BRCA1(S1191)      | 0.313217   | 0.274203   | 0.320961   | 0.214063 | 0.209797 | 0.223055 | 0.192038  | 0.172467  | 0.137648  | 0.712163  | 0.135951   | 0.004353    | -0.48972   | *           | 0.5528    | 0.905621    | 0.003249   | -0.85517   | #             |        |
| IRF2BP2(S455)     | 0.181178   | 0.175487   | 0.17125    | 0.121184 | 0.141339 | 0.131949 | 0.122054  | 0.115282  | 0.111753  | 0.747226  | 0.392311   | 0.002378    | -0.42038   | *           | 0.661261  | 0.950503    | 0.000139   | -0.59671   | #             |        |
| LMO7(S751)        | 0.172075   | 0.199173   | 0.188319   | 0.192738 | 0.122214 | 0.106616 | 0.120438  | 0.120707  | 0.158765  | 0.753383  | 0.162317   | 0.171378    | -0.40855   | *           | 0.714678  | 0.553348    | 0.023687   | -0.48463   | #             |        |
| LMO7(S1197)       | 0.276331   | 0.272125   | 0.246908   | 0.141083 | 0.15238  | 0.152816 | 0.101941  | 0.121658  | 0.116054  | 0.5611    | 0.29748    | 0.000307    | -0.83367   | *           | 0.427041  | 0.579189    | 0.000154   | -1.22755   | #             |        |
| MYCBP2(S3478)     | 0.256976   | 0.227479   | 0.21346    | 0.11993  | 0.081147 | 0.099979 | 0.114255  | 0.079642  | 0.142648  | 0.431365  | 0.865173   | 0.001479    | -1.21302   | *           | 0.482216  | 0.662672    | 0.005667   | -1.05225   | #             |        |
| NSD1(S2471)       | 0.181393   | 0.191867   | 0.244619   | 0.154267 | 0.103864 | 0.159157 | 0.146661  | 0.172147  | 0.152545  | 0.675356  | 0.898617   | 0.064245    | -0.56628   | \$          | 0.762856  | 0.268481    | 0.080885   | -0.39052   |               |        |
| PHF3(S1758)       | 0.214591   | 0.215017   | 0.221775   | 0.13198  | 0.115355 | 0.14327  | 0.049485  | 0.064236  | 0.051253  | 0.599655  | 0.152216   | 0.0005      | -0.73779   | *           | 0.253269  | 0.400473    | 6.31E-06   | -1.98126   | #             |        |
| RNF169(S693)      | 0.169911   | 0.259812   | 0.242484   | 0.127431 | 0.104719 | 0.178647 | 0.030565  | 0.091298  | 0.065725  | 0.611117  | 0.773306   | 0.068342    | -0.71048   | \$          | 0.279063  | 0.580268    | 0.007803   | -1.84134   | #             |        |
| RNF25(S450)       | 0.313976   | 0.24776    | 0.280407   | 0.13546  | 0.126691 | 0.133396 | 0.063781  | 0.077292  | 0.080035  | 0.469691  | 0.037626   | 0.014719    | -1.09021   | *           | 0.262554  | 0.129197    | 0.00047    | -1.92931   | #             |        |
| RNF31(S466)       | 0.150392   | 0.203062   | 0.182159   | 0.130388 | 0.105232 | 0.146552 | 0.096325  | 0.133365  | 0.136481  | 0.713524  | 0.762696   | 0.058351    | -0.48697   | \$          | 0.683649  | 0.830041    | 0.047769   | -0.54867   | #             |        |
| SMARCD1(S79)      | 0.260745   | 0.264909   | 0.266736   | 0.135428 | 0.107347 | 0.13221  | 0.090212  | 0.097302  | 0.104365  | 0.473233  | 0.07676    | 0.000104    | -1.07938   | *           | 0.368352  | 0.316845    | 3.03E-06   | -1.44084   | #             |        |
| TRIM22(S384)      | 0.3248     | 0.24327    | 0.193978   | 0.067535 | 0.075789 | 0.064534 | 0.036315  | 0.048197  | 0.048029  | 0.272762  | 0.015445   | 0.03917     | -1.87429   | *           | 0.173927  | 0.021036    | 0.03037    | -2.52345   | #             |        |
| TRIM56(T442)      | 0.190971   | 0.247054   | 0.233069   | 0.156167 | 0.125692 | 0.206453 | 0.119801  | 0.140708  | 0.070493  | 0.727635  | 0.677554   | 0.103177    | -0.45871   |             | 0.493229  | 0.792021    | 0.013341   | -1.01967   | #             |        |
| WDR26(S121)       | 0.17495    | 0.205522   | 0.177151   | 0.11763  | 0.102752 | 0.132777 | 0.122173  | 0.125053  | 0.142013  | 0.633327  | 0.873387   | 0.006533    | -0.65898   | *           | 0.698031  | 0.566596    | 0.008481   | -0.51864   | #             |        |
| WDR62(T50)        | 0.200674   | 0.238509   | 0.223636   | 0.138052 | 0.138294 | 0.216442 | 0.128251  | 0.160589  | 0.103041  | 0.743473  | 0.302089   | 0.115906    | -0.42765   |             | 0.591233  | 0.607803    | 0.010625   | -0.7582    | #             |        |



**Supplementary Table. 3 TCGA Studies used for gene alteration analysis, related to Extended Data Fig. 8**

| <b>Cancer Type</b>                   | <b>TCGA study</b>     |
|--------------------------------------|-----------------------|
| Cervical Squamous Cell Carcinoma     | TCGA, PanCancer Atlas |
| Colorectal Adenocarcinoma            | TCGA, PanCancer Atlas |
| Esophageal Adenocarcinoma            | TCGA, PanCancer Atlas |
| Lung Adenocarcinoma                  | TCGA, PanCancer Atlas |
| Lung Squamous Cell Carcinoma         | TCGA, PanCancer Atlas |
| Ovarian Serous Cystadenocarcinoma    | TCGA, PanCancer Atlas |
| Pancreatic Adenocarcinoma            | TCGA, PanCancer Atlas |
| Sarcoma                              | TCGA, PanCancer Atlas |
| Skin Cutaneous Melanoma              | TCGA, PanCancer Atlas |
| Stomach Adenocarcinoma               | TCGA, PanCancer Atlas |
| Uterine Corpus Endometrial Carcinoma | TCGA, PanCancer Atlas |
| Uterine Carcinosarcoma               | TCGA, PanCancer Atlas |

**Supplementary Table. 4 List of antibodies used in the study**

**Antibodies for immunoblotting and immunoprecipitation**

| Primary antibodies          | Supplier                  | Catalog No. | Host species | Type       | Species reactivity | Applications |
|-----------------------------|---------------------------|-------------|--------------|------------|--------------------|--------------|
| anti-DAPK1                  | Cell Signaling Technology | 3008S       | rabbit       | polyclonal | Hu, Mo             | IB           |
| anti-DAPK3                  | Abcam                     | ab210528    | rabbit       | polyclonal | Hu                 | IB           |
| anti-DAPK3                  | Life Span Biosciences     | LS-C373328  | rabbit       | polyclonal | Mo                 | IB           |
| anti-LMO7                   | Sigma-Aldrich             | HPA020923   | rabbit       | polyclonal | Hu                 | IB           |
| anti-TRIP12                 | Bethyl Laboratories       | A301-814A   | rabbit       | polyclonal | Hu                 | IB           |
| anti-IRF3                   | Cell Signaling Technology | 4302S       | rabbit       | monoclonal | Hu, Mo             | IB           |
| anti-TBK1                   | Cell Signaling Technology | 3504S       | rabbit       | monoclonal | Hu, Mo             | IP, IB       |
| anti-TBK1                   | Cell Signaling Technology | 3013S       | rabbit       | polyclonal | Hu, Mo             | IB           |
| anti-STING                  | ABGENT                    | AP9047b     | rabbit       | polyclonal | Hu, Mo             | IB           |
| anti-STING                  | Cell Signaling Technology | 13647S      | rabbit       | monoclonal | Hu                 | IP, IB       |
| anti-phospho IRF3 (Ser396)  | Cell Signaling Technology | 4947S       | rabbit       | polyclonal | Hu, Mo             | IB           |
| anti-phospho TBK1 (Ser172)  | Cell Signaling Technology | 5483S       | rabbit       | monoclonal | Hu, Mo             | IB           |
| anti-phospho STING (Ser366) | Cell Signaling Technology | 85735S      | rabbit       | polyclonal | Hu                 | IB           |
| anti-phospho STING (Ser366) | Cell Signaling Technology | 19781S      | rabbit       | monoclonal | Hu                 | IB           |
| anti-phospho p65 (Ser536)   | Cell Signaling Technology | 3033S       | rabbit       | monoclonal | Hu, Mo             | IB           |
| anti-p65                    | Santa Cruz Biotechnology  | sc-372      | rabbit       | polyclonal | Hu, Mo             | IB           |
| anti-phospho STAT1 (Tyr701) | Cell Signaling Technology | 9167S       | rabbit       | monoclonal | Hu, Mo             | IB           |
| anti-STAT1                  | Cell Signaling Technology | 9175S       | rabbit       | monoclonal | Hu, Mo             | IB           |
| anti-gH2A.X (Ser139)        | EMD Millipore             | 05-636      | mouse        | monoclonal | Hu, Mo             | IB           |
| anti-cGAS                   | ABGENT                    | AP10510c    | rabbit       | polyclonal | Hu                 | IB           |
| anti-cGAS                   | Cell Signaling Technology | 31659S      | rabbit       | monoclonal | Mo                 | IB           |
| anti-MAVS                   | Abcam                     | ab31334     | rabbit       | polyclonal | Hu, Mo             | IB           |
| anti-DDX58                  | Abcam                     | ab45428     | rabbit       | polyclonal | Hu, Mo             | IB           |
| anti-STIM1                  | Cell Signaling Technology | 5668S       | rabbit       | monoclonal | Hu, Mo             | IB           |
| anti- $\beta$ -actin        | R&D                       | MAB8929     | mouse        | monoclonal | Hu, Mo             | IB           |
| anti-HA                     | Abcam                     | ab16918     | mouse        | monoclonal |                    | IP           |
| anti-HA                     | Sigma-Aldrich             | 11867423001 | rat          | monoclonal |                    | IB           |
| anti-HA                     | Cell Signaling Technology | 3724S       | rabbit       | monoclonal |                    | IB           |
| anti-Flag                   | Sigma-Aldrich             | F1804       | mouse        | monoclonal |                    | IP           |
| anti-Flag                   | Sigma-Aldrich             | F7425       | rabbit       | serum      |                    | IB           |
| anti-V5                     | Invitrogen                | R960-25     | mouse        | monoclonal |                    | IP, IB       |
| anti-V5                     | Sigma-Aldrich             | V8137       | rabbit       | serum      |                    | IB           |
| anti-GST                    | Santa Cruz Biotechnology  | sc-459      | rabbit       | polyclonal |                    | IB           |

| Secondary antibodies                  | Supplier                 | Catalog No. | Host species | Type       | Species reactivity | Applications |
|---------------------------------------|--------------------------|-------------|--------------|------------|--------------------|--------------|
| Peroxidase-conjugated anti-rabbit IgG | Sigma-Aldrich            | A0545       | Goat         | polyclonal |                    | IB           |
| Peroxidase-conjugated anti-mouse IgG  | Sigma-Aldrich            | A3682       | Goat         | polyclonal |                    | IB           |
| Peroxidase-conjugated anti-rat IgG    | Sigma-Aldrich            | A5795       | Rabbit       | polyclonal |                    | IB           |
| Clean Blot IP Detection Reagent       | Thermo Fisher Scientific | PI21230     |              |            |                    | IB           |

**Supplementary Table. 4 List of antibodies used in the study****Antibodies for immunostaining and confocal microscopy**

| Primary antibodies         | Supplier                  | Catalog No. | Host species |
|----------------------------|---------------------------|-------------|--------------|
| anti-IRF3                  | Santa Cruz Biotechnology  | sc-9082     | rabbit       |
| anti-p65                   | Santa Cruz Biotechnology  | sc-372      | rabbit       |
| anti-phospho TBK1 (Ser172) | Cell Signaling Technology | 5483S       | rabbit       |
| anti-TBK1                  | Abcam                     | ab40676     | rabbit       |
| anti-STING                 | R&D                       | AF6516      | sheep        |
| anti-Calreticulin          | Abcam                     | ab2907      | rabbit       |
| anti-GM130                 | Cell Signaling Technology | 12480S      | rabbit       |
| anti-gH2A.X (Ser139)       | EMD Millipore             | 05-636      | mouse        |

| Secondary antibodies        | Supplier               | Catalog No. | Host species |
|-----------------------------|------------------------|-------------|--------------|
| AF568 donkey anti-sheep IgG | Invitrogen             | A21099      | donkey       |
| AF647 goat anti-rabbit IgG  | Jackson ImmunoResearch | 111-605-104 | goat         |
| AF568 donkey anti-mouse IgG | Invitrogen             | A10037      | donkey       |

**Antibodies for flowcytometric analysis**

| Primary antibodies                         | Clone       | Supplier                  | Catalog No. |
|--------------------------------------------|-------------|---------------------------|-------------|
| Purified Rat Anti-Mouse CD16/CD32          | 2.4G2       | BD pharmingen             | 553141      |
| APC-Cy7 anti-mouse CD45                    | 30-F11      | Biolegend                 | 103116      |
| PerCP-Cy5.5 anti-mouse NK1.1               | PK136       | Thermo Fisher Scientific  | 45-5941-82  |
| FITC anti-mouse TCR beta                   | H57-597     | Thermo Fisher Scientific  | 11-5961-81  |
| BV421 anti-mouse CD8a                      | 53-6.7      | Biolegend                 | 100737      |
| BV605 anti-mouse CD4                       | RM4-5       | Biolegend                 | 100547      |
| BV421 anti-mouse CD4                       | RM4-5       | Biolegend                 | 100543      |
| BV650 anti-mouse CD25                      | PC6.1       | Biolegend                 | 102038      |
| APC anti-mouse/rat Foxp3                   | FJK-16s     | Thermo Fisher Scientific  | 17-5773-82  |
| PE/Dazzle594 anti-mouse Ly6G               | 1A8         | Biolegend                 | 127647      |
| BV570 anti-mouse Ly6C                      | HK1.4       | Biolegend                 | 128029      |
| AF700 anti-Gr-1(Ly6G/Ly6C)                 | RB6-8C5     | Thermo Fisher Scientific  | 56-5931-80  |
| PE anti-mouse/human CD11b                  | M1/70       | Biolegend                 | 101207      |
| FITC anti-mouse F4/80                      | N418        | Biolegend                 | 117305      |
| BV421 anti-mouse I-A/I-E (MHC-II)          | M5/114.15.2 | Biolegend                 | 107631      |
| BV605 anti-mouse CD206                     | C068C2      | Biolegend                 | 141721      |
| APC anti-mouse CD11c                       | N418        | Thermo Fisher Scientific  | 17-0114-81  |
| FITC anti-mouse CD103                      | 2E7         | Biolegend                 | 121419      |
| BV605 anti-mouse/human CD11b               | M1/70       | Biolegend                 | 101237      |
| BV421 anti-mouse CD11c                     | N418        | Biolegend                 | 117329      |
| PE conjugated clgG                         | DA1E        | Cell Signaling Technology | 5742S       |
| PE conjugated anti-phospho TBK1(Ser172)    | D52C2       | Cell Signaling Technology | 13498S      |
| AF647 conjugated clgG                      | DA1E        | Cell Signaling Technology | 2985S       |
| AF647 conjugated anti-phospho IRF3(Ser396) | D601M       | Cell Signaling Technology | 10327S      |

**Supplementary Table. 5 Sequences and catalog numbers of siRNA, shRNA, and plasmids used in the study**

| <b>Human siRNA</b> | <b>Sequence</b>     | <b>Dharmacon Catalog No.</b> |
|--------------------|---------------------|------------------------------|
| <i>DAPK1</i> #1    | GAAGAAAUGCCGUGAGAAA | D-004417-02                  |
| <i>DAPK1</i> #2    | GAACAGGUUUGGAAAUGAU | D-004417-04                  |
| <i>DAPK1</i> #3    | GAUCAAGCCUAAAGAUACA | D-004417-07                  |
| <i>DAPK1</i> #4    | GGAAACAAUCCGUUCGCUU | D-004417-21                  |
| <i>DAPK3</i> #1    | GAACAUUCCUGGAUUAAGG | D-004947-01                  |
| <i>DAPK3</i> #2    | CCACGCGUCUGAAGGAGUA | D-004947-02                  |
| <i>DAPK3</i> #3    | GAGCCAGGCCCGUAAGUUC | D-004947-03                  |
| <i>DAPK3</i> #4    | GAGGAGUACUUCAGCAACA | D-004947-04                  |
| <i>STING1</i> #1   | GCACCUGUGUCCUGGAGUA | D-024333-01                  |
| <i>STING1</i> #2   | GGUCAUUAUACAUCGGAUA | D-024333-02                  |
| <i>STING1</i> #3   | GCAUCAAGGAUCGGGUUUA | D-024333-03                  |
| <i>STING1</i> #4   | ACAUUCGCUUCCUGGAUAA | D-024333-04                  |
| <i>LMO7</i> #1     | CUACUGAACUGGAUGAUUA | D-019252-01                  |
| <i>LMO7</i> #2     | GAGUAUAAUGGAGAUGUU  | D-019252-02                  |
| <i>LMO7</i> #3     | UAGCAGGAUUGGAUAAUAU | D-019252-03                  |
| <i>LMO7</i> #4     | GGACUAUUCUCAUUAAGGC | D-019252-04                  |
| <i>TRIP12</i> #1   | GAACUGACAUCUCUGAUUU | D-007182-01                  |
| <i>TRIP12</i> #2   | CCAAAGAUUCGUUACAAA  | D-007182-02                  |
| <i>TRIP12</i> #3   | CAAAUAAGCCACAUAGUAA | D-007182-04                  |
| <i>TRIP12</i> #4   | GAACACAGAUGGUGCGAUA | D-007182-18                  |

| <b>Mouse siRNA</b> | <b>Sequence</b>     | <b>Dharmacon Catalog No.</b> |
|--------------------|---------------------|------------------------------|
| <i>Dapk1</i> #1    | GGAUACACCUCAAGAAAU  | D-040260-01                  |
| <i>Dapk1</i> #2    | GAAUCAAGCUAAACUGUU  | D-040260-02                  |
| <i>Dapk1</i> #3    | AAACGAGGCUCAAGGAUUG | D-040260-03                  |
| <i>Dapk1</i> #4    | GAAGGAAUCUCUGACUGAA | D-040260-04                  |
| <i>Dapk3</i> #1    | UCUCAGCAGUGAACUAUGA | D-044800-01                  |
| <i>Dapk3</i> #2    | CCACGCAGUUCUCAACA   | D-044800-02                  |
| <i>Dapk3</i> #3    | GGGAGGAGAUCGAACGCGA | D-044800-03                  |
| <i>Dapk3</i> #4    | CCGAGAUUGUAACUAUGA  | D-044800-04                  |
| <i>Cgas</i> #1     | GGAUUGAGCUACAAGAAUA | D-055608-01                  |
| <i>Cgas</i> #2     | AGAAUUCUCUGUGGAUUA  | D-055608-02                  |
| <i>Cgas</i> #3     | GAAGAUCCGCGUAGAAGGA | D-055608-03                  |
| <i>Cgas</i> #4     | GCUAAGAAGCCGUCCGCGA | D-055608-04                  |
| <i>Sting1</i> #1   | CGAAAUACUGCCGCCUCA  | D-055528-01                  |
| <i>Sting1</i> #2   | CAAUACACUCUGAAGUA   | D-055528-02                  |
| <i>Sting1</i> #3   | AACAUUCGAUUCGAGUA   | D-055528-03                  |
| <i>Sting1</i> #4   | GCAUCAAGAAUCGGGUUUA | D-055528-04                  |

**Supplementary Table. 5 Sequences and catalog numbers of siRNA, shRNA, and plasmids used in the study**

| <b>Human shRNA</b> | <b>Sequence</b>                                              | <b>Clone ID</b> |
|--------------------|--------------------------------------------------------------|-----------------|
| <i>DAPK3</i> #1    | CCGGCGTTCACTACCTGCACTCTAACTCGAGTTAGAGTGCAGGTAGTGAACGTTTTT    | TRCN000009945   |
| <i>DAPK3</i> #2    | CCGGGCACGACATCTTCGAGAACAACCTCGAGTTGTTCTCGAAGATGTCGTGCTTTTTTG | TRCN0000199874  |
| <i>STING1</i> #1   | CCGGGTTTACAGCAACAGCATCTATCTCGAGATAGATGCTGTTGCTGTAAACTTTTTTG  | TRCN0000134594  |
| <i>STING1</i> #2   | CCGGGCAGAGCTATTTCCCTCCCACTCGAGTGTGGAAGGAAATAGCTCTGCTTTTTTG   | TRCN0000163029  |
| <i>TBK1</i> #1     | CCGGGCAGAACGTAGATTAGCTTATCTCGAGATAAGCTAATCTACGTTCTGCTTTTTG   | TRCN0000314787  |
| <i>TBK1</i> #2     | CCGGGCGGCAGAGTTAGGTGAAATTCTCGAGAATTTCACTAACTCTGCCGCTTTTTG    | TRCN0000314840  |
| <i>LMO7</i> #1     | CCGGGCCTCTTTAGATTACATAGAACCTCGAGTTCTATGTAATCTAAAGAGGCTTTTT   | TRCN0000006489  |
| <i>LMO7</i> #2     | CCGGGCGTCATTAAGAAGATCAATACTCGAGTATTGATCTTCTTAATGACGCTTTTT    | TRCN0000006491  |
| <i>TRIP12</i> #1   | CCGGGTATCTAAGACTGGTTATATTCTCGAGAATATAACCAGTCTTAGATACTTTTTG   | TRCN0000273207  |
| <i>TRIP12</i> #2   | CCGGTATCAGTCGATACTGGTATTACTCGAGTAATACCAGTATCGACTGATATTTTTG   | TRCN0000273136  |

| <b>Mouse shRNA</b> | <b>Sequence</b>                                             | <b>Clone ID</b> |
|--------------------|-------------------------------------------------------------|-----------------|
| <i>Dapk3</i> #1    | CCGGGCAGTGAACATGACTTTGATCTCGAGATCAAAGTCATAGTTCACTGCTTTTT    | TRCN0000024246  |
| <i>Dapk3</i> #2    | CCGGGCATGACGTGTTTCGAGAACAACCTCGAGTTGTTCTCGAACACGTCATGCTTTTT | TRCN0000024248  |
| <i>Dapk3</i> #3    | CCGGCCCAACATCATAACACTGCATCTCGAGATGCAGTGTATGATGTTGGGTTTTT    | TRCN0000024244  |
| <i>Dapk3</i> #4    | CCGGCGCATTAAAGCTCATCGACTTTCTCGAGAAAGTCGATGAGCTTAATGCGTTTTT  | TRCN0000024245  |
| <i>Sting1</i> #1   | CCGGATGATTCTACTATCGTCTTATCTCGAGATAAGACGATAGTAGAATCATTTTTTG  | TRCN0000346320  |
| <i>Sting1</i> #2   | CCGGCAACATTGATTCCGAGATATCTCGAGATATCTCGGAATCGAATGTTGTTTTTG   | TRCN0000346266  |
| <i>Tbk1</i> #1     | CCGGGCTGGCCGAGAACAATCATATCTCGAGATATGATTGTTCTCGCCAGCTTTTT    | TRCN0000026954  |
| <i>Tbk1</i> #2     | CCGGCCAGAATCAGAATTTCTATTCTCGAGAATGAGAAATTCTGATTCTGGTTTTT    | TRCN0000027015  |

**Supplementary Table. 5 Sequences and catalog numbers of siRNA, shRNA, and plasmids used in the study****Human ORF clones**

| <b>Gene name</b> | <b>Supplier</b> | <b>Catalog No.</b> | <b>NCBI Accession No.</b> | <b>Definition</b>                                                                         |
|------------------|-----------------|--------------------|---------------------------|-------------------------------------------------------------------------------------------|
| <i>LMO7</i>      | Genscript       | OHu08783           | NM_005358.5               | Homo sapiens LIM domain 7 (LMO7), transcript variant 1, mRNA                              |
| <i>MLLT6</i>     | Genscript       | OHu05249           | NM_005937.4               | Homo sapiens MLLT6, PHD finger containing (MLLT6), mRNA.                                  |
| <i>RNF31</i>     | Genscript       | OHu25779           | NM_017999.5               | Homo sapiens ring finger protein 31 (RNF31), transcript variant 1, mRNA.                  |
| <i>TRIM22</i>    | Genscript       | OHu15306           | NM_006074.5               | Homo sapiens tripartite motif containing 22 (TRIM22), transcript variant 1, mRNA.         |
| <i>TRIM56</i>    | Genscript       | OHu72997           | XM_011516589.3            | Homo sapiens tripartite motif containing 56 (TRIM56), transcript variant X1, mRNA.        |
| <i>TRIP12</i>    | Genscript       | OHu08708           | NM_004238.3               | Homo sapiens thyroid hormone receptor interactor 12 (TRIP12), transcript variant 3, mRNA. |
| <i>WDR26</i>     | Genscript       | OHu01176           | NM_025160.6               | Homo sapiens WD repeat domain 26 (WDR26), transcript variant 1, mRNA.                     |

**Other plasmids**

| <b>Name</b>                 | <b>Supplier</b> | <b>Catalog No.</b> |
|-----------------------------|-----------------|--------------------|
| pDONR223-DAPK3              | Addgene         | 23436              |
| pLX304                      | Addgene         | 25890              |
| psPAX2                      | Addgene         | 12260              |
| pMD.2G                      | Addgene         | 12259              |
| pLenti-CMV-Puro-LUC         | Addgene         | 17477              |
| pEF-BOS huTBK1 FlagHis      | Addgene         | 27241              |
| pEF-BOS huTBK1 K38M FlagHis | Addgene         | 27240              |

**Supplementary Table. 6 Sequences of qRT-PCR primers and cloning primers used in the study**

**Primers for SYBR green**

| Gene                | Forward primer           | Reverse primer           |
|---------------------|--------------------------|--------------------------|
| Human <i>IFNB1</i>  | GCTTGGATTCTACAAAGAAGCA   | ATAGATGGTCAATGCGGCGTC    |
| Human <i>CXCL10</i> | GTGGCATTCAAGGAGTACCTC    | TGATGGCCTTCGATTCTGGATT   |
| Human <i>CCL5</i>   | CCAGCAGTCGTCTTTGTAC      | CTCTGGGTTGGCACACTT       |
| Human <i>ACTB</i>   | TGAAGTGTGACGTGGACATC     | GGAGGAGCAATGATCTTGAT     |
| Mouse <i>Ifnb1</i>  | AGTCCAAGAAAGGACGAACA     | GCCCTGTAGGTGAGGTTGAT     |
| Mouse <i>Actb</i>   | TCATCACTATTGGCAACGAGCGGT | TGCCACAGGATTCCATACCCAAGA |

**Taqman probes**

| Gene                | Supplier           | Catalog No.   |
|---------------------|--------------------|---------------|
| Human <i>DAPK1</i>  | Applied Biosystems | Hs00234489_m1 |
| Human <i>DAPK2</i>  | Applied Biosystems | Hs00204888_m1 |
| Human <i>DAPK3</i>  | Applied Biosystems | Hs00154676_m1 |
| Human <i>IFNB1</i>  | Applied Biosystems | Hs01077958_s1 |
| Human <i>IL6</i>    | Applied Biosystems | Hs00985639_m1 |
| Human <i>ACTB</i>   | Applied Biosystems | Hs01060665_g1 |
| Mouse <i>Ifnb1</i>  | Applied Biosystems | Mm00439552_s1 |
| Mouse <i>Cxcl10</i> | Applied Biosystems | Mm00445235_g1 |
| Mouse <i>Mx2</i>    | Applied Biosystems | Mm00488995_m1 |
| Mouse <i>Il6</i>    | Applied Biosystems | Mm00446190_m1 |
| Mouse <i>Dapk1</i>  | Applied Biosystems | Mm00459400_m1 |
| Mouse <i>Dapk2</i>  | Applied Biosystems | Mm00802402_m1 |
| Mouse <i>Dapk3</i>  | Applied Biosystems | Mm01172884_m1 |
| Mouse <i>Actb</i>   | Applied Biosystems | Mm02619580_g1 |
| Mouse <i>Rn18s</i>  | Applied Biosystems | Mm03928990_g1 |

**For pGEX-4T-2 cloning (recombinant GST-tagged protein)**

| Gene                | Forward primer                   | Reverse primer                      |
|---------------------|----------------------------------|-------------------------------------|
| GST-LMO7(360-460)   | ttgtcgactCAAAAGATTTATGGTG        | aaagcggccgctcaCTTTTGATTTTGGGATTCCCT |
| GST-LMO7(810-910)   | ttgtcgactTCAGAAAAATCTCAAATC      | aaagcggccgctcaTAGGCGTCTCTGCTCCT     |
| GST-TRIP12(260-360) | tttgatccTTTGATTGGGCTGC           | aaagcggccgctcaTTCAGGGTCTGCCATTTT    |
| GST-TRIM56(400-500) | ttgtcgactCCGAAGACTGAGAGACAGG     | aaagcggccgctcaCCGCGTGGGGAAACTG      |
| GST-STING(149-379)  | cccGGATCCgaaaaaggaattcaacg       | cccGCGCCGCTcaagagaaatccgtcggagag    |
| GST-TBK1(K38M)      | aaaggatccATGCAGAGCACTTCTAATCATCT | aaagcggccgctTAAAGACAGTCAACGTTGCGAA  |
